# Supplementary material for: Mapping the sevoflurane-binding sites of calmodulin
Source: PubMed Central journal article supplement (PMC4186402; doi:10.1002/prp2.25), 2014-02-12
Supplement: prp20002-e00025-SD1.pdf [file prp20002-e00025-SD1.pdf]

## Supplemental Information

### Mapping the Sevoflurane Binding Sites of Calmodulin

Ulrika Brath, Kelvin Lau, Filip Van Petegem, Máté Erdélyi\*

#### Table of Contents

|            |                                                                                                                                                                                                                                                                          |
|------------|--------------------------------------------------------------------------------------------------------------------------------------------------------------------------------------------------------------------------------------------------------------------------|
| <b>S2</b>  | Figure S1. The $\Delta\delta(^1\text{H}, ^{13}\text{C})$ of $(\text{Ca}^{2+})_4\text{-CaM}$ , in Hz, upon addition of sevoflurane.<br>Figure S2. The $\Delta\delta(^1\text{H}, ^{15}\text{N})$ of $(\text{Ca}^{2+})_4\text{-CaM}$ , in Hz, upon addition of sevoflurane. |
| <b>S3</b>  | Figure S3. $^1\text{H}, ^1\text{H}$ -NOESY spectrum of $(\text{Ca}^{2+})_4\text{-CaM}$ with sevoflurane.<br>Figure S4. $^{19}\text{F}, ^1\text{H}$ -HOESY spectrum of $(\text{Ca}^{2+})_4\text{-CaM}$ with sevoflurane.                                                  |
| <b>S4</b>  | Figure S5. 2D plane of 3D- $^1\text{H}, ^{13}\text{C}, ^1\text{H}$ -HSQC–NOESY acquired on $(\text{Ca}^{2+})_4\text{-CaM}$ with SF.<br>Figure S6. $^1\text{H}$ NMR determination of the aqueous concentration of sevoflurane.                                            |
| <b>S5</b>  | PDB coordinates of the $(\text{Ca}^{2+})_4\text{-CaM}$ – SF complex.                                                                                                                                                                                                     |
| <b>S65</b> | References                                                                                                                                                                                                                                                               |

## Supplemental Figures

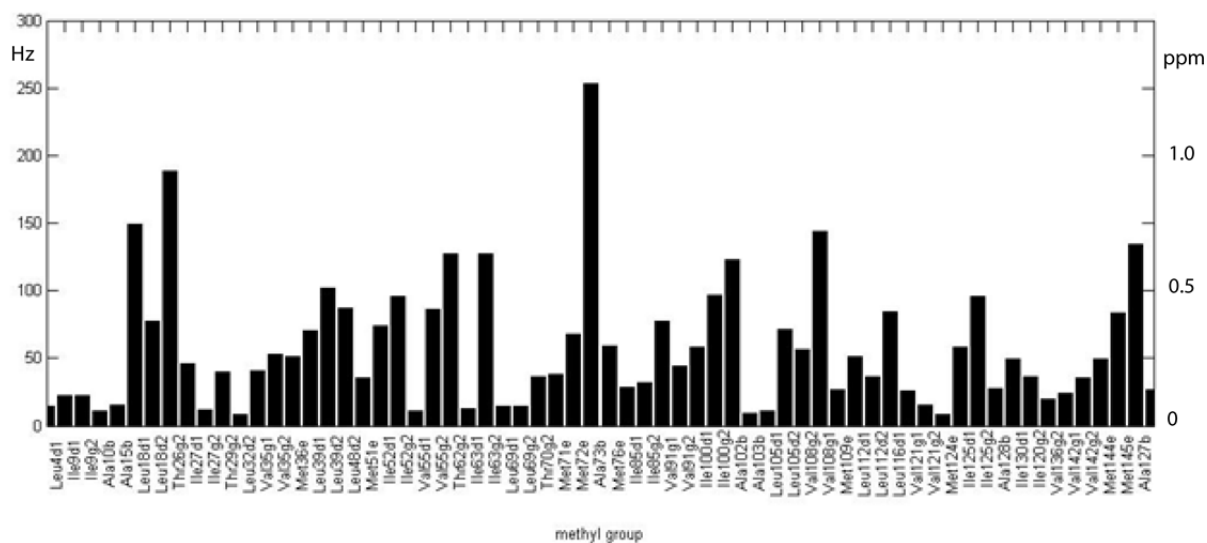

**Supplemental Figure S1.**  $\Delta\delta(^1\text{H}, ^{13}\text{C})$ , in Hz, plotted for each methyl group, in sequence order, comparing samples of 0.2 mM  $(\text{Ca}^{2+})_4\text{-CaM}$  with 0 or 10 mM SF, further details are given in the main text.

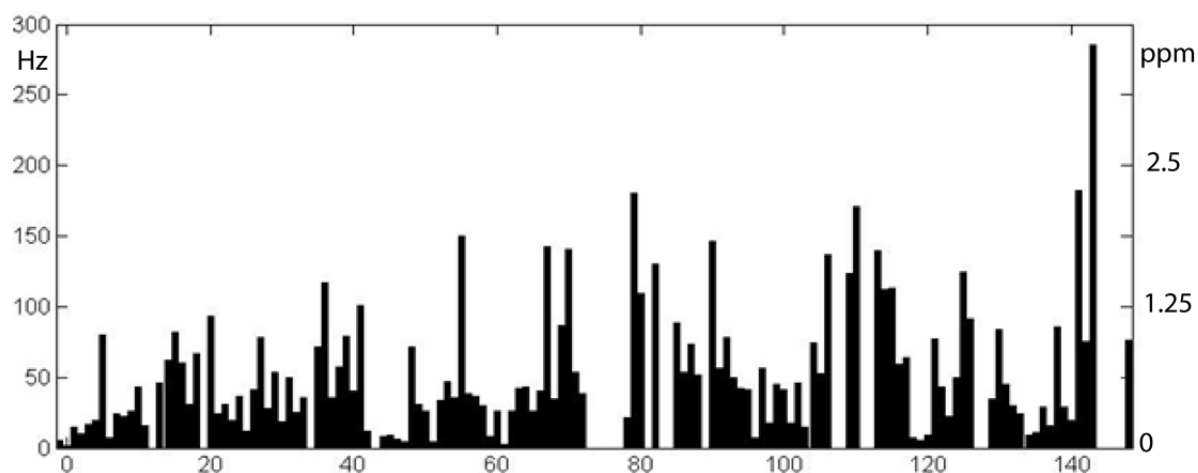

**Supplemental Figure S2.** Plot of  $\Delta\delta(^1\text{H}, ^{15}\text{N})$ , in Hz, versus residue number, comparing samples of 0.2 mM  $(\text{Ca}^{2+})_4\text{-CaM}$  with 0 or 10 mM SF, further details are given in the main text.

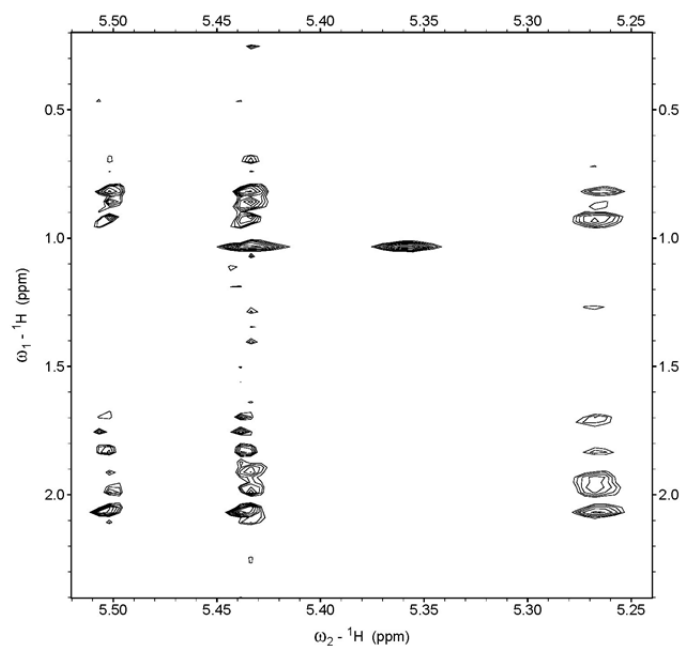

**Supplemental Figure S3.** Expansion of  $^1\text{H}, ^1\text{H}$ -NOESY spectrum of  $(\text{Ca}^{2+})_4\text{-CaM}$  with SF (details given above) spanning off-diagonal cross peaks between SF signals  $\delta F_2, ^1\text{H}$  5.44 and 5.50 ppm (doublet) and  $\delta F_2, ^1\text{H}$  5.26 and  $\delta F_1, ^1\text{H}$  0.6 – 2.4, where the latter corresponds to the  $(\text{Ca}^{2+})_4\text{-CaM}$  methyl region.

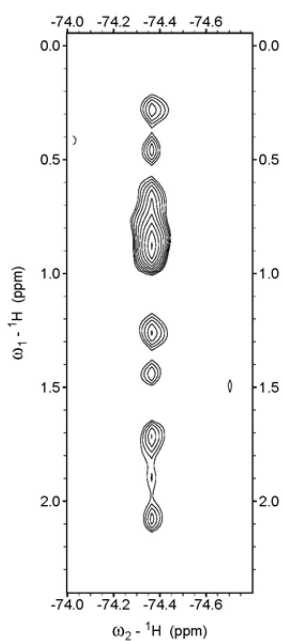

**Supplemental Figure S4.**  $^{19}\text{F}, ^1\text{H}$ -HOESY spectrum of  $(\text{Ca}^{2+})_4\text{-CaM}$  with SF (details given above) spanning off-diagonal cross peaks between the SF signal at  $\delta F_2, ^{19}\text{F}$  -74.4 ppm and  $\delta F_1, ^1\text{H}$  0.6 – 2.4, where the latter corresponds to the  $(\text{Ca}^{2+})_4\text{-CaM}$  methyl region.

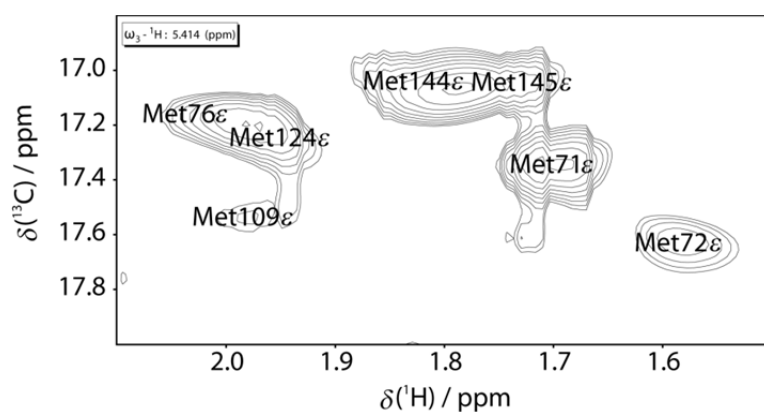

**Supplementary Figure S5.** 2D plane of 3D- $^1\text{H}$ ,  $^{13}\text{C}$ ,  $^1\text{H}$ -HSQC-NOESY acquired on  $(\text{Ca}^{2+})_4\text{-CaM}$  with SF. The  $F_1 \times F_2$  plane at  $\omega_{F_3, ^1\text{H}}$  5.41 ppm corresponding to one of the SF doublet signals is shown. Cross peaks available in these plane, assigned to Met71 $\epsilon$ , Met72 $\epsilon$ , Met76 $\epsilon$ , Met109 $\epsilon$ , Met124 $\epsilon$ , Met144 $\epsilon$  and Met145 $\epsilon$ , report on  $(\text{Ca}^{2+})_4\text{-CaM}$  – SF NOE interactions.

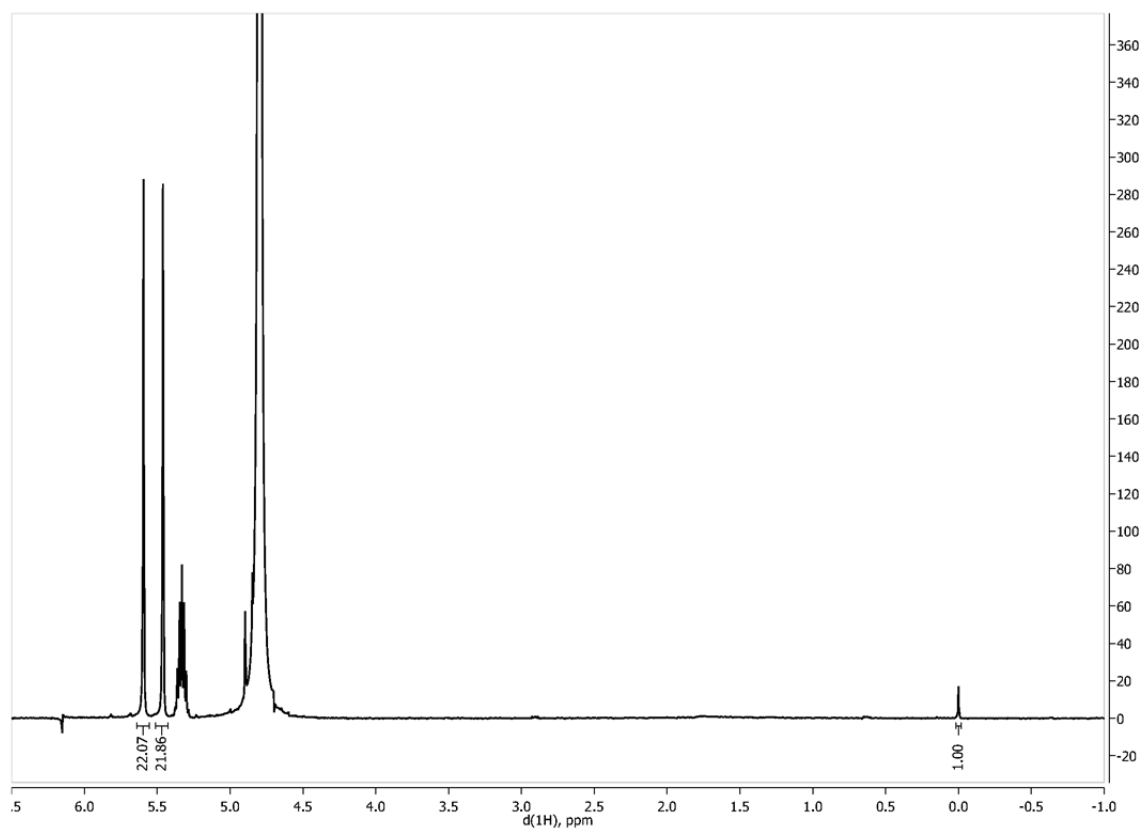

**Supplemental Figure S6.** The concentration of sevoflurane (SF) in its saturated aqueous solution used in the ITC studies was determined by  $^1\text{H}$  NMR (400 MHz) using a  $\text{D}_2\text{O}$  solution of SF and 4,4-dimethyl-4-silapentane-1-sulfonic acid (DSS, 0.1 mM) as internal reference (the signal corresponds to 9H and its integral is set to 1.00 here). Long  $d_1$  relaxation time (25 sec) was used and no presaturation of the solvent signal. The aqueous SF concentration was determined to 19.7 mM.

## PDB coordinates of the (Ca<sup>2+</sup>)<sub>4</sub>-CaM – SF complex

Docking of sevoflurane to (Ca<sup>2+</sup>)<sub>4</sub>-CaM (pdb id 1X02) was performed using the program Glide (Grid-based Ligand Docking with Energetics, Schrödinger, Inc.), as described in detail in the experimental session of the main text.

```

TITLE      1x02_reduced_wi thoutpl us_cacorrect
REMARK 888
REMARK 888 WRITTEN BY MAESTRO (A PRODUCT OF SCHRODINGER, LLC)
HELIX 49 49 GLU 6 SER 17 1 12
HELIX 50 50 THR 29 LEU 39 1 11
HELIX 51 51 GLU 45 VAL 55 1 11
HELIX 52 52 PHE 65 ASP 78 1 14
HELIX 53 53 ASP 80 PHE 92 1 13
HELIX 54 54 ALA 102 GLY 113 1 12
HELIX 55 55 ASP 118 ALA 128 1 11
HELIX 56 56 TYR 138 MET 145 1 8
MODEL 1
ATOM 1 N ALA 1 32.285 14.223 7.039 1.00 0.00 N
ATOM 2 CA ALA 1 31.935 12.933 7.622 1.00 0.00 C
ATOM 3 C ALA 1 32.819 12.616 8.822 1.00 0.00 C
ATOM 4 O ALA 1 33.074 11.451 9.128 1.00 0.00 O
ATOM 5 CB ALA 1 32.050 11.834 6.575 1.00 0.00 C
ATOM 6 HA ALA 1 30.906 12.981 7.947 1.00 0.00 H
ATOM 7 1HB ALA 1 33.077 11.746 6.256 1.00 0.00 H
ATOM 8 2HB ALA 1 31.724 10.897 7.001 1.00 0.00 H
ATOM 9 3HB ALA 1 31.428 12.079 5.727 1.00 0.00 H
ATOM 10 1H ALA 1 32.353 14.305 6.065 1.00 0.00 H
ATOM 11 H1 ALA 1 31.592 14.911 7.301 1.00 0.00 H
ATOM 12 H2 ALA 1 33.191 14.513 7.379 1.00 0.00 H
ATOM 13 N ASP 2 33.284 13.660 9.501 1.00 0.00 N
ATOM 14 CA ASP 2 34.139 13.492 10.670 1.00 0.00 C
ATOM 15 C ASP 2 33.316 13.107 11.895 1.00 0.00 C
ATOM 16 O ASP 2 33.809 12.436 12.800 1.00 0.00 O
ATOM 17 CB ASP 2 34.920 14.778 10.946 1.00 0.00 C
ATOM 18 CG ASP 2 35.961 15.065 9.882 1.00 0.00 C
ATOM 19 OD1 ASP 2 36.455 14.100 9.262 1.00 0.00 O
ATOM 20 OD2 ASP 2 36.282 16.254 9.670 1.00 0.00 O
ATOM 21 H ASP 2 33.045 14.565 9.208 1.00 0.00 H
ATOM 22 HA ASP 2 34.840 12.697 10.457 1.00 0.00 H
ATOM 23 2HB3 ASP 2 35.419 14.691 11.900 1.00 0.00 H
ATOM 24 HB2 ASP 2 34.232 15.625 10.963 1.00 0.00 H
ATOM 25 N GLN 3 32.060 13.542 11.917 1.00 0.00 N
ATOM 26 CA GLN 3 31.170 13.244 13.033 1.00 0.00 C
ATOM 27 C GLN 3 30.420 11.938 12.798 1.00 0.00 C
ATOM 28 O GLN 3 29.274 11.781 13.220 1.00 0.00 O
ATOM 29 CB GLN 3 30.173 14.388 13.236 1.00 0.00 C
ATOM 30 CG GLN 3 30.767 15.591 13.951 1.00 0.00 C
ATOM 31 CD GLN 3 31.160 15.285 15.383 1.00 0.00 C
ATOM 32 OE1 GLN 3 30.363 15.448 16.306 1.00 0.00 O
ATOM 33 NE2 GLN 3 32.395 14.836 15.574 1.00 0.00 N
ATOM 34 H GLN 3 31.725 14.075 11.167 1.00 0.00 H
ATOM 35 HA GLN 3 31.774 13.144 13.921 1.00 0.00 H
ATOM 36 2HB3 GLN 3 29.341 14.024 13.820 1.00 0.00 H
ATOM 37 2HG3 GLN 3 30.034 16.386 13.957 1.00 0.00 H
ATOM 38 1HE2 GLN 3 32.975 14.729 14.790 1.00 0.00 H
ATOM 39 2HE2 GLN 3 32.676 14.629 16.489 1.00 0.00 H
ATOM 40 HB2 GLN 3 29.826 14.745 12.266 1.00 0.00 H
ATOM 41 HG2 GLN 3 31.668 15.915 13.431 1.00 0.00 H
ATOM 42 N LEU 4 31.075 11.000 12.120 1.00 0.00 N
ATOM 43 CA LEU 4 30.470 9.705 11.829 1.00 0.00 C
ATOM 44 C LEU 4 31.451 8.570 12.106 1.00 0.00 C
ATOM 45 O LEU 4 31.678 7.710 11.253 1.00 0.00 O
ATOM 46 CB LEU 4 30.008 9.651 10.371 1.00 0.00 C
ATOM 47 CG LEU 4 28.937 10.665 9.968 1.00 0.00 C
ATOM 48 CD1 LEU 4 29.125 11.096 8.523 1.00 0.00 C
ATOM 49 CD2 LEU 4 27.546 10.082 10.177 1.00 0.00 C
ATOM 50 H LEU 4 31.985 11.181 11.811 1.00 0.00 H
ATOM 51 HA LEU 4 29.612 9.586 12.475 1.00 0.00 H
ATOM 52 2HB3 LEU 4 29.616 8.661 10.186 1.00 0.00 H
ATOM 53 HG LEU 4 29.029 11.543 10.593 1.00 0.00 H
ATOM 54 1HD1 LEU 4 28.815 12.124 8.410 1.00 0.00 H
ATOM 55 2HD1 LEU 4 28.527 10.468 7.880 1.00 0.00 H
ATOM 56 3HD1 LEU 4 30.166 11.002 8.253 1.00 0.00 H
ATOM 57 1HD2 LEU 4 27.242 10.236 11.202 1.00 0.00 H

```

|      |     |      |     |   |        |        |        |      |      |   |
|------|-----|------|-----|---|--------|--------|--------|------|------|---|
| ATOM | 58  | 2HD2 | LEU | 4 | 27.566 | 9.024  | 9.962  | 1.00 | 0.00 | H |
| ATOM | 59  | 3HD2 | LEU | 4 | 26.847 | 10.574 | 9.516  | 1.00 | 0.00 | H |
| ATOM | 60  | HB2  | LEU | 4 | 30.850 | 9.873  | 9.714  | 1.00 | 0.00 | H |
| ATOM | 61  | N    | THR | 5 | 32.031 | 8.574  | 13.302 | 1.00 | 0.00 | N |
| ATOM | 62  | CA   | THR | 5 | 32.988 | 7.545  | 13.691 | 1.00 | 0.00 | C |
| ATOM | 63  | C    | THR | 5 | 32.281 | 6.247  | 14.057 | 1.00 | 0.00 | C |
| ATOM | 64  | O    | THR | 5 | 31.062 | 6.130  | 13.914 | 1.00 | 0.00 | O |
| ATOM | 65  | CB   | THR | 5 | 33.847 | 8.001  | 14.884 | 1.00 | 0.00 | C |
| ATOM | 66  | OG1  | THR | 5 | 33.126 | 8.955  | 15.674 | 1.00 | 0.00 | O |
| ATOM | 67  | CG2  | THR | 5 | 35.155 | 8.618  | 14.406 | 1.00 | 0.00 | C |
| ATOM | 68  | H    | THR | 5 | 31.808 | 9.286  | 13.936 | 1.00 | 0.00 | H |
| ATOM | 69  | HA   | THR | 5 | 33.641 | 7.364  | 12.850 | 1.00 | 0.00 | H |
| ATOM | 70  | HB   | THR | 5 | 34.076 | 7.140  | 15.495 | 1.00 | 0.00 | H |
| ATOM | 71  | 1HG  | THR | 5 | 33.583 | 9.093  | 16.507 | 1.00 | 0.00 | H |
| ATOM | 72  | 1HG2 | THR | 5 | 35.488 | 9.355  | 15.121 | 1.00 | 0.00 | H |
| ATOM | 73  | 2HG2 | THR | 5 | 34.999 | 9.090  | 13.447 | 1.00 | 0.00 | H |
| ATOM | 74  | 3HG2 | THR | 5 | 35.902 | 7.845  | 14.311 | 1.00 | 0.00 | H |
| ATOM | 75  | N    | GLU | 6 | 33.048 | 5.271  | 14.530 | 1.00 | 0.00 | N |
| ATOM | 76  | CA   | GLU | 6 | 32.494 | 3.979  | 14.915 | 1.00 | 0.00 | C |
| ATOM | 77  | C    | GLU | 6 | 31.081 | 4.138  | 15.472 | 1.00 | 0.00 | C |
| ATOM | 78  | O    | GLU | 6 | 30.216 | 3.292  | 15.246 | 1.00 | 0.00 | O |
| ATOM | 79  | CB   | GLU | 6 | 33.390 | 3.305  | 15.955 | 1.00 | 0.00 | C |
| ATOM | 80  | CG   | GLU | 6 | 34.713 | 2.812  | 15.393 | 1.00 | 0.00 | C |
| ATOM | 81  | CD   | GLU | 6 | 34.533 | 1.741  | 14.335 | 1.00 | 0.00 | C |
| ATOM | 82  | OE1  | GLU | 6 | 33.746 | 0.800  | 14.570 | 1.00 | 0.00 | O |
| ATOM | 83  | OE2  | GLU | 6 | 35.180 | 1.844  | 13.272 | 1.00 | 0.00 | O |
| ATOM | 84  | H    | GLU | 6 | 34.012 | 5.424  | 14.622 | 1.00 | 0.00 | H |
| ATOM | 85  | HA   | GLU | 6 | 32.452 | 3.360  | 14.033 | 1.00 | 0.00 | H |
| ATOM | 86  | 2HB3 | GLU | 6 | 32.862 | 2.457  | 16.370 | 1.00 | 0.00 | H |
| ATOM | 87  | 2HG3 | GLU | 6 | 35.304 | 2.406  | 16.199 | 1.00 | 0.00 | H |
| ATOM | 88  | HB2  | GLU | 6 | 33.638 | 4.019  | 16.740 | 1.00 | 0.00 | H |
| ATOM | 89  | HG2  | GLU | 6 | 35.240 | 3.643  | 14.922 | 1.00 | 0.00 | H |
| ATOM | 90  | N    | GLU | 7 | 30.857 | 5.229  | 16.199 | 1.00 | 0.00 | N |
| ATOM | 91  | CA   | GLU | 7 | 29.551 | 5.497  | 16.787 | 1.00 | 0.00 | C |
| ATOM | 92  | C    | GLU | 7 | 28.459 | 5.473  | 15.723 | 1.00 | 0.00 | C |
| ATOM | 93  | O    | GLU | 7 | 27.475 | 4.744  | 15.846 | 1.00 | 0.00 | O |
| ATOM | 94  | CB   | GLU | 7 | 29.558 | 6.855  | 17.498 | 1.00 | 0.00 | C |
| ATOM | 95  | CG   | GLU | 7 | 30.560 | 7.839  | 16.921 | 1.00 | 0.00 | C |
| ATOM | 96  | CD   | GLU | 7 | 31.904 | 7.777  | 17.618 | 1.00 | 0.00 | C |
| ATOM | 97  | OE1  | GLU | 7 | 32.722 | 6.905  | 17.255 | 1.00 | 0.00 | O |
| ATOM | 98  | OE2  | GLU | 7 | 32.139 | 8.601  | 18.529 | 1.00 | 0.00 | O |
| ATOM | 99  | H    | GLU | 7 | 31.588 | 5.867  | 16.343 | 1.00 | 0.00 | H |
| ATOM | 100 | HA   | GLU | 7 | 29.347 | 4.723  | 17.513 | 1.00 | 0.00 | H |
| ATOM | 101 | 2HB3 | GLU | 7 | 29.795 | 6.699  | 18.540 | 1.00 | 0.00 | H |
| ATOM | 102 | 2HG3 | GLU | 7 | 30.162 | 8.838  | 17.023 | 1.00 | 0.00 | H |
| ATOM | 103 | HB2  | GLU | 7 | 28.578 | 7.323  | 17.396 | 1.00 | 0.00 | H |
| ATOM | 104 | HG2  | GLU | 7 | 30.733 | 7.608  | 15.870 | 1.00 | 0.00 | H |
| ATOM | 105 | N    | GLN | 8 | 28.639 | 6.278  | 14.680 | 1.00 | 0.00 | N |
| ATOM | 106 | CA   | GLN | 8 | 27.668 | 6.349  | 13.595 | 1.00 | 0.00 | C |
| ATOM | 107 | C    | GLN | 8 | 27.825 | 5.165  | 12.644 | 1.00 | 0.00 | C |
| ATOM | 108 | O    | GLN | 8 | 26.844 | 4.525  | 12.268 | 1.00 | 0.00 | O |
| ATOM | 109 | CB   | GLN | 8 | 27.827 | 7.663  | 12.824 | 1.00 | 0.00 | C |
| ATOM | 110 | CG   | GLN | 8 | 27.441 | 8.891  | 13.631 | 1.00 | 0.00 | C |
| ATOM | 111 | CD   | GLN | 8 | 25.957 | 8.949  | 13.931 | 1.00 | 0.00 | C |
| ATOM | 112 | OE1  | GLN | 8 | 25.180 | 9.526  | 13.170 | 1.00 | 0.00 | O |
| ATOM | 113 | NE2  | GLN | 8 | 25.554 | 8.349  | 15.046 | 1.00 | 0.00 | N |
| ATOM | 114 | H    | GLN | 8 | 29.443 | 6.834  | 14.639 | 1.00 | 0.00 | H |
| ATOM | 115 | HA   | GLN | 8 | 26.681 | 6.316  | 14.031 | 1.00 | 0.00 | H |
| ATOM | 116 | 2HB3 | GLN | 8 | 27.205 | 7.626  | 11.942 | 1.00 | 0.00 | H |
| ATOM | 117 | 2HG3 | GLN | 8 | 27.716 | 9.773  | 13.071 | 1.00 | 0.00 | H |
| ATOM | 118 | 1HE2 | GLN | 8 | 26.229 | 7.909  | 15.603 | 1.00 | 0.00 | H |
| ATOM | 119 | 2HE2 | GLN | 8 | 24.600 | 8.371  | 15.265 | 1.00 | 0.00 | H |
| ATOM | 120 | HB2  | GLN | 8 | 28.873 | 7.796  | 12.544 | 1.00 | 0.00 | H |
| ATOM | 121 | HG2  | GLN | 8 | 27.960 | 8.874  | 14.590 | 1.00 | 0.00 | H |
| ATOM | 122 | N    | ILE | 9 | 29.064 | 4.883  | 12.259 | 1.00 | 0.00 | N |
| ATOM | 123 | CA   | ILE | 9 | 29.350 | 3.778  | 11.352 | 1.00 | 0.00 | C |
| ATOM | 124 | C    | ILE | 9 | 28.551 | 2.536  | 11.734 | 1.00 | 0.00 | C |
| ATOM | 125 | O    | ILE | 9 | 28.002 | 1.851  | 10.871 | 1.00 | 0.00 | O |
| ATOM | 126 | CB   | ILE | 9 | 30.850 | 3.428  | 11.347 | 1.00 | 0.00 | C |
| ATOM | 127 | CG2  | ILE | 9 | 31.110 | 2.231  | 10.445 | 1.00 | 0.00 | C |
| ATOM | 128 | CG1  | ILE | 9 | 31.676 | 4.634  | 10.894 | 1.00 | 0.00 | C |
| ATOM | 129 | CD1  | ILE | 9 | 33.165 | 4.448  | 11.080 | 1.00 | 0.00 | C |
| ATOM | 130 | H    | ILE | 9 | 29.806 | 5.432  | 12.591 | 1.00 | 0.00 | H |
| ATOM | 131 | HA   | ILE | 9 | 29.069 | 4.083  | 10.356 | 1.00 | 0.00 | H |
| ATOM | 132 | HB   | ILE | 9 | 31.138 | 3.159  | 12.352 | 1.00 | 0.00 | H |
| ATOM | 133 | 1HG2 | ILE | 9 | 32.037 | 1.759  | 10.733 | 1.00 | 0.00 | H |
| ATOM | 134 | 2HG2 | ILE | 9 | 30.301 | 1.524  | 10.542 | 1.00 | 0.00 | H |

|      |     |      |      |    |        |        |        |      |      |   |
|------|-----|------|------|----|--------|--------|--------|------|------|---|
| ATOM | 135 | 3HG2 | I LE | 9  | 31.178 | 2.561  | 9.419  | 1.00 | 0.00 | H |
| ATOM | 136 | 2HG3 | I LE | 9  | 31.375 | 5.501  | 11.464 | 1.00 | 0.00 | H |
| ATOM | 137 | 1HD1 | I LE | 9  | 33.680 | 5.356  | 10.797 | 1.00 | 0.00 | H |
| ATOM | 138 | 2HD1 | I LE | 9  | 33.375 | 4.224  | 12.116 | 1.00 | 0.00 | H |
| ATOM | 139 | 3HD1 | I LE | 9  | 33.508 | 3.633  | 10.460 | 1.00 | 0.00 | H |
| ATOM | 140 | HG2  | I LE | 9  | 31.508 | 4.811  | 9.832  | 1.00 | 0.00 | H |
| ATOM | 141 | N    | ALA  | 10 | 28.489 | 2.254  | 13.032 | 1.00 | 0.00 | N |
| ATOM | 142 | CA   | ALA  | 10 | 27.752 | 1.097  | 13.527 | 1.00 | 0.00 | C |
| ATOM | 143 | C    | ALA  | 10 | 26.266 | 1.211  | 13.201 | 1.00 | 0.00 | C |
| ATOM | 144 | O    | ALA  | 10 | 25.641 | 0.242  | 12.775 | 1.00 | 0.00 | O |
| ATOM | 145 | CB   | ALA  | 10 | 27.957 | 0.945  | 15.026 | 1.00 | 0.00 | C |
| ATOM | 146 | H    | ALA  | 10 | 28.947 | 2.839  | 13.669 | 1.00 | 0.00 | H |
| ATOM | 147 | HA   | ALA  | 10 | 28.150 | 0.216  | 13.043 | 1.00 | 0.00 | H |
| ATOM | 148 | 1HB  | ALA  | 10 | 28.589 | 1.745  | 15.385 | 1.00 | 0.00 | H |
| ATOM | 149 | 2HB  | ALA  | 10 | 27.001 | 0.989  | 15.526 | 1.00 | 0.00 | H |
| ATOM | 150 | 3HB  | ALA  | 10 | 28.425 | -0.005 | 15.230 | 1.00 | 0.00 | H |
| ATOM | 151 | N    | GLU  | 11 | 25.711 | 2.401  | 13.406 | 1.00 | 0.00 | N |
| ATOM | 152 | CA   | GLU  | 11 | 24.298 | 2.640  | 13.135 | 1.00 | 0.00 | C |
| ATOM | 153 | C    | GLU  | 11 | 23.996 | 2.488  | 11.648 | 1.00 | 0.00 | C |
| ATOM | 154 | O    | GLU  | 11 | 23.146 | 1.686  | 11.254 | 1.00 | 0.00 | O |
| ATOM | 155 | CB   | GLU  | 11 | 23.893 | 4.037  | 13.609 | 1.00 | 0.00 | C |
| ATOM | 156 | CG   | GLU  | 11 | 23.565 | 4.105  | 15.091 | 1.00 | 0.00 | C |
| ATOM | 157 | CD   | GLU  | 11 | 22.191 | 3.550  | 15.410 | 1.00 | 0.00 | C |
| ATOM | 158 | OE1  | GLU  | 11 | 22.081 | 2.326  | 15.625 | 1.00 | 0.00 | O |
| ATOM | 159 | OE2  | GLU  | 11 | 21.224 | 4.340  | 15.445 | 1.00 | 0.00 | O |
| ATOM | 160 | H    | GLU  | 11 | 26.264 | 3.136  | 13.747 | 1.00 | 0.00 | H |
| ATOM | 161 | HA   | GLU  | 11 | 23.726 | 1.905  | 13.684 | 1.00 | 0.00 | H |
| ATOM | 162 | 2HB3 | GLU  | 11 | 23.023 | 4.353  | 13.054 | 1.00 | 0.00 | H |
| ATOM | 163 | 2HG3 | GLU  | 11 | 23.601 | 5.137  | 15.408 | 1.00 | 0.00 | H |
| ATOM | 164 | HB2  | GLU  | 11 | 24.720 | 4.730  | 13.448 | 1.00 | 0.00 | H |
| ATOM | 165 | HG2  | GLU  | 11 | 24.291 | 3.515  | 15.652 | 1.00 | 0.00 | H |
| ATOM | 166 | N    | PHE  | 12 | 24.697 | 3.262  | 10.825 | 1.00 | 0.00 | N |
| ATOM | 167 | CA   | PHE  | 12 | 24.502 | 3.214  | 9.381  | 1.00 | 0.00 | C |
| ATOM | 168 | C    | PHE  | 12 | 24.769 | 1.812  | 8.841  | 1.00 | 0.00 | C |
| ATOM | 169 | O    | PHE  | 12 | 24.206 | 1.410  | 7.823  | 1.00 | 0.00 | O |
| ATOM | 170 | CB   | PHE  | 12 | 25.422 | 4.223  | 8.689  | 1.00 | 0.00 | C |
| ATOM | 171 | CG   | PHE  | 12 | 24.917 | 5.635  | 8.749  | 1.00 | 0.00 | C |
| ATOM | 172 | CD1  | PHE  | 12 | 24.084 | 6.129  | 7.755  | 1.00 | 0.00 | C |
| ATOM | 173 | CE1  | PHE  | 12 | 23.618 | 7.431  | 7.808  | 1.00 | 0.00 | C |
| ATOM | 174 | CZ   | PHE  | 12 | 23.980 | 8.251  | 8.859  | 1.00 | 0.00 | C |
| ATOM | 175 | CE2  | PHE  | 12 | 24.807 | 7.770  | 9.853  | 1.00 | 0.00 | C |
| ATOM | 176 | CD2  | PHE  | 12 | 25.272 | 6.470  | 9.796  | 1.00 | 0.00 | C |
| ATOM | 177 | H    | PHE  | 12 | 25.359 | 3.880  | 11.200 | 1.00 | 0.00 | H |
| ATOM | 178 | HA   | PHE  | 12 | 23.476 | 3.478  | 9.177  | 1.00 | 0.00 | H |
| ATOM | 179 | 2HB3 | PHE  | 12 | 25.527 | 3.949  | 7.650  | 1.00 | 0.00 | H |
| ATOM | 180 | 1HD  | PHE  | 12 | 23.801 | 5.488  | 6.934  | 1.00 | 0.00 | H |
| ATOM | 181 | 1HE  | PHE  | 12 | 22.971 | 7.803  | 7.029  | 1.00 | 0.00 | H |
| ATOM | 182 | HZ   | PHE  | 12 | 23.616 | 9.266  | 8.901  | 1.00 | 0.00 | H |
| ATOM | 183 | 2HE  | PHE  | 12 | 25.091 | 8.409  | 10.677 | 1.00 | 0.00 | H |
| ATOM | 184 | 2HD  | PHE  | 12 | 25.919 | 6.093  | 10.576 | 1.00 | 0.00 | H |
| ATOM | 185 | HB2  | PHE  | 12 | 26.397 | 4.219  | 9.178  | 1.00 | 0.00 | H |
| ATOM | 186 | N    | LYS  | 13 | 25.629 | 1.072  | 9.532  | 1.00 | 0.00 | N |
| ATOM | 187 | CA   | LYS  | 13 | 25.971 | -0.285 | 9.125  | 1.00 | 0.00 | C |
| ATOM | 188 | C    | LYS  | 13 | 24.713 | -1.113 | 8.879  | 1.00 | 0.00 | C |
| ATOM | 189 | O    | LYS  | 13 | 24.532 | -1.676 | 7.801  | 1.00 | 0.00 | O |
| ATOM | 190 | CB   | LYS  | 13 | 26.836 | -0.957 | 10.193 | 1.00 | 0.00 | C |
| ATOM | 191 | CG   | LYS  | 13 | 27.469 | -2.259 | 9.732  | 1.00 | 0.00 | C |
| ATOM | 192 | CD   | LYS  | 13 | 28.691 | -2.611 | 10.565 | 1.00 | 0.00 | C |
| ATOM | 193 | CE   | LYS  | 13 | 28.300 | -3.265 | 11.879 | 1.00 | 0.00 | C |
| ATOM | 194 | NZ   | LYS  | 13 | 29.479 | -3.469 | 12.768 | 1.00 | 0.00 | N |
| ATOM | 195 | H    | LYS  | 13 | 26.046 | 1.450  | 10.337 | 1.00 | 0.00 | H |
| ATOM | 196 | HA   | LYS  | 13 | 26.531 | -0.224 | 8.205  | 1.00 | 0.00 | H |
| ATOM | 197 | 2HB3 | LYS  | 13 | 26.223 | -1.164 | 11.058 | 1.00 | 0.00 | H |
| ATOM | 198 | 2HG3 | LYS  | 13 | 27.765 | -2.160 | 8.699  | 1.00 | 0.00 | H |
| ATOM | 199 | 2HD3 | LYS  | 13 | 29.245 | -1.705 | 10.773 | 1.00 | 0.00 | H |
| ATOM | 200 | 2HE3 | LYS  | 13 | 27.849 | -4.224 | 11.669 | 1.00 | 0.00 | H |
| ATOM | 201 | 1HZ  | LYS  | 13 | 30.134 | -2.666 | 12.683 | 1.00 | 0.00 | H |
| ATOM | 202 | 2HZ  | LYS  | 13 | 29.979 | -4.341 | 12.503 | 1.00 | 0.00 | H |
| ATOM | 203 | 3HZ  | LYS  | 13 | 29.170 | -3.549 | 13.758 | 1.00 | 0.00 | H |
| ATOM | 204 | HB2  | LYS  | 13 | 27.661 | -0.296 | 10.463 | 1.00 | 0.00 | H |
| ATOM | 205 | HG2  | LYS  | 13 | 26.749 | -3.070 | 9.837  | 1.00 | 0.00 | H |
| ATOM | 206 | HD2  | LYS  | 13 | 29.317 | -3.311 | 10.012 | 1.00 | 0.00 | H |
| ATOM | 207 | HE2  | LYS  | 13 | 27.595 | -2.626 | 12.409 | 1.00 | 0.00 | H |
| ATOM | 208 | N    | GLU  | 14 | 23.848 | -1.178 | 9.888  | 1.00 | 0.00 | N |
| ATOM | 209 | CA   | GLU  | 14 | 22.607 | -1.936 | 9.778  | 1.00 | 0.00 | C |
| ATOM | 210 | C    | GLU  | 14 | 21.827 | -1.530 | 8.532  | 1.00 | 0.00 | C |
| ATOM | 211 | O    | GLU  | 14 | 21.323 | -2.379 | 7.797  | 1.00 | 0.00 | O |

|      |     |      |     |    |        |        |        |      |      |   |
|------|-----|------|-----|----|--------|--------|--------|------|------|---|
| ATOM | 212 | CB   | GLU | 14 | 21.743 | -1.724 | 11.025 | 1.00 | 0.00 | C |
| ATOM | 213 | CG   | GLU | 14 | 22.437 | -2.110 | 12.320 | 1.00 | 0.00 | C |
| ATOM | 214 | CD   | GLU | 14 | 22.869 | -3.565 | 12.338 | 1.00 | 0.00 | C |
| ATOM | 215 | OE1  | GLU | 14 | 22.042 | -4.433 | 11.995 | 1.00 | 0.00 | O |
| ATOM | 216 | OE2  | GLU | 14 | 24.035 | -3.830 | 12.696 | 1.00 | 0.00 | O |
| ATOM | 217 | H    | GLU | 14 | 24.048 | -0.705 | 10.722 | 1.00 | 0.00 | H |
| ATOM | 218 | HA   | GLU | 14 | 22.862 | -2.983 | 9.704  | 1.00 | 0.00 | H |
| ATOM | 219 | 2HB3 | GLU | 14 | 20.847 | -2.318 | 10.930 | 1.00 | 0.00 | H |
| ATOM | 220 | 2HG3 | GLU | 14 | 21.757 | -1.941 | 13.142 | 1.00 | 0.00 | H |
| ATOM | 221 | HB2  | GLU | 14 | 21.491 | -0.666 | 11.117 | 1.00 | 0.00 | H |
| ATOM | 222 | HG2  | GLU | 14 | 23.336 | -1.504 | 12.445 | 1.00 | 0.00 | H |
| ATOM | 223 | N    | ALA | 15 | 21.735 | -0.224 | 8.299  | 1.00 | 0.00 | N |
| ATOM | 224 | CA   | ALA | 15 | 21.018 | 0.296  | 7.140  | 1.00 | 0.00 | C |
| ATOM | 225 | C    | ALA | 15 | 21.733 | -0.071 | 5.844  | 1.00 | 0.00 | C |
| ATOM | 226 | O    | ALA | 15 | 21.164 | 0.037  | 4.757  | 1.00 | 0.00 | O |
| ATOM | 227 | CB   | ALA | 15 | 20.861 | 1.804  | 7.249  | 1.00 | 0.00 | C |
| ATOM | 228 | H    | ALA | 15 | 22.158 | 0.404  | 8.918  | 1.00 | 0.00 | H |
| ATOM | 229 | HA   | ALA | 15 | 20.032 | -0.146 | 7.131  | 1.00 | 0.00 | H |
| ATOM | 230 | 1HB  | ALA | 15 | 20.356 | 2.178  | 6.370  | 1.00 | 0.00 | H |
| ATOM | 231 | 2HB  | ALA | 15 | 20.281 | 2.042  | 8.129  | 1.00 | 0.00 | H |
| ATOM | 232 | 3HB  | ALA | 15 | 21.836 | 2.263  | 7.325  | 1.00 | 0.00 | H |
| ATOM | 233 | N    | PHE | 16 | 22.983 | -0.505 | 5.964  | 1.00 | 0.00 | N |
| ATOM | 234 | CA   | PHE | 16 | 23.777 | -0.886 | 4.801  | 1.00 | 0.00 | C |
| ATOM | 235 | C    | PHE | 16 | 23.979 | -2.397 | 4.752  | 1.00 | 0.00 | C |
| ATOM | 236 | O    | PHE | 16 | 24.518 | -2.932 | 3.783  | 1.00 | 0.00 | O |
| ATOM | 237 | CB   | PHE | 16 | 25.133 | -0.179 | 4.829  | 1.00 | 0.00 | C |
| ATOM | 238 | CG   | PHE | 16 | 25.998 | -0.492 | 3.641  | 1.00 | 0.00 | C |
| ATOM | 239 | CD1  | PHE | 16 | 25.835 | 0.199  | 2.450  | 1.00 | 0.00 | C |
| ATOM | 240 | CE1  | PHE | 16 | 26.628 | -0.090 | 1.354  | 1.00 | 0.00 | C |
| ATOM | 241 | CZ   | PHE | 16 | 27.596 | -1.071 | 1.443  | 1.00 | 0.00 | C |
| ATOM | 242 | CE2  | PHE | 16 | 27.767 | -1.765 | 2.623  | 1.00 | 0.00 | C |
| ATOM | 243 | CD2  | PHE | 16 | 26.972 | -1.475 | 3.716  | 1.00 | 0.00 | C |
| ATOM | 244 | H    | PHE | 16 | 23.382 | -0.570 | 6.858  | 1.00 | 0.00 | H |
| ATOM | 245 | HA   | PHE | 16 | 23.237 | -0.578 | 3.917  | 1.00 | 0.00 | H |
| ATOM | 246 | 2HB3 | PHE | 16 | 25.669 | -0.477 | 5.718  | 1.00 | 0.00 | H |
| ATOM | 247 | 1HD  | PHE | 16 | 25.081 | 0.967  | 2.381  | 1.00 | 0.00 | H |
| ATOM | 248 | 1HE  | PHE | 16 | 26.493 | 0.454  | 0.431  | 1.00 | 0.00 | H |
| ATOM | 249 | HZ   | PHE | 16 | 28.216 | -1.297 | 0.587  | 1.00 | 0.00 | H |
| ATOM | 250 | 2HE  | PHE | 16 | 28.522 | -2.534 | 2.696  | 1.00 | 0.00 | H |
| ATOM | 251 | 2HD  | PHE | 16 | 27.104 | -2.019 | 4.639  | 1.00 | 0.00 | H |
| ATOM | 252 | HB2  | PHE | 16 | 24.982 | 0.900  | 4.828  | 1.00 | 0.00 | H |
| ATOM | 253 | N    | SER | 17 | 23.545 | -3.081 | 5.806  | 1.00 | 0.00 | N |
| ATOM | 254 | CA   | SER | 17 | 23.684 | -4.531 | 5.887  | 1.00 | 0.00 | C |
| ATOM | 255 | C    | SER | 17 | 22.461 | -5.225 | 5.294  | 1.00 | 0.00 | C |
| ATOM | 256 | O    | SER | 17 | 22.563 | -6.322 | 4.742  | 1.00 | 0.00 | O |
| ATOM | 257 | CB   | SER | 17 | 23.878 | -4.967 | 7.342  | 1.00 | 0.00 | C |
| ATOM | 258 | OG   | SER | 17 | 25.252 | -4.993 | 7.687  | 1.00 | 0.00 | O |
| ATOM | 259 | H    | SER | 17 | 23.127 | -2.598 | 6.551  | 1.00 | 0.00 | H |
| ATOM | 260 | HA   | SER | 17 | 24.555 | -4.813 | 5.317  | 1.00 | 0.00 | H |
| ATOM | 261 | 2HB3 | SER | 17 | 23.465 | -5.954 | 7.476  | 1.00 | 0.00 | H |
| ATOM | 262 | HG   | SER | 17 | 25.673 | -5.748 | 7.266  | 1.00 | 0.00 | H |
| ATOM | 263 | HB2  | SER | 17 | 23.369 | -4.265 | 8.003  | 1.00 | 0.00 | H |
| ATOM | 264 | N    | LEU | 18 | 21.308 | -4.581 | 5.415  | 1.00 | 0.00 | N |
| ATOM | 265 | CA   | LEU | 18 | 20.063 | -5.136 | 4.891  | 1.00 | 0.00 | C |
| ATOM | 266 | C    | LEU | 18 | 20.016 | -5.030 | 3.371  | 1.00 | 0.00 | C |
| ATOM | 267 | O    | LEU | 18 | 19.550 | -5.943 | 2.689  | 1.00 | 0.00 | O |
| ATOM | 268 | CB   | LEU | 18 | 18.861 | -4.412 | 5.504  | 1.00 | 0.00 | C |
| ATOM | 269 | CG   | LEU | 18 | 18.397 | -3.151 | 4.773  | 1.00 | 0.00 | C |
| ATOM | 270 | CD1  | LEU | 18 | 16.920 | -2.894 | 5.039  | 1.00 | 0.00 | C |
| ATOM | 271 | CD2  | LEU | 18 | 19.231 | -1.950 | 5.193  | 1.00 | 0.00 | C |
| ATOM | 272 | H    | LEU | 18 | 21.287 | -3.711 | 5.867  | 1.00 | 0.00 | H |
| ATOM | 273 | HA   | LEU | 18 | 20.024 | -6.179 | 5.170  | 1.00 | 0.00 | H |
| ATOM | 274 | 2HB3 | LEU | 18 | 19.123 | -4.131 | 6.513  | 1.00 | 0.00 | H |
| ATOM | 275 | HG   | LEU | 18 | 18.523 | -3.291 | 3.708  | 1.00 | 0.00 | H |
| ATOM | 276 | 1HD1 | LEU | 18 | 16.785 | -2.610 | 6.071  | 1.00 | 0.00 | H |
| ATOM | 277 | 2HD1 | LEU | 18 | 16.356 | -3.793 | 4.835  | 1.00 | 0.00 | H |
| ATOM | 278 | 3HD1 | LEU | 18 | 16.573 | -2.098 | 4.397  | 1.00 | 0.00 | H |
| ATOM | 279 | 1HD2 | LEU | 18 | 18.647 | -1.050 | 5.086  | 1.00 | 0.00 | H |
| ATOM | 280 | 2HD2 | LEU | 18 | 20.108 | -1.887 | 4.566  | 1.00 | 0.00 | H |
| ATOM | 281 | 3HD2 | LEU | 18 | 19.533 | -2.065 | 6.223  | 1.00 | 0.00 | H |
| ATOM | 282 | HB2  | LEU | 18 | 17.993 | -5.072 | 5.492  | 1.00 | 0.00 | H |
| ATOM | 283 | N    | PHE | 19 | 20.502 | -3.911 | 2.846  | 1.00 | 0.00 | N |
| ATOM | 284 | CA   | PHE | 19 | 20.520 | -3.685 | 1.407  | 1.00 | 0.00 | C |
| ATOM | 285 | C    | PHE | 19 | 21.480 | -4.649 | 0.714  | 1.00 | 0.00 | C |
| ATOM | 286 | O    | PHE | 19 | 21.138 | -5.268 | -0.291 | 1.00 | 0.00 | O |
| ATOM | 287 | CB   | PHE | 19 | 20.919 | -2.240 | 1.098  | 1.00 | 0.00 | C |
| ATOM | 288 | CG   | PHE | 19 | 19.746 | -1.308 | 0.982  | 1.00 | 0.00 | C |



|      |     |      |     |    |        |         |        |      |      |   |
|------|-----|------|-----|----|--------|---------|--------|------|------|---|
| ATOM | 289 | CD1  | PHE | 19 | 18.913 | -1.356  | -0.125 | 1.00 | 0.00 | C |
| ATOM | 290 | CE1  | PHE | 19 | 17.835 | -0.498  | -0.235 | 1.00 | 0.00 | C |
| ATOM | 291 | CZ   | PHE | 19 | 17.580 | 0.419   | 0.765  | 1.00 | 0.00 | C |
| ATOM | 292 | CE2  | PHE | 19 | 18.401 | 0.476   | 1.872  | 1.00 | 0.00 | C |
| ATOM | 293 | CD2  | PHE | 19 | 19.480 | -0.383  | 1.978  | 1.00 | 0.00 | C |
| ATOM | 294 | H    | PHE | 19 | 20.862 | -3.218  | 3.443  | 1.00 | 0.00 | H |
| ATOM | 295 | HA   | PHE | 19 | 19.522 | -3.862  | 1.033  | 1.00 | 0.00 | H |
| ATOM | 296 | 2HB3 | PHE | 19 | 21.458 | -2.215  | 0.165  | 1.00 | 0.00 | H |
| ATOM | 297 | 1HD  | PHE | 19 | 19.113 | -2.074  | -0.908 | 1.00 | 0.00 | H |
| ATOM | 298 | 1HE  | PHE | 19 | 17.195 | -0.547  | -1.102 | 1.00 | 0.00 | H |
| ATOM | 299 | HZ   | PHE | 19 | 16.736 | 1.088   | 0.680  | 1.00 | 0.00 | H |
| ATOM | 300 | 2HE  | PHE | 19 | 18.204 | 1.195   | 2.655  | 1.00 | 0.00 | H |
| ATOM | 301 | 2HD  | PHE | 19 | 20.121 | -0.335  | 2.845  | 1.00 | 0.00 | H |
| ATOM | 302 | HB2  | PHE | 19 | 21.544 | -1.857  | 1.903  | 1.00 | 0.00 | H |
| ATOM | 303 | N    | ASP | 20 | 22.684 | -4.768  | 1.265  | 1.00 | 0.00 | N |
| ATOM | 304 | CA   | ASP | 20 | 23.696 | -5.655  | 0.700  | 1.00 | 0.00 | C |
| ATOM | 305 | C    | ASP | 20 | 23.301 | -7.116  | 0.887  | 1.00 | 0.00 | C |
| ATOM | 306 | O    | ASP | 20 | 23.650 | -7.743  | 1.887  | 1.00 | 0.00 | O |
| ATOM | 307 | CB   | ASP | 20 | 25.052 | -5.393  | 1.355  | 1.00 | 0.00 | C |
| ATOM | 308 | CG   | ASP | 20 | 26.102 | -6.404  | 0.936  | 1.00 | 0.00 | C |
| ATOM | 309 | OD1  | ASP | 20 | 26.169 | -6.723  | -0.270 | 1.00 | 0.00 | O |
| ATOM | 310 | OD2  | ASP | 20 | 26.855 | -6.877  | 1.812  | 1.00 | 0.00 | O |
| ATOM | 311 | H    | ASP | 20 | 22.897 | -4.248  | 2.067  | 1.00 | 0.00 | H |
| ATOM | 312 | HA   | ASP | 20 | 23.769 | -5.445  | -0.354 | 1.00 | 0.00 | H |
| ATOM | 313 | 2HB3 | ASP | 20 | 24.943 | -5.439  | 2.429  | 1.00 | 0.00 | H |
| ATOM | 314 | HB2  | ASP | 20 | 25.414 | -4.408  | 1.061  | 1.00 | 0.00 | H |
| ATOM | 315 | N    | LYS | 21 | 22.570 | -7.654  | -0.084 | 1.00 | 0.00 | N |
| ATOM | 316 | CA   | LYS | 21 | 22.125 | -9.042  | -0.028 | 1.00 | 0.00 | C |
| ATOM | 317 | C    | LYS | 21 | 23.275 | -9.993  | -0.351 | 1.00 | 0.00 | C |
| ATOM | 318 | O    | LYS | 21 | 23.420 | -11.040 | 0.277  | 1.00 | 0.00 | O |
| ATOM | 319 | CB   | LYS | 21 | 20.972 | -9.269  | -1.007 | 1.00 | 0.00 | C |
| ATOM | 320 | CG   | LYS | 21 | 19.791 | -8.339  | -0.782 | 1.00 | 0.00 | C |
| ATOM | 321 | CD   | LYS | 21 | 19.080 | -8.649  | 0.525  | 1.00 | 0.00 | C |
| ATOM | 322 | CE   | LYS | 21 | 17.606 | -8.281  | 0.458  | 1.00 | 0.00 | C |
| ATOM | 323 | NZ   | LYS | 21 | 16.832 | -8.886  | 1.577  | 1.00 | 0.00 | N |
| ATOM | 324 | H    | LYS | 21 | 22.323 | -7.104  | -0.857 | 1.00 | 0.00 | H |
| ATOM | 325 | HA   | LYS | 21 | 21.781 | -9.241  | 0.975  | 1.00 | 0.00 | H |
| ATOM | 326 | 2HB3 | LYS | 21 | 20.625 | -10.288 | -0.906 | 1.00 | 0.00 | H |
| ATOM | 327 | 2HG3 | LYS | 21 | 19.092 | -8.455  | -1.598 | 1.00 | 0.00 | H |
| ATOM | 328 | 2HD3 | LYS | 21 | 19.548 | -8.085  | 1.320  | 1.00 | 0.00 | H |
| ATOM | 329 | 2HE3 | LYS | 21 | 17.203 | -8.632  | -0.480 | 1.00 | 0.00 | H |
| ATOM | 330 | 1HZ  | LYS | 21 | 17.472 | -9.141  | 2.356  | 1.00 | 0.00 | H |
| ATOM | 331 | 2HZ  | LYS | 21 | 16.343 | -9.743  | 1.248  | 1.00 | 0.00 | H |
| ATOM | 332 | 3HZ  | LYS | 21 | 16.124 | -8.211  | 1.929  | 1.00 | 0.00 | H |
| ATOM | 333 | HB2  | LYS | 21 | 21.316 | -9.084  | -2.025 | 1.00 | 0.00 | H |
| ATOM | 334 | HG2  | LYS | 21 | 20.144 | -7.309  | -0.738 | 1.00 | 0.00 | H |
| ATOM | 335 | HD2  | LYS | 21 | 19.149 | -9.716  | 0.734  | 1.00 | 0.00 | H |
| ATOM | 336 | HE2  | LYS | 21 | 17.496 | -7.200  | 0.535  | 1.00 | 0.00 | H |
| ATOM | 337 | N    | ASP | 22 | 24.087 | -9.621  | -1.334 | 1.00 | 0.00 | N |
| ATOM | 338 | CA   | ASP | 22 | 25.224 | -10.440 | -1.737 | 1.00 | 0.00 | C |
| ATOM | 339 | C    | ASP | 22 | 26.145 | -10.714 | -0.552 | 1.00 | 0.00 | C |
| ATOM | 340 | O    | ASP | 22 | 26.621 | -11.832 | -0.368 | 1.00 | 0.00 | O |
| ATOM | 341 | CB   | ASP | 22 | 26.004 | -9.750  | -2.857 | 1.00 | 0.00 | C |
| ATOM | 342 | CG   | ASP | 22 | 25.097 | -9.179  | -3.928 | 1.00 | 0.00 | C |
| ATOM | 343 | OD1  | ASP | 22 | 24.018 | -9.760  | -4.164 | 1.00 | 0.00 | O |
| ATOM | 344 | OD2  | ASP | 22 | 25.466 | -8.149  | -4.533 | 1.00 | 0.00 | O |
| ATOM | 345 | H    | ASP | 22 | 23.918 | -8.774  | -1.797 | 1.00 | 0.00 | H |
| ATOM | 346 | HA   | ASP | 22 | 24.841 | -11.379 | -2.105 | 1.00 | 0.00 | H |
| ATOM | 347 | 2HB3 | ASP | 22 | 26.670 | -10.464 | -3.317 | 1.00 | 0.00 | H |
| ATOM | 348 | HB2  | ASP | 22 | 26.578 | -8.920  | -2.443 | 1.00 | 0.00 | H |
| ATOM | 349 | N    | GLY | 23 | 26.391 | -9.682  | 0.250  | 1.00 | 0.00 | N |
| ATOM | 350 | CA   | GLY | 23 | 27.256 | -9.832  | 1.406  | 1.00 | 0.00 | C |
| ATOM | 351 | C    | GLY | 23 | 28.710 | -9.545  | 1.086  | 1.00 | 0.00 | C |
| ATOM | 352 | O    | GLY | 23 | 29.596 | -10.314 | 1.455  | 1.00 | 0.00 | O |
| ATOM | 353 | H    | GLY | 23 | 25.983 | -8.812  | 0.055  | 1.00 | 0.00 | H |
| ATOM | 354 | 2HA  | GLY | 23 | 26.927 | -9.151  | 2.178  | 1.00 | 0.00 | H |
| ATOM | 355 | 3HA  | GLY | 23 | 27.174 | -10.843 | 1.774  | 1.00 | 0.00 | H |
| ATOM | 356 | N    | ASP | 24 | 28.953 | -8.436  | 0.396  | 1.00 | 0.00 | N |
| ATOM | 357 | CA   | ASP | 24 | 30.307 | -8.050  | 0.023  | 1.00 | 0.00 | C |
| ATOM | 358 | C    | ASP | 24 | 30.632 | -6.647  | 0.530  | 1.00 | 0.00 | C |
| ATOM | 359 | O    | ASP | 24 | 31.698 | -6.410  | 1.093  | 1.00 | 0.00 | O |
| ATOM | 360 | CB   | ASP | 24 | 30.482 | -8.110  | -1.495 | 1.00 | 0.00 | C |
| ATOM | 361 | CG   | ASP | 24 | 29.479 | -7.240  | -2.226 | 1.00 | 0.00 | C |
| ATOM | 362 | OD1  | ASP | 24 | 28.271 | -7.352  | -1.932 | 1.00 | 0.00 | O |
| ATOM | 363 | OD2  | ASP | 24 | 29.902 | -6.447  | -3.094 | 1.00 | 0.00 | O |
| ATOM | 364 | H    | ASP | 24 | 28.202 | -7.864  | 0.129  | 1.00 | 0.00 | H |
| ATOM | 365 | HA   | ASP | 24 | 30.991 | -8.750  | 0.483  | 1.00 | 0.00 | H |

|      |     |      |     |    |        |        |         |      |      |   |
|------|-----|------|-----|----|--------|--------|---------|------|------|---|
| ATOM | 366 | 2HB3 | ASP | 24 | 30.354 | -9.129 | -1.825  | 1.00 | 0.00 | H |
| ATOM | 367 | HB2  | ASP | 24 | 31.477 | -7.756 | -1.761  | 1.00 | 0.00 | H |
| ATOM | 368 | N    | GLY | 25 | 29.702 | -5.720 | 0.324   | 1.00 | 0.00 | N |
| ATOM | 369 | CA   | GLY | 25 | 29.906 | -4.352 | 0.764   | 1.00 | 0.00 | C |
| ATOM | 370 | C    | GLY | 25 | 29.521 | -3.338 | -0.296  | 1.00 | 0.00 | C |
| ATOM | 371 | O    | GLY | 25 | 30.077 | -2.241 | -0.348  | 1.00 | 0.00 | O |
| ATOM | 372 | H    | GLY | 25 | 28.870 | -5.968 | -0.133  | 1.00 | 0.00 | H |
| ATOM | 373 | 2HA  | GLY | 25 | 29.314 | -4.177 | 1.647   | 1.00 | 0.00 | H |
| ATOM | 374 | 3HA  | GLY | 25 | 30.950 | -4.218 | 1.009   | 1.00 | 0.00 | H |
| ATOM | 375 | N    | THR | 26 | 28.565 | -3.706 | -1.143  | 1.00 | 0.00 | N |
| ATOM | 376 | CA   | THR | 26 | 28.107 | -2.823 | -2.209  | 1.00 | 0.00 | C |
| ATOM | 377 | C    | THR | 26 | 26.610 | -2.980 | -2.448  | 1.00 | 0.00 | C |
| ATOM | 378 | O    | THR | 26 | 25.979 | -3.893 | -1.912  | 1.00 | 0.00 | O |
| ATOM | 379 | CB   | THR | 26 | 28.857 | -3.093 | -3.526  | 1.00 | 0.00 | C |
| ATOM | 380 | OG1  | THR | 26 | 28.628 | -4.441 | -3.951  | 1.00 | 0.00 | O |
| ATOM | 381 | CG2  | THR | 26 | 30.350 | -2.854 | -3.356  | 1.00 | 0.00 | C |
| ATOM | 382 | H    | THR | 26 | 28.160 | -4.593 | -1.051  | 1.00 | 0.00 | H |
| ATOM | 383 | HA   | THR | 26 | 28.308 | -1.803 | -1.907  | 1.00 | 0.00 | H |
| ATOM | 384 | HB   | THR | 26 | 28.483 | -2.417 | -4.281  | 1.00 | 0.00 | H |
| ATOM | 385 | 1HG  | THR | 26 | 29.228 | -4.655 | -4.670  | 1.00 | 0.00 | H |
| ATOM | 386 | 1HG2 | THR | 26 | 30.894 | -3.468 | -4.059  | 1.00 | 0.00 | H |
| ATOM | 387 | 2HG2 | THR | 26 | 30.644 | -3.112 | -2.350  | 1.00 | 0.00 | H |
| ATOM | 388 | 3HG2 | THR | 26 | 30.570 | -1.814 | -3.542  | 1.00 | 0.00 | H |
| ATOM | 389 | N    | ILE | 27 | 26.047 | -2.087 | -3.255  | 1.00 | 0.00 | N |
| ATOM | 390 | CA   | ILE | 27 | 24.624 | -2.129 | -3.566  | 1.00 | 0.00 | C |
| ATOM | 391 | C    | ILE | 27 | 24.373 | -1.823 | -5.039  | 1.00 | 0.00 | C |
| ATOM | 392 | O    | ILE | 27 | 24.961 | -0.898 | -5.600  | 1.00 | 0.00 | O |
| ATOM | 393 | CB   | ILE | 27 | 23.827 | -1.132 | -2.703  | 1.00 | 0.00 | C |
| ATOM | 394 | CG2  | ILE | 27 | 22.337 | -1.262 | -2.982  | 1.00 | 0.00 | C |
| ATOM | 395 | CG1  | ILE | 27 | 24.120 | -1.363 | -1.220  | 1.00 | 0.00 | C |
| ATOM | 396 | CD1  | ILE | 27 | 23.853 | -0.150 | -0.355  | 1.00 | 0.00 | C |
| ATOM | 397 | H    | ILE | 27 | 26.601 | -1.384 | -3.652  | 1.00 | 0.00 | H |
| ATOM | 398 | HA   | ILE | 27 | 24.266 | -3.127 | -3.351  | 1.00 | 0.00 | H |
| ATOM | 399 | HB   | ILE | 27 | 24.135 | -0.133 | -2.972  | 1.00 | 0.00 | H |
| ATOM | 400 | 1HG2 | ILE | 27 | 21.849 | -1.711 | -2.131  | 1.00 | 0.00 | H |
| ATOM | 401 | 2HG2 | ILE | 27 | 21.919 | -0.281 | -3.159  | 1.00 | 0.00 | H |
| ATOM | 402 | 3HG2 | ILE | 27 | 22.186 | -1.880 | -3.853  | 1.00 | 0.00 | H |
| ATOM | 403 | 2HG3 | ILE | 27 | 25.158 | -1.634 | -1.103  | 1.00 | 0.00 | H |
| ATOM | 404 | 1HD1 | ILE | 27 | 24.447 | 0.680  | -0.708  | 1.00 | 0.00 | H |
| ATOM | 405 | 2HD1 | ILE | 27 | 22.807 | 0.107  | -0.406  | 1.00 | 0.00 | H |
| ATOM | 406 | 3HD1 | ILE | 27 | 24.119 | -0.372 | 0.669   | 1.00 | 0.00 | H |
| ATOM | 407 | HG2  | ILE | 27 | 23.481 | -2.163 | -0.843  | 1.00 | 0.00 | H |
| ATOM | 408 | N    | THR | 28 | 23.494 | -2.604 | -5.659  | 1.00 | 0.00 | N |
| ATOM | 409 | CA   | THR | 28 | 23.165 | -2.415 | -7.067  | 1.00 | 0.00 | C |
| ATOM | 410 | C    | THR | 28 | 21.658 | -2.474 | -7.291  | 1.00 | 0.00 | C |
| ATOM | 411 | O    | THR | 28 | 20.890 | -2.734 | -6.364  | 1.00 | 0.00 | O |
| ATOM | 412 | CB   | THR | 28 | 23.845 | -3.478 | -7.950  | 1.00 | 0.00 | C |
| ATOM | 413 | OG1  | THR | 28 | 23.587 | -3.204 | -9.331  | 1.00 | 0.00 | O |
| ATOM | 414 | CG2  | THR | 28 | 23.347 | -4.872 | -7.602  | 1.00 | 0.00 | C |
| ATOM | 415 | H    | THR | 28 | 23.057 | -3.324 | -5.159  | 1.00 | 0.00 | H |
| ATOM | 416 | HA   | THR | 28 | 23.526 | -1.442 | -7.366  | 1.00 | 0.00 | H |
| ATOM | 417 | HB   | THR | 28 | 24.912 | -3.438 | -7.776  | 1.00 | 0.00 | H |
| ATOM | 418 | 1HG  | THR | 28 | 23.945 | -3.914 | -9.872  | 1.00 | 0.00 | H |
| ATOM | 419 | 1HG2 | THR | 28 | 23.880 | -5.239 | -6.738  | 1.00 | 0.00 | H |
| ATOM | 420 | 2HG2 | THR | 28 | 23.514 | -5.533 | -8.438  | 1.00 | 0.00 | H |
| ATOM | 421 | 3HG2 | THR | 28 | 22.291 | -4.831 | -7.383  | 1.00 | 0.00 | H |
| ATOM | 422 | N    | THR | 29 | 21.239 | -2.229 | -8.529  | 1.00 | 0.00 | N |
| ATOM | 423 | CA   | THR | 29 | 19.824 | -2.254 | -8.877  | 1.00 | 0.00 | C |
| ATOM | 424 | C    | THR | 29 | 19.147 | -3.506 | -8.334  | 1.00 | 0.00 | C |
| ATOM | 425 | O    | THR | 29 | 17.995 | -3.464 | -7.895  | 1.00 | 0.00 | O |
| ATOM | 426 | CB   | THR | 29 | 19.617 | -2.192 | -10.402 | 1.00 | 0.00 | C |
| ATOM | 427 | OG1  | THR | 29 | 20.093 | -3.398 | -11.009 | 1.00 | 0.00 | O |
| ATOM | 428 | CG2  | THR | 29 | 20.344 | -0.996 | -10.998 | 1.00 | 0.00 | C |
| ATOM | 429 | H    | THR | 29 | 21.899 | -2.026 | -9.226  | 1.00 | 0.00 | H |
| ATOM | 430 | HA   | THR | 29 | 19.358 | -1.384 | -8.435  | 1.00 | 0.00 | H |
| ATOM | 431 | HB   | THR | 29 | 18.559 | -2.090 | -10.601 | 1.00 | 0.00 | H |
| ATOM | 432 | 1HG  | THR | 29 | 19.951 | -4.136 | -10.411 | 1.00 | 0.00 | H |
| ATOM | 433 | 1HG2 | THR | 29 | 20.120 | -0.928 | -12.052 | 1.00 | 0.00 | H |
| ATOM | 434 | 2HG2 | THR | 29 | 21.408 | -1.119 | -10.864 | 1.00 | 0.00 | H |
| ATOM | 435 | 3HG2 | THR | 29 | 20.020 | -0.094 | -10.501 | 1.00 | 0.00 | H |
| ATOM | 436 | N    | LYS | 30 | 19.867 | -4.622 | -8.364  | 1.00 | 0.00 | N |
| ATOM | 437 | CA   | LYS | 30 | 19.337 | -5.889 | -7.874  | 1.00 | 0.00 | C |
| ATOM | 438 | C    | LYS | 30 | 19.014 | -5.804 | -6.384  | 1.00 | 0.00 | C |
| ATOM | 439 | O    | LYS | 30 | 17.949 | -6.237 | -5.945  | 1.00 | 0.00 | O |
| ATOM | 440 | CB   | LYS | 30 | 20.339 | -7.018 | -8.125  | 1.00 | 0.00 | C |
| ATOM | 441 | CG   | LYS | 30 | 19.927 | -8.345 | -7.513  | 1.00 | 0.00 | C |
| ATOM | 442 | CD   | LYS | 30 | 18.899 | -9.062 | -8.371  | 1.00 | 0.00 | C |

|      |     |      |     |    |        |         |         |      |      |   |
|------|-----|------|-----|----|--------|---------|---------|------|------|---|
| ATOM | 443 | CE   | LYS | 30 | 19.561 | -9.853  | -9.489  | 1.00 | 0.00 | C |
| ATOM | 444 | NZ   | LYS | 30 | 18.576 | -10.290 | -10.517 | 1.00 | 0.00 | N |
| ATOM | 445 | H    | LYS | 30 | 20.778 | -4.594  | -8.726  | 1.00 | 0.00 | H |
| ATOM | 446 | HA   | LYS | 30 | 18.427 | -6.101  | -8.414  | 1.00 | 0.00 | H |
| ATOM | 447 | 2HB3 | LYS | 30 | 21.294 | -6.733  | -7.707  | 1.00 | 0.00 | H |
| ATOM | 448 | 2HG3 | LYS | 30 | 19.504 | -8.164  | -6.534  | 1.00 | 0.00 | H |
| ATOM | 449 | 2HD3 | LYS | 30 | 18.233 | -8.329  | -8.806  | 1.00 | 0.00 | H |
| ATOM | 450 | 2HE3 | LYS | 30 | 20.036 | -10.724 | -9.064  | 1.00 | 0.00 | H |
| ATOM | 451 | 1HZ  | LYS | 30 | 18.990 | -10.206 | -11.467 | 1.00 | 0.00 | H |
| ATOM | 452 | 2HZ  | LYS | 30 | 17.723 | -9.701  | -10.468 | 1.00 | 0.00 | H |
| ATOM | 453 | 3HZ  | LYS | 30 | 18.307 | -11.282 | -10.356 | 1.00 | 0.00 | H |
| ATOM | 454 | HB2  | LYS | 30 | 20.430 | -7.192  | -9.197  | 1.00 | 0.00 | H |
| ATOM | 455 | HG2  | LYS | 30 | 20.801 | -8.992  | -7.426  | 1.00 | 0.00 | H |
| ATOM | 456 | HD2  | LYS | 30 | 18.334 | -9.759  | -7.755  | 1.00 | 0.00 | H |
| ATOM | 457 | HE2  | LYS | 30 | 20.300 | -9.227  | -9.990  | 1.00 | 0.00 | H |
| ATOM | 458 | N    | GLU | 31 | 19.941 | -5.242  | -5.615  | 1.00 | 0.00 | N |
| ATOM | 459 | CA   | GLU | 31 | 19.753 | -5.101  | -4.175  | 1.00 | 0.00 | C |
| ATOM | 460 | C    | GLU | 31 | 18.846 | -3.916  | -3.858  | 1.00 | 0.00 | C |
| ATOM | 461 | O    | GLU | 31 | 17.751 | -4.084  | -3.316  | 1.00 | 0.00 | O |
| ATOM | 462 | CB   | GLU | 31 | 21.103 | -4.921  | -3.478  | 1.00 | 0.00 | C |
| ATOM | 463 | CG   | GLU | 31 | 21.995 | -6.150  | -3.554  | 1.00 | 0.00 | C |
| ATOM | 464 | CD   | GLU | 31 | 23.471 | -5.801  | -3.516  | 1.00 | 0.00 | C |
| ATOM | 465 | OE1  | GLU | 31 | 23.996 | -5.329  | -4.546  | 1.00 | 0.00 | O |
| ATOM | 466 | OE2  | GLU | 31 | 24.101 | -6.002  | -2.457  | 1.00 | 0.00 | O |
| ATOM | 467 | H    | GLU | 31 | 20.769 | -4.917  | -6.024  | 1.00 | 0.00 | H |
| ATOM | 468 | HA   | GLU | 31 | 19.287 | -6.003  | -3.810  | 1.00 | 0.00 | H |
| ATOM | 469 | 2HB3 | GLU | 31 | 20.931 | -4.694  | -2.437  | 1.00 | 0.00 | H |
| ATOM | 470 | 2HG3 | GLU | 31 | 21.789 | -6.672  | -4.479  | 1.00 | 0.00 | H |
| ATOM | 471 | HB2  | GLU | 31 | 21.655 | -4.111  | -3.955  | 1.00 | 0.00 | H |
| ATOM | 472 | HG2  | GLU | 31 | 21.794 | -6.800  | -2.702  | 1.00 | 0.00 | H |
| ATOM | 473 | N    | LEU | 32 | 19.303 | -2.717  | -4.201  | 1.00 | 0.00 | N |
| ATOM | 474 | CA   | LEU | 32 | 18.533 | -1.503  | -3.954  | 1.00 | 0.00 | C |
| ATOM | 475 | C    | LEU | 32 | 17.110 | -1.645  | -4.486  | 1.00 | 0.00 | C |
| ATOM | 476 | O    | LEU | 32 | 16.154 | -1.200  | -3.852  | 1.00 | 0.00 | O |
| ATOM | 477 | CB   | LEU | 32 | 19.217 | -0.302  | -4.608  | 1.00 | 0.00 | C |
| ATOM | 478 | CG   | LEU | 32 | 18.479 | 1.033   | -4.494  | 1.00 | 0.00 | C |
| ATOM | 479 | CD1  | LEU | 32 | 18.397 | 1.476   | -3.043  | 1.00 | 0.00 | C |
| ATOM | 480 | CD2  | LEU | 32 | 19.165 | 2.097   | -5.340  | 1.00 | 0.00 | C |
| ATOM | 481 | H    | LEU | 32 | 20.180 | -2.646  | -4.633  | 1.00 | 0.00 | H |
| ATOM | 482 | HA   | LEU | 32 | 18.493 | -1.349  | -2.887  | 1.00 | 0.00 | H |
| ATOM | 483 | 2HB3 | LEU | 32 | 19.341 | -0.523  | -5.660  | 1.00 | 0.00 | H |
| ATOM | 484 | HG   | LEU | 32 | 17.470 | 0.912   | -4.862  | 1.00 | 0.00 | H |
| ATOM | 485 | 1HD1 | LEU | 32 | 18.405 | 0.607   | -2.401  | 1.00 | 0.00 | H |
| ATOM | 486 | 2HD1 | LEU | 32 | 17.484 | 2.032   | -2.885  | 1.00 | 0.00 | H |
| ATOM | 487 | 3HD1 | LEU | 32 | 19.245 | 2.104   | -2.808  | 1.00 | 0.00 | H |
| ATOM | 488 | 1HD2 | LEU | 32 | 19.995 | 2.516   | -4.788  | 1.00 | 0.00 | H |
| ATOM | 489 | 2HD2 | LEU | 32 | 18.459 | 2.879   | -5.576  | 1.00 | 0.00 | H |
| ATOM | 490 | 3HD2 | LEU | 32 | 19.530 | 1.649   | -6.252  | 1.00 | 0.00 | H |
| ATOM | 491 | HB2  | LEU | 32 | 20.180 | -0.124  | -4.128  | 1.00 | 0.00 | H |
| ATOM | 492 | N    | GLY | 33 | 16.977 | -2.270  | -5.650  | 1.00 | 0.00 | N |
| ATOM | 493 | CA   | GLY | 33 | 15.667 | -2.459  | -6.246  | 1.00 | 0.00 | C |
| ATOM | 494 | C    | GLY | 33 | 14.835 | -3.481  | -5.497  | 1.00 | 0.00 | C |
| ATOM | 495 | O    | GLY | 33 | 13.612 | -3.523  | -5.641  | 1.00 | 0.00 | O |
| ATOM | 496 | H    | GLY | 33 | 17.775 | -2.603  | -6.112  | 1.00 | 0.00 | H |
| ATOM | 497 | 2HA  | GLY | 33 | 15.144 | -1.515  | -6.246  | 1.00 | 0.00 | H |
| ATOM | 498 | 3HA  | GLY | 33 | 15.792 | -2.792  | -7.266  | 1.00 | 0.00 | H |
| ATOM | 499 | N    | THR | 34 | 15.497 | -4.311  | -4.696  | 1.00 | 0.00 | N |
| ATOM | 500 | CA   | THR | 34 | 14.810 | -5.341  | -3.925  | 1.00 | 0.00 | C |
| ATOM | 501 | C    | THR | 34 | 14.196 | -4.758  | -2.658  | 1.00 | 0.00 | C |
| ATOM | 502 | O    | THR | 34 | 13.209 | -5.280  | -2.139  | 1.00 | 0.00 | O |
| ATOM | 503 | CB   | THR | 34 | 15.766 | -6.485  | -3.542  | 1.00 | 0.00 | C |
| ATOM | 504 | OG1  | THR | 34 | 15.062 | -7.733  | -3.543  | 1.00 | 0.00 | O |
| ATOM | 505 | CG2  | THR | 34 | 16.377 | -6.242  | -2.170  | 1.00 | 0.00 | C |
| ATOM | 506 | H    | THR | 34 | 16.471 | -4.228  | -4.624  | 1.00 | 0.00 | H |
| ATOM | 507 | HA   | THR | 34 | 14.023 | -5.748  | -4.542  | 1.00 | 0.00 | H |
| ATOM | 508 | HB   | THR | 34 | 16.561 | -6.529  | -4.271  | 1.00 | 0.00 | H |
| ATOM | 509 | 1HG  | THR | 34 | 14.675 | -7.882  | -2.676  | 1.00 | 0.00 | H |
| ATOM | 510 | 1HG2 | THR | 34 | 17.374 | -6.656  | -2.142  | 1.00 | 0.00 | H |
| ATOM | 511 | 2HG2 | THR | 34 | 15.769 | -6.719  | -1.416  | 1.00 | 0.00 | H |
| ATOM | 512 | 3HG2 | THR | 34 | 16.423 | -5.181  | -1.978  | 1.00 | 0.00 | H |
| ATOM | 513 | N    | VAL | 35 | 14.786 | -3.675  | -2.164  | 1.00 | 0.00 | N |
| ATOM | 514 | CA   | VAL | 35 | 14.295 | -3.020  | -0.955  | 1.00 | 0.00 | C |
| ATOM | 515 | C    | VAL | 35 | 13.441 | -1.805  | -1.297  | 1.00 | 0.00 | C |
| ATOM | 516 | O    | VAL | 35 | 12.455 | -1.517  | -0.621  | 1.00 | 0.00 | O |
| ATOM | 517 | CB   | VAL | 35 | 15.457 | -2.580  | -0.045  | 1.00 | 0.00 | C |
| ATOM | 518 | CG1  | VAL | 35 | 15.049 | -1.380  | 0.794   | 1.00 | 0.00 | C |
| ATOM | 519 | CG2  | VAL | 35 | 15.905 | -3.733  | 0.841   | 1.00 | 0.00 | C |

|      |     |      |     |    |        |        |        |      |      |   |
|------|-----|------|-----|----|--------|--------|--------|------|------|---|
| ATOM | 520 | H    | VAL | 35 | 15.569 | -3.307 | -2.621 | 1.00 | 0.00 | H |
| ATOM | 521 | HA   | VAL | 35 | 13.690 | -3.734 | -0.413 | 1.00 | 0.00 | H |
| ATOM | 522 | HB   | VAL | 35 | 16.288 | -2.290 | -0.670 | 1.00 | 0.00 | H |
| ATOM | 523 | 1HG1 | VAL | 35 | 14.020 | -1.491 | 1.106  | 1.00 | 0.00 | H |
| ATOM | 524 | 2HG1 | VAL | 35 | 15.686 | -1.316 | 1.667  | 1.00 | 0.00 | H |
| ATOM | 525 | 3HG1 | VAL | 35 | 15.152 | -0.478 | 0.207  | 1.00 | 0.00 | H |
| ATOM | 526 | 1HG2 | VAL | 35 | 15.042 | -4.192 | 1.298  | 1.00 | 0.00 | H |
| ATOM | 527 | 2HG2 | VAL | 35 | 16.427 | -4.467 | 0.243  | 1.00 | 0.00 | H |
| ATOM | 528 | 3HG2 | VAL | 35 | 16.568 | -3.361 | 1.609  | 1.00 | 0.00 | H |
| ATOM | 529 | N    | MET | 36 | 13.829 | -1.095 | -2.352 | 1.00 | 0.00 | N |
| ATOM | 530 | CA   | MET | 36 | 13.097 | 0.091  | -2.784 | 1.00 | 0.00 | C |
| ATOM | 531 | C    | MET | 36 | 11.654 | -0.260 | -3.136 | 1.00 | 0.00 | C |
| ATOM | 532 | O    | MET | 36 | 10.728 | 0.483  | -2.806 | 1.00 | 0.00 | O |
| ATOM | 533 | CB   | MET | 36 | 13.787 | 0.729  | -3.991 | 1.00 | 0.00 | C |
| ATOM | 534 | CG   | MET | 36 | 14.984 | 1.589  | -3.622 | 1.00 | 0.00 | C |
| ATOM | 535 | SD   | MET | 36 | 15.252 | 2.942  | -4.782 | 1.00 | 0.00 | S |
| ATOM | 536 | CE   | MET | 36 | 13.726 | 3.860  | -4.589 | 1.00 | 0.00 | C |
| ATOM | 537 | H    | MET | 36 | 14.624 | -1.374 | -2.852 | 1.00 | 0.00 | H |
| ATOM | 538 | HA   | MET | 36 | 13.096 | 0.794  | -1.967 | 1.00 | 0.00 | H |
| ATOM | 539 | 2HB3 | MET | 36 | 13.073 | 1.351  | -4.513 | 1.00 | 0.00 | H |
| ATOM | 540 | 2HG3 | MET | 36 | 15.866 | 0.965  | -3.606 | 1.00 | 0.00 | H |
| ATOM | 541 | 1HE  | MET | 36 | 12.991 | 3.488  | -5.285 | 1.00 | 0.00 | H |
| ATOM | 542 | 2HE  | MET | 36 | 13.359 | 3.741  | -3.579 | 1.00 | 0.00 | H |
| ATOM | 543 | 3HE  | MET | 36 | 13.910 | 4.908  | -4.783 | 1.00 | 0.00 | H |
| ATOM | 544 | HB2  | MET | 36 | 14.162 | -0.052 | -4.651 | 1.00 | 0.00 | H |
| ATOM | 545 | HG2  | MET | 36 | 14.821 | 2.038  | -2.641 | 1.00 | 0.00 | H |
| ATOM | 546 | N    | ARG | 37 | 11.471 | -1.393 | -3.804 | 1.00 | 0.00 | N |
| ATOM | 547 | CA   | ARG | 37 | 10.140 | -1.840 | -4.201 | 1.00 | 0.00 | C |
| ATOM | 548 | C    | ARG | 37 | 9.343  | -2.316 | -2.989 | 1.00 | 0.00 | C |
| ATOM | 549 | O    | ARG | 37 | 8.118  | -2.414 | -3.042 | 1.00 | 0.00 | O |
| ATOM | 550 | CB   | ARG | 37 | 10.243 | -2.964 | -5.232 | 1.00 | 0.00 | C |
| ATOM | 551 | CG   | ARG | 37 | 11.073 | -4.148 | -4.762 | 1.00 | 0.00 | C |
| ATOM | 552 | CD   | ARG | 37 | 10.247 | -5.105 | -3.918 | 1.00 | 0.00 | C |
| ATOM | 553 | NE   | ARG | 37 | 10.709 | -6.487 | -4.048 | 1.00 | 0.00 | N |
| ATOM | 554 | CZ   | ARG | 37 | 9.928  | -7.543 | -3.850 | 1.00 | 0.00 | C |
| ATOM | 555 | NH1  | ARG | 37 | 8.655  | -7.380 | -3.515 | 1.00 | 0.00 | N |
| ATOM | 556 | NH2  | ARG | 37 | 10.422 | -8.768 | -3.986 | 1.00 | 0.00 | N |
| ATOM | 557 | H    | ARG | 37 | 12.248 | -1.943 | -4.038 | 1.00 | 0.00 | H |
| ATOM | 558 | HA   | ARG | 37 | 9.628  | -1.000 | -4.647 | 1.00 | 0.00 | H |
| ATOM | 559 | 2HB3 | ARG | 37 | 10.692 | -2.572 | -6.131 | 1.00 | 0.00 | H |
| ATOM | 560 | 2HG3 | ARG | 37 | 11.900 | -3.783 | -4.172 | 1.00 | 0.00 | H |
| ATOM | 561 | 2HD3 | ARG | 37 | 9.217  | -5.049 | -4.235 | 1.00 | 0.00 | H |
| ATOM | 562 | HE   | ARG | 37 | 11.646 | -6.630 | -4.293 | 1.00 | 0.00 | H |
| ATOM | 563 | 1HH1 | ARG | 37 | 8.282  | -6.458 | -3.412 | 1.00 | 0.00 | H |
| ATOM | 564 | 2HH1 | ARG | 37 | 8.071  | -8.178 | -3.367 | 1.00 | 0.00 | H |
| ATOM | 565 | 1HH2 | ARG | 37 | 11.380 | -8.896 | -4.239 | 1.00 | 0.00 | H |
| ATOM | 566 | 2HH2 | ARG | 37 | 9.834  | -9.563 | -3.838 | 1.00 | 0.00 | H |
| ATOM | 567 | HB2  | ARG | 37 | 9.248  | -3.356 | -5.445 | 1.00 | 0.00 | H |
| ATOM | 568 | HG2  | ARG | 37 | 11.445 | -4.697 | -5.626 | 1.00 | 0.00 | H |
| ATOM | 569 | HD2  | ARG | 37 | 10.333 | -4.829 | -2.866 | 1.00 | 0.00 | H |
| ATOM | 570 | N    | SER | 38 | 10.048 | -2.611 | -1.902 | 1.00 | 0.00 | N |
| ATOM | 571 | CA   | SER | 38 | 9.408  | -3.080 | -0.679 | 1.00 | 0.00 | C |
| ATOM | 572 | C    | SER | 38 | 8.543  | -1.985 | -0.065 | 1.00 | 0.00 | C |
| ATOM | 573 | O    | SER | 38 | 7.521  | -2.264 | 0.565  | 1.00 | 0.00 | O |
| ATOM | 574 | CB   | SER | 38 | 10.462 | -3.541 | 0.329  | 1.00 | 0.00 | C |
| ATOM | 575 | OG   | SER | 38 | 11.314 | -4.523 | -0.235 | 1.00 | 0.00 | O |
| ATOM | 576 | H    | SER | 38 | 11.023 | -2.512 | -1.924 | 1.00 | 0.00 | H |
| ATOM | 577 | HA   | SER | 38 | 8.779  | -3.917 | -0.937 | 1.00 | 0.00 | H |
| ATOM | 578 | 2HB3 | SER | 38 | 9.969  | -3.962 | 1.194  | 1.00 | 0.00 | H |
| ATOM | 579 | HG   | SER | 38 | 10.820 | -5.051 | -0.866 | 1.00 | 0.00 | H |
| ATOM | 580 | HB2  | SER | 38 | 11.071 | -2.690 | 0.632  | 1.00 | 0.00 | H |
| ATOM | 581 | N    | LEU | 39 | 8.958  | -0.737 | -0.250 | 1.00 | 0.00 | N |
| ATOM | 582 | CA   | LEU | 39 | 8.221  | 0.402  | 0.286  | 1.00 | 0.00 | C |
| ATOM | 583 | C    | LEU | 39 | 7.091  | 0.810  | -0.652 | 1.00 | 0.00 | C |
| ATOM | 584 | O    | LEU | 39 | 5.995  | 1.155  | -0.209 | 1.00 | 0.00 | O |
| ATOM | 585 | CB   | LEU | 39 | 9.166  | 1.583  | 0.510  | 1.00 | 0.00 | C |
| ATOM | 586 | CG   | LEU | 39 | 10.123 | 1.465  | 1.697  | 1.00 | 0.00 | C |
| ATOM | 587 | CD1  | LEU | 39 | 11.130 | 2.603  | 1.687  | 1.00 | 0.00 | C |
| ATOM | 588 | CD2  | LEU | 39 | 9.347  | 1.449  | 3.006  | 1.00 | 0.00 | C |
| ATOM | 589 | H    | LEU | 39 | 9.778  | -0.578 | -0.760 | 1.00 | 0.00 | H |
| ATOM | 590 | HA   | LEU | 39 | 7.798  | 0.105  | 1.233  | 1.00 | 0.00 | H |
| ATOM | 591 | 2HB3 | LEU | 39 | 8.559  | 2.468  | 0.660  | 1.00 | 0.00 | H |
| ATOM | 592 | HG   | LEU | 39 | 10.668 | 0.535  | 1.618  | 1.00 | 0.00 | H |
| ATOM | 593 | 1HD1 | LEU | 39 | 11.492 | 2.773  | 2.689  | 1.00 | 0.00 | H |
| ATOM | 594 | 2HD1 | LEU | 39 | 10.656 | 3.501  | 1.319  | 1.00 | 0.00 | H |
| ATOM | 595 | 3HD1 | LEU | 39 | 11.958 | 2.345  | 1.043  | 1.00 | 0.00 | H |
| ATOM | 596 | 1HD2 | LEU | 39 | 8.288  | 1.412  | 2.797  | 1.00 | 0.00 | H |

|      |     |      |     |    |        |        |         |      |      |   |
|------|-----|------|-----|----|--------|--------|---------|------|------|---|
| ATOM | 597 | 2HD2 | LEU | 39 | 9.572  | 2.342  | 3.568   | 1.00 | 0.00 | H |
| ATOM | 598 | 3HD2 | LEU | 39 | 9.630  | 0.579  | 3.582   | 1.00 | 0.00 | H |
| ATOM | 599 | HB2  | LEU | 39 | 9.821  | 1.696  | -0.354  | 1.00 | 0.00 | H |
| ATOM | 600 | N    | GLY | 40 | 7.363  | 0.766  | -1.953  | 1.00 | 0.00 | N |
| ATOM | 601 | CA   | GLY | 40 | 6.357  | 1.131  | -2.933  | 1.00 | 0.00 | C |
| ATOM | 602 | C    | GLY | 40 | 6.885  | 2.104  | -3.971  | 1.00 | 0.00 | C |
| ATOM | 603 | O    | GLY | 40 | 6.161  | 2.993  | -4.420  | 1.00 | 0.00 | O |
| ATOM | 604 | H    | GLY | 40 | 8.253  | 0.483  | -2.249  | 1.00 | 0.00 | H |
| ATOM | 605 | 2HA  | GLY | 40 | 6.017  | 0.237  | -3.435  | 1.00 | 0.00 | H |
| ATOM | 606 | 3HA  | GLY | 40 | 5.521  | 1.585  | -2.423  | 1.00 | 0.00 | H |
| ATOM | 607 | N    | GLN | 41 | 8.147  | 1.935  | -4.348  | 1.00 | 0.00 | N |
| ATOM | 608 | CA   | GLN | 41 | 8.771  | 2.809  | -5.337  | 1.00 | 0.00 | C |
| ATOM | 609 | C    | GLN | 41 | 8.802  | 2.143  | -6.709  | 1.00 | 0.00 | C |
| ATOM | 610 | O    | GLN | 41 | 8.541  | 2.784  | -7.724  | 1.00 | 0.00 | O |
| ATOM | 611 | CB   | GLN | 41 | 10.192 | 3.172  | -4.902  | 1.00 | 0.00 | C |
| ATOM | 612 | CG   | GLN | 41 | 10.240 | 4.114  | -3.710  | 1.00 | 0.00 | C |
| ATOM | 613 | CD   | GLN | 41 | 9.295  | 5.289  | -3.856  | 1.00 | 0.00 | C |
| ATOM | 614 | OE1  | GLN | 41 | 9.035  | 5.759  | -4.964  | 1.00 | 0.00 | O |
| ATOM | 615 | NE2  | GLN | 41 | 8.773  | 5.774  | -2.735  | 1.00 | 0.00 | N |
| ATOM | 616 | H    | GLN | 41 | 8.671  | 1.209  | -3.953  | 1.00 | 0.00 | H |
| ATOM | 617 | HA   | GLN | 41 | 8.181  | 3.710  | -5.400  | 1.00 | 0.00 | H |
| ATOM | 618 | 2HB3 | GLN | 41 | 10.697 | 3.648  | -5.730  | 1.00 | 0.00 | H |
| ATOM | 619 | 2HG3 | GLN | 41 | 11.247 | 4.491  | -3.607  | 1.00 | 0.00 | H |
| ATOM | 620 | 1HE2 | GLN | 41 | 9.026  | 5.350  | -1.887  | 1.00 | 0.00 | H |
| ATOM | 621 | 2HE2 | GLN | 41 | 8.158  | 6.534  | -2.800  | 1.00 | 0.00 | H |
| ATOM | 622 | HB2  | GLN | 41 | 10.724 | 2.269  | -4.603  | 1.00 | 0.00 | H |
| ATOM | 623 | HG2  | GLN | 41 | 9.944  | 3.577  | -2.808  | 1.00 | 0.00 | H |
| ATOM | 624 | N    | ASN | 42 | 9.119  | 0.852  | -6.728  | 1.00 | 0.00 | N |
| ATOM | 625 | CA   | ASN | 42 | 9.185  | 0.101  | -7.975  | 1.00 | 0.00 | C |
| ATOM | 626 | C    | ASN | 42 | 9.851  | 0.924  | -9.073  | 1.00 | 0.00 | C |
| ATOM | 627 | O    | ASN | 42 | 9.322  | 1.080  | -10.174 | 1.00 | 0.00 | O |
| ATOM | 628 | CB   | ASN | 42 | 7.780  | -0.317 | -8.418  | 1.00 | 0.00 | C |
| ATOM | 629 | CG   | ASN | 42 | 7.363  | -1.652 | -7.833  | 1.00 | 0.00 | C |
| ATOM | 630 | OD1  | ASN | 42 | 7.904  | -2.697 | -8.197  | 1.00 | 0.00 | O |
| ATOM | 631 | ND2  | ASN | 42 | 6.396  | -1.625 | -6.924  | 1.00 | 0.00 | N |
| ATOM | 632 | H    | ASN | 42 | 9.316  | 0.396  | -5.883  | 1.00 | 0.00 | H |
| ATOM | 633 | HA   | ASN | 42 | 9.774  | -0.787 | -7.798  | 1.00 | 0.00 | H |
| ATOM | 634 | 2HB3 | ASN | 42 | 7.754  | -0.392 | -9.494  | 1.00 | 0.00 | H |
| ATOM | 635 | 1HD2 | ASN | 42 | 6.009  | -0.757 | -6.683  | 1.00 | 0.00 | H |
| ATOM | 636 | 2HD2 | ASN | 42 | 6.107  | -2.475 | -6.529  | 1.00 | 0.00 | H |
| ATOM | 637 | HB2  | ASN | 42 | 7.056  | 0.425  | -8.078  | 1.00 | 0.00 | H |
| ATOM | 638 | N    | PRO | 43 | 11.041 | 1.462  | -8.768  | 1.00 | 0.00 | N |
| ATOM | 639 | CA   | PRO | 43 | 11.806 | 2.277  | -9.715  | 1.00 | 0.00 | C |
| ATOM | 640 | C    | PRO | 43 | 12.367 | 1.454  | -10.870 | 1.00 | 0.00 | C |
| ATOM | 641 | O    | PRO | 43 | 12.820 | 0.324  | -10.678 | 1.00 | 0.00 | O |
| ATOM | 642 | CD   | PRO | 43 | 11.730 | 1.316  | -7.475  | 1.00 | 0.00 | C |
| ATOM | 643 | CB   | PRO | 43 | 12.944 | 2.842  | -8.859  | 1.00 | 0.00 | C |
| ATOM | 644 | CG   | PRO | 43 | 13.105 | 1.859  | -7.750  | 1.00 | 0.00 | C |
| ATOM | 645 | HA   | PRO | 43 | 11.215 | 3.090  | -10.110 | 1.00 | 0.00 | H |
| ATOM | 646 | 2HB3 | PRO | 43 | 12.671 | 3.816  | -8.487  | 1.00 | 0.00 | H |
| ATOM | 647 | 2HG3 | PRO | 43 | 13.494 | 2.357  | -6.873  | 1.00 | 0.00 | H |
| ATOM | 648 | 2HD3 | PRO | 43 | 11.241 | 1.901  | -6.709  | 1.00 | 0.00 | H |
| ATOM | 649 | HD2  | PRO | 43 | 11.774 | 0.262  | -7.203  | 1.00 | 0.00 | H |
| ATOM | 650 | HB2  | PRO | 43 | 13.846 | 2.931  | -9.466  | 1.00 | 0.00 | H |
| ATOM | 651 | HG2  | PRO | 43 | 13.761 | 1.045  | -8.059  | 1.00 | 0.00 | H |
| ATOM | 652 | N    | THR | 44 | 12.330 | 2.023  | -12.070 | 1.00 | 0.00 | N |
| ATOM | 653 | CA   | THR | 44 | 12.833 | 1.341  | -13.256 | 1.00 | 0.00 | C |
| ATOM | 654 | C    | THR | 44 | 14.356 | 1.376  | -13.307 | 1.00 | 0.00 | C |
| ATOM | 655 | O    | THR | 44 | 14.991 | 2.177  | -12.619 | 1.00 | 0.00 | O |
| ATOM | 656 | CB   | THR | 44 | 12.273 | 1.969  | -14.546 | 1.00 | 0.00 | C |
| ATOM | 657 | OG1  | THR | 44 | 12.623 | 3.355  | -14.607 | 1.00 | 0.00 | O |
| ATOM | 658 | CG2  | THR | 44 | 10.760 | 1.819  | -14.607 | 1.00 | 0.00 | C |
| ATOM | 659 | H    | THR | 44 | 11.955 | 2.924  | -12.159 | 1.00 | 0.00 | H |
| ATOM | 660 | HA   | THR | 44 | 12.508 | 0.311  | -13.211 | 1.00 | 0.00 | H |
| ATOM | 661 | HB   | THR | 44 | 12.705 | 1.458  | -15.394 | 1.00 | 0.00 | H |
| ATOM | 662 | 1HG  | THR | 44 | 12.769 | 3.608  | -15.522 | 1.00 | 0.00 | H |
| ATOM | 663 | 1HG2 | THR | 44 | 10.407 | 2.136  | -15.577 | 1.00 | 0.00 | H |
| ATOM | 664 | 2HG2 | THR | 44 | 10.306 | 2.429  | -13.840 | 1.00 | 0.00 | H |
| ATOM | 665 | 3HG2 | THR | 44 | 10.495 | 0.785  | -14.448 | 1.00 | 0.00 | H |
| ATOM | 666 | N    | GLU | 45 | 14.937 | 0.506  | -14.127 | 1.00 | 0.00 | N |
| ATOM | 667 | CA   | GLU | 45 | 16.388 | 0.440  | -14.266 | 1.00 | 0.00 | C |
| ATOM | 668 | C    | GLU | 45 | 16.991 | 1.838  | -14.341 | 1.00 | 0.00 | C |
| ATOM | 669 | O    | GLU | 45 | 17.847 | 2.201  | -13.535 | 1.00 | 0.00 | O |
| ATOM | 670 | CB   | GLU | 45 | 16.765 | -0.358 | -15.516 | 1.00 | 0.00 | C |
| ATOM | 671 | CG   | GLU | 45 | 16.939 | -1.845 | -15.258 | 1.00 | 0.00 | C |
| ATOM | 672 | CD   | GLU | 45 | 17.628 | -2.561 | -16.404 | 1.00 | 0.00 | C |
| ATOM | 673 | OE1  | GLU | 45 | 17.044 | -2.615 | -17.507 | 1.00 | 0.00 | O |

|      |     |      |     |    |        |        |         |      |      |   |
|------|-----|------|-----|----|--------|--------|---------|------|------|---|
| ATOM | 674 | OE2  | GLU | 45 | 18.752 | -3.064 | -16.197 | 1.00 | 0.00 | O |
| ATOM | 675 | H    | GLU | 45 | 14.378 | -0.105 | -14.648 | 1.00 | 0.00 | H |
| ATOM | 676 | HA   | GLU | 45 | 16.782 | -0.062 | -13.396 | 1.00 | 0.00 | H |
| ATOM | 677 | 2HB3 | GLU | 45 | 17.695 | 0.027  | -15.906 | 1.00 | 0.00 | H |
| ATOM | 678 | 2HG3 | GLU | 45 | 15.965 | -2.289 | -15.112 | 1.00 | 0.00 | H |
| ATOM | 679 | HB2  | GLU | 45 | 15.973 | -0.266 | -16.260 | 1.00 | 0.00 | H |
| ATOM | 680 | HG2  | GLU | 45 | 17.556 | -1.993 | -14.374 | 1.00 | 0.00 | H |
| ATOM | 681 | N    | ALA | 46 | 16.538 | 2.620  | -15.316 | 1.00 | 0.00 | N |
| ATOM | 682 | CA   | ALA | 46 | 17.033 | 3.981  | -15.497 | 1.00 | 0.00 | C |
| ATOM | 683 | C    | ALA | 46 | 17.019 | 4.747  | -14.179 | 1.00 | 0.00 | C |
| ATOM | 684 | O    | ALA | 46 | 17.932 | 5.523  | -13.895 | 1.00 | 0.00 | O |
| ATOM | 685 | CB   | ALA | 46 | 16.203 | 4.709  | -16.542 | 1.00 | 0.00 | C |
| ATOM | 686 | H    | ALA | 46 | 15.855 | 2.275  | -15.928 | 1.00 | 0.00 | H |
| ATOM | 687 | HA   | ALA | 46 | 18.050 | 3.922  | -15.857 | 1.00 | 0.00 | H |
| ATOM | 688 | 1HB  | ALA | 46 | 16.690 | 4.636  | -17.503 | 1.00 | 0.00 | H |
| ATOM | 689 | 2HB  | ALA | 46 | 15.221 | 4.260  | -16.600 | 1.00 | 0.00 | H |
| ATOM | 690 | 3HB  | ALA | 46 | 16.107 | 5.749  | -16.265 | 1.00 | 0.00 | H |
| ATOM | 691 | N    | GLU | 47 | 15.980 | 4.528  | -13.380 | 1.00 | 0.00 | N |
| ATOM | 692 | CA   | GLU | 47 | 15.848 | 5.202  | -12.094 | 1.00 | 0.00 | C |
| ATOM | 693 | C    | GLU | 47 | 16.936 | 4.742  | -11.126 | 1.00 | 0.00 | C |
| ATOM | 694 | O    | GLU | 47 | 17.672 | 5.558  | -10.569 | 1.00 | 0.00 | O |
| ATOM | 695 | CB   | GLU | 47 | 14.468 | 4.933  | -11.492 | 1.00 | 0.00 | C |
| ATOM | 696 | CG   | GLU | 47 | 13.320 | 5.435  | -12.353 | 1.00 | 0.00 | C |
| ATOM | 697 | CD   | GLU | 47 | 13.069 | 6.921  | -12.181 | 1.00 | 0.00 | C |
| ATOM | 698 | OE1  | GLU | 47 | 13.809 | 7.722  | -12.793 | 1.00 | 0.00 | O |
| ATOM | 699 | OE2  | GLU | 47 | 12.134 | 7.283  | -11.438 | 1.00 | 0.00 | O |
| ATOM | 700 | H    | GLU | 47 | 15.284 | 3.899  | -13.664 | 1.00 | 0.00 | H |
| ATOM | 701 | HA   | GLU | 47 | 15.959 | 6.262  | -12.262 | 1.00 | 0.00 | H |
| ATOM | 702 | 2HB3 | GLU | 47 | 14.408 | 5.422  | -10.529 | 1.00 | 0.00 | H |
| ATOM | 703 | 2HG3 | GLU | 47 | 12.422 | 4.900  | -12.081 | 1.00 | 0.00 | H |
| ATOM | 704 | HB2  | GLU | 47 | 14.322 | 3.859  | -11.381 | 1.00 | 0.00 | H |
| ATOM | 705 | HG2  | GLU | 47 | 13.555 | 5.268  | -13.405 | 1.00 | 0.00 | H |
| ATOM | 706 | N    | LEU | 48 | 17.030 | 3.431  | -10.931 | 1.00 | 0.00 | N |
| ATOM | 707 | CA   | LEU | 48 | 18.026 | 2.861  | -10.031 | 1.00 | 0.00 | C |
| ATOM | 708 | C    | LEU | 48 | 19.434 | 3.287  | -10.436 | 1.00 | 0.00 | C |
| ATOM | 709 | O    | LEU | 48 | 20.229 | 3.712  | -9.600  | 1.00 | 0.00 | O |
| ATOM | 710 | CB   | LEU | 48 | 17.923 | 1.336  | -10.024 | 1.00 | 0.00 | C |
| ATOM | 711 | CG   | LEU | 48 | 16.611 | 0.753  | -9.500  | 1.00 | 0.00 | C |
| ATOM | 712 | CD1  | LEU | 48 | 16.362 | -0.625 | -10.092 | 1.00 | 0.00 | C |
| ATOM | 713 | CD2  | LEU | 48 | 16.626 | 0.687  | -7.980  | 1.00 | 0.00 | C |
| ATOM | 714 | H    | LEU | 48 | 16.416 | 2.832  | -11.404 | 1.00 | 0.00 | H |
| ATOM | 715 | HA   | LEU | 48 | 17.824 | 3.233  | -9.036  | 1.00 | 0.00 | H |
| ATOM | 716 | 2HB3 | LEU | 48 | 18.725 | 0.953  | -9.408  | 1.00 | 0.00 | H |
| ATOM | 717 | HG   | LEU | 48 | 15.794 | 1.397  | -9.799  | 1.00 | 0.00 | H |
| ATOM | 718 | 1HD1 | LEU | 48 | 16.732 | -1.381 | -9.416  | 1.00 | 0.00 | H |
| ATOM | 719 | 2HD1 | LEU | 48 | 16.877 | -0.707 | -11.040 | 1.00 | 0.00 | H |
| ATOM | 720 | 3HD1 | LEU | 48 | 15.303 | -0.766 | -10.246 | 1.00 | 0.00 | H |
| ATOM | 721 | 1HD2 | LEU | 48 | 17.470 | 1.246  | -7.605  | 1.00 | 0.00 | H |
| ATOM | 722 | 2HD2 | LEU | 48 | 16.711 | -0.344 | -7.665  | 1.00 | 0.00 | H |
| ATOM | 723 | 3HD2 | LEU | 48 | 15.711 | 1.108  | -7.592  | 1.00 | 0.00 | H |
| ATOM | 724 | HB2  | LEU | 48 | 18.000 | 0.962  | -11.046 | 1.00 | 0.00 | H |
| ATOM | 725 | N    | GLN | 49 | 19.732 | 3.170  | -11.726 | 1.00 | 0.00 | N |
| ATOM | 726 | CA   | GLN | 49 | 21.044 | 3.544  | -12.243 | 1.00 | 0.00 | C |
| ATOM | 727 | C    | GLN | 49 | 21.360 | 5.001  | -11.924 | 1.00 | 0.00 | C |
| ATOM | 728 | O    | GLN | 49 | 22.462 | 5.324  | -11.482 | 1.00 | 0.00 | O |
| ATOM | 729 | CB   | GLN | 49 | 21.104 | 3.317  | -13.756 | 1.00 | 0.00 | C |
| ATOM | 730 | CG   | GLN | 49 | 21.306 | 1.861  | -14.144 | 1.00 | 0.00 | C |
| ATOM | 731 | CD   | GLN | 49 | 22.772 | 1.493  | -14.279 | 1.00 | 0.00 | C |
| ATOM | 732 | OE1  | GLN | 49 | 23.277 | 1.303  | -15.387 | 1.00 | 0.00 | O |
| ATOM | 733 | NE2  | GLN | 49 | 23.463 | 1.389  | -13.151 | 1.00 | 0.00 | N |
| ATOM | 734 | H    | GLN | 49 | 19.056 | 2.825  | -12.345 | 1.00 | 0.00 | H |
| ATOM | 735 | HA   | GLN | 49 | 21.780 | 2.914  | -11.764 | 1.00 | 0.00 | H |
| ATOM | 736 | 2HB3 | GLN | 49 | 21.920 | 3.893  | -14.161 | 1.00 | 0.00 | H |
| ATOM | 737 | 2HG3 | GLN | 49 | 20.817 | 1.683  | -15.090 | 1.00 | 0.00 | H |
| ATOM | 738 | 1HE2 | GLN | 49 | 22.994 | 1.554  | -12.304 | 1.00 | 0.00 | H |
| ATOM | 739 | 2HE2 | GLN | 49 | 24.410 | 1.153  | -13.208 | 1.00 | 0.00 | H |
| ATOM | 740 | HB2  | GLN | 49 | 20.161 | 3.624  | -14.207 | 1.00 | 0.00 | H |
| ATOM | 741 | HG2  | GLN | 49 | 20.881 | 1.217  | -13.374 | 1.00 | 0.00 | H |
| ATOM | 742 | N    | ASP | 50 | 20.386 | 5.876  | -12.150 | 1.00 | 0.00 | N |
| ATOM | 743 | CA   | ASP | 50 | 20.560 | 7.299  | -11.884 | 1.00 | 0.00 | C |
| ATOM | 744 | C    | ASP | 50 | 20.849 | 7.544  | -10.408 | 1.00 | 0.00 | C |
| ATOM | 745 | O    | ASP | 50 | 21.698 | 8.367  | -10.059 | 1.00 | 0.00 | O |
| ATOM | 746 | CB   | ASP | 50 | 19.313 | 8.075  | -12.308 | 1.00 | 0.00 | C |
| ATOM | 747 | CG   | ASP | 50 | 19.359 | 8.494  | -13.764 | 1.00 | 0.00 | C |
| ATOM | 748 | OD1  | ASP | 50 | 20.329 | 9.177  | -14.154 | 1.00 | 0.00 | O |
| ATOM | 749 | OD2  | ASP | 50 | 18.425 | 8.141  | -14.514 | 1.00 | 0.00 | O |
| ATOM | 750 | H    | ASP | 50 | 19.529 | 5.557  | -12.503 | 1.00 | 0.00 | H |

|      |     |      |      |    |        |        |         |      |      |   |
|------|-----|------|------|----|--------|--------|---------|------|------|---|
| ATOM | 751 | HA   | ASP  | 50 | 21.401 | 7.643  | -12.466 | 1.00 | 0.00 | H |
| ATOM | 752 | 2HB3 | ASP  | 50 | 19.224 | 8.962  | -11.700 | 1.00 | 0.00 | H |
| ATOM | 753 | HB2  | ASP  | 50 | 18.433 | 7.446  | -12.179 | 1.00 | 0.00 | H |
| ATOM | 754 | N    | MET  | 51 | 20.139 | 6.829  | -9.542  | 1.00 | 0.00 | N |
| ATOM | 755 | CA   | MET  | 51 | 20.321 | 6.969  | -8.102  | 1.00 | 0.00 | C |
| ATOM | 756 | C    | MET  | 51 | 21.669 | 6.403  | -7.667  | 1.00 | 0.00 | C |
| ATOM | 757 | O    | MET  | 51 | 22.336 | 6.964  | -6.796  | 1.00 | 0.00 | O |
| ATOM | 758 | CB   | MET  | 51 | 19.191 | 6.260  | -7.353  | 1.00 | 0.00 | C |
| ATOM | 759 | CG   | MET  | 51 | 17.869 | 7.012  | -7.398  | 1.00 | 0.00 | C |
| ATOM | 760 | SD   | MET  | 51 | 16.591 | 6.228  | -6.397  | 1.00 | 0.00 | S |
| ATOM | 761 | CE   | MET  | 51 | 15.915 | 5.055  | -7.568  | 1.00 | 0.00 | C |
| ATOM | 762 | H    | MET  | 51 | 19.478 | 6.188  | -9.881  | 1.00 | 0.00 | H |
| ATOM | 763 | HA   | MET  | 51 | 20.295 | 8.022  | -7.867  | 1.00 | 0.00 | H |
| ATOM | 764 | 2HB3 | MET  | 51 | 19.478 | 6.144  | -6.319  | 1.00 | 0.00 | H |
| ATOM | 765 | 2HG3 | MET  | 51 | 17.530 | 7.054  | -8.423  | 1.00 | 0.00 | H |
| ATOM | 766 | 1HE  | MET  | 51 | 16.699 | 4.706  | -8.224  | 1.00 | 0.00 | H |
| ATOM | 767 | 2HE  | MET  | 51 | 15.492 | 4.216  | -7.036  | 1.00 | 0.00 | H |
| ATOM | 768 | 3HE  | MET  | 51 | 15.145 | 5.535  | -8.156  | 1.00 | 0.00 | H |
| ATOM | 769 | HB2  | MET  | 51 | 19.006 | 5.288  | -7.808  | 1.00 | 0.00 | H |
| ATOM | 770 | HG2  | MET  | 51 | 18.008 | 8.019  | -7.004  | 1.00 | 0.00 | H |
| ATOM | 771 | N    | I LE | 52 | 22.062 | 5.287  | -8.274  | 1.00 | 0.00 | N |
| ATOM | 772 | CA   | I LE | 52 | 23.331 | 4.648  | -7.949  | 1.00 | 0.00 | C |
| ATOM | 773 | C    | I LE | 52 | 24.508 | 5.512  | -8.379  | 1.00 | 0.00 | C |
| ATOM | 774 | O    | I LE | 52 | 25.460 | 5.706  | -7.623  | 1.00 | 0.00 | O |
| ATOM | 775 | CB   | I LE | 52 | 23.449 | 3.265  | -8.615  | 1.00 | 0.00 | C |
| ATOM | 776 | CG   | I LE | 52 | 24.858 | 2.715  | -8.447  | 1.00 | 0.00 | C |
| ATOM | 777 | CG1  | I LE | 52 | 22.421 | 2.299  | -8.023  | 1.00 | 0.00 | C |
| ATOM | 778 | CD1  | I LE | 52 | 22.093 | 1.135  | -8.933  | 1.00 | 0.00 | C |
| ATOM | 779 | H    | I LE | 52 | 21.485 | 4.889  | -8.959  | 1.00 | 0.00 | H |
| ATOM | 780 | HA   | I LE | 52 | 23.369 | 4.513  | -6.877  | 1.00 | 0.00 | H |
| ATOM | 781 | HB   | I LE | 52 | 23.258 | 3.380  | -9.671  | 1.00 | 0.00 | H |
| ATOM | 782 | 1HG2 | I LE | 52 | 25.162 | 2.814  | -7.415  | 1.00 | 0.00 | H |
| ATOM | 783 | 2HG2 | I LE | 52 | 24.874 | 1.673  | -8.727  | 1.00 | 0.00 | H |
| ATOM | 784 | 3HG2 | I LE | 52 | 25.539 | 3.269  | -9.078  | 1.00 | 0.00 | H |
| ATOM | 785 | 2HG3 | I LE | 52 | 21.505 | 2.836  | -7.828  | 1.00 | 0.00 | H |
| ATOM | 786 | 1HD1 | I LE | 52 | 21.990 | 0.235  | -8.344  | 1.00 | 0.00 | H |
| ATOM | 787 | 2HD1 | I LE | 52 | 21.168 | 1.333  | -9.453  | 1.00 | 0.00 | H |
| ATOM | 788 | 3HD1 | I LE | 52 | 22.890 | 1.004  | -9.652  | 1.00 | 0.00 | H |
| ATOM | 789 | HG2  | I LE | 52 | 22.809 | 1.876  | -7.096  | 1.00 | 0.00 | H |
| ATOM | 790 | N    | ASN  | 53 | 24.440 | 6.030  | -9.601  | 1.00 | 0.00 | N |
| ATOM | 791 | CA   | ASN  | 53 | 25.502 | 6.875  | -10.135 | 1.00 | 0.00 | C |
| ATOM | 792 | C    | ASN  | 53 | 25.601 | 8.183  | -9.353  | 1.00 | 0.00 | C |
| ATOM | 793 | O    | ASN  | 53 | 26.693 | 8.702  | -9.130  | 1.00 | 0.00 | O |
| ATOM | 794 | CB   | ASN  | 53 | 25.253 | 7.172  | -11.616 | 1.00 | 0.00 | C |
| ATOM | 795 | CG   | ASN  | 53 | 25.687 | 6.029  | -12.514 | 1.00 | 0.00 | C |
| ATOM | 796 | OD1  | ASN  | 53 | 26.878 | 5.753  | -12.653 | 1.00 | 0.00 | O |
| ATOM | 797 | ND2  | ASN  | 53 | 24.718 | 5.361  | -13.130 | 1.00 | 0.00 | N |
| ATOM | 798 | H    | ASN  | 53 | 23.656 | 5.840  | -10.159 | 1.00 | 0.00 | H |
| ATOM | 799 | HA   | ASN  | 53 | 26.434 | 6.339  | -10.035 | 1.00 | 0.00 | H |
| ATOM | 800 | 2HB3 | ASN  | 53 | 25.803 | 8.056  | -11.899 | 1.00 | 0.00 | H |
| ATOM | 801 | 1HD2 | ASN  | 53 | 23.792 | 5.637  | -12.970 | 1.00 | 0.00 | H |
| ATOM | 802 | 2HD2 | ASN  | 53 | 24.970 | 4.618  | -13.715 | 1.00 | 0.00 | H |
| ATOM | 803 | HB2  | ASN  | 53 | 24.187 | 7.329  | -11.781 | 1.00 | 0.00 | H |
| ATOM | 804 | N    | GLU  | 54 | 24.452 | 8.707  | -8.941  | 1.00 | 0.00 | N |
| ATOM | 805 | CA   | GLU  | 54 | 24.410 | 9.952  | -8.185  | 1.00 | 0.00 | C |
| ATOM | 806 | C    | GLU  | 54 | 25.196 | 9.826  | -6.883  | 1.00 | 0.00 | C |
| ATOM | 807 | O    | GLU  | 54 | 25.897 | 10.751 | -6.475  | 1.00 | 0.00 | O |
| ATOM | 808 | CB   | GLU  | 54 | 22.962 | 10.343 | -7.882  | 1.00 | 0.00 | C |
| ATOM | 809 | CG   | GLU  | 54 | 22.290 | 11.108 | -9.011  | 1.00 | 0.00 | C |
| ATOM | 810 | CD   | GLU  | 54 | 22.722 | 12.560 | -9.072  | 1.00 | 0.00 | C |
| ATOM | 811 | OE1  | GLU  | 54 | 23.935 | 12.823 | -8.935  | 1.00 | 0.00 | O |
| ATOM | 812 | OE2  | GLU  | 54 | 21.848 | 13.432 | -9.255  | 1.00 | 0.00 | O |
| ATOM | 813 | H    | GLU  | 54 | 23.612 | 8.245  | -9.150  | 1.00 | 0.00 | H |
| ATOM | 814 | HA   | GLU  | 54 | 24.862 | 10.724 | -8.790  | 1.00 | 0.00 | H |
| ATOM | 815 | 2HB3 | GLU  | 54 | 22.946 | 10.963 | -6.998  | 1.00 | 0.00 | H |
| ATOM | 816 | 2HG3 | GLU  | 54 | 21.220 | 11.070 | -8.867  | 1.00 | 0.00 | H |
| ATOM | 817 | HB2  | GLU  | 54 | 22.367 | 9.444  | -7.725  | 1.00 | 0.00 | H |
| ATOM | 818 | HG2  | GLU  | 54 | 22.557 | 10.656 | -9.965  | 1.00 | 0.00 | H |
| ATOM | 819 | N    | VAL  | 55 | 25.073 | 8.672  | -6.234  | 1.00 | 0.00 | N |
| ATOM | 820 | CA   | VAL  | 55 | 25.772 | 8.422  | -4.978  | 1.00 | 0.00 | C |
| ATOM | 821 | C    | VAL  | 55 | 27.179 | 7.894  | -5.229  | 1.00 | 0.00 | C |
| ATOM | 822 | O    | VAL  | 55 | 28.109 | 8.191  | -4.479  | 1.00 | 0.00 | O |
| ATOM | 823 | CB   | VAL  | 55 | 25.005 | 7.415  | -4.101  | 1.00 | 0.00 | C |
| ATOM | 824 | CG1  | VAL  | 55 | 25.809 | 7.069  | -2.856  | 1.00 | 0.00 | C |
| ATOM | 825 | CG2  | VAL  | 55 | 23.639 | 7.971  | -3.724  | 1.00 | 0.00 | C |
| ATOM | 826 | H    | VAL  | 55 | 24.499 | 7.972  | -6.609  | 1.00 | 0.00 | H |
| ATOM | 827 | HA   | VAL  | 55 | 25.840 | 9.358  | -4.443  | 1.00 | 0.00 | H |

|      |     |      |     |    |        |        |         |      |      |   |
|------|-----|------|-----|----|--------|--------|---------|------|------|---|
| ATOM | 828 | HB   | VAL | 55 | 24.858 | 6.511  | -4.671  | 1.00 | 0.00 | H |
| ATOM | 829 | 1HG1 | VAL | 55 | 25.237 | 7.320  | -1.977  | 1.00 | 0.00 | H |
| ATOM | 830 | 2HG1 | VAL | 55 | 26.034 | 6.013  | -2.856  | 1.00 | 0.00 | H |
| ATOM | 831 | 3HG1 | VAL | 55 | 26.731 | 7.634  | -2.858  | 1.00 | 0.00 | H |
| ATOM | 832 | 1HG2 | VAL | 55 | 23.684 | 8.391  | -2.729  | 1.00 | 0.00 | H |
| ATOM | 833 | 2HG2 | VAL | 55 | 23.356 | 8.740  | -4.428  | 1.00 | 0.00 | H |
| ATOM | 834 | 3HG2 | VAL | 55 | 22.909 | 7.175  | -3.745  | 1.00 | 0.00 | H |
| ATOM | 835 | N    | ASP | 56 | 27.329 | 7.105  | -6.288  | 1.00 | 0.00 | N |
| ATOM | 836 | CA   | ASP | 56 | 28.626 | 6.534  | -6.639  | 1.00 | 0.00 | C |
| ATOM | 837 | C    | ASP | 56 | 29.704 | 7.613  | -6.666  | 1.00 | 0.00 | C |
| ATOM | 838 | O    | ASP | 56 | 29.642 | 8.547  | -7.464  | 1.00 | 0.00 | O |
| ATOM | 839 | CB   | ASP | 56 | 28.548 | 5.839  | -8.000  | 1.00 | 0.00 | C |
| ATOM | 840 | CG   | ASP | 56 | 29.613 | 4.773  | -8.166  | 1.00 | 0.00 | C |
| ATOM | 841 | OD1  | ASP | 56 | 29.579 | 3.778  | -7.412  | 1.00 | 0.00 | O |
| ATOM | 842 | OD2  | ASP | 56 | 30.480 | 4.935  | -9.049  | 1.00 | 0.00 | O |
| ATOM | 843 | H    | ASP | 56 | 26.550 | 6.904  | -6.848  | 1.00 | 0.00 | H |
| ATOM | 844 | HA   | ASP | 56 | 28.881 | 5.806  | -5.885  | 1.00 | 0.00 | H |
| ATOM | 845 | 2HB3 | ASP | 56 | 28.674 | 6.575  | -8.780  | 1.00 | 0.00 | H |
| ATOM | 846 | HB2  | ASP | 56 | 27.579 | 5.350  | -8.104  | 1.00 | 0.00 | H |
| ATOM | 847 | N    | ALA | 57 | 30.692 | 7.476  | -5.787  | 1.00 | 0.00 | N |
| ATOM | 848 | CA   | ALA | 57 | 31.784 | 8.437  | -5.711  | 1.00 | 0.00 | C |
| ATOM | 849 | C    | ALA | 57 | 33.110 | 7.790  | -6.100  | 1.00 | 0.00 | C |
| ATOM | 850 | O    | ALA | 57 | 33.819 | 8.286  | -6.977  | 1.00 | 0.00 | O |
| ATOM | 851 | CB   | ALA | 57 | 31.873 | 9.025  | -4.309  | 1.00 | 0.00 | C |
| ATOM | 852 | H    | ALA | 57 | 30.686 | 6.709  | -5.177  | 1.00 | 0.00 | H |
| ATOM | 853 | HA   | ALA | 57 | 31.572 | 9.241  | -6.399  | 1.00 | 0.00 | H |
| ATOM | 854 | 1HB  | ALA | 57 | 32.777 | 8.679  | -3.832  | 1.00 | 0.00 | H |
| ATOM | 855 | 2HB  | ALA | 57 | 31.889 | 10.102 | -4.372  | 1.00 | 0.00 | H |
| ATOM | 856 | 3HB  | ALA | 57 | 31.016 | 8.709  | -3.734  | 1.00 | 0.00 | H |
| ATOM | 857 | N    | ASP | 58 | 33.442 | 6.687  | -5.442  | 1.00 | 0.00 | N |
| ATOM | 858 | CA   | ASP | 58 | 34.684 | 5.973  | -5.718  | 1.00 | 0.00 | C |
| ATOM | 859 | C    | ASP | 58 | 34.967 | 5.939  | -7.216  | 1.00 | 0.00 | C |
| ATOM | 860 | O    | ASP | 58 | 36.092 | 6.177  | -7.652  | 1.00 | 0.00 | O |
| ATOM | 861 | CB   | ASP | 58 | 34.611 | 4.549  | -5.167  | 1.00 | 0.00 | C |
| ATOM | 862 | CG   | ASP | 58 | 33.706 | 3.654  | -5.990  | 1.00 | 0.00 | C |
| ATOM | 863 | OD1  | ASP | 58 | 32.649 | 4.138  | -6.444  | 1.00 | 0.00 | O |
| ATOM | 864 | OD2  | ASP | 58 | 34.053 | 2.469  | -6.178  | 1.00 | 0.00 | O |
| ATOM | 865 | H    | ASP | 58 | 32.835 | 6.341  | -4.752  | 1.00 | 0.00 | H |
| ATOM | 866 | HA   | ASP | 58 | 35.486 | 6.501  | -5.225  | 1.00 | 0.00 | H |
| ATOM | 867 | 2HB3 | ASP | 58 | 34.235 | 4.580  | -4.156  | 1.00 | 0.00 | H |
| ATOM | 868 | HB2  | ASP | 58 | 35.606 | 4.102  | -5.183  | 1.00 | 0.00 | H |
| ATOM | 869 | N    | GLY | 59 | 33.935 | 5.639  | -8.003  | 1.00 | 0.00 | N |
| ATOM | 870 | CA   | GLY | 59 | 34.096 | 5.579  | -9.444  | 1.00 | 0.00 | C |
| ATOM | 871 | C    | GLY | 59 | 34.102 | 4.156  | -9.966  | 1.00 | 0.00 | C |
| ATOM | 872 | O    | GLY | 59 | 34.861 | 3.826  | -10.876 | 1.00 | 0.00 | O |
| ATOM | 873 | H    | GLY | 59 | 33.062 | 5.459  | -7.600  | 1.00 | 0.00 | H |
| ATOM | 874 | 2HA  | GLY | 59 | 33.285 | 6.119  | -9.908  | 1.00 | 0.00 | H |
| ATOM | 875 | 3HA  | GLY | 59 | 35.029 | 6.053  | -9.712  | 1.00 | 0.00 | H |
| ATOM | 876 | N    | ASN | 60 | 33.254 | 3.312  | -9.388  | 1.00 | 0.00 | N |
| ATOM | 877 | CA   | ASN | 60 | 33.165 | 1.915  | -9.800  | 1.00 | 0.00 | C |
| ATOM | 878 | C    | ASN | 60 | 31.796 | 1.610  | -10.400 | 1.00 | 0.00 | C |
| ATOM | 879 | O    | ASN | 60 | 31.695 | 0.993  | -11.461 | 1.00 | 0.00 | O |
| ATOM | 880 | CB   | ASN | 60 | 33.430 | 0.993  | -8.609  | 1.00 | 0.00 | C |
| ATOM | 881 | CG   | ASN | 60 | 32.248 | 0.921  | -7.661  | 1.00 | 0.00 | C |
| ATOM | 882 | OD1  | ASN | 60 | 31.776 | 1.942  | -7.162  | 1.00 | 0.00 | O |
| ATOM | 883 | ND2  | ASN | 60 | 31.766 | -0.290 | -7.406  | 1.00 | 0.00 | N |
| ATOM | 884 | H    | ASN | 60 | 32.673 | 3.635  | -8.667  | 1.00 | 0.00 | H |
| ATOM | 885 | HA   | ASN | 60 | 33.923 | 1.744  | -10.552 | 1.00 | 0.00 | H |
| ATOM | 886 | 2HB3 | ASN | 60 | 34.287 | 1.357  | -8.062  | 1.00 | 0.00 | H |
| ATOM | 887 | 1HD2 | ASN | 60 | 32.194 | -1.058 | -7.840  | 1.00 | 0.00 | H |
| ATOM | 888 | 2HD2 | ASN | 60 | 31.003 | -0.365 | -6.798  | 1.00 | 0.00 | H |
| ATOM | 889 | HB2  | ASN | 60 | 33.620 | -0.018 | -8.967  | 1.00 | 0.00 | H |
| ATOM | 890 | N    | GLY | 61 | 30.745 | 2.048  | -9.715  | 1.00 | 0.00 | N |
| ATOM | 891 | CA   | GLY | 61 | 29.395 | 1.812  | -10.196 | 1.00 | 0.00 | C |
| ATOM | 892 | C    | GLY | 61 | 28.431 | 1.476  | -9.076  | 1.00 | 0.00 | C |
| ATOM | 893 | O    | GLY | 61 | 27.399 | 2.129  | -8.917  | 1.00 | 0.00 | O |
| ATOM | 894 | H    | GLY | 61 | 30.887 | 2.533  | -8.875  | 1.00 | 0.00 | H |
| ATOM | 895 | 2HA  | GLY | 61 | 29.046 | 2.699  | -10.704 | 1.00 | 0.00 | H |
| ATOM | 896 | 3HA  | GLY | 61 | 29.415 | 0.991  | -10.897 | 1.00 | 0.00 | H |
| ATOM | 897 | N    | THR | 62 | 28.766 | 0.453  | -8.296  | 1.00 | 0.00 | N |
| ATOM | 898 | CA   | THR | 62 | 27.921 | 0.029  | -7.187  | 1.00 | 0.00 | C |
| ATOM | 899 | C    | THR | 62 | 28.228 | 0.826  | -5.925  | 1.00 | 0.00 | C |
| ATOM | 900 | O    | THR | 62 | 29.391 | 1.005  | -5.560  | 1.00 | 0.00 | O |
| ATOM | 901 | CB   | THR | 62 | 28.099 | -1.471 | -6.887  | 1.00 | 0.00 | C |
| ATOM | 902 | OG1  | THR | 62 | 29.466 | -1.749 | -6.566  | 1.00 | 0.00 | O |
| ATOM | 903 | CG2  | THR | 62 | 27.673 | -2.315 | -8.079  | 1.00 | 0.00 | C |
| ATOM | 904 | H    | THR | 62 | 29.602 | -0.028 | -8.472  | 1.00 | 0.00 | H |



|      |     |      |     |    |        |        |        |      |      |   |
|------|-----|------|-----|----|--------|--------|--------|------|------|---|
| ATOM | 905 | HA   | THR | 62 | 26.892 | 0.199  | -7.468 | 1.00 | 0.00 | H |
| ATOM | 906 | HB   | THR | 62 | 27.478 | -1.731 | -6.042 | 1.00 | 0.00 | H |
| ATOM | 907 | 1HG  | THR | 62 | 29.817 | -2.391 | -7.187 | 1.00 | 0.00 | H |
| ATOM | 908 | 1HG2 | THR | 62 | 26.596 | -2.414 | -8.085 | 1.00 | 0.00 | H |
| ATOM | 909 | 2HG2 | THR | 62 | 28.123 | -3.296 | -8.007 | 1.00 | 0.00 | H |
| ATOM | 910 | 3HG2 | THR | 62 | 27.994 | -1.838 | -8.991 | 1.00 | 0.00 | H |
| ATOM | 911 | N    | ILE | 63 | 27.180 | 1.304  | -5.262 | 1.00 | 0.00 | N |
| ATOM | 912 | CA   | ILE | 63 | 27.340 | 2.081  | -4.040 | 1.00 | 0.00 | C |
| ATOM | 913 | C    | ILE | 63 | 28.190 | 1.334  | -3.020 | 1.00 | 0.00 | C |
| ATOM | 914 | O    | ILE | 63 | 28.183 | 0.104  | -2.972 | 1.00 | 0.00 | O |
| ATOM | 915 | CB   | ILE | 63 | 25.976 | 2.421  | -3.408 | 1.00 | 0.00 | C |
| ATOM | 916 | CG2  | ILE | 63 | 26.174 | 3.203  | -2.117 | 1.00 | 0.00 | C |
| ATOM | 917 | CG1  | ILE | 63 | 25.115 | 3.213  | -4.393 | 1.00 | 0.00 | C |
| ATOM | 918 | CD1  | ILE | 63 | 24.068 | 2.374  | -5.089 | 1.00 | 0.00 | C |
| ATOM | 919 | H    | ILE | 63 | 26.280 | 1.128  | -5.603 | 1.00 | 0.00 | H |
| ATOM | 920 | HA   | ILE | 63 | 27.836 | 3.007  | -4.297 | 1.00 | 0.00 | H |
| ATOM | 921 | HB   | ILE | 63 | 25.477 | 1.496  | -3.166 | 1.00 | 0.00 | H |
| ATOM | 922 | 1HG2 | ILE | 63 | 25.218 | 3.343  | -1.633 | 1.00 | 0.00 | H |
| ATOM | 923 | 2HG2 | ILE | 63 | 26.833 | 2.657  | -1.461 | 1.00 | 0.00 | H |
| ATOM | 924 | 3HG2 | ILE | 63 | 26.606 | 4.167  | -2.344 | 1.00 | 0.00 | H |
| ATOM | 925 | 2HG3 | ILE | 63 | 25.753 | 3.645  | -5.151 | 1.00 | 0.00 | H |
| ATOM | 926 | 1HD1 | ILE | 63 | 24.538 | 1.766  | -5.847 | 1.00 | 0.00 | H |
| ATOM | 927 | 2HD1 | ILE | 63 | 23.578 | 1.737  | -4.368 | 1.00 | 0.00 | H |
| ATOM | 928 | 3HD1 | ILE | 63 | 23.336 | 3.024  | -5.551 | 1.00 | 0.00 | H |
| ATOM | 929 | HG2  | ILE | 63 | 24.583 | 4.002  | -3.859 | 1.00 | 0.00 | H |
| ATOM | 930 | N    | ASP | 64 | 28.921 | 2.084  | -2.203 | 1.00 | 0.00 | N |
| ATOM | 931 | CA   | ASP | 64 | 29.775 | 1.492  | -1.180 | 1.00 | 0.00 | C |
| ATOM | 932 | C    | ASP | 64 | 29.286 | 1.861  | 0.216  | 1.00 | 0.00 | C |
| ATOM | 933 | O    | ASP | 64 | 28.241 | 2.494  | 0.373  | 1.00 | 0.00 | O |
| ATOM | 934 | CB   | ASP | 64 | 31.223 | 1.953  | -1.364 | 1.00 | 0.00 | C |
| ATOM | 935 | CG   | ASP | 64 | 31.711 | 1.767  | -2.786 | 1.00 | 0.00 | C |
| ATOM | 936 | OD1  | ASP | 64 | 31.013 | 1.094  | -3.571 | 1.00 | 0.00 | O |
| ATOM | 937 | OD2  | ASP | 64 | 32.797 | 2.296  | -3.115 | 1.00 | 0.00 | O |
| ATOM | 938 | H    | ASP | 64 | 28.885 | 3.060  | -2.289 | 1.00 | 0.00 | H |
| ATOM | 939 | HA   | ASP | 64 | 29.732 | 0.419  | -1.292 | 1.00 | 0.00 | H |
| ATOM | 940 | 2HB3 | ASP | 64 | 31.861 | 1.384  | -0.706 | 1.00 | 0.00 | H |
| ATOM | 941 | HB2  | ASP | 64 | 31.297 | 3.015  | -1.129 | 1.00 | 0.00 | H |
| ATOM | 942 | N    | PHE | 65 | 30.045 | 1.459  | 1.230  | 1.00 | 0.00 | N |
| ATOM | 943 | CA   | PHE | 65 | 29.687 | 1.743  | 2.614  | 1.00 | 0.00 | C |
| ATOM | 944 | C    | PHE | 65 | 29.653 | 3.248  | 2.870  | 1.00 | 0.00 | C |
| ATOM | 945 | O    | PHE | 65 | 28.694 | 3.790  | 3.421  | 1.00 | 0.00 | O |
| ATOM | 946 | CB   | PHE | 65 | 30.680 | 1.076  | 3.569  | 1.00 | 0.00 | C |
| ATOM | 947 | CG   | PHE | 65 | 30.077 | 0.691  | 4.890  | 1.00 | 0.00 | C |
| ATOM | 948 | CD1  | PHE | 65 | 29.377 | 1.620  | 5.643  | 1.00 | 0.00 | C |
| ATOM | 949 | CE1  | PHE | 65 | 28.821 | 1.269  | 6.859  | 1.00 | 0.00 | C |
| ATOM | 950 | CZ   | PHE | 65 | 28.959 | -0.020 | 7.333  | 1.00 | 0.00 | C |
| ATOM | 951 | CE2  | PHE | 65 | 29.653 | -0.955 | 6.592  | 1.00 | 0.00 | C |
| ATOM | 952 | CD2  | PHE | 65 | 30.208 | -0.599 | 5.377  | 1.00 | 0.00 | C |
| ATOM | 953 | H    | PHE | 65 | 30.866 | 0.957  | 1.043  | 1.00 | 0.00 | H |
| ATOM | 954 | HA   | PHE | 65 | 28.703 | 1.339  | 2.792  | 1.00 | 0.00 | H |
| ATOM | 955 | 2HB3 | PHE | 65 | 31.496 | 1.757  | 3.762  | 1.00 | 0.00 | H |
| ATOM | 956 | 1HD  | PHE | 65 | 29.268 | 2.631  | 5.273  | 1.00 | 0.00 | H |
| ATOM | 957 | 1HE  | PHE | 65 | 28.280 | 2.003  | 7.438  | 1.00 | 0.00 | H |
| ATOM | 958 | HZ   | PHE | 65 | 28.526 | -0.297 | 8.282  | 1.00 | 0.00 | H |
| ATOM | 959 | 2HE  | PHE | 65 | 29.763 | -1.964 | 6.959  | 1.00 | 0.00 | H |
| ATOM | 960 | 2HD  | PHE | 65 | 30.750 | -1.331 | 4.797  | 1.00 | 0.00 | H |
| ATOM | 961 | HB2  | PHE | 65 | 31.058 | 0.159  | 3.118  | 1.00 | 0.00 | H |
| ATOM | 962 | N    | PRO | 66 | 30.726 | 3.942  | 2.456  | 1.00 | 0.00 | N |
| ATOM | 963 | CA   | PRO | 66 | 30.842 | 5.392  | 2.626  | 1.00 | 0.00 | C |
| ATOM | 964 | C    | PRO | 66 | 29.878 | 6.162  | 1.732  | 1.00 | 0.00 | C |
| ATOM | 965 | O    | PRO | 66 | 29.143 | 7.031  | 2.201  | 1.00 | 0.00 | O |
| ATOM | 966 | CD   | PRO | 66 | 31.903 | 3.362  | 1.790  | 1.00 | 0.00 | C |
| ATOM | 967 | CB   | PRO | 66 | 32.291 | 5.680  | 2.225  | 1.00 | 0.00 | C |
| ATOM | 968 | CG   | PRO | 66 | 32.656 | 4.569  | 1.302  | 1.00 | 0.00 | C |
| ATOM | 969 | HA   | PRO | 66 | 30.688 | 5.685  | 3.656  | 1.00 | 0.00 | H |
| ATOM | 970 | 2HB3 | PRO | 66 | 32.919 | 5.686  | 3.104  | 1.00 | 0.00 | H |
| ATOM | 971 | 2HG3 | PRO | 66 | 33.720 | 4.390  | 1.346  | 1.00 | 0.00 | H |
| ATOM | 972 | 2HD3 | PRO | 66 | 32.504 | 2.802  | 2.491  | 1.00 | 0.00 | H |
| ATOM | 973 | HD2  | PRO | 66 | 31.581 | 2.738  | 0.957  | 1.00 | 0.00 | H |
| ATOM | 974 | HB2  | PRO | 66 | 32.346 | 6.655  | 1.740  | 1.00 | 0.00 | H |
| ATOM | 975 | HG2  | PRO | 66 | 32.343 | 4.807  | 0.285  | 1.00 | 0.00 | H |
| ATOM | 976 | N    | GLU | 67 | 29.884 | 5.838  | 0.444  | 1.00 | 0.00 | N |
| ATOM | 977 | CA   | GLU | 67 | 29.011 | 6.499  | -0.517 | 1.00 | 0.00 | C |
| ATOM | 978 | C    | GLU | 67 | 27.547 | 6.355  | -0.107 | 1.00 | 0.00 | C |
| ATOM | 979 | O    | GLU | 67 | 26.789 | 7.325  | -0.121 | 1.00 | 0.00 | O |
| ATOM | 980 | CB   | GLU | 67 | 29.219 | 5.917  | -1.916 | 1.00 | 0.00 | C |
| ATOM | 981 | CG   | GLU | 67 | 30.673 | 5.898  | -2.357 | 1.00 | 0.00 | C |

|      |      |      |     |    |        |        |        |      |      |   |
|------|------|------|-----|----|--------|--------|--------|------|------|---|
| ATOM | 982  | CD   | GLU | 67 | 30.899 | 5.034  | -3.583 | 1.00 | 0.00 | C |
| ATOM | 983  | OE1  | GLU | 67 | 29.909 | 4.717  | -4.275 | 1.00 | 0.00 | O |
| ATOM | 984  | OE2  | GLU | 67 | 32.065 | 4.676  | -3.850 | 1.00 | 0.00 | O |
| ATOM | 985  | H    | GLU | 67 | 30.493 | 5.135  | 0.131  | 1.00 | 0.00 | H |
| ATOM | 986  | HA   | GLU | 67 | 29.266 | 7.548  | -0.529 | 1.00 | 0.00 | H |
| ATOM | 987  | 2HB3 | GLU | 67 | 28.657 | 6.509  | -2.625 | 1.00 | 0.00 | H |
| ATOM | 988  | 2HG3 | GLU | 67 | 31.275 | 5.512  | -1.547 | 1.00 | 0.00 | H |
| ATOM | 989  | HB2  | GLU | 67 | 28.878 | 4.881  | -1.934 | 1.00 | 0.00 | H |
| ATOM | 990  | HG2  | GLU | 67 | 30.989 | 6.910  | -2.609 | 1.00 | 0.00 | H |
| ATOM | 991  | N    | PHE | 68 | 27.157 | 5.139  | 0.256  | 1.00 | 0.00 | N |
| ATOM | 992  | CA   | PHE | 68 | 25.783 | 4.867  | 0.668  | 1.00 | 0.00 | C |
| ATOM | 993  | C    | PHE | 68 | 25.297 | 5.915  | 1.665  | 1.00 | 0.00 | C |
| ATOM | 994  | O    | PHE | 68 | 24.196 | 6.450  | 1.532  | 1.00 | 0.00 | O |
| ATOM | 995  | CB   | PHE | 68 | 25.682 | 3.471  | 1.287  | 1.00 | 0.00 | C |
| ATOM | 996  | CG   | PHE | 68 | 24.386 | 3.229  | 2.008  | 1.00 | 0.00 | C |
| ATOM | 997  | CD1  | PHE | 68 | 23.218 | 2.991  | 1.300  | 1.00 | 0.00 | C |
| ATOM | 998  | CE1  | PHE | 68 | 22.025 | 2.767  | 1.957  | 1.00 | 0.00 | C |
| ATOM | 999  | CZ   | PHE | 68 | 21.988 | 2.780  | 3.340  | 1.00 | 0.00 | C |
| ATOM | 1000 | CE2  | PHE | 68 | 23.143 | 3.015  | 4.057  | 1.00 | 0.00 | C |
| ATOM | 1001 | CD2  | PHE | 68 | 24.334 | 3.240  | 3.392  | 1.00 | 0.00 | C |
| ATOM | 1002 | H    | PHE | 68 | 27.807 | 4.404  | 0.247  | 1.00 | 0.00 | H |
| ATOM | 1003 | HA   | PHE | 68 | 25.159 | 4.908  | -0.212 | 1.00 | 0.00 | H |
| ATOM | 1004 | 2HB3 | PHE | 68 | 26.485 | 3.341  | 1.997  | 1.00 | 0.00 | H |
| ATOM | 1005 | 1HD  | PHE | 68 | 23.248 | 2.980  | 0.217  | 1.00 | 0.00 | H |
| ATOM | 1006 | 1HE  | PHE | 68 | 21.123 | 2.582  | 1.393  | 1.00 | 0.00 | H |
| ATOM | 1007 | HZ   | PHE | 68 | 21.054 | 2.604  | 3.857  | 1.00 | 0.00 | H |
| ATOM | 1008 | 2HE  | PHE | 68 | 23.116 | 3.026  | 5.136  | 1.00 | 0.00 | H |
| ATOM | 1009 | 2HD  | PHE | 68 | 25.238 | 3.424  | 3.955  | 1.00 | 0.00 | H |
| ATOM | 1010 | HB2  | PHE | 68 | 25.756 | 2.719  | 0.501  | 1.00 | 0.00 | H |
| ATOM | 1011 | N    | LEU | 69 | 26.125 | 6.205  | 2.662  | 1.00 | 0.00 | N |
| ATOM | 1012 | CA   | LEU | 69 | 25.781 | 7.189  | 3.682  | 1.00 | 0.00 | C |
| ATOM | 1013 | C    | LEU | 69 | 25.236 | 8.464  | 3.045  | 1.00 | 0.00 | C |
| ATOM | 1014 | O    | LEU | 69 | 24.402 | 9.155  | 3.630  | 1.00 | 0.00 | O |
| ATOM | 1015 | CB   | LEU | 69 | 27.005 | 7.516  | 4.539  | 1.00 | 0.00 | C |
| ATOM | 1016 | CG   | LEU | 69 | 27.733 | 6.318  | 5.154  | 1.00 | 0.00 | C |
| ATOM | 1017 | CD1  | LEU | 69 | 28.980 | 6.774  | 5.896  | 1.00 | 0.00 | C |
| ATOM | 1018 | CD2  | LEU | 69 | 26.804 | 5.553  | 6.087  | 1.00 | 0.00 | C |
| ATOM | 1019 | H    | LEU | 69 | 26.991 | 5.747  | 2.712  | 1.00 | 0.00 | H |
| ATOM | 1020 | HA   | LEU | 69 | 25.016 | 6.760  | 4.310  | 1.00 | 0.00 | H |
| ATOM | 1021 | 2HB3 | LEU | 69 | 26.682 | 8.157  | 5.345  | 1.00 | 0.00 | H |
| ATOM | 1022 | HG   | LEU | 69 | 28.040 | 5.646  | 4.365  | 1.00 | 0.00 | H |
| ATOM | 1023 | 1HD1 | LEU | 69 | 29.754 | 7.012  | 5.183  | 1.00 | 0.00 | H |
| ATOM | 1024 | 2HD1 | LEU | 69 | 29.320 | 5.983  | 6.547  | 1.00 | 0.00 | H |
| ATOM | 1025 | 3HD1 | LEU | 69 | 28.748 | 7.649  | 6.484  | 1.00 | 0.00 | H |
| ATOM | 1026 | 1HD2 | LEU | 69 | 25.960 | 6.177  | 6.346  | 1.00 | 0.00 | H |
| ATOM | 1027 | 2HD2 | LEU | 69 | 27.340 | 5.283  | 6.987  | 1.00 | 0.00 | H |
| ATOM | 1028 | 3HD2 | LEU | 69 | 26.453 | 4.660  | 5.594  | 1.00 | 0.00 | H |
| ATOM | 1029 | HB2  | LEU | 69 | 27.760 | 8.007  | 3.924  | 1.00 | 0.00 | H |
| ATOM | 1030 | N    | THR | 70 | 25.715 | 8.770  | 1.844  | 1.00 | 0.00 | N |
| ATOM | 1031 | CA   | THR | 70 | 25.277 | 9.962  | 1.127  | 1.00 | 0.00 | C |
| ATOM | 1032 | C    | THR | 70 | 23.798 | 9.875  | 0.770  | 1.00 | 0.00 | C |
| ATOM | 1033 | O    | THR | 70 | 23.041 | 10.821 | 0.986  | 1.00 | 0.00 | O |
| ATOM | 1034 | CB   | THR | 70 | 26.093 | 10.176 | -0.161 | 1.00 | 0.00 | C |
| ATOM | 1035 | OG1  | THR | 70 | 27.477 | 10.350 | 0.159  | 1.00 | 0.00 | O |
| ATOM | 1036 | CG2  | THR | 70 | 25.588 | 11.389 | -0.926 | 1.00 | 0.00 | C |
| ATOM | 1037 | H    | THR | 70 | 26.380 | 8.180  | 1.430  | 1.00 | 0.00 | H |
| ATOM | 1038 | HA   | THR | 70 | 25.432 | 10.815 | 1.772  | 1.00 | 0.00 | H |
| ATOM | 1039 | HB   | THR | 70 | 25.983 | 9.301  | -0.787 | 1.00 | 0.00 | H |
| ATOM | 1040 | 1HG  | THR | 70 | 27.708 | 9.785  | 0.900  | 1.00 | 0.00 | H |
| ATOM | 1041 | 1HG2 | THR | 70 | 25.717 | 11.225 | -1.986 | 1.00 | 0.00 | H |
| ATOM | 1042 | 2HG2 | THR | 70 | 26.147 | 12.263 | -0.626 | 1.00 | 0.00 | H |
| ATOM | 1043 | 3HG2 | THR | 70 | 24.542 | 11.539 | -0.711 | 1.00 | 0.00 | H |
| ATOM | 1044 | N    | MET | 71 | 23.392 | 8.735  | 0.221  | 1.00 | 0.00 | N |
| ATOM | 1045 | CA   | MET | 71 | 22.000 | 8.525  | -0.164 | 1.00 | 0.00 | C |
| ATOM | 1046 | C    | MET | 71 | 21.084 | 8.595  | 1.053  | 1.00 | 0.00 | C |
| ATOM | 1047 | O    | MET | 71 | 20.163 | 9.412  | 1.100  | 1.00 | 0.00 | O |
| ATOM | 1048 | CB   | MET | 71 | 21.841 | 7.173  | -0.859 | 1.00 | 0.00 | C |
| ATOM | 1049 | CG   | MET | 71 | 20.413 | 6.872  | -1.285 | 1.00 | 0.00 | C |
| ATOM | 1050 | SD   | MET | 71 | 20.217 | 5.201  | -1.932 | 1.00 | 0.00 | S |
| ATOM | 1051 | CE   | MET | 71 | 20.478 | 4.230  | -0.447 | 1.00 | 0.00 | C |
| ATOM | 1052 | H    | MET | 71 | 24.043 | 8.016  | 0.072  | 1.00 | 0.00 | H |
| ATOM | 1053 | HA   | MET | 71 | 21.726 | 9.309  | -0.853 | 1.00 | 0.00 | H |
| ATOM | 1054 | 2HB3 | MET | 71 | 22.165 | 6.393  | -0.186 | 1.00 | 0.00 | H |
| ATOM | 1055 | 2HG3 | MET | 71 | 20.124 | 7.577  | -2.050 | 1.00 | 0.00 | H |
| ATOM | 1056 | 1HE  | MET | 71 | 21.536 | 4.092  | -0.289 | 1.00 | 0.00 | H |
| ATOM | 1057 | 2HE  | MET | 71 | 20.050 | 4.748  | 0.398  | 1.00 | 0.00 | H |
| ATOM | 1058 | 3HE  | MET | 71 | 20.000 | 3.267  | -0.560 | 1.00 | 0.00 | H |

|      |      |      |     |    |        |        |        |      |      |   |
|------|------|------|-----|----|--------|--------|--------|------|------|---|
| ATOM | 1059 | HB2  | MET | 71 | 22.442 | 7.159  | -1.770 | 1.00 | 0.00 | H |
| ATOM | 1060 | HG2  | MET | 71 | 19.752 | 6.957  | -0.423 | 1.00 | 0.00 | H |
| ATOM | 1061 | N    | MET | 72 | 21.341 | 7.737  | 2.032  | 1.00 | 0.00 | N |
| ATOM | 1062 | CA   | MET | 72 | 20.537 | 7.704  | 3.250  | 1.00 | 0.00 | C |
| ATOM | 1063 | C    | MET | 72 | 20.164 | 9.115  | 3.692  | 1.00 | 0.00 | C |
| ATOM | 1064 | O    | MET | 72 | 19.175 | 9.312  | 4.399  | 1.00 | 0.00 | O |
| ATOM | 1065 | CB   | MET | 72 | 21.296 | 6.989  | 4.369  | 1.00 | 0.00 | C |
| ATOM | 1066 | CG   | MET | 72 | 21.198 | 5.473  | 4.296  | 1.00 | 0.00 | C |
| ATOM | 1067 | SD   | MET | 72 | 21.283 | 4.694  | 5.920  | 1.00 | 0.00 | S |
| ATOM | 1068 | CE   | MET | 72 | 19.675 | 5.121  | 6.585  | 1.00 | 0.00 | C |
| ATOM | 1069 | H    | MET | 72 | 22.088 | 7.111  | 1.937  | 1.00 | 0.00 | H |
| ATOM | 1070 | HA   | MET | 72 | 19.631 | 7.155  | 3.033  | 1.00 | 0.00 | H |
| ATOM | 1071 | 2HB3 | MET | 72 | 20.897 | 7.308  | 5.319  | 1.00 | 0.00 | H |
| ATOM | 1072 | 2HG3 | MET | 72 | 22.012 | 5.103  | 3.691  | 1.00 | 0.00 | H |
| ATOM | 1073 | 1HE  | MET | 72 | 19.435 | 6.140  | 6.319  | 1.00 | 0.00 | H |
| ATOM | 1074 | 2HE  | MET | 72 | 18.929 | 4.455  | 6.175  | 1.00 | 0.00 | H |
| ATOM | 1075 | 3HE  | MET | 72 | 19.695 | 5.024  | 7.661  | 1.00 | 0.00 | H |
| ATOM | 1076 | HB2  | MET | 72 | 22.356 | 7.232  | 4.302  | 1.00 | 0.00 | H |
| ATOM | 1077 | HG2  | MET | 72 | 20.242 | 5.191  | 3.857  | 1.00 | 0.00 | H |
| ATOM | 1078 | N    | ALA | 73 | 20.961 | 10.092 | 3.276  | 1.00 | 0.00 | N |
| ATOM | 1079 | CA   | ALA | 73 | 20.715 | 11.484 | 3.629  | 1.00 | 0.00 | C |
| ATOM | 1080 | C    | ALA | 73 | 19.676 | 12.109 | 2.702  | 1.00 | 0.00 | C |
| ATOM | 1081 | O    | ALA | 73 | 18.727 | 12.748 | 3.161  | 1.00 | 0.00 | O |
| ATOM | 1082 | CB   | ALA | 73 | 22.011 | 12.280 | 3.584  | 1.00 | 0.00 | C |
| ATOM | 1083 | H    | ALA | 73 | 21.735 | 9.871  | 2.716  | 1.00 | 0.00 | H |
| ATOM | 1084 | HA   | ALA | 73 | 20.341 | 11.509 | 4.643  | 1.00 | 0.00 | H |
| ATOM | 1085 | 1HB  | ALA | 73 | 22.810 | 11.643 | 3.228  | 1.00 | 0.00 | H |
| ATOM | 1086 | 2HB  | ALA | 73 | 21.895 | 13.119 | 2.914  | 1.00 | 0.00 | H |
| ATOM | 1087 | 3HB  | ALA | 73 | 22.248 | 12.637 | 4.574  | 1.00 | 0.00 | H |
| ATOM | 1088 | N    | ARG | 74 | 19.861 | 11.922 | 1.401  | 1.00 | 0.00 | N |
| ATOM | 1089 | CA   | ARG | 74 | 18.940 | 12.469 | 0.411  | 1.00 | 0.00 | C |
| ATOM | 1090 | C    | ARG | 74 | 17.665 | 11.635 | 0.336  | 1.00 | 0.00 | C |
| ATOM | 1091 | O    | ARG | 74 | 16.575 | 12.166 | 0.121  | 1.00 | 0.00 | O |
| ATOM | 1092 | CB   | ARG | 74 | 19.609 | 12.521 | -0.963 | 1.00 | 0.00 | C |
| ATOM | 1093 | CG   | ARG | 74 | 20.922 | 13.287 | -0.975 | 1.00 | 0.00 | C |
| ATOM | 1094 | CD   | ARG | 74 | 21.891 | 12.719 | -1.999 | 1.00 | 0.00 | C |
| ATOM | 1095 | NE   | ARG | 74 | 21.779 | 13.391 | -3.290 | 1.00 | 0.00 | N |
| ATOM | 1096 | CZ   | ARG | 74 | 22.432 | 14.507 | -3.595 | 1.00 | 0.00 | C |
| ATOM | 1097 | NH1  | ARG | 74 | 23.239 | 15.072 | -2.709 | 1.00 | 0.00 | N |
| ATOM | 1098 | NH2  | ARG | 74 | 22.278 | 15.060 | -4.792 | 1.00 | 0.00 | N |
| ATOM | 1099 | H    | ARG | 74 | 20.635 | 11.403 | 1.098  | 1.00 | 0.00 | H |
| ATOM | 1100 | HA   | ARG | 74 | 18.684 | 13.471 | 0.716  | 1.00 | 0.00 | H |
| ATOM | 1101 | 2HB3 | ARG | 74 | 18.935 | 12.997 | -1.660 | 1.00 | 0.00 | H |
| ATOM | 1102 | 2HG3 | ARG | 74 | 21.371 | 13.227 | 0.007  | 1.00 | 0.00 | H |
| ATOM | 1103 | 2HD3 | ARG | 74 | 21.679 | 11.668 | -2.131 | 1.00 | 0.00 | H |
| ATOM | 1104 | HE   | ARG | 74 | 21.188 | 12.991 | -3.960 | 1.00 | 0.00 | H |
| ATOM | 1105 | 1HH1 | ARG | 74 | 23.357 | 14.657 | -1.807 | 1.00 | 0.00 | H |
| ATOM | 1106 | 2HH1 | ARG | 74 | 23.729 | 15.913 | -2.943 | 1.00 | 0.00 | H |
| ATOM | 1107 | 1HH2 | ARG | 74 | 21.672 | 14.638 | -5.464 | 1.00 | 0.00 | H |
| ATOM | 1108 | 2HH2 | ARG | 74 | 22.769 | 15.899 | -5.021 | 1.00 | 0.00 | H |
| ATOM | 1109 | HB2  | ARG | 74 | 19.842 | 11.509 | -1.295 | 1.00 | 0.00 | H |
| ATOM | 1110 | HG2  | ARG | 74 | 20.733 | 14.328 | -1.234 | 1.00 | 0.00 | H |
| ATOM | 1111 | HD2  | ARG | 74 | 22.913 | 12.855 | -1.647 | 1.00 | 0.00 | H |
| ATOM | 1112 | N    | LYS | 75 | 17.806 | 10.327 | 0.514  | 1.00 | 0.00 | N |
| ATOM | 1113 | CA   | LYS | 75 | 16.666 | 9.420  | 0.469  | 1.00 | 0.00 | C |
| ATOM | 1114 | C    | LYS | 75 | 15.733 | 9.658  | 1.652  | 1.00 | 0.00 | C |
| ATOM | 1115 | O    | LYS | 75 | 14.593 | 9.194  | 1.656  | 1.00 | 0.00 | O |
| ATOM | 1116 | CB   | LYS | 75 | 17.147 | 7.965  | 0.468  | 1.00 | 0.00 | C |
| ATOM | 1117 | CG   | LYS | 75 | 16.022 | 6.954  | 0.317  | 1.00 | 0.00 | C |
| ATOM | 1118 | CD   | LYS | 75 | 15.327 | 7.092  | -1.028 | 1.00 | 0.00 | C |
| ATOM | 1119 | CE   | LYS | 75 | 16.234 | 6.665  | -2.171 | 1.00 | 0.00 | C |
| ATOM | 1120 | NZ   | LYS | 75 | 17.032 | 7.805  | -2.701 | 1.00 | 0.00 | N |
| ATOM | 1121 | H    | LYS | 75 | 18.701 | 9.963  | 0.682  | 1.00 | 0.00 | H |
| ATOM | 1122 | HA   | LYS | 75 | 16.127 | 9.610  | -0.448 | 1.00 | 0.00 | H |
| ATOM | 1123 | 2HB3 | LYS | 75 | 17.657 | 7.768  | 1.400  | 1.00 | 0.00 | H |
| ATOM | 1124 | 2HG3 | LYS | 75 | 15.299 | 7.115  | 1.105  | 1.00 | 0.00 | H |
| ATOM | 1125 | 2HD3 | LYS | 75 | 15.042 | 8.124  | -1.171 | 1.00 | 0.00 | H |
| ATOM | 1126 | 2HE3 | LYS | 75 | 15.624 | 6.262  | -2.966 | 1.00 | 0.00 | H |
| ATOM | 1127 | 1HZ  | LYS | 75 | 16.582 | 8.187  | -3.556 | 1.00 | 0.00 | H |
| ATOM | 1128 | 2HZ  | LYS | 75 | 17.992 | 7.487  | -2.942 | 1.00 | 0.00 | H |
| ATOM | 1129 | 3HZ  | LYS | 75 | 17.096 | 8.558  | -1.989 | 1.00 | 0.00 | H |
| ATOM | 1130 | HB2  | LYS | 75 | 17.820 | 7.804  | -0.374 | 1.00 | 0.00 | H |
| ATOM | 1131 | HG2  | LYS | 75 | 16.428 | 5.946  | 0.382  | 1.00 | 0.00 | H |
| ATOM | 1132 | HD2  | LYS | 75 | 14.443 | 6.453  | -1.048 | 1.00 | 0.00 | H |
| ATOM | 1133 | HE2  | LYS | 75 | 16.935 | 5.909  | -1.816 | 1.00 | 0.00 | H |
| ATOM | 1134 | N    | MET | 76 | 16.224 | 10.385 | 2.648  | 1.00 | 0.00 | N |
| ATOM | 1135 | CA   | MET | 76 | 15.432 | 10.687 | 3.835  | 1.00 | 0.00 | C |

|      |      |      |     |    |        |        |        |      |      |   |
|------|------|------|-----|----|--------|--------|--------|------|------|---|
| ATOM | 1136 | C    | MET | 76 | 14.319 | 11.677 | 3.509  | 1.00 | 0.00 | C |
| ATOM | 1137 | O    | MET | 76 | 13.246 | 11.644 | 4.113  | 1.00 | 0.00 | O |
| ATOM | 1138 | CB   | MET | 76 | 16.324 | 11.253 | 4.941  | 1.00 | 0.00 | C |
| ATOM | 1139 | CG   | MET | 76 | 16.778 | 10.211 | 5.950  | 1.00 | 0.00 | C |
| ATOM | 1140 | SD   | MET | 76 | 15.415 | 9.548  | 6.926  | 1.00 | 0.00 | S |
| ATOM | 1141 | CE   | MET | 76 | 15.239 | 7.918  | 6.202  | 1.00 | 0.00 | C |
| ATOM | 1142 | H    | MET | 76 | 17.140 | 10.727 | 2.586  | 1.00 | 0.00 | H |
| ATOM | 1143 | HA   | MET | 76 | 14.987 | 9.766  | 4.179  | 1.00 | 0.00 | H |
| ATOM | 1144 | 2HB3 | MET | 76 | 15.779 | 12.019 | 5.471  | 1.00 | 0.00 | H |
| ATOM | 1145 | 2HG3 | MET | 76 | 17.495 | 10.663 | 6.617  | 1.00 | 0.00 | H |
| ATOM | 1146 | 1HE  | MET | 76 | 15.156 | 8.009  | 5.129  | 1.00 | 0.00 | H |
| ATOM | 1147 | 2HE  | MET | 76 | 16.105 | 7.321  | 6.446  | 1.00 | 0.00 | H |
| ATOM | 1148 | 3HE  | MET | 76 | 14.351 | 7.446  | 6.593  | 1.00 | 0.00 | H |
| ATOM | 1149 | HB2  | MET | 76 | 17.231 | 11.668 | 4.500  | 1.00 | 0.00 | H |
| ATOM | 1150 | HG2  | MET | 76 | 17.228 | 9.367  | 5.425  | 1.00 | 0.00 | H |
| ATOM | 1151 | N    | LYS | 77 | 14.578 | 12.557 | 2.547  | 1.00 | 0.00 | N |
| ATOM | 1152 | CA   | LYS | 77 | 13.600 | 13.557 | 2.139  | 1.00 | 0.00 | C |
| ATOM | 1153 | C    | LYS | 77 | 12.686 | 13.008 | 1.046  | 1.00 | 0.00 | C |
| ATOM | 1154 | O    | LYS | 77 | 11.513 | 13.371 | 0.964  | 1.00 | 0.00 | O |
| ATOM | 1155 | CB   | LYS | 77 | 14.307 | 14.820 | 1.640  | 1.00 | 0.00 | C |
| ATOM | 1156 | CG   | LYS | 77 | 14.757 | 14.733 | 0.190  | 1.00 | 0.00 | C |
| ATOM | 1157 | CD   | LYS | 77 | 13.676 | 15.230 | -0.757 | 1.00 | 0.00 | C |
| ATOM | 1158 | CE   | LYS | 77 | 13.602 | 16.749 | -0.770 | 1.00 | 0.00 | C |
| ATOM | 1159 | NZ   | LYS | 77 | 14.773 | 17.356 | -1.463 | 1.00 | 0.00 | N |
| ATOM | 1160 | H    | LYS | 77 | 15.452 | 12.534 | 2.101  | 1.00 | 0.00 | H |
| ATOM | 1161 | HA   | LYS | 77 | 13.000 | 13.807 | 3.000  | 1.00 | 0.00 | H |
| ATOM | 1162 | 2HB3 | LYS | 77 | 15.177 | 14.994 | 2.255  | 1.00 | 0.00 | H |
| ATOM | 1163 | 2HG3 | LYS | 77 | 14.984 | 13.704 | -0.045 | 1.00 | 0.00 | H |
| ATOM | 1164 | 2HD3 | LYS | 77 | 12.721 | 14.833 | -0.442 | 1.00 | 0.00 | H |
| ATOM | 1165 | 2HE3 | LYS | 77 | 13.575 | 17.104 | 0.249  | 1.00 | 0.00 | H |
| ATOM | 1166 | 1HZ  | LYS | 77 | 15.378 | 17.849 | -0.775 | 1.00 | 0.00 | H |
| ATOM | 1167 | 2HZ  | LYS | 77 | 14.450 | 18.040 | -2.175 | 1.00 | 0.00 | H |
| ATOM | 1168 | 3HZ  | LYS | 77 | 15.331 | 16.617 | -1.936 | 1.00 | 0.00 | H |
| ATOM | 1169 | HB2  | LYS | 77 | 13.623 | 15.667 | 1.699  | 1.00 | 0.00 | H |
| ATOM | 1170 | HG2  | LYS | 77 | 15.641 | 15.354 | 0.047  | 1.00 | 0.00 | H |
| ATOM | 1171 | HD2  | LYS | 77 | 13.901 | 14.898 | -1.770 | 1.00 | 0.00 | H |
| ATOM | 1172 | HE2  | LYS | 77 | 12.705 | 17.065 | -1.302 | 1.00 | 0.00 | H |
| ATOM | 1173 | N    | ASP | 78 | 13.231 | 12.132 | 0.210  | 1.00 | 0.00 | N |
| ATOM | 1174 | CA   | ASP | 78 | 12.464 | 11.531 | -0.875 | 1.00 | 0.00 | C |
| ATOM | 1175 | C    | ASP | 78 | 11.198 | 10.869 | -0.344 | 1.00 | 0.00 | C |
| ATOM | 1176 | O    | ASP | 78 | 10.169 | 10.838 | -1.021 | 1.00 | 0.00 | O |
| ATOM | 1177 | CB   | ASP | 78 | 13.317 | 10.503 | -1.622 | 1.00 | 0.00 | C |
| ATOM | 1178 | CG   | ASP | 78 | 14.184 | 11.138 | -2.694 | 1.00 | 0.00 | C |
| ATOM | 1179 | OD1  | ASP | 78 | 14.617 | 12.293 | -2.498 | 1.00 | 0.00 | O |
| ATOM | 1180 | OD2  | ASP | 78 | 14.425 | 10.480 | -3.728 | 1.00 | 0.00 | O |
| ATOM | 1181 | H    | ASP | 78 | 14.172 | 11.881 | 0.328  | 1.00 | 0.00 | H |
| ATOM | 1182 | HA   | ASP | 78 | 12.185 | 12.319 | -1.559 | 1.00 | 0.00 | H |
| ATOM | 1183 | 2HB3 | ASP | 78 | 12.668 | 9.780  | -2.092 | 1.00 | 0.00 | H |
| ATOM | 1184 | HB2  | ASP | 78 | 13.984 | 10.003 | -0.919 | 1.00 | 0.00 | H |
| ATOM | 1185 | N    | THR | 79 | 11.279 | 10.338 | 0.873  | 1.00 | 0.00 | N |
| ATOM | 1186 | CA   | THR | 79 | 10.141 | 9.675  | 1.494  | 1.00 | 0.00 | C |
| ATOM | 1187 | C    | THR | 79 | 9.213  | 10.683 | 2.163  | 1.00 | 0.00 | C |
| ATOM | 1188 | O    | THR | 79 | 8.049  | 10.386 | 2.435  | 1.00 | 0.00 | O |
| ATOM | 1189 | CB   | THR | 79 | 10.596 | 8.640  | 2.542  | 1.00 | 0.00 | C |
| ATOM | 1190 | OG1  | THR | 79 | 11.425 | 7.650  | 1.923  | 1.00 | 0.00 | O |
| ATOM | 1191 | CG2  | THR | 79 | 9.397  | 7.969  | 3.196  | 1.00 | 0.00 | C |
| ATOM | 1192 | H    | THR | 79 | 12.126 | 10.394 | 1.362  | 1.00 | 0.00 | H |
| ATOM | 1193 | HA   | THR | 79 | 9.593  | 9.155  | 0.720  | 1.00 | 0.00 | H |
| ATOM | 1194 | HB   | THR | 79 | 11.165 | 9.150  | 3.305  | 1.00 | 0.00 | H |
| ATOM | 1195 | 1HG  | THR | 79 | 11.755 | 7.985  | 1.087  | 1.00 | 0.00 | H |
| ATOM | 1196 | 1HG2 | THR | 79 | 9.740  | 7.201  | 3.872  | 1.00 | 0.00 | H |
| ATOM | 1197 | 2HG2 | THR | 79 | 8.773  | 7.526  | 2.436  | 1.00 | 0.00 | H |
| ATOM | 1198 | 3HG2 | THR | 79 | 8.830  | 8.704  | 3.746  | 1.00 | 0.00 | H |
| ATOM | 1199 | N    | ASP | 80 | 9.736  | 11.877 | 2.425  | 1.00 | 0.00 | N |
| ATOM | 1200 | CA   | ASP | 80 | 8.953  | 12.929 | 3.059  | 1.00 | 0.00 | C |
| ATOM | 1201 | C    | ASP | 80 | 7.538  | 12.972 | 2.494  | 1.00 | 0.00 | C |
| ATOM | 1202 | O    | ASP | 80 | 6.585  | 13.296 | 3.202  | 1.00 | 0.00 | O |
| ATOM | 1203 | CB   | ASP | 80 | 9.634  | 14.286 | 2.867  | 1.00 | 0.00 | C |
| ATOM | 1204 | CG   | ASP | 80 | 9.239  | 15.289 | 3.934  | 1.00 | 0.00 | C |
| ATOM | 1205 | OD1  | ASP | 80 | 8.186  | 15.941 | 3.774  | 1.00 | 0.00 | O |
| ATOM | 1206 | OD2  | ASP | 80 | 9.983  | 15.420 | 4.927  | 1.00 | 0.00 | O |
| ATOM | 1207 | H    | ASP | 80 | 10.669 | 12.052 | 2.184  | 1.00 | 0.00 | H |
| ATOM | 1208 | HA   | ASP | 80 | 8.899  | 12.713 | 4.116  | 1.00 | 0.00 | H |
| ATOM | 1209 | 2HB3 | ASP | 80 | 9.358  | 14.686 | 1.903  | 1.00 | 0.00 | H |
| ATOM | 1210 | HB2  | ASP | 80 | 10.717 | 14.162 | 2.920  | 1.00 | 0.00 | H |
| ATOM | 1211 | N    | SER | 81 | 7.407  | 12.645 | 1.213  | 1.00 | 0.00 | N |
| ATOM | 1212 | CA   | SER | 81 | 6.110  | 12.649 | 0.550  | 1.00 | 0.00 | C |

|      |      |      |     |    |        |        |        |      |      |   |
|------|------|------|-----|----|--------|--------|--------|------|------|---|
| ATOM | 1213 | C    | SER | 81 | 5.019  | 12.136 | 1.486  | 1.00 | 0.00 | C |
| ATOM | 1214 | O    | SER | 81 | 3.859  | 12.536 | 1.384  | 1.00 | 0.00 | O |
| ATOM | 1215 | CB   | SER | 81 | 6.154  | 11.792 | -0.716 | 1.00 | 0.00 | C |
| ATOM | 1216 | OG   | SER | 81 | 7.103  | 12.298 | -1.640 | 1.00 | 0.00 | O |
| ATOM | 1217 | H    | SER | 81 | 8.206  | 12.396 | 0.699  | 1.00 | 0.00 | H |
| ATOM | 1218 | HA   | SER | 81 | 5.879  | 13.668 | 0.276  | 1.00 | 0.00 | H |
| ATOM | 1219 | 2HB3 | SER | 81 | 5.180  | 11.791 | -1.184 | 1.00 | 0.00 | H |
| ATOM | 1220 | HG   | SER | 81 | 7.909  | 11.779 | -1.588 | 1.00 | 0.00 | H |
| ATOM | 1221 | HB2  | SER | 81 | 6.434  | 10.771 | -0.454 | 1.00 | 0.00 | H |
| ATOM | 1222 | N    | GLU | 82 | 5.401  | 11.246 | 2.397  | 1.00 | 0.00 | N |
| ATOM | 1223 | CA   | GLU | 82 | 4.457  | 10.676 | 3.352  | 1.00 | 0.00 | C |
| ATOM | 1224 | C    | GLU | 82 | 3.383  | 11.693 | 3.727  | 1.00 | 0.00 | C |
| ATOM | 1225 | O    | GLU | 82 | 2.190  | 11.415 | 3.621  | 1.00 | 0.00 | O |
| ATOM | 1226 | CB   | GLU | 82 | 5.191  | 10.205 | 4.610  | 1.00 | 0.00 | C |
| ATOM | 1227 | CG   | GLU | 82 | 4.268  | 9.626  | 5.669  | 1.00 | 0.00 | C |
| ATOM | 1228 | CD   | GLU | 82 | 4.974  | 9.399  | 6.994  | 1.00 | 0.00 | C |
| ATOM | 1229 | OE1  | GLU | 82 | 5.945  | 10.130 | 7.283  | 1.00 | 0.00 | O |
| ATOM | 1230 | OE2  | GLU | 82 | 4.553  | 8.491  | 7.740  | 1.00 | 0.00 | O |
| ATOM | 1231 | H    | GLU | 82 | 6.341  | 10.967 | 2.429  | 1.00 | 0.00 | H |
| ATOM | 1232 | HA   | GLU | 82 | 3.984  | 9.827  | 2.882  | 1.00 | 0.00 | H |
| ATOM | 1233 | 2HB3 | GLU | 82 | 5.717  | 11.044 | 5.039  | 1.00 | 0.00 | H |
| ATOM | 1234 | 2HG3 | GLU | 82 | 3.886  | 8.680  | 5.316  | 1.00 | 0.00 | H |
| ATOM | 1235 | HB2  | GLU | 82 | 5.887  | 9.410  | 4.348  | 1.00 | 0.00 | H |
| ATOM | 1236 | HG2  | GLU | 82 | 3.447  | 10.319 | 5.855  | 1.00 | 0.00 | H |
| ATOM | 1237 | N    | GLU | 83 | 3.817  | 12.870 | 4.166  | 1.00 | 0.00 | N |
| ATOM | 1238 | CA   | GLU | 83 | 2.894  | 13.926 | 4.558  | 1.00 | 0.00 | C |
| ATOM | 1239 | C    | GLU | 83 | 1.952  | 14.281 | 3.410  | 1.00 | 0.00 | C |
| ATOM | 1240 | O    | GLU | 83 | 0.731  | 14.285 | 3.574  | 1.00 | 0.00 | O |
| ATOM | 1241 | CB   | GLU | 83 | 3.665  | 15.172 | 5.001  | 1.00 | 0.00 | C |
| ATOM | 1242 | CG   | GLU | 83 | 4.589  | 14.926 | 6.181  | 1.00 | 0.00 | C |
| ATOM | 1243 | CD   | GLU | 83 | 4.788  | 16.167 | 7.034  | 1.00 | 0.00 | C |
| ATOM | 1244 | OE1  | GLU | 83 | 4.902  | 17.269 | 6.459  | 1.00 | 0.00 | O |
| ATOM | 1245 | OE2  | GLU | 83 | 4.832  | 16.032 | 8.275  | 1.00 | 0.00 | O |
| ATOM | 1246 | H    | GLU | 83 | 4.782  | 13.031 | 4.228  | 1.00 | 0.00 | H |
| ATOM | 1247 | HA   | GLU | 83 | 2.307  | 13.564 | 5.390  | 1.00 | 0.00 | H |
| ATOM | 1248 | 2HB3 | GLU | 83 | 2.957  | 15.939 | 5.278  | 1.00 | 0.00 | H |
| ATOM | 1249 | 2HG3 | GLU | 83 | 5.550  | 14.604 | 5.811  | 1.00 | 0.00 | H |
| ATOM | 1250 | HB2  | GLU | 83 | 4.300  | 15.517 | 4.185  | 1.00 | 0.00 | H |
| ATOM | 1251 | HG2  | GLU | 83 | 4.159  | 14.161 | 6.827  | 1.00 | 0.00 | H |
| ATOM | 1252 | N    | GLU | 84 | 2.528  | 14.575 | 2.251  | 1.00 | 0.00 | N |
| ATOM | 1253 | CA   | GLU | 84 | 1.741  | 14.931 | 1.074  | 1.00 | 0.00 | C |
| ATOM | 1254 | C    | GLU | 84 | 0.483  | 14.071 | 0.983  | 1.00 | 0.00 | C |
| ATOM | 1255 | O    | GLU | 84 | -0.531 | 14.495 | 0.426  | 1.00 | 0.00 | O |
| ATOM | 1256 | CB   | GLU | 84 | 2.579  | 14.770 | -0.196 | 1.00 | 0.00 | C |
| ATOM | 1257 | CG   | GLU | 84 | 3.699  | 15.786 | -0.319 | 1.00 | 0.00 | C |
| ATOM | 1258 | CD   | GLU | 84 | 3.195  | 17.174 | -0.666 | 1.00 | 0.00 | C |
| ATOM | 1259 | OE1  | GLU | 84 | 3.033  | 17.461 | -1.872 | 1.00 | 0.00 | O |
| ATOM | 1260 | OE2  | GLU | 84 | 2.962  | 17.971 | 0.265  | 1.00 | 0.00 | O |
| ATOM | 1261 | H    | GLU | 84 | 3.505  | 14.554 | 2.182  | 1.00 | 0.00 | H |
| ATOM | 1262 | HA   | GLU | 84 | 1.447  | 15.965 | 1.173  | 1.00 | 0.00 | H |
| ATOM | 1263 | 2HB3 | GLU | 84 | 1.931  | 14.874 | -1.054 | 1.00 | 0.00 | H |
| ATOM | 1264 | 2HG3 | GLU | 84 | 4.380  | 15.463 | -1.092 | 1.00 | 0.00 | H |
| ATOM | 1265 | HB2  | GLU | 84 | 3.055  | 13.792 | -0.195 | 1.00 | 0.00 | H |
| ATOM | 1266 | HG2  | GLU | 84 | 4.226  | 15.864 | 0.633  | 1.00 | 0.00 | H |
| ATOM | 1267 | N    | ILE | 85 | 0.558  | 12.862 | 1.527  | 1.00 | 0.00 | N |
| ATOM | 1268 | CA   | ILE | 85 | -0.571 | 11.942 | 1.506  | 1.00 | 0.00 | C |
| ATOM | 1269 | C    | ILE | 85 | -1.482 | 12.165 | 2.708  | 1.00 | 0.00 | C |
| ATOM | 1270 | O    | ILE | 85 | -2.706 | 12.059 | 2.602  | 1.00 | 0.00 | O |
| ATOM | 1271 | CB   | ILE | 85 | -0.103 | 10.475 | 1.493  | 1.00 | 0.00 | C |
| ATOM | 1272 | CG2  | ILE | 85 | -1.298 | 9.539  | 1.384  | 1.00 | 0.00 | C |
| ATOM | 1273 | CG1  | ILE | 85 | 0.874  | 10.238 | 0.342  | 1.00 | 0.00 | C |
| ATOM | 1274 | CD1  | ILE | 85 | 1.487  | 8.856  | 0.343  | 1.00 | 0.00 | C |
| ATOM | 1275 | H    | ILE | 85 | 1.395  | 12.582 | 1.955  | 1.00 | 0.00 | H |
| ATOM | 1276 | HA   | ILE | 85 | -1.134 | 12.128 | 0.603  | 1.00 | 0.00 | H |
| ATOM | 1277 | HB   | ILE | 85 | 0.397  | 10.272 | 2.430  | 1.00 | 0.00 | H |
| ATOM | 1278 | 1HG2 | ILE | 85 | -1.965 | 9.897  | 0.612  | 1.00 | 0.00 | H |
| ATOM | 1279 | 2HG2 | ILE | 85 | -0.956 | 8.547  | 1.130  | 1.00 | 0.00 | H |
| ATOM | 1280 | 3HG2 | ILE | 85 | -1.821 | 9.510  | 2.327  | 1.00 | 0.00 | H |
| ATOM | 1281 | 2HG3 | ILE | 85 | 1.677  | 10.957 | 0.407  | 1.00 | 0.00 | H |
| ATOM | 1282 | 1HD1 | ILE | 85 | 1.059  | 8.272  | 1.146  | 1.00 | 0.00 | H |
| ATOM | 1283 | 2HD1 | ILE | 85 | 1.286  | 8.370  | -0.599 | 1.00 | 0.00 | H |
| ATOM | 1284 | 3HD1 | ILE | 85 | 2.556  | 8.934  | 0.488  | 1.00 | 0.00 | H |
| ATOM | 1285 | HG2  | ILE | 85 | 0.351  | 10.352 | -0.607 | 1.00 | 0.00 | H |
| ATOM | 1286 | N    | ARG | 86 | -0.880 | 12.473 | 3.853  | 1.00 | 0.00 | N |
| ATOM | 1287 | CA   | ARG | 86 | -1.636 | 12.709 | 5.075  | 1.00 | 0.00 | C |
| ATOM | 1288 | C    | ARG | 86 | -2.902 | 13.511 | 4.784  | 1.00 | 0.00 | C |
| ATOM | 1289 | O    | ARG | 86 | -4.010 | 13.064 | 5.074  | 1.00 | 0.00 | O |

|      |      |      |     |    |         |        |        |      |      |   |
|------|------|------|-----|----|---------|--------|--------|------|------|---|
| ATOM | 1290 | CB   | ARG | 86 | -0.775  | 13.452 | 6.099  | 1.00 | 0.00 | C |
| ATOM | 1291 | CG   | ARG | 86 | 0.266   | 12.570 | 6.772  | 1.00 | 0.00 | C |
| ATOM | 1292 | CD   | ARG | 86 | -0.274  | 11.952 | 8.052  | 1.00 | 0.00 | C |
| ATOM | 1293 | NE   | ARG | 86 | -0.596  | 12.965 | 9.054  | 1.00 | 0.00 | N |
| ATOM | 1294 | CZ   | ARG | 86 | -0.625  | 12.726 | 10.360 | 1.00 | 0.00 | C |
| ATOM | 1295 | NH1  | ARG | 86 | -0.350  | 11.513 | 10.821 | 1.00 | 0.00 | N |
| ATOM | 1296 | NH2  | ARG | 86 | -0.929  | 13.700 | 11.210 | 1.00 | 0.00 | N |
| ATOM | 1297 | H    | ARG | 86 | 0.098   | 12.542 | 3.873  | 1.00 | 0.00 | H |
| ATOM | 1298 | HA   | ARG | 86 | -1.918  | 11.751 | 5.483  | 1.00 | 0.00 | H |
| ATOM | 1299 | 2HB3 | ARG | 86 | -1.415  | 13.862 | 6.863  | 1.00 | 0.00 | H |
| ATOM | 1300 | 2HG3 | ARG | 86 | 1.133   | 13.168 | 7.006  | 1.00 | 0.00 | H |
| ATOM | 1301 | 2HD3 | ARG | 86 | 0.473   | 11.286 | 8.457  | 1.00 | 0.00 | H |
| ATOM | 1302 | HE   | ARG | 86 | -0.804  | 13.868 | 8.736  | 1.00 | 0.00 | H |
| ATOM | 1303 | 1HH1 | ARG | 86 | -0.121  | 10.777 | 10.183 | 1.00 | 0.00 | H |
| ATOM | 1304 | 2HH1 | ARG | 86 | -0.371  | 11.335 | 11.805 | 1.00 | 0.00 | H |
| ATOM | 1305 | 1HH2 | ARG | 86 | -1.136  | 14.613 | 10.866 | 1.00 | 0.00 | H |
| ATOM | 1306 | 2HH2 | ARG | 86 | -0.949  | 13.517 | 12.191 | 1.00 | 0.00 | H |
| ATOM | 1307 | HB2  | ARG | 86 | -0.221  | 14.247 | 5.599  | 1.00 | 0.00 | H |
| ATOM | 1308 | HG2  | ARG | 86 | 0.543   | 11.758 | 6.099  | 1.00 | 0.00 | H |
| ATOM | 1309 | HD2  | ARG | 86 | -1.190  | 11.405 | 7.835  | 1.00 | 0.00 | H |
| ATOM | 1310 | N    | GLU | 87 | -2.725  | 14.699 | 4.211  | 1.00 | 0.00 | N |
| ATOM | 1311 | CA   | GLU | 87 | -3.853  | 15.563 | 3.883  | 1.00 | 0.00 | C |
| ATOM | 1312 | C    | GLU | 87 | -5.057  | 14.739 | 3.435  | 1.00 | 0.00 | C |
| ATOM | 1313 | O    | GLU | 87 | -6.161  | 14.902 | 3.954  | 1.00 | 0.00 | O |
| ATOM | 1314 | CB   | GLU | 87 | -3.463  | 16.554 | 2.785  | 1.00 | 0.00 | C |
| ATOM | 1315 | CG   | GLU | 87 | -2.404  | 17.554 | 3.217  | 1.00 | 0.00 | C |
| ATOM | 1316 | CD   | GLU | 87 | -2.980  | 18.701 | 4.023  | 1.00 | 0.00 | C |
| ATOM | 1317 | OE1  | GLU | 87 | -3.739  | 19.509 | 3.449  | 1.00 | 0.00 | O |
| ATOM | 1318 | OE2  | GLU | 87 | -2.671  | 18.791 | 5.231  | 1.00 | 0.00 | O |
| ATOM | 1319 | H    | GLU | 87 | -1.817  | 15.000 | 4.005  | 1.00 | 0.00 | H |
| ATOM | 1320 | HA   | GLU | 87 | -4.121  | 16.114 | 4.772  | 1.00 | 0.00 | H |
| ATOM | 1321 | 2HB3 | GLU | 87 | -4.343  | 17.101 | 2.483  | 1.00 | 0.00 | H |
| ATOM | 1322 | 2HG3 | GLU | 87 | -1.928  | 17.958 | 2.335  | 1.00 | 0.00 | H |
| ATOM | 1323 | HB2  | GLU | 87 | -3.043  | 16.011 | 1.938  | 1.00 | 0.00 | H |
| ATOM | 1324 | HG2  | GLU | 87 | -1.667  | 17.055 | 3.846  | 1.00 | 0.00 | H |
| ATOM | 1325 | N    | ALA | 88 | -4.836  | 13.854 | 2.469  | 1.00 | 0.00 | N |
| ATOM | 1326 | CA   | ALA | 88 | -5.902  | 13.004 | 1.954  | 1.00 | 0.00 | C |
| ATOM | 1327 | C    | ALA | 88 | -6.566  | 12.214 | 3.074  | 1.00 | 0.00 | C |
| ATOM | 1328 | O    | ALA | 88 | -7.792  | 12.192 | 3.190  | 1.00 | 0.00 | O |
| ATOM | 1329 | CB   | ALA | 88 | -5.355  | 12.059 | 0.892  | 1.00 | 0.00 | C |
| ATOM | 1330 | H    | ALA | 88 | -3.934  | 13.769 | 2.097  | 1.00 | 0.00 | H |
| ATOM | 1331 | HA   | ALA | 88 | -6.639  | 13.640 | 1.488  | 1.00 | 0.00 | H |
| ATOM | 1332 | 1HB  | ALA | 88 | -4.410  | 11.655 | 1.225  | 1.00 | 0.00 | H |
| ATOM | 1333 | 2HB  | ALA | 88 | -6.056  | 11.255 | 0.732  | 1.00 | 0.00 | H |
| ATOM | 1334 | 3HB  | ALA | 88 | -5.210  | 12.600 | -0.030 | 1.00 | 0.00 | H |
| ATOM | 1335 | N    | PHE | 89 | -5.752  | 11.565 | 3.902  | 1.00 | 0.00 | N |
| ATOM | 1336 | CA   | PHE | 89 | -6.261  | 10.774 | 5.013  | 1.00 | 0.00 | C |
| ATOM | 1337 | C    | PHE | 89 | -7.240  | 11.586 | 5.855  | 1.00 | 0.00 | C |
| ATOM | 1338 | O    | PHE | 89 | -8.293  | 11.087 | 6.255  | 1.00 | 0.00 | O |
| ATOM | 1339 | CB   | PHE | 89 | -5.105  | 10.280 | 5.888  | 1.00 | 0.00 | C |
| ATOM | 1340 | CG   | PHE | 89 | -5.511  | 9.981  | 7.303  | 1.00 | 0.00 | C |
| ATOM | 1341 | CD1  | PHE | 89 | -6.134  | 8.788  | 7.621  | 1.00 | 0.00 | C |
| ATOM | 1342 | CE1  | PHE | 89 | -6.509  | 8.511  | 8.923  | 1.00 | 0.00 | C |
| ATOM | 1343 | CZ   | PHE | 89 | -6.259  | 9.432  | 9.923  | 1.00 | 0.00 | C |
| ATOM | 1344 | CE2  | PHE | 89 | -5.636  | 10.626 | 9.618  | 1.00 | 0.00 | C |
| ATOM | 1345 | CD2  | PHE | 89 | -5.266  | 10.897 | 8.314  | 1.00 | 0.00 | C |
| ATOM | 1346 | H    | PHE | 89 | -4.782  | 11.623 | 3.756  | 1.00 | 0.00 | H |
| ATOM | 1347 | HA   | PHE | 89 | -6.779  | 9.920  | 4.602  | 1.00 | 0.00 | H |
| ATOM | 1348 | 2HB3 | PHE | 89 | -4.336  | 11.037 | 5.913  | 1.00 | 0.00 | H |
| ATOM | 1349 | 1HD  | PHE | 89 | -6.330  | 8.067  | 6.842  | 1.00 | 0.00 | H |
| ATOM | 1350 | 1HE  | PHE | 89 | -6.994  | 7.576  | 9.160  | 1.00 | 0.00 | H |
| ATOM | 1351 | HZ   | PHE | 89 | -6.550  | 9.218  | 10.940 | 1.00 | 0.00 | H |
| ATOM | 1352 | 2HE  | PHE | 89 | -5.441  | 11.347 | 10.396 | 1.00 | 0.00 | H |
| ATOM | 1353 | 2HD  | PHE | 89 | -4.779  | 11.834 | 8.077  | 1.00 | 0.00 | H |
| ATOM | 1354 | HB2  | PHE | 89 | -4.708  | 9.353  | 5.477  | 1.00 | 0.00 | H |
| ATOM | 1355 | N    | ARG | 90 | -6.885  | 12.839 | 6.120  | 1.00 | 0.00 | N |
| ATOM | 1356 | CA   | ARG | 90 | -7.732  | 13.720 | 6.916  | 1.00 | 0.00 | C |
| ATOM | 1357 | C    | ARG | 90 | -9.118  | 13.854 | 6.292  | 1.00 | 0.00 | C |
| ATOM | 1358 | O    | ARG | 90 | -10.132 | 13.647 | 6.957  | 1.00 | 0.00 | O |
| ATOM | 1359 | CB   | ARG | 90 | -7.085  | 15.099 | 7.049  | 1.00 | 0.00 | C |
| ATOM | 1360 | CG   | ARG | 90 | -5.864  | 15.117 | 7.952  | 1.00 | 0.00 | C |
| ATOM | 1361 | CD   | ARG | 90 | -4.958  | 16.298 | 7.642  | 1.00 | 0.00 | C |
| ATOM | 1362 | NE   | ARG | 90 | -4.040  | 16.586 | 8.742  | 1.00 | 0.00 | N |
| ATOM | 1363 | CZ   | ARG | 90 | -4.363  | 17.332 | 9.793  | 1.00 | 0.00 | C |
| ATOM | 1364 | NH1  | ARG | 90 | -5.575  | 17.861 | 9.885  | 1.00 | 0.00 | N |
| ATOM | 1365 | NH2  | ARG | 90 | -3.474  | 17.550 | 10.752 | 1.00 | 0.00 | N |
| ATOM | 1366 | H    | ARG | 90 | -6.035  | 13.178 | 5.772  | 1.00 | 0.00 | H |

|      |      |      |     |    |         |        |        |      |      |   |
|------|------|------|-----|----|---------|--------|--------|------|------|---|
| ATOM | 1367 | HA   | ARG | 90 | -7.834  | 13.284 | 7.899  | 1.00 | 0.00 | H |
| ATOM | 1368 | 2HB3 | ARG | 90 | -7.815  | 15.788 | 7.452  | 1.00 | 0.00 | H |
| ATOM | 1369 | 2HG3 | ARG | 90 | -5.310  | 14.200 | 7.810  | 1.00 | 0.00 | H |
| ATOM | 1370 | 2HD3 | ARG | 90 | -5.570  | 17.167 | 7.460  | 1.00 | 0.00 | H |
| ATOM | 1371 | HE   | ARG | 90 | -3.138  | 16.206 | 8.693  | 1.00 | 0.00 | H |
| ATOM | 1372 | 1HH1 | ARG | 90 | -6.249  | 17.696 | 9.165  | 1.00 | 0.00 | H |
| ATOM | 1373 | 2HH1 | ARG | 90 | -5.817  | 18.421 | 10.679 | 1.00 | 0.00 | H |
| ATOM | 1374 | 1HH2 | ARG | 90 | -2.558  | 17.152 | 10.685 | 1.00 | 0.00 | H |
| ATOM | 1375 | 2HH2 | ARG | 90 | -3.719  | 18.111 | 11.541 | 1.00 | 0.00 | H |
| ATOM | 1376 | HB2  | ARG | 90 | -6.745  | 15.438 | 6.070  | 1.00 | 0.00 | H |
| ATOM | 1377 | HG2  | ARG | 90 | -6.181  | 15.203 | 8.992  | 1.00 | 0.00 | H |
| ATOM | 1378 | HD2  | ARG | 90 | -4.354  | 16.071 | 6.763  | 1.00 | 0.00 | H |
| ATOM | 1379 | N    | VAL | 91 | -9.153  | 14.199 | 5.009  | 1.00 | 0.00 | N |
| ATOM | 1380 | CA   | VAL | 91 | -10.413 | 14.360 | 4.294  | 1.00 | 0.00 | C |
| ATOM | 1381 | C    | VAL | 91 | -11.371 | 13.217 | 4.609  | 1.00 | 0.00 | C |
| ATOM | 1382 | O    | VAL | 91 | -12.509 | 13.442 | 5.023  | 1.00 | 0.00 | O |
| ATOM | 1383 | CB   | VAL | 91 | -10.191 | 14.426 | 2.772  | 1.00 | 0.00 | C |
| ATOM | 1384 | CG1  | VAL | 91 | -11.520 | 14.536 | 2.042  | 1.00 | 0.00 | C |
| ATOM | 1385 | CG2  | VAL | 91 | -9.278  | 15.591 | 2.416  | 1.00 | 0.00 | C |
| ATOM | 1386 | H    | VAL | 91 | -8.309  | 14.351 | 4.532  | 1.00 | 0.00 | H |
| ATOM | 1387 | HA   | VAL | 91 | -10.861 | 15.291 | 4.610  | 1.00 | 0.00 | H |
| ATOM | 1388 | HB   | VAL | 91 | -9.709  | 13.511 | 2.459  | 1.00 | 0.00 | H |
| ATOM | 1389 | 1HG1 | VAL | 91 | -12.086 | 15.360 | 2.448  | 1.00 | 0.00 | H |
| ATOM | 1390 | 2HG1 | VAL | 91 | -11.340 | 14.704 | 0.989  | 1.00 | 0.00 | H |
| ATOM | 1391 | 3HG1 | VAL | 91 | -12.077 | 13.620 | 2.170  | 1.00 | 0.00 | H |
| ATOM | 1392 | 1HG2 | VAL | 91 | -9.757  | 16.206 | 1.667  | 1.00 | 0.00 | H |
| ATOM | 1393 | 2HG2 | VAL | 91 | -9.089  | 16.182 | 3.300  | 1.00 | 0.00 | H |
| ATOM | 1394 | 3HG2 | VAL | 91 | -8.345  | 15.214 | 2.028  | 1.00 | 0.00 | H |
| ATOM | 1395 | N    | PHE | 92 | -10.906 | 11.990 | 4.404  | 1.00 | 0.00 | N |
| ATOM | 1396 | CA   | PHE | 92 | -11.723 | 10.810 | 4.666  | 1.00 | 0.00 | C |
| ATOM | 1397 | C    | PHE | 92 | -12.181 | 10.776 | 6.121  | 1.00 | 0.00 | C |
| ATOM | 1398 | O    | PHE | 92 | -13.360 | 10.571 | 6.408  | 1.00 | 0.00 | O |
| ATOM | 1399 | CB   | PHE | 92 | -10.938 | 9.538  | 4.336  | 1.00 | 0.00 | C |
| ATOM | 1400 | CG   | PHE | 92 | -10.870 | 9.241  | 2.865  | 1.00 | 0.00 | C |
| ATOM | 1401 | CD1  | PHE | 92 | -9.886  | 9.814  | 2.075  | 1.00 | 0.00 | C |
| ATOM | 1402 | CE1  | PHE | 92 | -9.820  | 9.543  | 0.722  | 1.00 | 0.00 | C |
| ATOM | 1403 | CZ   | PHE | 92 | -10.740 | 8.691  | 0.143  | 1.00 | 0.00 | C |
| ATOM | 1404 | CE2  | PHE | 92 | -11.725 | 8.113  | 0.919  | 1.00 | 0.00 | C |
| ATOM | 1405 | CD2  | PHE | 92 | -11.786 | 8.388  | 2.272  | 1.00 | 0.00 | C |
| ATOM | 1406 | H    | PHE | 92 | -9.992  | 11.874 | 4.072  | 1.00 | 0.00 | H |
| ATOM | 1407 | HA   | PHE | 92 | -12.592 | 10.861 | 4.028  | 1.00 | 0.00 | H |
| ATOM | 1408 | 2HB3 | PHE | 92 | -11.410 | 8.697  | 4.824  | 1.00 | 0.00 | H |
| ATOM | 1409 | 1HD  | PHE | 92 | -9.166  | 10.481 | 2.526  | 1.00 | 0.00 | H |
| ATOM | 1410 | 1HE  | PHE | 92 | -9.049  | 9.997  | 0.116  | 1.00 | 0.00 | H |
| ATOM | 1411 | HZ   | PHE | 92 | -10.691 | 8.476  | -0.914 | 1.00 | 0.00 | H |
| ATOM | 1412 | 2HE  | PHE | 92 | -12.447 | 7.445  | 0.470  | 1.00 | 0.00 | H |
| ATOM | 1413 | 2HD  | PHE | 92 | -12.557 | 7.934  | 2.880  | 1.00 | 0.00 | H |
| ATOM | 1414 | HB2  | PHE | 92 | -9.912  | 9.643  | 4.684  | 1.00 | 0.00 | H |
| ATOM | 1415 | N    | ASP | 93 | -11.238 | 10.977 | 7.036  | 1.00 | 0.00 | N |
| ATOM | 1416 | CA   | ASP | 93 | -11.543 | 10.969 | 8.462  | 1.00 | 0.00 | C |
| ATOM | 1417 | C    | ASP | 93 | -12.412 | 12.166 | 8.838  | 1.00 | 0.00 | C |
| ATOM | 1418 | O    | ASP | 93 | -11.909 | 13.269 | 9.052  | 1.00 | 0.00 | O |
| ATOM | 1419 | CB   | ASP | 93 | -10.251 | 10.985 | 9.281  | 1.00 | 0.00 | C |
| ATOM | 1420 | CG   | ASP | 93 | -10.456 | 10.466 | 10.691 | 1.00 | 0.00 | C |
| ATOM | 1421 | OD1  | ASP | 93 | -11.329 | 9.597  | 10.883 | 1.00 | 0.00 | O |
| ATOM | 1422 | OD2  | ASP | 93 | -9.740  | 10.931 | 11.604 | 1.00 | 0.00 | O |
| ATOM | 1423 | H    | ASP | 93 | -10.316 | 11.135 | 6.745  | 1.00 | 0.00 | H |
| ATOM | 1424 | HA   | ASP | 93 | -12.087 | 10.063 | 8.681  | 1.00 | 0.00 | H |
| ATOM | 1425 | 2HB3 | ASP | 93 | -9.881  | 11.998 | 9.339  | 1.00 | 0.00 | H |
| ATOM | 1426 | HB2  | ASP | 93 | -9.511  | 10.343 | 8.804  | 1.00 | 0.00 | H |
| ATOM | 1427 | N    | LYS | 94 | -13.719 | 11.941 | 8.914  | 1.00 | 0.00 | N |
| ATOM | 1428 | CA   | LYS | 94 | -14.659 | 13.000 | 9.263  | 1.00 | 0.00 | C |
| ATOM | 1429 | C    | LYS | 94 | -14.490 | 13.418 | 10.720 | 1.00 | 0.00 | C |
| ATOM | 1430 | O    | LYS | 94 | -14.131 | 14.561 | 11.009 | 1.00 | 0.00 | O |
| ATOM | 1431 | CB   | LYS | 94 | -16.097 | 12.532 | 9.019  | 1.00 | 0.00 | C |
| ATOM | 1432 | CG   | LYS | 94 | -16.582 | 12.770 | 7.598  | 1.00 | 0.00 | C |
| ATOM | 1433 | CD   | LYS | 94 | -18.083 | 12.982 | 7.552  | 1.00 | 0.00 | C |
| ATOM | 1434 | CE   | LYS | 94 | -18.827 | 11.668 | 7.358  | 1.00 | 0.00 | C |
| ATOM | 1435 | NZ   | LYS | 94 | -20.219 | 11.885 | 6.877  | 1.00 | 0.00 | N |
| ATOM | 1436 | H    | LYS | 94 | -14.060 | 11.040 | 8.730  | 1.00 | 0.00 | H |
| ATOM | 1437 | HA   | LYS | 94 | -14.455 | 13.849 | 8.630  | 1.00 | 0.00 | H |
| ATOM | 1438 | 2HB3 | LYS | 94 | -16.753 | 13.064 | 9.695  | 1.00 | 0.00 | H |
| ATOM | 1439 | 2HG3 | LYS | 94 | -16.328 | 11.909 | 6.996  | 1.00 | 0.00 | H |
| ATOM | 1440 | 2HD3 | LYS | 94 | -18.319 | 13.643 | 6.727  | 1.00 | 0.00 | H |
| ATOM | 1441 | 2HE3 | LYS | 94 | -18.857 | 11.145 | 8.303  | 1.00 | 0.00 | H |
| ATOM | 1442 | 1HZ  | LYS | 94 | -20.289 | 11.653 | 5.866  | 1.00 | 0.00 | H |
| ATOM | 1443 | 2HZ  | LYS | 94 | -20.494 | 12.879 | 7.013  | 1.00 | 0.00 | H |

|      |      |      |     |     |         |        |        |      |      |   |
|------|------|------|-----|-----|---------|--------|--------|------|------|---|
| ATOM | 1444 | 3HZ  | LYS | 94  | -20.880 | 11.279 | 7.407  | 1.00 | 0.00 | H |
| ATOM | 1445 | HB2  | LYS | 94  | -16.166 | 11.459 | 9.192  | 1.00 | 0.00 | H |
| ATOM | 1446 | HG2  | LYS | 94  | -16.102 | 13.663 | 7.195  | 1.00 | 0.00 | H |
| ATOM | 1447 | HD2  | LYS | 94  | -18.418 | 13.427 | 8.489  | 1.00 | 0.00 | H |
| ATOM | 1448 | HE2  | LYS | 94  | -18.311 | 11.066 | 6.610  | 1.00 | 0.00 | H |
| ATOM | 1449 | N    | ASP | 95  | -14.748 | 12.487 | 11.633 | 1.00 | 0.00 | N |
| ATOM | 1450 | CA   | ASP | 95  | -14.620 | 12.760 | 13.059 | 1.00 | 0.00 | C |
| ATOM | 1451 | C    | ASP | 95  | -13.252 | 13.357 | 13.379 | 1.00 | 0.00 | C |
| ATOM | 1452 | O    | ASP | 95  | -13.144 | 14.312 | 14.146 | 1.00 | 0.00 | O |
| ATOM | 1453 | CB   | ASP | 95  | -14.835 | 11.480 | 13.866 | 1.00 | 0.00 | C |
| ATOM | 1454 | CG   | ASP | 95  | -13.764 | 10.442 | 13.601 | 1.00 | 0.00 | C |
| ATOM | 1455 | OD1  | ASP | 95  | -13.230 | 10.416 | 12.471 | 1.00 | 0.00 | O |
| ATOM | 1456 | OD2  | ASP | 95  | -13.457 | 9.655  | 14.521 | 1.00 | 0.00 | O |
| ATOM | 1457 | H    | ASP | 95  | -15.030 | 11.597 | 11.339 | 1.00 | 0.00 | H |
| ATOM | 1458 | HA   | ASP | 95  | -15.383 | 13.477 | 13.329 | 1.00 | 0.00 | H |
| ATOM | 1459 | 2HB3 | ASP | 95  | -15.793 | 11.056 | 13.606 | 1.00 | 0.00 | H |
| ATOM | 1460 | HB2  | ASP | 95  | -14.804 | 11.710 | 14.931 | 1.00 | 0.00 | H |
| ATOM | 1461 | N    | GLY | 96  | -12.210 | 12.780 | 12.787 | 1.00 | 0.00 | N |
| ATOM | 1462 | CA   | GLY | 96  | -10.863 | 13.267 | 13.023 | 1.00 | 0.00 | C |
| ATOM | 1463 | C    | GLY | 96  | -10.234 | 12.657 | 14.259 | 1.00 | 0.00 | C |
| ATOM | 1464 | O    | GLY | 96  | -9.627  | 13.360 | 15.066 | 1.00 | 0.00 | O |
| ATOM | 1465 | H    | GLY | 96  | -12.357 | 12.022 | 12.186 | 1.00 | 0.00 | H |
| ATOM | 1466 | 2HA  | GLY | 96  | -10.251 | 13.028 | 12.165 | 1.00 | 0.00 | H |
| ATOM | 1467 | 3HA  | GLY | 96  | -10.896 | 14.339 | 13.142 | 1.00 | 0.00 | H |
| ATOM | 1468 | N    | ASN | 97  | -10.383 | 11.346 | 14.411 | 1.00 | 0.00 | N |
| ATOM | 1469 | CA   | ASN | 97  | -9.827  | 10.640 | 15.560 | 1.00 | 0.00 | C |
| ATOM | 1470 | C    | ASN | 97  | -8.566  | 9.873  | 15.170 | 1.00 | 0.00 | C |
| ATOM | 1471 | O    | ASN | 97  | -7.564  | 9.903  | 15.883 | 1.00 | 0.00 | O |
| ATOM | 1472 | CB   | ASN | 97  | -10.863 | 9.679  | 16.145 | 1.00 | 0.00 | C |
| ATOM | 1473 | CG   | ASN | 97  | -10.981 | 8.397  | 15.344 | 1.00 | 0.00 | C |
| ATOM | 1474 | OD1  | ASN | 97  | -11.354 | 8.418  | 14.172 | 1.00 | 0.00 | O |
| ATOM | 1475 | ND2  | ASN | 97  | -10.659 | 7.273  | 15.975 | 1.00 | 0.00 | N |
| ATOM | 1476 | H    | ASN | 97  | -10.879 | 10.839 | 13.735 | 1.00 | 0.00 | H |
| ATOM | 1477 | HA   | ASN | 97  | -9.569  | 11.377 | 16.307 | 1.00 | 0.00 | H |
| ATOM | 1478 | 2HB3 | ASN | 97  | -11.828 | 10.164 | 16.160 | 1.00 | 0.00 | H |
| ATOM | 1479 | 1HD2 | ASN | 97  | -10.368 | 7.333  | 16.909 | 1.00 | 0.00 | H |
| ATOM | 1480 | 2HD2 | ASN | 97  | -10.725 | 6.429  | 15.481 | 1.00 | 0.00 | H |
| ATOM | 1481 | HB2  | ASN | 97  | -10.571 | 9.401  | 17.158 | 1.00 | 0.00 | H |
| ATOM | 1482 | N    | GLY | 98  | -8.626  | 9.187  | 14.033 | 1.00 | 0.00 | N |
| ATOM | 1483 | CA   | GLY | 98  | -7.484  | 8.420  | 13.569 | 1.00 | 0.00 | C |
| ATOM | 1484 | C    | GLY | 98  | -7.884  | 7.282  | 12.652 | 1.00 | 0.00 | C |
| ATOM | 1485 | O    | GLY | 98  | -7.218  | 7.019  | 11.651 | 1.00 | 0.00 | O |
| ATOM | 1486 | H    | GLY | 98  | -9.454  | 9.199  | 13.508 | 1.00 | 0.00 | H |
| ATOM | 1487 | 2HA  | GLY | 98  | -6.816  | 9.080  | 13.036 | 1.00 | 0.00 | H |
| ATOM | 1488 | 3HA  | GLY | 98  | -6.967  | 8.014  | 14.425 | 1.00 | 0.00 | H |
| ATOM | 1489 | N    | TYR | 99  | -8.974  | 6.604  | 12.993 | 1.00 | 0.00 | N |
| ATOM | 1490 | CA   | TYR | 99  | -9.461  | 5.485  | 12.195 | 1.00 | 0.00 | C |
| ATOM | 1491 | C    | TYR | 99  | -10.619 | 5.916  | 11.300 | 1.00 | 0.00 | C |
| ATOM | 1492 | O    | TYR | 99  | -11.532 | 6.614  | 11.741 | 1.00 | 0.00 | O |
| ATOM | 1493 | CB   | TYR | 99  | -9.904  | 4.338  | 13.104 | 1.00 | 0.00 | C |
| ATOM | 1494 | CG   | TYR | 99  | -8.752  | 3.571  | 13.716 | 1.00 | 0.00 | C |
| ATOM | 1495 | CD1  | TYR | 99  | -7.812  | 4.211  | 14.513 | 1.00 | 0.00 | C |
| ATOM | 1496 | CE1  | TYR | 99  | -6.758  | 3.515  | 15.071 | 1.00 | 0.00 | C |
| ATOM | 1497 | CZ   | TYR | 99  | -6.637  | 2.161  | 14.842 | 1.00 | 0.00 | C |
| ATOM | 1498 | CE2  | TYR | 99  | -7.560  | 1.502  | 14.056 | 1.00 | 0.00 | C |
| ATOM | 1499 | CD2  | TYR | 99  | -8.609  | 2.207  | 13.499 | 1.00 | 0.00 | C |
| ATOM | 1500 | OH   | TYR | 99  | -5.590  | 1.462  | 15.400 | 1.00 | 0.00 | O |
| ATOM | 1501 | H    | TYR | 99  | -9.465  | 6.862  | 13.801 | 1.00 | 0.00 | H |
| ATOM | 1502 | HA   | TYR | 99  | -8.648  | 5.144  | 11.572 | 1.00 | 0.00 | H |
| ATOM | 1503 | 2HB3 | TYR | 99  | -10.498 | 3.642  | 12.531 | 1.00 | 0.00 | H |
| ATOM | 1504 | 1HD  | TYR | 99  | -7.911  | 5.272  | 14.690 | 1.00 | 0.00 | H |
| ATOM | 1505 | 1HE  | TYR | 99  | -6.035  | 4.030  | 15.687 | 1.00 | 0.00 | H |
| ATOM | 1506 | 2HE  | TYR | 99  | -7.464  | 0.441  | 13.877 | 1.00 | 0.00 | H |
| ATOM | 1507 | 2HD  | TYR | 99  | -9.333  | 1.694  | 12.882 | 1.00 | 0.00 | H |
| ATOM | 1508 | HH   | TYR | 99  | -4.780  | 1.971  | 15.306 | 1.00 | 0.00 | H |
| ATOM | 1509 | HB2  | TYR | 99  | -10.491 | 4.734  | 13.932 | 1.00 | 0.00 | H |
| ATOM | 1510 | N    | ILE | 100 | -10.572 | 5.494  | 10.039 | 1.00 | 0.00 | N |
| ATOM | 1511 | CA   | ILE | 100 | -11.617 | 5.834  | 9.082  | 1.00 | 0.00 | C |
| ATOM | 1512 | C    | ILE | 100 | -12.622 | 4.697  | 8.938  | 1.00 | 0.00 | C |
| ATOM | 1513 | O    | ILE | 100 | -12.378 | 3.726  | 8.218  | 1.00 | 0.00 | O |
| ATOM | 1514 | CB   | ILE | 100 | -11.028 | 6.165  | 7.698  | 1.00 | 0.00 | C |
| ATOM | 1515 | CG2  | ILE | 100 | -12.141 | 6.477  | 6.709  | 1.00 | 0.00 | C |
| ATOM | 1516 | CG1  | ILE | 100 | -10.053 | 7.337  | 7.801  | 1.00 | 0.00 | C |
| ATOM | 1517 | CD1  | ILE | 100 | -9.156  | 7.488  | 6.590  | 1.00 | 0.00 | C |
| ATOM | 1518 | H    | ILE | 100 | -9.819  | 4.942  | 9.749  | 1.00 | 0.00 | H |
| ATOM | 1519 | HA   | ILE | 100 | -12.133 | 6.712  | 9.449  | 1.00 | 0.00 | H |
| ATOM | 1520 | HB   | ILE | 100 | -10.497 | 5.294  | 7.343  | 1.00 | 0.00 | H |



|      |      |      |      |     |         |       |        |      |      |   |
|------|------|------|------|-----|---------|-------|--------|------|------|---|
| ATOM | 1521 | 1HG2 | I LE | 100 | -11.718 | 6.935 | 5.825  | 1.00 | 0.00 | H |
| ATOM | 1522 | 2HG2 | I LE | 100 | -12.646 | 5.564 | 6.434  | 1.00 | 0.00 | H |
| ATOM | 1523 | 3HG2 | I LE | 100 | -12.846 | 7.156 | 7.164  | 1.00 | 0.00 | H |
| ATOM | 1524 | 2HG3 | I LE | 100 | -9.421  | 7.197 | 8.666  | 1.00 | 0.00 | H |
| ATOM | 1525 | 1HD1 | I LE | 100 | -9.003  | 8.538 | 6.385  | 1.00 | 0.00 | H |
| ATOM | 1526 | 2HD1 | I LE | 100 | -8.206  | 7.014 | 6.785  | 1.00 | 0.00 | H |
| ATOM | 1527 | 3HD1 | I LE | 100 | -9.625  | 7.019 | 5.738  | 1.00 | 0.00 | H |
| ATOM | 1528 | HG2  | I LE | 100 | -10.612 | 8.267 | 7.897  | 1.00 | 0.00 | H |
| ATOM | 1529 | N    | SER  | 101 | -13.753 | 4.821 | 9.624  | 1.00 | 0.00 | N |
| ATOM | 1530 | CA   | SER  | 101 | -14.795 | 3.803 | 9.574  | 1.00 | 0.00 | C |
| ATOM | 1531 | C    | SER  | 101 | -15.385 | 3.697 | 8.170  | 1.00 | 0.00 | C |
| ATOM | 1532 | O    | SER  | 101 | -15.146 | 4.555 | 7.319  | 1.00 | 0.00 | O |
| ATOM | 1533 | CB   | SER  | 101 | -15.900 | 4.123 | 10.581 | 1.00 | 0.00 | C |
| ATOM | 1534 | OG   | SER  | 101 | -16.464 | 5.399 | 10.331 | 1.00 | 0.00 | O |
| ATOM | 1535 | H    | SER  | 101 | -13.890 | 5.618 | 10.179 | 1.00 | 0.00 | H |
| ATOM | 1536 | HA   | SER  | 101 | -14.346 | 2.856 | 9.833  | 1.00 | 0.00 | H |
| ATOM | 1537 | 2HB3 | SER  | 101 | -15.488 | 4.114 | 11.580 | 1.00 | 0.00 | H |
| ATOM | 1538 | HG   | SER  | 101 | -15.810 | 6.078 | 10.507 | 1.00 | 0.00 | H |
| ATOM | 1539 | HB2  | SER  | 101 | -16.689 | 3.375 | 10.505 | 1.00 | 0.00 | H |
| ATOM | 1540 | N    | ALA  | 102 | -16.155 | 2.639 | 7.937  | 1.00 | 0.00 | N |
| ATOM | 1541 | CA   | ALA  | 102 | -16.780 | 2.422 | 6.638  | 1.00 | 0.00 | C |
| ATOM | 1542 | C    | ALA  | 102 | -17.735 | 3.559 | 6.293  | 1.00 | 0.00 | C |
| ATOM | 1543 | O    | ALA  | 102 | -17.755 | 4.044 | 5.162  | 1.00 | 0.00 | O |
| ATOM | 1544 | CB   | ALA  | 102 | -17.516 | 1.090 | 6.622  | 1.00 | 0.00 | C |
| ATOM | 1545 | H    | ALA  | 102 | -16.307 | 1.991 | 8.655  | 1.00 | 0.00 | H |
| ATOM | 1546 | HA   | ALA  | 102 | -15.998 | 2.384 | 5.894  | 1.00 | 0.00 | H |
| ATOM | 1547 | 1HB  | ALA  | 102 | -16.833 | 0.307 | 6.321  | 1.00 | 0.00 | H |
| ATOM | 1548 | 2HB  | ALA  | 102 | -17.894 | 0.877 | 7.612  | 1.00 | 0.00 | H |
| ATOM | 1549 | 3HB  | ALA  | 102 | -18.336 | 1.141 | 5.925  | 1.00 | 0.00 | H |
| ATOM | 1550 | N    | ALA  | 103 | -18.528 | 3.981 | 7.272  | 1.00 | 0.00 | N |
| ATOM | 1551 | CA   | ALA  | 103 | -19.485 | 5.062 | 7.072  | 1.00 | 0.00 | C |
| ATOM | 1552 | C    | ALA  | 103 | -18.773 | 6.372 | 6.750  | 1.00 | 0.00 | C |
| ATOM | 1553 | O    | ALA  | 103 | -19.124 | 7.059 | 5.792  | 1.00 | 0.00 | O |
| ATOM | 1554 | CB   | ALA  | 103 | -20.364 | 5.224 | 8.304  | 1.00 | 0.00 | C |
| ATOM | 1555 | H    | ALA  | 103 | -18.465 | 3.554 | 8.154  | 1.00 | 0.00 | H |
| ATOM | 1556 | HA   | ALA  | 103 | -20.119 | 4.794 | 6.240  | 1.00 | 0.00 | H |
| ATOM | 1557 | 1HB  | ALA  | 103 | -21.012 | 6.078 | 8.170  | 1.00 | 0.00 | H |
| ATOM | 1558 | 2HB  | ALA  | 103 | -20.959 | 4.335 | 8.440  | 1.00 | 0.00 | H |
| ATOM | 1559 | 3HB  | ALA  | 103 | -19.740 | 5.378 | 9.171  | 1.00 | 0.00 | H |
| ATOM | 1560 | N    | GLU  | 104 | -17.771 | 6.711 | 7.558  | 1.00 | 0.00 | N |
| ATOM | 1561 | CA   | GLU  | 104 | -17.014 | 7.939 | 7.358  | 1.00 | 0.00 | C |
| ATOM | 1562 | C    | GLU  | 104 | -16.501 | 8.036 | 5.925  | 1.00 | 0.00 | C |
| ATOM | 1563 | O    | GLU  | 104 | -16.770 | 9.011 | 5.220  | 1.00 | 0.00 | O |
| ATOM | 1564 | CB   | GLU  | 104 | -15.838 | 8.004 | 8.336  | 1.00 | 0.00 | C |
| ATOM | 1565 | CG   | GLU  | 104 | -16.223 | 8.510 | 9.716  | 1.00 | 0.00 | C |
| ATOM | 1566 | CD   | GLU  | 104 | -15.020 | 8.732 | 10.612 | 1.00 | 0.00 | C |
| ATOM | 1567 | OE1  | GLU  | 104 | -14.063 | 9.400 | 10.164 | 1.00 | 0.00 | O |
| ATOM | 1568 | OE2  | GLU  | 104 | -15.034 | 8.240 | 11.758 | 1.00 | 0.00 | O |
| ATOM | 1569 | H    | GLU  | 104 | -17.540 | 6.121 | 8.303  | 1.00 | 0.00 | H |
| ATOM | 1570 | HA   | GLU  | 104 | -17.673 | 8.772 | 7.548  | 1.00 | 0.00 | H |
| ATOM | 1571 | 2HB3 | GLU  | 104 | -15.084 | 8.663 | 7.931  | 1.00 | 0.00 | H |
| ATOM | 1572 | 2HG3 | GLU  | 104 | -16.872 | 7.784 | 10.184 | 1.00 | 0.00 | H |
| ATOM | 1573 | HB2  | GLU  | 104 | -15.428 | 7.005 | 8.477  | 1.00 | 0.00 | H |
| ATOM | 1574 | HG2  | GLU  | 104 | -16.733 | 9.469 | 9.622  | 1.00 | 0.00 | H |
| ATOM | 1575 | N    | LEU  | 105 | -15.761 | 7.019 | 5.496  | 1.00 | 0.00 | N |
| ATOM | 1576 | CA   | LEU  | 105 | -15.210 | 6.987 | 4.147  | 1.00 | 0.00 | C |
| ATOM | 1577 | C    | LEU  | 105 | -16.321 | 6.888 | 3.106  | 1.00 | 0.00 | C |
| ATOM | 1578 | O    | LEU  | 105 | -16.315 | 7.605 | 2.106  | 1.00 | 0.00 | O |
| ATOM | 1579 | CB   | LEU  | 105 | -14.247 | 5.809 | 3.994  | 1.00 | 0.00 | C |
| ATOM | 1580 | CG   | LEU  | 105 | -13.834 | 5.461 | 2.564  | 1.00 | 0.00 | C |
| ATOM | 1581 | CD1  | LEU  | 105 | -12.440 | 4.851 | 2.546  | 1.00 | 0.00 | C |
| ATOM | 1582 | CD2  | LEU  | 105 | -14.841 | 4.510 | 1.934  | 1.00 | 0.00 | C |
| ATOM | 1583 | H    | LEU  | 105 | -15.580 | 6.270 | 6.103  | 1.00 | 0.00 | H |
| ATOM | 1584 | HA   | LEU  | 105 | -14.668 | 7.908 | 3.988  | 1.00 | 0.00 | H |
| ATOM | 1585 | 2HB3 | LEU  | 105 | -14.721 | 4.937 | 4.424  | 1.00 | 0.00 | H |
| ATOM | 1586 | HG   | LEU  | 105 | -13.808 | 6.366 | 1.973  | 1.00 | 0.00 | H |
| ATOM | 1587 | 1HD1 | LEU  | 105 | -11.763 | 5.515 | 2.028  | 1.00 | 0.00 | H |
| ATOM | 1588 | 2HD1 | LEU  | 105 | -12.471 | 3.899 | 2.035  | 1.00 | 0.00 | H |
| ATOM | 1589 | 3HD1 | LEU  | 105 | -12.096 | 4.706 | 3.559  | 1.00 | 0.00 | H |
| ATOM | 1590 | 1HD2 | LEU  | 105 | -14.368 | 3.968 | 1.129  | 1.00 | 0.00 | H |
| ATOM | 1591 | 2HD2 | LEU  | 105 | -15.674 | 5.078 | 1.544  | 1.00 | 0.00 | H |
| ATOM | 1592 | 3HD2 | LEU  | 105 | -15.196 | 3.816 | 2.680  | 1.00 | 0.00 | H |
| ATOM | 1593 | HB2  | LEU  | 105 | -13.309 | 6.039 | 4.499  | 1.00 | 0.00 | H |
| ATOM | 1594 | N    | ARG  | 106 | -17.277 | 5.997 | 3.351  | 1.00 | 0.00 | N |
| ATOM | 1595 | CA   | ARG  | 106 | -18.395 | 5.804 | 2.438  | 1.00 | 0.00 | C |
| ATOM | 1596 | C    | ARG  | 106 | -18.931 | 7.146 | 1.944  | 1.00 | 0.00 | C |
| ATOM | 1597 | O    | ARG  | 106 | -19.072 | 7.364 | 0.740  | 1.00 | 0.00 | O |

|      |      |      |     |     |         |        |        |      |      |   |
|------|------|------|-----|-----|---------|--------|--------|------|------|---|
| ATOM | 1598 | CB   | ARG | 106 | -19.513 | 5.018  | 3.125  | 1.00 | 0.00 | C |
| ATOM | 1599 | CG   | ARG | 106 | -20.723 | 4.775  | 2.235  | 1.00 | 0.00 | C |
| ATOM | 1600 | CD   | ARG | 106 | -21.956 | 4.429  | 3.054  | 1.00 | 0.00 | C |
| ATOM | 1601 | NE   | ARG | 106 | -23.171 | 4.447  | 2.246  | 1.00 | 0.00 | N |
| ATOM | 1602 | CZ   | ARG | 106 | -24.275 | 3.779  | 2.563  | 1.00 | 0.00 | C |
| ATOM | 1603 | NH1  | ARG | 106 | -24.315 | 3.044  | 3.665  | 1.00 | 0.00 | N |
| ATOM | 1604 | NH2  | ARG | 106 | -25.342 | 3.849  | 1.778  | 1.00 | 0.00 | N |
| ATOM | 1605 | H    | ARG | 106 | -17.227 | 5.455  | 4.168  | 1.00 | 0.00 | H |
| ATOM | 1606 | HA   | ARG | 106 | -18.037 | 5.240  | 1.589  | 1.00 | 0.00 | H |
| ATOM | 1607 | 2HB3 | ARG | 106 | -19.838 | 5.566  | 3.996  | 1.00 | 0.00 | H |
| ATOM | 1608 | 2HG3 | ARG | 106 | -20.504 | 3.957  | 1.564  | 1.00 | 0.00 | H |
| ATOM | 1609 | 2HD3 | ARG | 106 | -22.053 | 5.146  | 3.854  | 1.00 | 0.00 | H |
| ATOM | 1610 | HE   | ARG | 106 | -23.165 | 4.986  | 1.428  | 1.00 | 0.00 | H |
| ATOM | 1611 | 1HH1 | ARG | 106 | -23.512 | 2.992  | 4.259  | 1.00 | 0.00 | H |
| ATOM | 1612 | 2HH1 | ARG | 106 | -25.147 | 2.543  | 3.903  | 1.00 | 0.00 | H |
| ATOM | 1613 | 1HH2 | ARG | 106 | -25.316 | 4.403  | 0.946  | 1.00 | 0.00 | H |
| ATOM | 1614 | 2HH2 | ARG | 106 | -26.171 | 3.346  | 2.018  | 1.00 | 0.00 | H |
| ATOM | 1615 | HB2  | ARG | 106 | -19.142 | 4.034  | 3.412  | 1.00 | 0.00 | H |
| ATOM | 1616 | HG2  | ARG | 106 | -20.942 | 5.677  | 1.665  | 1.00 | 0.00 | H |
| ATOM | 1617 | HD2  | ARG | 106 | -21.851 | 3.423  | 3.460  | 1.00 | 0.00 | H |
| ATOM | 1618 | N    | HIS | 107 | -19.228 | 8.039  | 2.881  | 1.00 | 0.00 | N |
| ATOM | 1619 | CA   | HIS | 107 | -19.748 | 9.359  | 2.542  | 1.00 | 0.00 | C |
| ATOM | 1620 | C    | HIS | 107 | -18.791 | 10.097 | 1.612  | 1.00 | 0.00 | C |
| ATOM | 1621 | O    | HIS | 107 | -19.196 | 10.610 | 0.568  | 1.00 | 0.00 | O |
| ATOM | 1622 | CB   | HIS | 107 | -19.980 | 10.180 | 3.810  | 1.00 | 0.00 | C |
| ATOM | 1623 | CG   | HIS | 107 | -19.949 | 11.660 | 3.580  | 1.00 | 0.00 | C |
| ATOM | 1624 | ND1  | HIS | 107 | -20.757 | 12.296 | 2.661  | 1.00 | 0.00 | N |
| ATOM | 1625 | CD2  | HIS | 107 | -19.203 | 12.632 | 4.158  | 1.00 | 0.00 | C |
| ATOM | 1626 | CE1  | HIS | 107 | -20.508 | 13.593 | 2.681  | 1.00 | 0.00 | C |
| ATOM | 1627 | NE2  | HIS | 107 | -19.569 | 13.822 | 3.581  | 1.00 | 0.00 | N |
| ATOM | 1628 | H    | HIS | 107 | -19.093 | 7.807  | 3.824  | 1.00 | 0.00 | H |
| ATOM | 1629 | HA   | HIS | 107 | -20.690 | 9.223  | 2.034  | 1.00 | 0.00 | H |
| ATOM | 1630 | 2HB3 | HIS | 107 | -19.212 | 9.941  | 4.533  | 1.00 | 0.00 | H |
| ATOM | 1631 | 1HD  | HIS | 107 | -21.414 | 11.861 | 2.080  | 1.00 | 0.00 | H |
| ATOM | 1632 | 2HD  | HIS | 107 | -18.458 | 12.494 | 4.927  | 1.00 | 0.00 | H |
| ATOM | 1633 | 1HE  | HIS | 107 | -20.989 | 14.339 | 2.067  | 1.00 | 0.00 | H |
| ATOM | 1634 | 2HE  | HIS | 107 | -19.136 | 14.688 | 3.738  | 1.00 | 0.00 | H |
| ATOM | 1635 | HB2  | HIS | 107 | -20.963 | 9.949  | 4.219  | 1.00 | 0.00 | H |
| ATOM | 1636 | N    | VAL | 108 | -17.520 | 10.149 | 1.998  | 1.00 | 0.00 | N |
| ATOM | 1637 | CA   | VAL | 108 | -16.505 | 10.825 | 1.197  | 1.00 | 0.00 | C |
| ATOM | 1638 | C    | VAL | 108 | -16.557 | 10.368 | -0.257 | 1.00 | 0.00 | C |
| ATOM | 1639 | O    | VAL | 108 | -16.688 | 11.183 | -1.170 | 1.00 | 0.00 | O |
| ATOM | 1640 | CB   | VAL | 108 | -15.091 | 10.569 | 1.752  | 1.00 | 0.00 | C |
| ATOM | 1641 | CG1  | VAL | 108 | -14.043 | 11.233 | 0.872  | 1.00 | 0.00 | C |
| ATOM | 1642 | CG2  | VAL | 108 | -14.986 | 11.067 | 3.187  | 1.00 | 0.00 | C |
| ATOM | 1643 | H    | VAL | 108 | -17.258 | 9.722  | 2.839  | 1.00 | 0.00 | H |
| ATOM | 1644 | HA   | VAL | 108 | -16.700 | 11.887 | 1.240  | 1.00 | 0.00 | H |
| ATOM | 1645 | HB   | VAL | 108 | -14.911 | 9.506  | 1.750  | 1.00 | 0.00 | H |
| ATOM | 1646 | 1HG1 | VAL | 108 | -13.060 | 11.033 | 1.271  | 1.00 | 0.00 | H |
| ATOM | 1647 | 2HG1 | VAL | 108 | -14.114 | 10.837 | -0.131 | 1.00 | 0.00 | H |
| ATOM | 1648 | 3HG1 | VAL | 108 | -14.212 | 12.299 | 0.852  | 1.00 | 0.00 | H |
| ATOM | 1649 | 1HG2 | VAL | 108 | -14.568 | 10.289 | 3.808  | 1.00 | 0.00 | H |
| ATOM | 1650 | 2HG2 | VAL | 108 | -14.344 | 11.937 | 3.221  | 1.00 | 0.00 | H |
| ATOM | 1651 | 3HG2 | VAL | 108 | -15.967 | 11.331 | 3.550  | 1.00 | 0.00 | H |
| ATOM | 1652 | N    | MET | 109 | -16.454 | 9.060  | -0.465 | 1.00 | 0.00 | N |
| ATOM | 1653 | CA   | MET | 109 | -16.491 | 8.494  | -1.808 | 1.00 | 0.00 | C |
| ATOM | 1654 | C    | MET | 109 | -17.642 | 9.088  | -2.614 | 1.00 | 0.00 | C |
| ATOM | 1655 | O    | MET | 109 | -17.469 | 9.463  | -3.774 | 1.00 | 0.00 | O |
| ATOM | 1656 | CB   | MET | 109 | -16.632 | 6.973  | -1.739 | 1.00 | 0.00 | C |
| ATOM | 1657 | CG   | MET | 109 | -15.407 | 6.274  | -1.177 | 1.00 | 0.00 | C |
| ATOM | 1658 | SD   | MET | 109 | -14.208 | 5.836  | -2.453 | 1.00 | 0.00 | S |
| ATOM | 1659 | CE   | MET | 109 | -12.981 | 7.120  | -2.219 | 1.00 | 0.00 | C |
| ATOM | 1660 | H    | MET | 109 | -16.352 | 8.458  | 0.304  | 1.00 | 0.00 | H |
| ATOM | 1661 | HA   | MET | 109 | -15.561 | 8.738  | -2.296 | 1.00 | 0.00 | H |
| ATOM | 1662 | 2HB3 | MET | 109 | -16.810 | 6.595  | -2.735 | 1.00 | 0.00 | H |
| ATOM | 1663 | 2HG3 | MET | 109 | -15.722 | 5.370  | -0.675 | 1.00 | 0.00 | H |
| ATOM | 1664 | 1HE  | MET | 109 | -12.281 | 6.815  | -1.457 | 1.00 | 0.00 | H |
| ATOM | 1665 | 2HE  | MET | 109 | -12.455 | 7.288  | -3.147 | 1.00 | 0.00 | H |
| ATOM | 1666 | 3HE  | MET | 109 | -13.470 | 8.033  | -1.911 | 1.00 | 0.00 | H |
| ATOM | 1667 | HB2  | MET | 109 | -17.464 | 6.713  | -1.082 | 1.00 | 0.00 | H |
| ATOM | 1668 | HG2  | MET | 109 | -14.898 | 6.936  | -0.477 | 1.00 | 0.00 | H |
| ATOM | 1669 | N    | THR | 110 | -18.815 | 9.168  | -1.995 | 1.00 | 0.00 | N |
| ATOM | 1670 | CA   | THR | 110 | -19.993 | 9.714  | -2.657 | 1.00 | 0.00 | C |
| ATOM | 1671 | C    | THR | 110 | -19.689 | 11.062 | -3.297 | 1.00 | 0.00 | C |
| ATOM | 1672 | O    | THR | 110 | -19.880 | 11.249 | -4.499 | 1.00 | 0.00 | O |
| ATOM | 1673 | CB   | THR | 110 | -21.165 | 9.879  | -1.670 | 1.00 | 0.00 | C |
| ATOM | 1674 | OG1  | THR | 110 | -21.437 | 8.633  | -1.019 | 1.00 | 0.00 | O |

|      |      |      |     |     |         |        |         |      |      |   |
|------|------|------|-----|-----|---------|--------|---------|------|------|---|
| ATOM | 1675 | CG2  | THR | 110 | -22.415 | 10.365 | -2.390  | 1.00 | 0.00 | C |
| ATOM | 1676 | H    | THR | 110 | -18.888 | 8.851  | -1.070  | 1.00 | 0.00 | H |
| ATOM | 1677 | HA   | THR | 110 | -20.295 | 9.020  | -3.429  | 1.00 | 0.00 | H |
| ATOM | 1678 | HB   | THR | 110 | -20.889 | 10.613 | -0.927  | 1.00 | 0.00 | H |
| ATOM | 1679 | 1HG  | THR | 110 | -20.723 | 8.426  | -0.413  | 1.00 | 0.00 | H |
| ATOM | 1680 | 1HG2 | THR | 110 | -22.262 | 11.379 | -2.729  | 1.00 | 0.00 | H |
| ATOM | 1681 | 2HG2 | THR | 110 | -23.253 | 10.333 | -1.715  | 1.00 | 0.00 | H |
| ATOM | 1682 | 3HG2 | THR | 110 | -22.609 | 9.727  | -3.241  | 1.00 | 0.00 | H |
| ATOM | 1683 | N    | ASN | 111 | -19.213 | 12.003 | -2.487  | 1.00 | 0.00 | N |
| ATOM | 1684 | CA   | ASN | 111 | -18.881 | 13.337 | -2.976  | 1.00 | 0.00 | C |
| ATOM | 1685 | C    | ASN | 111 | -18.268 | 13.268 | -4.370  | 1.00 | 0.00 | C |
| ATOM | 1686 | O    | ASN | 111 | -18.684 | 13.988 | -5.280  | 1.00 | 0.00 | O |
| ATOM | 1687 | CB   | ASN | 111 | -17.912 | 14.028 | -2.014  | 1.00 | 0.00 | C |
| ATOM | 1688 | CG   | ASN | 111 | -18.604 | 14.546 | -0.769  | 1.00 | 0.00 | C |
| ATOM | 1689 | OD1  | ASN | 111 | -19.624 | 15.231 | -0.851  | 1.00 | 0.00 | O |
| ATOM | 1690 | ND2  | ASN | 111 | -18.051 | 14.220 | 0.393   | 1.00 | 0.00 | N |
| ATOM | 1691 | H    | ASN | 111 | -19.082 | 11.797 | -1.539  | 1.00 | 0.00 | H |
| ATOM | 1692 | HA   | ASN | 111 | -19.796 | 13.910 | -3.024  | 1.00 | 0.00 | H |
| ATOM | 1693 | 2HB3 | ASN | 111 | -17.446 | 14.862 | -2.518  | 1.00 | 0.00 | H |
| ATOM | 1694 | 1HD2 | ASN | 111 | -17.239 | 13.673 | 0.383   | 1.00 | 0.00 | H |
| ATOM | 1695 | 2HD2 | ASN | 111 | -18.477 | 14.543 | 1.215   | 1.00 | 0.00 | H |
| ATOM | 1696 | HB2  | ASN | 111 | -17.150 | 13.318 | -1.691  | 1.00 | 0.00 | H |
| ATOM | 1697 | N    | LEU | 112 | -17.278 | 12.397 | -4.534  | 1.00 | 0.00 | N |
| ATOM | 1698 | CA   | LEU | 112 | -16.607 | 12.233 | -5.820  | 1.00 | 0.00 | C |
| ATOM | 1699 | C    | LEU | 112 | -17.605 | 12.331 | -6.970  | 1.00 | 0.00 | C |
| ATOM | 1700 | O    | LEU | 112 | -17.349 | 12.999 | -7.972  | 1.00 | 0.00 | O |
| ATOM | 1701 | CB   | LEU | 112 | -15.883 | 10.888 | -5.871  | 1.00 | 0.00 | C |
| ATOM | 1702 | CG   | LEU | 112 | -14.748 | 10.697 | -4.864  | 1.00 | 0.00 | C |
| ATOM | 1703 | CD1  | LEU | 112 | -14.191 | 9.284  | -4.948  | 1.00 | 0.00 | C |
| ATOM | 1704 | CD2  | LEU | 112 | -13.647 | 11.720 | -5.104  | 1.00 | 0.00 | C |
| ATOM | 1705 | H    | LEU | 112 | -16.991 | 11.851 | -3.774  | 1.00 | 0.00 | H |
| ATOM | 1706 | HA   | LEU | 112 | -15.883 | 13.027 | -5.921  | 1.00 | 0.00 | H |
| ATOM | 1707 | 2HB3 | LEU | 112 | -15.471 | 10.772 | -6.864  | 1.00 | 0.00 | H |
| ATOM | 1708 | HG   | LEU | 112 | -15.132 | 10.846 | -3.865  | 1.00 | 0.00 | H |
| ATOM | 1709 | 1HD1 | LEU | 112 | -13.380 | 9.175  | -4.243  | 1.00 | 0.00 | H |
| ATOM | 1710 | 2HD1 | LEU | 112 | -13.827 | 9.100  | -5.948  | 1.00 | 0.00 | H |
| ATOM | 1711 | 3HD1 | LEU | 112 | -14.973 | 8.576  | -4.713  | 1.00 | 0.00 | H |
| ATOM | 1712 | 1HD2 | LEU | 112 | -12.685 | 11.238 | -5.028  | 1.00 | 0.00 | H |
| ATOM | 1713 | 2HD2 | LEU | 112 | -13.716 | 12.505 | -4.362  | 1.00 | 0.00 | H |
| ATOM | 1714 | 3HD2 | LEU | 112 | -13.760 | 12.148 | -6.090  | 1.00 | 0.00 | H |
| ATOM | 1715 | HB2  | LEU | 112 | -16.586 | 10.087 | -5.641  | 1.00 | 0.00 | H |
| ATOM | 1716 | N    | GLY | 113 | -18.743 | 11.661 | -6.820  | 1.00 | 0.00 | N |
| ATOM | 1717 | CA   | GLY | 113 | -19.764 | 11.687 | -7.852  | 1.00 | 0.00 | C |
| ATOM | 1718 | C    | GLY | 113 | -20.317 | 10.310 | -8.155  | 1.00 | 0.00 | C |
| ATOM | 1719 | O    | GLY | 113 | -20.529 | 9.961  | -9.315  | 1.00 | 0.00 | O |
| ATOM | 1720 | H    | GLY | 113 | -18.891 | 11.145 | -6.000  | 1.00 | 0.00 | H |
| ATOM | 1721 | 2HA  | GLY | 113 | -20.571 | 12.326 | -7.528  | 1.00 | 0.00 | H |
| ATOM | 1722 | 3HA  | GLY | 113 | -19.333 | 12.096 | -8.756  | 1.00 | 0.00 | H |
| ATOM | 1723 | N    | GLU | 114 | -20.551 | 9.524  | -7.109  | 1.00 | 0.00 | N |
| ATOM | 1724 | CA   | GLU | 114 | -21.080 | 8.176  | -7.268  | 1.00 | 0.00 | C |
| ATOM | 1725 | C    | GLU | 114 | -21.887 | 7.759  | -6.043  | 1.00 | 0.00 | C |
| ATOM | 1726 | O    | GLU | 114 | -21.802 | 8.384  | -4.986  | 1.00 | 0.00 | O |
| ATOM | 1727 | CB   | GLU | 114 | -19.945 | 7.181  | -7.506  | 1.00 | 0.00 | C |
| ATOM | 1728 | CG   | GLU | 114 | -19.185 | 7.420  | -8.802  | 1.00 | 0.00 | C |
| ATOM | 1729 | CD   | GLU | 114 | -20.000 | 7.059  | -10.030 | 1.00 | 0.00 | C |
| ATOM | 1730 | OE1  | GLU | 114 | -20.952 | 6.262  | -9.895  | 1.00 | 0.00 | O |
| ATOM | 1731 | OE2  | GLU | 114 | -19.686 | 7.573  | -11.123 | 1.00 | 0.00 | O |
| ATOM | 1732 | H    | GLU | 114 | -20.361 | 9.859  | -6.207  | 1.00 | 0.00 | H |
| ATOM | 1733 | HA   | GLU | 114 | -21.734 | 8.176  | -8.130  | 1.00 | 0.00 | H |
| ATOM | 1734 | 2HB3 | GLU | 114 | -20.354 | 6.183  | -7.534  | 1.00 | 0.00 | H |
| ATOM | 1735 | 2HG3 | GLU | 114 | -18.288 | 6.822  | -8.795  | 1.00 | 0.00 | H |
| ATOM | 1736 | HB2  | GLU | 114 | -19.210 | 7.267  | -6.705  | 1.00 | 0.00 | H |
| ATOM | 1737 | HG2  | GLU | 114 | -18.934 | 8.478  | -8.886  | 1.00 | 0.00 | H |
| ATOM | 1738 | N    | LYS | 115 | -22.674 | 6.698  | -6.191  | 1.00 | 0.00 | N |
| ATOM | 1739 | CA   | LYS | 115 | -23.496 | 6.194  | -5.098  | 1.00 | 0.00 | C |
| ATOM | 1740 | C    | LYS | 115 | -23.103 | 4.764  | -4.734  | 1.00 | 0.00 | C |
| ATOM | 1741 | O    | LYS | 115 | -23.483 | 3.813  | -5.416  | 1.00 | 0.00 | O |
| ATOM | 1742 | CB   | LYS | 115 | -24.976 | 6.244  | -5.481  | 1.00 | 0.00 | C |
| ATOM | 1743 | CG   | LYS | 115 | -25.536 | 7.654  | -5.559  | 1.00 | 0.00 | C |
| ATOM | 1744 | CD   | LYS | 115 | -26.741 | 7.725  | -6.482  | 1.00 | 0.00 | C |
| ATOM | 1745 | CE   | LYS | 115 | -27.443 | 9.071  | -6.379  | 1.00 | 0.00 | C |
| ATOM | 1746 | NZ   | LYS | 115 | -26.867 | 10.070 | -7.321  | 1.00 | 0.00 | N |
| ATOM | 1747 | H    | LYS | 115 | -22.700 | 6.240  | -7.059  | 1.00 | 0.00 | H |
| ATOM | 1748 | HA   | LYS | 115 | -23.333 | 6.828  | -4.241  | 1.00 | 0.00 | H |
| ATOM | 1749 | 2HB3 | LYS | 115 | -25.546 | 5.694  | -4.746  | 1.00 | 0.00 | H |
| ATOM | 1750 | 2HG3 | LYS | 115 | -24.768 | 8.317  | -5.933  | 1.00 | 0.00 | H |
| ATOM | 1751 | 2HD3 | LYS | 115 | -27.437 | 6.944  | -6.212  | 1.00 | 0.00 | H |

|      |      |      |     |     |         |        |        |      |      |   |
|------|------|------|-----|-----|---------|--------|--------|------|------|---|
| ATOM | 1752 | 2HE3 | LYS | 115 | -27.341 | 9.440  | -5.369 | 1.00 | 0.00 | H |
| ATOM | 1753 | 1HZ  | LYS | 115 | -27.418 | 10.090 | -8.204 | 1.00 | 0.00 | H |
| ATOM | 1754 | 2HZ  | LYS | 115 | -25.882 | 9.823  | -7.546 | 1.00 | 0.00 | H |
| ATOM | 1755 | 3HZ  | LYS | 115 | -26.887 | 11.018 | -6.892 | 1.00 | 0.00 | H |
| ATOM | 1756 | HB2  | LYS | 115 | -25.112 | 5.807  | -6.470 | 1.00 | 0.00 | H |
| ATOM | 1757 | HG2  | LYS | 115 | -25.856 | 7.975  | -4.568 | 1.00 | 0.00 | H |
| ATOM | 1758 | HD2  | LYS | 115 | -26.418 | 7.595  | -7.514 | 1.00 | 0.00 | H |
| ATOM | 1759 | HE2  | LYS | 115 | -28.496 | 8.952  | -6.632 | 1.00 | 0.00 | H |
| ATOM | 1760 | N    | LEU | 116 | -22.341 | 4.622  | -3.655 | 1.00 | 0.00 | N |
| ATOM | 1761 | CA   | LEU | 116 | -21.900 | 3.309  | -3.199 | 1.00 | 0.00 | C |
| ATOM | 1762 | C    | LEU | 116 | -22.713 | 2.848  | -1.996 | 1.00 | 0.00 | C |
| ATOM | 1763 | O    | LEU | 116 | -23.336 | 3.655  | -1.305 | 1.00 | 0.00 | O |
| ATOM | 1764 | CB   | LEU | 116 | -20.414 | 3.347  | -2.838 | 1.00 | 0.00 | C |
| ATOM | 1765 | CG   | LEU | 116 | -19.476 | 3.902  | -3.912 | 1.00 | 0.00 | C |
| ATOM | 1766 | CD1  | LEU | 116 | -18.158 | 4.345  | -3.294 | 1.00 | 0.00 | C |
| ATOM | 1767 | CD2  | LEU | 116 | -19.236 | 2.866  | -5.001 | 1.00 | 0.00 | C |
| ATOM | 1768 | H    | LEU | 116 | -22.071 | 5.419  | -3.150 | 1.00 | 0.00 | H |
| ATOM | 1769 | HA   | LEU | 116 | -22.048 | 2.610  | -4.009 | 1.00 | 0.00 | H |
| ATOM | 1770 | 2HB3 | LEU | 116 | -20.102 | 2.336  | -2.617 | 1.00 | 0.00 | H |
| ATOM | 1771 | HG   | LEU | 116 | -19.936 | 4.768  | -4.369 | 1.00 | 0.00 | H |
| ATOM | 1772 | 1HD1 | LEU | 116 | -18.323 | 5.221  | -2.686 | 1.00 | 0.00 | H |
| ATOM | 1773 | 2HD1 | LEU | 116 | -17.454 | 4.578  | -4.078 | 1.00 | 0.00 | H |
| ATOM | 1774 | 3HD1 | LEU | 116 | -17.764 | 3.546  | -2.681 | 1.00 | 0.00 | H |
| ATOM | 1775 | 1HD2 | LEU | 116 | -18.944 | 1.931  | -4.546 | 1.00 | 0.00 | H |
| ATOM | 1776 | 2HD2 | LEU | 116 | -18.451 | 3.209  | -5.657 | 1.00 | 0.00 | H |
| ATOM | 1777 | 3HD2 | LEU | 116 | -20.145 | 2.723  | -5.568 | 1.00 | 0.00 | H |
| ATOM | 1778 | HB2  | LEU | 116 | -20.264 | 4.003  | -1.979 | 1.00 | 0.00 | H |
| ATOM | 1779 | N    | THR | 117 | -22.706 | 1.541  | -1.748 | 1.00 | 0.00 | N |
| ATOM | 1780 | CA   | THR | 117 | -23.442 | 0.971  | -0.627 | 1.00 | 0.00 | C |
| ATOM | 1781 | C    | THR | 117 | -22.516 | 0.192  | 0.301  | 1.00 | 0.00 | C |
| ATOM | 1782 | O    | THR | 117 | -21.411 | -0.187 | -0.084 | 1.00 | 0.00 | O |
| ATOM | 1783 | CB   | THR | 117 | -24.568 | 0.039  | -1.111 | 1.00 | 0.00 | C |
| ATOM | 1784 | OG1  | THR | 117 | -24.036 | -0.953 | -1.996 | 1.00 | 0.00 | O |
| ATOM | 1785 | CG2  | THR | 117 | -25.657 | 0.829  | -1.821 | 1.00 | 0.00 | C |
| ATOM | 1786 | H    | THR | 117 | -22.191 | 0.948  | -2.334 | 1.00 | 0.00 | H |
| ATOM | 1787 | HA   | THR | 117 | -23.889 | 1.784  | -0.074 | 1.00 | 0.00 | H |
| ATOM | 1788 | HB   | THR | 117 | -25.003 | -0.452 | -0.251 | 1.00 | 0.00 | H |
| ATOM | 1789 | 1HG  | THR | 117 | -24.671 | -1.667 | -2.096 | 1.00 | 0.00 | H |
| ATOM | 1790 | 1HG2 | THR | 117 | -25.694 | 1.830  | -1.420 | 1.00 | 0.00 | H |
| ATOM | 1791 | 2HG2 | THR | 117 | -26.610 | 0.344  | -1.669 | 1.00 | 0.00 | H |
| ATOM | 1792 | 3HG2 | THR | 117 | -25.440 | 0.870  | -2.877 | 1.00 | 0.00 | H |
| ATOM | 1793 | N    | ASP | 118 | -22.975 | -0.043 | 1.526  | 1.00 | 0.00 | N |
| ATOM | 1794 | CA   | ASP | 118 | -22.189 | -0.779 | 2.509  | 1.00 | 0.00 | C |
| ATOM | 1795 | C    | ASP | 118 | -21.363 | -1.872 | 1.837  | 1.00 | 0.00 | C |
| ATOM | 1796 | O    | ASP | 118 | -20.192 | -2.066 | 2.158  | 1.00 | 0.00 | O |
| ATOM | 1797 | CB   | ASP | 118 | -23.102 | -1.392 | 3.571  | 1.00 | 0.00 | C |
| ATOM | 1798 | CG   | ASP | 118 | -23.366 | -0.447 | 4.724  | 1.00 | 0.00 | C |
| ATOM | 1799 | OD1  | ASP | 118 | -23.257 | 0.783  | 4.522  | 1.00 | 0.00 | O |
| ATOM | 1800 | OD2  | ASP | 118 | -23.683 | -0.933 | 5.829  | 1.00 | 0.00 | O |
| ATOM | 1801 | H    | ASP | 118 | -23.865 | 0.285  | 1.775  | 1.00 | 0.00 | H |
| ATOM | 1802 | HA   | ASP | 118 | -21.518 | -0.081 | 2.985  | 1.00 | 0.00 | H |
| ATOM | 1803 | 2HB3 | ASP | 118 | -22.642 | -2.287 | 3.959  | 1.00 | 0.00 | H |
| ATOM | 1804 | HB2  | ASP | 118 | -24.068 | -1.631 | 3.124  | 1.00 | 0.00 | H |
| ATOM | 1805 | N    | GLU | 119 | -21.985 | -2.586 | 0.903  | 1.00 | 0.00 | N |
| ATOM | 1806 | CA   | GLU | 119 | -21.308 | -3.660 | 0.184  | 1.00 | 0.00 | C |
| ATOM | 1807 | C    | GLU | 119 | -20.074 | -3.136 | -0.540 | 1.00 | 0.00 | C |
| ATOM | 1808 | O    | GLU | 119 | -18.960 | -3.605 | -0.307 | 1.00 | 0.00 | O |
| ATOM | 1809 | CB   | GLU | 119 | -22.263 | -4.317 | -0.815 | 1.00 | 0.00 | C |
| ATOM | 1810 | CG   | GLU | 119 | -23.413 | -5.060 | -0.160 | 1.00 | 0.00 | C |
| ATOM | 1811 | CD   | GLU | 119 | -22.950 | -6.251 | 0.657  | 1.00 | 0.00 | C |
| ATOM | 1812 | OE1  | GLU | 119 | -22.144 | -7.050 | 0.135  | 1.00 | 0.00 | O |
| ATOM | 1813 | OE2  | GLU | 119 | -23.391 | -6.383 | 1.818  | 1.00 | 0.00 | O |
| ATOM | 1814 | H    | GLU | 119 | -22.920 | -2.385 | 0.690  | 1.00 | 0.00 | H |
| ATOM | 1815 | HA   | GLU | 119 | -20.998 | -4.397 | 0.912  | 1.00 | 0.00 | H |
| ATOM | 1816 | 2HB3 | GLU | 119 | -21.705 | -5.018 | -1.417 | 1.00 | 0.00 | H |
| ATOM | 1817 | 2HG3 | GLU | 119 | -24.083 | -5.411 | -0.930 | 1.00 | 0.00 | H |
| ATOM | 1818 | HB2  | GLU | 119 | -22.713 | -3.550 | -1.444 | 1.00 | 0.00 | H |
| ATOM | 1819 | HG2  | GLU | 119 | -23.938 | -4.391 | 0.521  | 1.00 | 0.00 | H |
| ATOM | 1820 | N    | GLU | 120 | -20.279 | -2.164 | -1.422 | 1.00 | 0.00 | N |
| ATOM | 1821 | CA   | GLU | 120 | -19.183 | -1.577 | -2.183 | 1.00 | 0.00 | C |
| ATOM | 1822 | C    | GLU | 120 | -18.034 | -1.176 | -1.263 | 1.00 | 0.00 | C |
| ATOM | 1823 | O    | GLU | 120 | -16.886 | -1.569 | -1.477 | 1.00 | 0.00 | O |
| ATOM | 1824 | CB   | GLU | 120 | -19.671 | -0.358 | -2.966 | 1.00 | 0.00 | C |
| ATOM | 1825 | CG   | GLU | 120 | -20.751 | -0.682 | -3.986 | 1.00 | 0.00 | C |
| ATOM | 1826 | CD   | GLU | 120 | -20.465 | -1.956 | -4.756 | 1.00 | 0.00 | C |
| ATOM | 1827 | OE1  | GLU | 120 | -20.770 | -3.047 | -4.228 | 1.00 | 0.00 | O |
| ATOM | 1828 | OE2  | GLU | 120 | -19.934 | -1.864 | -5.881 | 1.00 | 0.00 | O |

|      |      |      |      |     |         |        |        |      |      |   |
|------|------|------|------|-----|---------|--------|--------|------|------|---|
| ATOM | 1829 | H    | GLU  | 120 | -21.192 | -1.833 | -1.563 | 1.00 | 0.00 | H |
| ATOM | 1830 | HA   | GLU  | 120 | -18.828 | -2.322 | -2.879 | 1.00 | 0.00 | H |
| ATOM | 1831 | 2HB3 | GLU  | 120 | -18.833 | 0.078  | -3.490 | 1.00 | 0.00 | H |
| ATOM | 1832 | 2HG3 | GLU  | 120 | -20.823 | 0.137  | -4.689 | 1.00 | 0.00 | H |
| ATOM | 1833 | HB2  | GLU  | 120 | -20.108 | 0.365  | -2.279 | 1.00 | 0.00 | H |
| ATOM | 1834 | HG2  | GLU  | 120 | -21.705 | -0.821 | -3.475 | 1.00 | 0.00 | H |
| ATOM | 1835 | N    | VAL  | 121 | -18.352 | -0.393 | -0.236 | 1.00 | 0.00 | N |
| ATOM | 1836 | CA   | VAL  | 121 | -17.347 | 0.060  | 0.718  | 1.00 | 0.00 | C |
| ATOM | 1837 | C    | VAL  | 121 | -16.676 | -1.120 | 1.412  | 1.00 | 0.00 | C |
| ATOM | 1838 | O    | VAL  | 121 | -15.458 | -1.139 | 1.589  | 1.00 | 0.00 | O |
| ATOM | 1839 | CB   | VAL  | 121 | -17.962 | 0.986  | 1.783  | 1.00 | 0.00 | C |
| ATOM | 1840 | CG1  | VAL  | 121 | -16.926 | 1.355  | 2.834  | 1.00 | 0.00 | C |
| ATOM | 1841 | CG2  | VAL  | 121 | -18.543 | 2.231  | 1.134  | 1.00 | 0.00 | C |
| ATOM | 1842 | H    | VAL  | 121 | -19.283 | -0.115 | -0.117 | 1.00 | 0.00 | H |
| ATOM | 1843 | HA   | VAL  | 121 | -16.599 | 0.618  | 0.175  | 1.00 | 0.00 | H |
| ATOM | 1844 | HB   | VAL  | 121 | -18.765 | 0.453  | 2.273  | 1.00 | 0.00 | H |
| ATOM | 1845 | 1HG1 | VAL  | 121 | -16.954 | 2.421  | 3.006  | 1.00 | 0.00 | H |
| ATOM | 1846 | 2HG1 | VAL  | 121 | -17.144 | 0.834  | 3.755  | 1.00 | 0.00 | H |
| ATOM | 1847 | 3HG1 | VAL  | 121 | -15.943 | 1.073  | 2.484  | 1.00 | 0.00 | H |
| ATOM | 1848 | 1HG2 | VAL  | 121 | -17.982 | 2.468  | 0.242  | 1.00 | 0.00 | H |
| ATOM | 1849 | 2HG2 | VAL  | 121 | -19.577 | 2.054  | 0.872  | 1.00 | 0.00 | H |
| ATOM | 1850 | 3HG2 | VAL  | 121 | -18.485 | 3.060  | 1.825  | 1.00 | 0.00 | H |
| ATOM | 1851 | N    | ASP  | 122 | -17.479 | -2.103 | 1.803  | 1.00 | 0.00 | N |
| ATOM | 1852 | CA   | ASP  | 122 | -16.963 | -3.290 | 2.477  | 1.00 | 0.00 | C |
| ATOM | 1853 | C    | ASP  | 122 | -15.774 | -3.872 | 1.720  | 1.00 | 0.00 | C |
| ATOM | 1854 | O    | ASP  | 122 | -14.746 | -4.197 | 2.314  | 1.00 | 0.00 | O |
| ATOM | 1855 | CB   | ASP  | 122 | -18.063 | -4.344 | 2.613  | 1.00 | 0.00 | C |
| ATOM | 1856 | CG   | ASP  | 122 | -18.844 | -4.203 | 3.905  | 1.00 | 0.00 | C |
| ATOM | 1857 | OD1  | ASP  | 122 | -18.262 | -3.722 | 4.899  | 1.00 | 0.00 | O |
| ATOM | 1858 | OD2  | ASP  | 122 | -20.036 | -4.574 | 3.922  | 1.00 | 0.00 | O |
| ATOM | 1859 | H    | ASP  | 122 | -18.442 | -2.031 | 1.634  | 1.00 | 0.00 | H |
| ATOM | 1860 | HA   | ASP  | 122 | -16.637 | -2.994 | 3.463  | 1.00 | 0.00 | H |
| ATOM | 1861 | 2HB3 | ASP  | 122 | -17.616 | -5.326 | 2.590  | 1.00 | 0.00 | H |
| ATOM | 1862 | HB2  | ASP  | 122 | -18.772 | -4.238 | 1.794  | 1.00 | 0.00 | H |
| ATOM | 1863 | N    | GLU  | 123 | -15.924 | -4.003 | 0.405  | 1.00 | 0.00 | N |
| ATOM | 1864 | CA   | GLU  | 123 | -14.861 | -4.547 | -0.434 | 1.00 | 0.00 | C |
| ATOM | 1865 | C    | GLU  | 123 | -13.599 | -3.695 | -0.335 | 1.00 | 0.00 | C |
| ATOM | 1866 | O    | GLU  | 123 | -12.484 | -4.201 | -0.469 | 1.00 | 0.00 | O |
| ATOM | 1867 | CB   | GLU  | 123 | -15.322 | -4.627 | -1.890 | 1.00 | 0.00 | C |
| ATOM | 1868 | CG   | GLU  | 123 | -16.564 | -5.479 | -2.089 | 1.00 | 0.00 | C |
| ATOM | 1869 | CD   | GLU  | 123 | -16.794 | -5.844 | -3.543 | 1.00 | 0.00 | C |
| ATOM | 1870 | OE1  | GLU  | 123 | -15.799 | -6.064 | -4.263 | 1.00 | 0.00 | O |
| ATOM | 1871 | OE2  | GLU  | 123 | -17.971 | -5.910 | -3.960 | 1.00 | 0.00 | O |
| ATOM | 1872 | H    | GLU  | 123 | -16.766 | -3.724 | -0.011 | 1.00 | 0.00 | H |
| ATOM | 1873 | HA   | GLU  | 123 | -14.638 | -5.543 | -0.079 | 1.00 | 0.00 | H |
| ATOM | 1874 | 2HB3 | GLU  | 123 | -14.524 | -5.049 | -2.484 | 1.00 | 0.00 | H |
| ATOM | 1875 | 2HG3 | GLU  | 123 | -17.423 | -4.930 | -1.731 | 1.00 | 0.00 | H |
| ATOM | 1876 | HB2  | GLU  | 123 | -15.573 | -3.629 | -2.248 | 1.00 | 0.00 | H |
| ATOM | 1877 | HG2  | GLU  | 123 | -16.456 | -6.414 | -1.539 | 1.00 | 0.00 | H |
| ATOM | 1878 | N    | MET  | 124 | -13.783 | -2.401 | -0.097 | 1.00 | 0.00 | N |
| ATOM | 1879 | CA   | MET  | 124 | -12.657 | -1.478 | 0.020  | 1.00 | 0.00 | C |
| ATOM | 1880 | C    | MET  | 124 | -11.961 | -1.641 | 1.368  | 1.00 | 0.00 | C |
| ATOM | 1881 | O    | MET  | 124 | -10.737 | -1.759 | 1.433  | 1.00 | 0.00 | O |
| ATOM | 1882 | CB   | MET  | 124 | -13.135 | -0.035 | -0.151 | 1.00 | 0.00 | C |
| ATOM | 1883 | CG   | MET  | 124 | -12.073 | 0.999  | 0.181  | 1.00 | 0.00 | C |
| ATOM | 1884 | SD   | MET  | 124 | -12.316 | 2.554  | -0.699 | 1.00 | 0.00 | S |
| ATOM | 1885 | CE   | MET  | 124 | -11.018 | 3.557  | 0.021  | 1.00 | 0.00 | C |
| ATOM | 1886 | H    | MET  | 124 | -14.695 | -2.055 | 0.000  | 1.00 | 0.00 | H |
| ATOM | 1887 | HA   | MET  | 124 | -11.956 | -1.712 | -0.766 | 1.00 | 0.00 | H |
| ATOM | 1888 | 2HB3 | MET  | 124 | -13.983 | 0.131  | 0.496  | 1.00 | 0.00 | H |
| ATOM | 1889 | 2HG3 | MET  | 124 | -11.104 | 0.598  | -0.084 | 1.00 | 0.00 | H |
| ATOM | 1890 | 1HE  | MET  | 124 | -11.429 | 4.505  | 0.336  | 1.00 | 0.00 | H |
| ATOM | 1891 | 2HE  | MET  | 124 | -10.600 | 3.047  | 0.875  | 1.00 | 0.00 | H |
| ATOM | 1892 | 3HE  | MET  | 124 | -10.245 | 3.724  | -0.713 | 1.00 | 0.00 | H |
| ATOM | 1893 | HB2  | MET  | 124 | -13.416 | 0.133  | -1.191 | 1.00 | 0.00 | H |
| ATOM | 1894 | HG2  | MET  | 124 | -12.108 | 1.229  | 1.247  | 1.00 | 0.00 | H |
| ATOM | 1895 | N    | I LE | 125 | -12.748 | -1.645 | 2.438  | 1.00 | 0.00 | N |
| ATOM | 1896 | CA   | I LE | 125 | -12.205 | -1.792 | 3.783  | 1.00 | 0.00 | C |
| ATOM | 1897 | C    | I LE | 125 | -11.299 | -3.015 | 3.879  | 1.00 | 0.00 | C |
| ATOM | 1898 | O    | I LE | 125 | -10.200 | -2.944 | 4.428  | 1.00 | 0.00 | O |
| ATOM | 1899 | CB   | I LE | 125 | -13.326 | -1.914 | 4.832  | 1.00 | 0.00 | C |
| ATOM | 1900 | CG2  | I LE | 125 | -12.743 | -2.255 | 6.194  | 1.00 | 0.00 | C |
| ATOM | 1901 | CG1  | I LE | 125 | -14.134 | -0.616 | 4.900  | 1.00 | 0.00 | C |
| ATOM | 1902 | CD1  | I LE | 125 | -13.355 | 0.550  | 5.469  | 1.00 | 0.00 | C |
| ATOM | 1903 | H    | I LE | 125 | -13.716 | -1.547 | 2.321  | 1.00 | 0.00 | H |
| ATOM | 1904 | HA   | I LE | 125 | -11.625 | -0.908 | 4.006  | 1.00 | 0.00 | H |
| ATOM | 1905 | HB   | I LE | 125 | -13.980 | -2.721 | 4.535  | 1.00 | 0.00 | H |

|      |      |      |      |     |         |         |        |      |      |   |
|------|------|------|------|-----|---------|---------|--------|------|------|---|
| ATOM | 1906 | 1HG2 | I LE | 125 | -12.214 | -1.398  | 6.583  | 1.00 | 0.00 | H |
| ATOM | 1907 | 2HG2 | I LE | 125 | -13.539 | -2.524  | 6.871  | 1.00 | 0.00 | H |
| ATOM | 1908 | 3HG2 | I LE | 125 | -12.058 | -3.086  | 6.096  | 1.00 | 0.00 | H |
| ATOM | 1909 | 2HG3 | I LE | 125 | -15.000 | -0.773  | 5.527  | 1.00 | 0.00 | H |
| ATOM | 1910 | 1HD1 | I LE | 125 | -12.308 | 0.291   | 5.521  | 1.00 | 0.00 | H |
| ATOM | 1911 | 2HD1 | I LE | 125 | -13.484 | 1.412   | 4.832  | 1.00 | 0.00 | H |
| ATOM | 1912 | 3HD1 | I LE | 125 | -13.718 | 0.776   | 6.461  | 1.00 | 0.00 | H |
| ATOM | 1913 | HG2  | I LE | 125 | -14.449 | -0.330  | 3.898  | 1.00 | 0.00 | H |
| ATOM | 1914 | N    | ARG  | 126 | -11.768 | -4.135  | 3.337  | 1.00 | 0.00 | N |
| ATOM | 1915 | CA   | ARG  | 126 | -10.998 | -5.374  | 3.361  | 1.00 | 0.00 | C |
| ATOM | 1916 | C    | ARG  | 126 | -9.695  | -5.220  | 2.584  | 1.00 | 0.00 | C |
| ATOM | 1917 | O    | ARG  | 126 | -8.841  | -6.106  | 2.603  | 1.00 | 0.00 | O |
| ATOM | 1918 | CB   | ARG  | 126 | -11.823 | -6.522  | 2.774  | 1.00 | 0.00 | C |
| ATOM | 1919 | CG   | ARG  | 126 | -11.947 | -6.470  | 1.261  | 1.00 | 0.00 | C |
| ATOM | 1920 | CD   | ARG  | 126 | -12.213 | -7.847  | 0.676  | 1.00 | 0.00 | C |
| ATOM | 1921 | NE   | ARG  | 126 | -11.065 | -8.737  | 0.825  | 1.00 | 0.00 | N |
| ATOM | 1922 | CZ   | ARG  | 126 | -11.140 | -10.059 | 0.725  | 1.00 | 0.00 | C |
| ATOM | 1923 | NH1  | ARG  | 126 | -12.305 | -10.643 | 0.473  | 1.00 | 0.00 | N |
| ATOM | 1924 | NH2  | ARG  | 126 | -10.050 | -10.801 | 0.873  | 1.00 | 0.00 | N |
| ATOM | 1925 | H    | ARG  | 126 | -12.651 | -4.128  | 2.913  | 1.00 | 0.00 | H |
| ATOM | 1926 | HA   | ARG  | 126 | -10.766 | -5.600  | 4.391  | 1.00 | 0.00 | H |
| ATOM | 1927 | 2HB3 | ARG  | 126 | -12.814 | -6.489  | 3.196  | 1.00 | 0.00 | H |
| ATOM | 1928 | 2HG3 | ARG  | 126 | -11.028 | -6.083  | 0.846  | 1.00 | 0.00 | H |
| ATOM | 1929 | 2HD3 | ARG  | 126 | -12.439 | -7.740  | -0.375 | 1.00 | 0.00 | H |
| ATOM | 1930 | HE   | ARG  | 126 | -10.193 | -8.326  | 1.010  | 1.00 | 0.00 | H |
| ATOM | 1931 | 1HH1 | ARG  | 126 | -13.127 | -10.086 | 0.359  | 1.00 | 0.00 | H |
| ATOM | 1932 | 2HH1 | ARG  | 126 | -12.360 | -11.639 | 0.397  | 1.00 | 0.00 | H |
| ATOM | 1933 | 1HH2 | ARG  | 126 | -9.171  | -10.365 | 1.062  | 1.00 | 0.00 | H |
| ATOM | 1934 | 2HH2 | ARG  | 126 | -10.109 | -11.797 | 0.796  | 1.00 | 0.00 | H |
| ATOM | 1935 | HB2  | ARG  | 126 | -11.342 | -7.471  | 3.007  | 1.00 | 0.00 | H |
| ATOM | 1936 | HG2  | ARG  | 126 | -12.780 | -5.821  | 0.986  | 1.00 | 0.00 | H |
| ATOM | 1937 | HD2  | ARG  | 126 | -13.052 | -8.310  | 1.198  | 1.00 | 0.00 | H |
| ATOM | 1938 | N    | GLU  | 127 | -9.549  | -4.089  | 1.901  | 1.00 | 0.00 | N |
| ATOM | 1939 | CA   | GLU  | 127 | -8.350  | -3.821  | 1.115  | 1.00 | 0.00 | C |
| ATOM | 1940 | C    | GLU  | 127 | -7.268  | -3.178  | 1.980  | 1.00 | 0.00 | C |
| ATOM | 1941 | O    | GLU  | 127 | -6.139  | -3.665  | 2.044  | 1.00 | 0.00 | O |
| ATOM | 1942 | CB   | GLU  | 127 | -8.681  | -2.910  | -0.067 | 1.00 | 0.00 | C |
| ATOM | 1943 | CG   | GLU  | 127 | -7.685  | -3.010  | -1.210 | 1.00 | 0.00 | C |
| ATOM | 1944 | CD   | GLU  | 127 | -7.642  | -1.754  | -2.058 | 1.00 | 0.00 | C |
| ATOM | 1945 | OE1  | GLU  | 127 | -8.683  | -1.404  | -2.655 | 1.00 | 0.00 | O |
| ATOM | 1946 | OE2  | GLU  | 127 | -6.570  | -1.119  | -2.127 | 1.00 | 0.00 | O |
| ATOM | 1947 | H    | GLU  | 127 | -10.264 | -3.420  | 1.926  | 1.00 | 0.00 | H |
| ATOM | 1948 | HA   | GLU  | 127 | -7.982  | -4.762  | 0.741  | 1.00 | 0.00 | H |
| ATOM | 1949 | 2HB3 | GLU  | 127 | -8.700  | -1.886  | 0.275  | 1.00 | 0.00 | H |
| ATOM | 1950 | 2HG3 | GLU  | 127 | -7.962  | -3.842  | -1.841 | 1.00 | 0.00 | H |
| ATOM | 1951 | HB2  | GLU  | 127 | -9.650  | -3.189  | -0.482 | 1.00 | 0.00 | H |
| ATOM | 1952 | HG2  | GLU  | 127 | -6.684  | -3.159  | -0.808 | 1.00 | 0.00 | H |
| ATOM | 1953 | N    | ALA  | 128 | -7.619  | -2.079  | 2.638  | 1.00 | 0.00 | N |
| ATOM | 1954 | CA   | ALA  | 128 | -6.681  | -1.370  | 3.500  | 1.00 | 0.00 | C |
| ATOM | 1955 | C    | ALA  | 128 | -6.681  | -1.951  | 4.909  | 1.00 | 0.00 | C |
| ATOM | 1956 | O    | ALA  | 128 | -5.630  | -2.094  | 5.532  | 1.00 | 0.00 | O |
| ATOM | 1957 | CB   | ALA  | 128 | -7.017  | 0.112   | 3.537  | 1.00 | 0.00 | C |
| ATOM | 1958 | H    | ALA  | 128 | -8.534  | -1.739  | 2.548  | 1.00 | 0.00 | H |
| ATOM | 1959 | HA   | ALA  | 128 | -5.693  | -1.480  | 3.076  | 1.00 | 0.00 | H |
| ATOM | 1960 | 1HB  | ALA  | 128 | -7.762  | 0.332   | 2.787  | 1.00 | 0.00 | H |
| ATOM | 1961 | 2HB  | ALA  | 128 | -7.402  | 0.369   | 4.513  | 1.00 | 0.00 | H |
| ATOM | 1962 | 3HB  | ALA  | 128 | -6.125  | 0.689   | 3.340  | 1.00 | 0.00 | H |
| ATOM | 1963 | N    | ASP  | 129 | -7.867  | -2.284  | 5.407  | 1.00 | 0.00 | N |
| ATOM | 1964 | CA   | ASP  | 129 | -8.002  | -2.851  | 6.743  | 1.00 | 0.00 | C |
| ATOM | 1965 | C    | ASP  | 129 | -7.145  | -4.103  | 6.894  | 1.00 | 0.00 | C |
| ATOM | 1966 | O    | ASP  | 129 | -7.445  | -5.147  | 6.313  | 1.00 | 0.00 | O |
| ATOM | 1967 | CB   | ASP  | 129 | -9.469  | -3.184  | 7.031  | 1.00 | 0.00 | C |
| ATOM | 1968 | CG   | ASP  | 129 | -9.774  | -3.205  | 8.517  | 1.00 | 0.00 | C |
| ATOM | 1969 | OD1  | ASP  | 129 | -8.821  | -3.305  | 9.317  | 1.00 | 0.00 | O |
| ATOM | 1970 | OD2  | ASP  | 129 | -10.968 | -3.124  | 8.877  | 1.00 | 0.00 | O |
| ATOM | 1971 | H    | ASP  | 129 | -8.668  | -2.148  | 4.862  | 1.00 | 0.00 | H |
| ATOM | 1972 | HA   | ASP  | 129 | -7.664  | -2.111  | 7.454  | 1.00 | 0.00 | H |
| ATOM | 1973 | 2HB3 | ASP  | 129 | -9.697  | -4.156  | 6.621  | 1.00 | 0.00 | H |
| ATOM | 1974 | HB2  | ASP  | 129 | -10.110 | -2.428  | 6.579  | 1.00 | 0.00 | H |
| ATOM | 1975 | N    | I LE | 130 | -6.076  | -3.991  | 7.676  | 1.00 | 0.00 | N |
| ATOM | 1976 | CA   | I LE | 130 | -5.176  | -5.114  | 7.902  | 1.00 | 0.00 | C |
| ATOM | 1977 | C    | I LE | 130 | -5.687  | -6.013  | 9.020  | 1.00 | 0.00 | C |
| ATOM | 1978 | O    | I LE | 130 | -5.989  | -7.187  | 8.799  | 1.00 | 0.00 | O |
| ATOM | 1979 | CB   | I LE | 130 | -3.755  | -4.635  | 8.256  | 1.00 | 0.00 | C |
| ATOM | 1980 | CG2  | I LE | 130 | -2.781  | -5.804  | 8.240  | 1.00 | 0.00 | C |
| ATOM | 1981 | CG1  | I LE | 130 | -3.304  | -3.546  | 7.280  | 1.00 | 0.00 | C |
| ATOM | 1982 | CD1  | I LE | 130 | -3.066  | -4.053  | 5.874  | 1.00 | 0.00 | C |

|      |      |      |     |     |         |        |        |      |      |   |
|------|------|------|-----|-----|---------|--------|--------|------|------|---|
| ATOM | 1983 | H    | ILE | 130 | -5.891  | -3.135 | 8.111  | 1.00 | 0.00 | H |
| ATOM | 1984 | HA   | ILE | 130 | -5.122  | -5.688 | 6.989  | 1.00 | 0.00 | H |
| ATOM | 1985 | HB   | ILE | 130 | -3.775  | -4.225 | 9.255  | 1.00 | 0.00 | H |
| ATOM | 1986 | 1HG2 | ILE | 130 | -1.778  | -5.437 | 8.399  | 1.00 | 0.00 | H |
| ATOM | 1987 | 2HG2 | ILE | 130 | -3.040  | -6.496 | 9.026  | 1.00 | 0.00 | H |
| ATOM | 1988 | 3HG2 | ILE | 130 | -2.835  | -6.305 | 7.285  | 1.00 | 0.00 | H |
| ATOM | 1989 | 2HG3 | ILE | 130 | -2.382  | -3.112 | 7.638  | 1.00 | 0.00 | H |
| ATOM | 1990 | 1HD1 | ILE | 130 | -2.031  | -4.338 | 5.765  | 1.00 | 0.00 | H |
| ATOM | 1991 | 2HD1 | ILE | 130 | -3.698  | -4.908 | 5.688  | 1.00 | 0.00 | H |
| ATOM | 1992 | 3HD1 | ILE | 130 | -3.300  | -3.272 | 5.166  | 1.00 | 0.00 | H |
| ATOM | 1993 | HG2  | ILE | 130 | -4.075  | -2.777 | 7.212  | 1.00 | 0.00 | H |
| ATOM | 1994 | N    | ASP | 131 | -5.787  | -5.458 | 10.223 | 1.00 | 0.00 | N |
| ATOM | 1995 | CA   | ASP | 131 | -6.267  | -6.208 | 11.378 | 1.00 | 0.00 | C |
| ATOM | 1996 | C    | ASP | 131 | -7.638  | -6.817 | 11.097 | 1.00 | 0.00 | C |
| ATOM | 1997 | O    | ASP | 131 | -7.880  | -7.987 | 11.388 | 1.00 | 0.00 | O |
| ATOM | 1998 | CB   | ASP | 131 | -6.338  | -5.304 | 12.607 | 1.00 | 0.00 | C |
| ATOM | 1999 | CG   | ASP | 131 | -7.400  | -4.230 | 12.476 | 1.00 | 0.00 | C |
| ATOM | 2000 | OD1  | ASP | 131 | -7.411  | -3.530 | 11.442 | 1.00 | 0.00 | O |
| ATOM | 2001 | OD2  | ASP | 131 | -8.220  | -4.089 | 13.409 | 1.00 | 0.00 | O |
| ATOM | 2002 | H    | ASP | 131 | -5.531  | -4.517 | 10.336 | 1.00 | 0.00 | H |
| ATOM | 2003 | HA   | ASP | 131 | -5.564  | -7.005 | 11.569 | 1.00 | 0.00 | H |
| ATOM | 2004 | 2HB3 | ASP | 131 | -5.381  | -4.822 | 12.747 | 1.00 | 0.00 | H |
| ATOM | 2005 | HB2  | ASP | 131 | -6.586  | -5.900 | 13.486 | 1.00 | 0.00 | H |
| ATOM | 2006 | N    | GLY | 132 | -8.532  | -6.013 | 10.532 | 1.00 | 0.00 | N |
| ATOM | 2007 | CA   | GLY | 132 | -9.868  | -6.488 | 10.224 | 1.00 | 0.00 | C |
| ATOM | 2008 | C    | GLY | 132 | -10.895 | -6.034 | 11.242 | 1.00 | 0.00 | C |
| ATOM | 2009 | O    | GLY | 132 | -11.734 | -6.820 | 11.682 | 1.00 | 0.00 | O |
| ATOM | 2010 | H    | GLY | 132 | -8.284  | -5.088 | 10.322 | 1.00 | 0.00 | H |
| ATOM | 2011 | 2HA  | GLY | 132 | -10.154 | -6.120 | 9.252  | 1.00 | 0.00 | H |
| ATOM | 2012 | 3HA  | GLY | 132 | -9.856  | -7.568 | 10.200 | 1.00 | 0.00 | H |
| ATOM | 2013 | N    | ASP | 133 | -10.828 | -4.762 | 11.622 | 1.00 | 0.00 | N |
| ATOM | 2014 | CA   | ASP | 133 | -11.756 | -4.204 | 12.596 | 1.00 | 0.00 | C |
| ATOM | 2015 | C    | ASP | 133 | -12.770 | -3.289 | 11.916 | 1.00 | 0.00 | C |
| ATOM | 2016 | O    | ASP | 133 | -13.451 | -2.504 | 12.573 | 1.00 | 0.00 | O |
| ATOM | 2017 | CB   | ASP | 133 | -10.997 | -3.432 | 13.675 | 1.00 | 0.00 | C |
| ATOM | 2018 | CG   | ASP | 133 | -10.154 | -2.313 | 13.102 | 1.00 | 0.00 | C |
| ATOM | 2019 | OD1  | ASP | 133 | -10.314 | -2.004 | 11.902 | 1.00 | 0.00 | O |
| ATOM | 2020 | OD2  | ASP | 133 | -9.331  | -1.744 | 13.852 | 1.00 | 0.00 | O |
| ATOM | 2021 | H    | ASP | 133 | -10.134 | -4.185 | 11.235 | 1.00 | 0.00 | H |
| ATOM | 2022 | HA   | ASP | 133 | -12.287 | -5.025 | 13.056 | 1.00 | 0.00 | H |
| ATOM | 2023 | 2HB3 | ASP | 133 | -10.348 | -4.115 | 14.205 | 1.00 | 0.00 | H |
| ATOM | 2024 | HB2  | ASP | 133 | -11.708 | -2.982 | 14.368 | 1.00 | 0.00 | H |
| ATOM | 2025 | N    | GLY | 134 | -12.863 | -3.393 | 10.594 | 1.00 | 0.00 | N |
| ATOM | 2026 | CA   | GLY | 134 | -13.792 | -2.566 | 9.848  | 1.00 | 0.00 | C |
| ATOM | 2027 | C    | GLY | 134 | -13.413 | -1.099 | 9.871  | 1.00 | 0.00 | C |
| ATOM | 2028 | O    | GLY | 134 | -14.281 | -0.226 | 9.853  | 1.00 | 0.00 | O |
| ATOM | 2029 | H    | GLY | 134 | -12.294 | -4.036 | 10.121 | 1.00 | 0.00 | H |
| ATOM | 2030 | 2HA  | GLY | 134 | -13.816 | -2.905 | 8.822  | 1.00 | 0.00 | H |
| ATOM | 2031 | 3HA  | GLY | 134 | -14.778 | -2.678 | 10.275 | 1.00 | 0.00 | H |
| ATOM | 2032 | N    | GLN | 135 | -12.113 | -0.826 | 9.911  | 1.00 | 0.00 | N |
| ATOM | 2033 | CA   | GLN | 135 | -11.621 | 0.548  | 9.938  | 1.00 | 0.00 | C |
| ATOM | 2034 | C    | GLN | 135 | -10.379 | 0.697  | 9.066  | 1.00 | 0.00 | C |
| ATOM | 2035 | O    | GLN | 135 | -9.741  | -0.288 | 8.700  | 1.00 | 0.00 | O |
| ATOM | 2036 | CB   | GLN | 135 | -11.304 | 0.967  | 11.374 | 1.00 | 0.00 | C |
| ATOM | 2037 | CG   | GLN | 135 | -12.397 | 0.608  | 12.369 | 1.00 | 0.00 | C |
| ATOM | 2038 | CD   | GLN | 135 | -12.474 | 1.582  | 13.528 | 1.00 | 0.00 | C |
| ATOM | 2039 | OE1  | GLN | 135 | -13.058 | 2.660  | 13.410 | 1.00 | 0.00 | O |
| ATOM | 2040 | NE2  | GLN | 135 | -11.882 | 1.210  | 14.657 | 1.00 | 0.00 | N |
| ATOM | 2041 | H    | GLN | 135 | -11.470 | -1.564 | 9.921  | 1.00 | 0.00 | H |
| ATOM | 2042 | HA   | GLN | 135 | -12.399 | 1.186  | 9.550  | 1.00 | 0.00 | H |
| ATOM | 2043 | 2HB3 | GLN | 135 | -11.163 | 2.037  | 11.400 | 1.00 | 0.00 | H |
| ATOM | 2044 | 2HG3 | GLN | 135 | -12.198 | -0.379 | 12.760 | 1.00 | 0.00 | H |
| ATOM | 2045 | 1HE2 | GLN | 135 | -11.434 | 0.337  | 14.678 | 1.00 | 0.00 | H |
| ATOM | 2046 | 2HE2 | GLN | 135 | -11.916 | 1.819  | 15.421 | 1.00 | 0.00 | H |
| ATOM | 2047 | HB2  | GLN | 135 | -10.401 | 0.459  | 11.711 | 1.00 | 0.00 | H |
| ATOM | 2048 | HG2  | GLN | 135 | -13.364 | 0.629  | 11.868 | 1.00 | 0.00 | H |
| ATOM | 2049 | N    | VAL | 136 | -10.043 | 1.939  | 8.734  | 1.00 | 0.00 | N |
| ATOM | 2050 | CA   | VAL | 136 | -8.878  | 2.221  | 7.905  | 1.00 | 0.00 | C |
| ATOM | 2051 | C    | VAL | 136 | -8.062  | 3.375  | 8.476  | 1.00 | 0.00 | C |
| ATOM | 2052 | O    | VAL | 136 | -8.179  | 4.514  | 8.023  | 1.00 | 0.00 | O |
| ATOM | 2053 | CB   | VAL | 136 | -9.286  | 2.561  | 6.459  | 1.00 | 0.00 | C |
| ATOM | 2054 | CG1  | VAL | 136 | -8.061  | 2.896  | 5.623  | 1.00 | 0.00 | C |
| ATOM | 2055 | CG2  | VAL | 136 | -10.066 | 1.409  | 5.841  | 1.00 | 0.00 | C |
| ATOM | 2056 | H    | VAL | 136 | -10.591 | 2.685  | 9.057  | 1.00 | 0.00 | H |
| ATOM | 2057 | HA   | VAL | 136 | -8.261  | 1.333  | 7.884  | 1.00 | 0.00 | H |
| ATOM | 2058 | HB   | VAL | 136 | -9.927  | 3.430  | 6.483  | 1.00 | 0.00 | H |
| ATOM | 2059 | 1HG1 | VAL | 136 | -7.897  | 3.964  | 5.636  | 1.00 | 0.00 | H |

|      |      |      |     |     |         |        |        |      |      |   |
|------|------|------|-----|-----|---------|--------|--------|------|------|---|
| ATOM | 2060 | 2HG1 | VAL | 136 | -7.197  | 2.393  | 6.031  | 1.00 | 0.00 | H |
| ATOM | 2061 | 3HG1 | VAL | 136 | -8.221  | 2.571  | 4.606  | 1.00 | 0.00 | H |
| ATOM | 2062 | 1HG2 | VAL | 136 | -9.393  | 0.783  | 5.275  | 1.00 | 0.00 | H |
| ATOM | 2063 | 2HG2 | VAL | 136 | -10.527 | 0.824  | 6.625  | 1.00 | 0.00 | H |
| ATOM | 2064 | 3HG2 | VAL | 136 | -10.830 | 1.802  | 5.188  | 1.00 | 0.00 | H |
| ATOM | 2065 | N    | ASN | 137 | -7.236  | 3.075  | 9.472  | 1.00 | 0.00 | N |
| ATOM | 2066 | CA   | ASN | 137 | -6.400  | 4.088  | 10.107 | 1.00 | 0.00 | C |
| ATOM | 2067 | C    | ASN | 137 | -5.349  | 4.611  | 9.133  | 1.00 | 0.00 | C |
| ATOM | 2068 | O    | ASN | 137 | -5.271  | 4.167  | 7.988  | 1.00 | 0.00 | O |
| ATOM | 2069 | CB   | ASN | 137 | -5.721  | 3.512  | 11.350 | 1.00 | 0.00 | C |
| ATOM | 2070 | CG   | ASN | 137 | -5.093  | 2.157  | 11.090 | 1.00 | 0.00 | C |
| ATOM | 2071 | OD1  | ASN | 137 | -5.758  | 1.124  | 11.176 | 1.00 | 0.00 | O |
| ATOM | 2072 | ND2  | ASN | 137 | -3.803  | 2.154  | 10.771 | 1.00 | 0.00 | N |
| ATOM | 2073 | H    | ASN | 137 | -7.188  | 2.148  | 9.790  | 1.00 | 0.00 | H |
| ATOM | 2074 | HA   | ASN | 137 | -7.041  | 4.905  | 10.403 | 1.00 | 0.00 | H |
| ATOM | 2075 | 2HB3 | ASN | 137 | -6.452  | 3.406  | 12.138 | 1.00 | 0.00 | H |
| ATOM | 2076 | 1HD2 | ASN | 137 | -3.337  | 3.014  | 10.721 | 1.00 | 0.00 | H |
| ATOM | 2077 | 2HD2 | ASN | 137 | -3.372  | 1.290  | 10.599 | 1.00 | 0.00 | H |
| ATOM | 2078 | HB2  | ASN | 137 | -4.922  | 4.182  | 11.671 | 1.00 | 0.00 | H |
| ATOM | 2079 | N    | TYR | 138 | -4.541  | 5.557  | 9.598  | 1.00 | 0.00 | N |
| ATOM | 2080 | CA   | TYR | 138 | -3.495  | 6.144  | 8.769  | 1.00 | 0.00 | C |
| ATOM | 2081 | C    | TYR | 138 | -2.619  | 5.058  | 8.148  | 1.00 | 0.00 | C |
| ATOM | 2082 | O    | TYR | 138 | -2.490  | 4.975  | 6.927  | 1.00 | 0.00 | O |
| ATOM | 2083 | CB   | TYR | 138 | -2.631  | 7.096  | 9.597  | 1.00 | 0.00 | C |
| ATOM | 2084 | CG   | TYR | 138 | -1.546  | 7.779  | 8.797  | 1.00 | 0.00 | C |
| ATOM | 2085 | CD1  | TYR | 138 | -1.857  | 8.598  | 7.719  | 1.00 | 0.00 | C |
| ATOM | 2086 | CE1  | TYR | 138 | -0.866  | 9.223  | 6.986  | 1.00 | 0.00 | C |
| ATOM | 2087 | CZ   | TYR | 138 | 0.456   | 9.034  | 7.328  | 1.00 | 0.00 | C |
| ATOM | 2088 | CE2  | TYR | 138 | 0.792   | 8.226  | 8.394  | 1.00 | 0.00 | C |
| ATOM | 2089 | CD2  | TYR | 138 | -0.205  | 7.604  | 9.120  | 1.00 | 0.00 | C |
| ATOM | 2090 | OH   | TYR | 138 | 1.445   | 9.655  | 6.601  | 1.00 | 0.00 | O |
| ATOM | 2091 | H    | TYR | 138 | -4.652  | 5.871  | 10.519 | 1.00 | 0.00 | H |
| ATOM | 2092 | HA   | TYR | 138 | -3.972  | 6.703  | 7.977  | 1.00 | 0.00 | H |
| ATOM | 2093 | 2HB3 | TYR | 138 | -2.160  | 6.543  | 10.396 | 1.00 | 0.00 | H |
| ATOM | 2094 | 1HD  | TYR | 138 | -2.895  | 8.745  | 7.457  | 1.00 | 0.00 | H |
| ATOM | 2095 | 1HE  | TYR | 138 | -1.130  | 9.856  | 6.152  | 1.00 | 0.00 | H |
| ATOM | 2096 | 2HE  | TYR | 138 | 1.828   | 8.077  | 8.660  | 1.00 | 0.00 | H |
| ATOM | 2097 | 2HD  | TYR | 138 | 0.056   | 6.970  | 9.956  | 1.00 | 0.00 | H |
| ATOM | 2098 | HH   | TYR | 138 | 1.820   | 9.031  | 5.973  | 1.00 | 0.00 | H |
| ATOM | 2099 | HB2  | TYR | 138 | -3.258  | 7.888  | 10.010 | 1.00 | 0.00 | H |
| ATOM | 2100 | N    | GLU | 139 | -2.021  | 4.230  | 8.999  | 1.00 | 0.00 | N |
| ATOM | 2101 | CA   | GLU | 139 | -1.159  | 3.150  | 8.534  | 1.00 | 0.00 | C |
| ATOM | 2102 | C    | GLU | 139 | -1.870  | 2.301  | 7.481  | 1.00 | 0.00 | C |
| ATOM | 2103 | O    | GLU | 139 | -1.322  | 2.036  | 6.413  | 1.00 | 0.00 | O |
| ATOM | 2104 | CB   | GLU | 139 | -0.730  | 2.270  | 9.711  | 1.00 | 0.00 | C |
| ATOM | 2105 | CG   | GLU | 139 | 0.166   | 1.110  | 9.306  | 1.00 | 0.00 | C |
| ATOM | 2106 | CD   | GLU | 139 | 0.004   | -0.094 | 10.214 | 1.00 | 0.00 | C |
| ATOM | 2107 | OE1  | GLU | 139 | -1.096  | -0.274 | 10.773 | 1.00 | 0.00 | O |
| ATOM | 2108 | OE2  | GLU | 139 | 0.981   | -0.857 | 10.364 | 1.00 | 0.00 | O |
| ATOM | 2109 | H    | GLU | 139 | -2.165  | 4.348  | 9.961  | 1.00 | 0.00 | H |
| ATOM | 2110 | HA   | GLU | 139 | -0.284  | 3.594  | 8.091  | 1.00 | 0.00 | H |
| ATOM | 2111 | 2HB3 | GLU | 139 | -1.612  | 1.867  | 10.184 | 1.00 | 0.00 | H |
| ATOM | 2112 | 2HG3 | GLU | 139 | 1.194   | 1.436  | 9.345  | 1.00 | 0.00 | H |
| ATOM | 2113 | HB2  | GLU | 139 | -0.159  | 2.867  | 10.422 | 1.00 | 0.00 | H |
| ATOM | 2114 | HG2  | GLU | 139 | -0.090  | 0.789  | 8.296  | 1.00 | 0.00 | H |
| ATOM | 2115 | N    | GLU | 140 | -3.089  | 1.878  | 7.797  | 1.00 | 0.00 | N |
| ATOM | 2116 | CA   | GLU | 140 | -3.874  | 1.059  | 6.880  | 1.00 | 0.00 | C |
| ATOM | 2117 | C    | GLU | 140 | -4.148  | 1.809  | 5.580  | 1.00 | 0.00 | C |
| ATOM | 2118 | O    | GLU | 140 | -4.154  | 1.219  | 4.498  | 1.00 | 0.00 | O |
| ATOM | 2119 | CB   | GLU | 140 | -5.193  | 0.644  | 7.532  | 1.00 | 0.00 | C |
| ATOM | 2120 | CG   | GLU | 140 | -5.022  | -0.297 | 8.712  | 1.00 | 0.00 | C |
| ATOM | 2121 | CD   | GLU | 140 | -6.340  | -0.641 | 9.380  | 1.00 | 0.00 | C |
| ATOM | 2122 | OE1  | GLU | 140 | -7.206  | 0.252  | 9.479  | 1.00 | 0.00 | O |
| ATOM | 2123 | OE2  | GLU | 140 | -6.502  | -1.805 | 9.802  | 1.00 | 0.00 | O |
| ATOM | 2124 | H    | GLU | 140 | -3.472  | 2.122  | 8.665  | 1.00 | 0.00 | H |
| ATOM | 2125 | HA   | GLU | 140 | -3.299  | 0.172  | 6.656  | 1.00 | 0.00 | H |
| ATOM | 2126 | 2HB3 | GLU | 140 | -5.806  | 0.152  | 6.791  | 1.00 | 0.00 | H |
| ATOM | 2127 | 2HG3 | GLU | 140 | -4.378  | 0.174  | 9.440  | 1.00 | 0.00 | H |
| ATOM | 2128 | HB2  | GLU | 140 | -5.702  | 1.529  | 7.916  | 1.00 | 0.00 | H |
| ATOM | 2129 | HG2  | GLU | 140 | -4.581  | -1.232 | 8.369  | 1.00 | 0.00 | H |
| ATOM | 2130 | N    | PHE | 141 | -4.374  | 3.112  | 5.691  | 1.00 | 0.00 | N |
| ATOM | 2131 | CA   | PHE | 141 | -4.649  | 3.943  | 4.525  | 1.00 | 0.00 | C |
| ATOM | 2132 | C    | PHE | 141 | -3.414  | 4.068  | 3.641  | 1.00 | 0.00 | C |
| ATOM | 2133 | O    | PHE | 141 | -3.490  | 3.910  | 2.423  | 1.00 | 0.00 | O |
| ATOM | 2134 | CB   | PHE | 141 | -5.119  | 5.332  | 4.963  | 1.00 | 0.00 | C |
| ATOM | 2135 | CG   | PHE | 141 | -5.008  | 6.370  | 3.884  | 1.00 | 0.00 | C |
| ATOM | 2136 | CD1  | PHE | 141 | -5.649  | 6.196  | 2.666  | 1.00 | 0.00 | C |



|      |      |      |     |     |        |        |        |      |      |   |
|------|------|------|-----|-----|--------|--------|--------|------|------|---|
| ATOM | 2137 | CE1  | PHE | 141 | -5.545 | 7.149  | 1.672  | 1.00 | 0.00 | C |
| ATOM | 2138 | CZ   | PHE | 141 | -4.803 | 8.293  | 1.886  | 1.00 | 0.00 | C |
| ATOM | 2139 | CE2  | PHE | 141 | -4.160 | 8.480  | 3.094  | 1.00 | 0.00 | C |
| ATOM | 2140 | CD2  | PHE | 141 | -4.265 | 7.523  | 4.086  | 1.00 | 0.00 | C |
| ATOM | 2141 | H    | PHE | 141 | -4.355 | 3.526  | 6.580  | 1.00 | 0.00 | H |
| ATOM | 2142 | HA   | PHE | 141 | -5.436 | 3.469  | 3.961  | 1.00 | 0.00 | H |
| ATOM | 2143 | 2HB3 | PHE | 141 | -4.524 | 5.659  | 5.802  | 1.00 | 0.00 | H |
| ATOM | 2144 | 1HD  | PHE | 141 | -6.232 | 5.303  | 2.499  | 1.00 | 0.00 | H |
| ATOM | 2145 | 1HE  | PHE | 141 | -6.050 | 7.002  | 0.728  | 1.00 | 0.00 | H |
| ATOM | 2146 | HZ   | PHE | 141 | -4.721 | 9.038  | 1.109  | 1.00 | 0.00 | H |
| ATOM | 2147 | 2HE  | PHE | 141 | -3.577 | 9.373  | 3.265  | 1.00 | 0.00 | H |
| ATOM | 2148 | 2HD  | PHE | 141 | -3.761 | 7.669  | 5.032  | 1.00 | 0.00 | H |
| ATOM | 2149 | HB2  | PHE | 141 | -6.171 | 5.289  | 5.247  | 1.00 | 0.00 | H |
| ATOM | 2150 | N    | VAL | 142 | -2.274 | 4.353  | 4.263  | 1.00 | 0.00 | N |
| ATOM | 2151 | CA   | VAL | 142 | -1.020 | 4.500  | 3.533  | 1.00 | 0.00 | C |
| ATOM | 2152 | C    | VAL | 142 | -0.742 | 3.276  | 2.669  | 1.00 | 0.00 | C |
| ATOM | 2153 | O    | VAL | 142 | -0.452 | 3.398  | 1.478  | 1.00 | 0.00 | O |
| ATOM | 2154 | CB   | VAL | 142 | 0.166  | 4.718  | 4.493  | 1.00 | 0.00 | C |
| ATOM | 2155 | CG1  | VAL | 142 | 1.481  | 4.687  | 3.730  | 1.00 | 0.00 | C |
| ATOM | 2156 | CG2  | VAL | 142 | 0.007  | 6.029  | 5.247  | 1.00 | 0.00 | C |
| ATOM | 2157 | H    | VAL | 142 | -2.277 | 4.469  | 5.236  | 1.00 | 0.00 | H |
| ATOM | 2158 | HA   | VAL | 142 | -1.103 | 5.368  | 2.896  | 1.00 | 0.00 | H |
| ATOM | 2159 | HB   | VAL | 142 | 0.173  | 3.911  | 5.212  | 1.00 | 0.00 | H |
| ATOM | 2160 | 1HG1 | VAL | 142 | 1.604  | 3.721  | 3.265  | 1.00 | 0.00 | H |
| ATOM | 2161 | 2HG1 | VAL | 142 | 1.477  | 5.456  | 2.973  | 1.00 | 0.00 | H |
| ATOM | 2162 | 3HG1 | VAL | 142 | 2.298  | 4.861  | 4.415  | 1.00 | 0.00 | H |
| ATOM | 2163 | 1HG2 | VAL | 142 | 0.484  | 6.823  | 4.693  | 1.00 | 0.00 | H |
| ATOM | 2164 | 2HG2 | VAL | 142 | -1.044 | 6.253  | 5.364  | 1.00 | 0.00 | H |
| ATOM | 2165 | 3HG2 | VAL | 142 | 0.466  | 5.942  | 6.220  | 1.00 | 0.00 | H |
| ATOM | 2166 | N    | GLN | 143 | -0.834 | 2.097  | 3.274  | 1.00 | 0.00 | N |
| ATOM | 2167 | CA   | GLN | 143 | -0.591 | 0.850  | 2.558  | 1.00 | 0.00 | C |
| ATOM | 2168 | C    | GLN | 143 | -1.450 | 0.768  | 1.301  | 1.00 | 0.00 | C |
| ATOM | 2169 | O    | GLN | 143 | -0.945 | 0.507  | 0.209  | 1.00 | 0.00 | O |
| ATOM | 2170 | CB   | GLN | 143 | -0.881 | -0.348 | 3.466  | 1.00 | 0.00 | C |
| ATOM | 2171 | CG   | GLN | 143 | 0.016  | -0.413 | 4.691  | 1.00 | 0.00 | C |
| ATOM | 2172 | CD   | GLN | 143 | 1.482  | -0.567 | 4.335  | 1.00 | 0.00 | C |
| ATOM | 2173 | OE1  | GLN | 143 | 2.103  | 0.356  | 3.805  | 1.00 | 0.00 | O |
| ATOM | 2174 | NE2  | GLN | 143 | 2.042  | -1.734 | 4.624  | 1.00 | 0.00 | N |
| ATOM | 2175 | H    | GLN | 143 | -1.068 | 2.065  | 4.226  | 1.00 | 0.00 | H |
| ATOM | 2176 | HA   | GLN | 143 | 0.449  | 0.830  | 2.272  | 1.00 | 0.00 | H |
| ATOM | 2177 | 2HB3 | GLN | 143 | -0.743 | -1.256 | 2.898  | 1.00 | 0.00 | H |
| ATOM | 2178 | 2HG3 | GLN | 143 | -0.283 | -1.257 | 5.295  | 1.00 | 0.00 | H |
| ATOM | 2179 | 1HE2 | GLN | 143 | 1.487  | -2.423 | 5.045  | 1.00 | 0.00 | H |
| ATOM | 2180 | 2HE2 | GLN | 143 | 2.989  | -1.861 | 4.404  | 1.00 | 0.00 | H |
| ATOM | 2181 | HB2  | GLN | 143 | -1.903 | -0.286 | 3.837  | 1.00 | 0.00 | H |
| ATOM | 2182 | HG2  | GLN | 143 | -0.080 | 0.511  | 5.262  | 1.00 | 0.00 | H |
| ATOM | 2183 | N    | MET | 144 | -2.751 | 0.994  | 1.461  | 1.00 | 0.00 | N |
| ATOM | 2184 | CA   | MET | 144 | -3.678 | 0.947  | 0.338  | 1.00 | 0.00 | C |
| ATOM | 2185 | C    | MET | 144 | -3.170 | 1.796  | -0.823 | 1.00 | 0.00 | C |
| ATOM | 2186 | O    | MET | 144 | -3.088 | 1.327  | -1.958 | 1.00 | 0.00 | O |
| ATOM | 2187 | CB   | MET | 144 | -5.063 | 1.432  | 0.771  | 1.00 | 0.00 | C |
| ATOM | 2188 | CG   | MET | 144 | -6.022 | 1.648  | -0.387 | 1.00 | 0.00 | C |
| ATOM | 2189 | SD   | MET | 144 | -7.675 | 2.119  | 0.158  | 1.00 | 0.00 | S |
| ATOM | 2190 | CE   | MET | 144 | -7.409 | 3.835  | 0.600  | 1.00 | 0.00 | C |
| ATOM | 2191 | H    | MET | 144 | -3.094 | 1.197  | 2.357  | 1.00 | 0.00 | H |
| ATOM | 2192 | HA   | MET | 144 | -3.751 | -0.079 | 0.014  | 1.00 | 0.00 | H |
| ATOM | 2193 | 2HB3 | MET | 144 | -4.954 | 2.369  | 1.299  | 1.00 | 0.00 | H |
| ATOM | 2194 | 2HG3 | MET | 144 | -6.093 | 0.730  | -0.952 | 1.00 | 0.00 | H |
| ATOM | 2195 | 1HE  | MET | 144 | -7.710 | 3.994  | 1.625  | 1.00 | 0.00 | H |
| ATOM | 2196 | 2HE  | MET | 144 | -6.362 | 4.076  | 0.491  | 1.00 | 0.00 | H |
| ATOM | 2197 | 3HE  | MET | 144 | -7.995 | 4.469  | -0.049 | 1.00 | 0.00 | H |
| ATOM | 2198 | HB2  | MET | 144 | -5.525 | 0.686  | 1.416  | 1.00 | 0.00 | H |
| ATOM | 2199 | HG2  | MET | 144 | -5.653 | 2.454  | -1.019 | 1.00 | 0.00 | H |
| ATOM | 2200 | N    | MET | 145 | -2.828 | 3.048  | -0.531 | 1.00 | 0.00 | N |
| ATOM | 2201 | CA   | MET | 145 | -2.327 | 3.960  | -1.551 | 1.00 | 0.00 | C |
| ATOM | 2202 | C    | MET | 145 | -1.139 | 3.350  | -2.290 | 1.00 | 0.00 | C |
| ATOM | 2203 | O    | MET | 145 | -1.032 | 3.459  | -3.513 | 1.00 | 0.00 | O |
| ATOM | 2204 | CB   | MET | 145 | -1.919 | 5.292  | -0.917 | 1.00 | 0.00 | C |
| ATOM | 2205 | CG   | MET | 145 | -3.072 | 6.028  | -0.254 | 1.00 | 0.00 | C |
| ATOM | 2206 | SD   | MET | 145 | -4.402 | 6.420  | -1.407 | 1.00 | 0.00 | S |
| ATOM | 2207 | CE   | MET | 145 | -3.545 | 7.493  | -2.558 | 1.00 | 0.00 | C |
| ATOM | 2208 | H    | MET | 145 | -2.914 | 3.363  | 0.392  | 1.00 | 0.00 | H |
| ATOM | 2209 | HA   | MET | 145 | -3.123 | 4.136  | -2.258 | 1.00 | 0.00 | H |
| ATOM | 2210 | 2HB3 | MET | 145 | -1.508 | 5.931  | -1.685 | 1.00 | 0.00 | H |
| ATOM | 2211 | 2HG3 | MET | 145 | -2.697 | 6.947  | 0.169  | 1.00 | 0.00 | H |
| ATOM | 2212 | 1HE  | MET | 145 | -3.219 | 8.384  | -2.043 | 1.00 | 0.00 | H |
| ATOM | 2213 | 2HE  | MET | 145 | -2.689 | 6.975  | -2.963 | 1.00 | 0.00 | H |

|         |      |      |      |      |         |        |         |      |      |    |
|---------|------|------|------|------|---------|--------|---------|------|------|----|
| ATOM    | 2214 | 3HE  | MET  | 145  | -4.215  | 7.765  | -3.361  | 1.00 | 0.00 | H  |
| ATOM    | 2215 | HB2  | MET  | 145  | -1.176  | 5.112  | -0.140  | 1.00 | 0.00 | H  |
| ATOM    | 2216 | HG2  | MET  | 145  | -3.506  | 5.399  | 0.525   | 1.00 | 0.00 | H  |
| ATOM    | 2217 | N    | THR  | 146  | -0.247  | 2.711  | -1.541  | 1.00 | 0.00 | N  |
| ATOM    | 2218 | CA   | THR  | 146  | 0.933   | 2.084  | -2.125  | 1.00 | 0.00 | C  |
| ATOM    | 2219 | C    | THR  | 146  | 0.735   | 0.581  | -2.286  | 1.00 | 0.00 | C  |
| ATOM    | 2220 | O    | THR  | 146  | 1.653   | -0.205 | -2.049  | 1.00 | 0.00 | O  |
| ATOM    | 2221 | CB   | THR  | 146  | 2.186   | 2.335  | -1.264  | 1.00 | 0.00 | C  |
| ATOM    | 2222 | OG1  | THR  | 146  | 1.982   | 1.829  | 0.059   | 1.00 | 0.00 | O  |
| ATOM    | 2223 | CG2  | THR  | 146  | 2.507   | 3.822  | -1.199  | 1.00 | 0.00 | C  |
| ATOM    | 2224 | H    | THR  | 146  | -0.388  | 2.657  | -0.572  | 1.00 | 0.00 | H  |
| ATOM    | 2225 | HA   | THR  | 146  | 1.094   | 2.523  | -3.098  | 1.00 | 0.00 | H  |
| ATOM    | 2226 | HB   | THR  | 146  | 3.022   | 1.821  | -1.714  | 1.00 | 0.00 | H  |
| ATOM    | 2227 | 1HG  | THR  | 146  | 1.998   | 2.555  | 0.687   | 1.00 | 0.00 | H  |
| ATOM    | 2228 | 1HG2 | THR  | 146  | 2.910   | 4.062  | -0.225  | 1.00 | 0.00 | H  |
| ATOM    | 2229 | 2HG2 | THR  | 146  | 1.606   | 4.394  | -1.365  | 1.00 | 0.00 | H  |
| ATOM    | 2230 | 3HG2 | THR  | 146  | 3.234   | 4.066  | -1.959  | 1.00 | 0.00 | H  |
| ATOM    | 2231 | N    | ALA  | 147  | -0.466  | 0.187  | -2.693  | 1.00 | 0.00 | N  |
| ATOM    | 2232 | CA   | ALA  | 147  | -0.784  | -1.222 | -2.889  | 1.00 | 0.00 | C  |
| ATOM    | 2233 | C    | ALA  | 147  | -1.459  | -1.451 | -4.238  | 1.00 | 0.00 | C  |
| ATOM    | 2234 | O    | ALA  | 147  | -2.600  | -1.038 | -4.450  | 1.00 | 0.00 | O  |
| ATOM    | 2235 | CB   | ALA  | 147  | -1.670  | -1.726 | -1.762  | 1.00 | 0.00 | C  |
| ATOM    | 2236 | H    | ALA  | 147  | -1.158  | 0.861  | -2.867  | 1.00 | 0.00 | H  |
| ATOM    | 2237 | HA   | ALA  | 147  | 0.142   | -1.777 | -2.864  | 1.00 | 0.00 | H  |
| ATOM    | 2238 | 1HB  | ALA  | 147  | -2.543  | -2.204 | -2.176  | 1.00 | 0.00 | H  |
| ATOM    | 2239 | 2HB  | ALA  | 147  | -1.121  | -2.440 | -1.164  | 1.00 | 0.00 | H  |
| ATOM    | 2240 | 3HB  | ALA  | 147  | -1.973  | -0.895 | -1.143  | 1.00 | 0.00 | H  |
| ATOM    | 2241 | N    | LYS  | 148  | -0.748  | -2.108 | -5.147  | 1.00 | 0.00 | N  |
| ATOM    | 2242 | CA   | LYS  | 148  | -1.278  | -2.392 | -6.475  | 1.00 | 0.00 | C  |
| ATOM    | 2243 | C    | LYS  | 148  | -1.700  | -3.854 | -6.590  | 1.00 | 0.00 | C  |
| ATOM    | 2244 | O    | LYS  | 148  | -0.836  | -4.725 | -6.677  | 1.00 | 0.00 | O  |
| ATOM    | 2245 | CB   | LYS  | 148  | -0.235  | -2.066 | -7.545  | 1.00 | 0.00 | C  |
| ATOM    | 2246 | CG   | LYS  | 148  | 0.266   | -0.634 | -7.487  | 1.00 | 0.00 | C  |
| ATOM    | 2247 | CD   | LYS  | 148  | -0.830  | 0.356  | -7.842  | 1.00 | 0.00 | C  |
| ATOM    | 2248 | CE   | LYS  | 148  | -1.056  | 0.421  | -9.345  | 1.00 | 0.00 | C  |
| ATOM    | 2249 | NZ   | LYS  | 148  | 0.029   | 1.171  | -10.037 | 1.00 | 0.00 | N  |
| ATOM    | 2250 | H    | LYS  | 148  | 0.156   | -2.412 | -4.917  | 1.00 | 0.00 | H  |
| ATOM    | 2251 | HA   | LYS  | 148  | -2.145  | -1.767 | -6.626  | 1.00 | 0.00 | H  |
| ATOM    | 2252 | 2HB3 | LYS  | 148  | -0.670  | -2.234 | -8.520  | 1.00 | 0.00 | H  |
| ATOM    | 2253 | 2HG3 | LYS  | 148  | 1.082   | -0.519 | -8.186  | 1.00 | 0.00 | H  |
| ATOM    | 2254 | 2HD3 | LYS  | 148  | -0.549  | 1.338  | -7.486  | 1.00 | 0.00 | H  |
| ATOM    | 2255 | 2HE3 | LYS  | 148  | -1.998  | 0.915  | -9.533  | 1.00 | 0.00 | H  |
| ATOM    | 2256 | 1HZ  | LYS  | 148  | 0.272   | 0.703  | -10.934 | 1.00 | 0.00 | H  |
| ATOM    | 2257 | 2HZ  | LYS  | 148  | 0.877   | 1.205  | -9.436  | 1.00 | 0.00 | H  |
| ATOM    | 2258 | 3HZ  | LYS  | 148  | -0.279  | 2.144  | -10.238 | 1.00 | 0.00 | H  |
| ATOM    | 2259 | HB2  | LYS  | 148  | 0.641   | -2.699 | -7.404  | 1.00 | 0.00 | H  |
| ATOM    | 2260 | HG2  | LYS  | 148  | 0.610   | -0.408 | -6.476  | 1.00 | 0.00 | H  |
| ATOM    | 2261 | HD2  | LYS  | 148  | -1.765  | 0.045  | -7.378  | 1.00 | 0.00 | H  |
| ATOM    | 2262 | HE2  | LYS  | 148  | -1.074  | -0.589 | -9.755  | 1.00 | 0.00 | H  |
| ATOM    | 2263 | HXT  | LYS  | 148  | -2.744  | -4.128 | -6.596  | 1.00 | 0.00 | H  |
| TER     | 2264 |      | LYS  | 148  |         |        |         |      |      |    |
| HETATM  | 2265 | CA   | CA   | 149  | 26.033  | -5.982 | -2.893  | 1.00 | 0.00 | Ca |
| HETATM  | 2266 | CA   | CA   | 150  | 30.425  | 3.340  | -5.149  | 1.00 | 0.00 | Ca |
| HETATM  | 2267 | CA   | CA   | 151  | -12.834 | 7.964  | 11.921  | 1.00 | 0.00 | Ca |
| HETATM  | 2268 | CA   | CA   | 152  | -8.178  | -0.981 | 10.612  | 1.00 | 0.00 | Ca |
| HETATM  | 2269 | F1   | UNK  | 1    | 14.842  | 2.283  | 2.026   | 1.00 | 0.00 | F  |
| HETATM  | 2270 | C1   | UNK  | 1    | 15.284  | 3.539  | 2.110   | 1.00 | 0.00 | C  |
| HETATM  | 2271 | C2   | UNK  | 1    | 15.439  | 3.944  | 3.597   | 1.00 | 0.00 | C  |
| HETATM  | 2272 | O1   | UNK  | 1    | 15.540  | 5.361  | 3.780   | 1.00 | 0.00 | O  |
| HETATM  | 2273 | C3   | UNK  | 1    | 16.693  | 6.001  | 3.450   | 1.00 | 0.00 | C  |
| HETATM  | 2274 | F2   | UNK  | 1    | 17.568  | 5.963  | 4.485   | 1.00 | 0.00 | F  |
| HETATM  | 2275 | F3   | UNK  | 1    | 16.425  | 3.638  | 1.423   | 1.00 | 0.00 | F  |
| HETATM  | 2276 | F4   | UNK  | 1    | 14.371  | 4.324  | 1.534   | 1.00 | 0.00 | F  |
| HETATM  | 2277 | C4   | UNK  | 1    | 16.498  | 3.148  | 4.391   | 1.00 | 0.00 | C  |
| HETATM  | 2278 | F5   | UNK  | 1    | 16.186  | 1.854  | 4.403   | 1.00 | 0.00 | F  |
| HETATM  | 2279 | F6   | UNK  | 1    | 16.515  | 3.568  | 5.654   | 1.00 | 0.00 | F  |
| HETATM  | 2280 | F7   | UNK  | 1    | 17.720  | 3.283  | 3.871   | 1.00 | 0.00 | F  |
| HETATM  | 2281 | H1   | UNK  | 1    | 16.459  | 7.049  | 3.274   | 1.00 | 0.00 | H  |
| HETATM  | 2282 | H2   | UNK  | 1    | 17.168  | 5.559  | 2.573   | 1.00 | 0.00 | H  |
| HETATM  | 2283 | H3   | UNK  | 1    | 14.480  | 3.707  | 4.063   | 1.00 | 0.00 | H  |
| ENDMDL  |      |      |      |      |         |        |         |      |      |    |
| CONNECT | 2270 | 2269 | 2271 | 2275 | 2276    |        |         |      |      |    |
| CONNECT | 2271 | 2270 | 2272 | 2277 | 2283    |        |         |      |      |    |
| CONNECT | 2273 | 2272 | 2274 | 2281 | 2282    |        |         |      |      |    |
| CONNECT | 2277 | 2271 | 2278 | 2279 | 2280    |        |         |      |      |    |
| CONNECT | 2269 | 2270 |      |      |         |        |         |      |      |    |
| CONNECT | 2274 | 2273 |      |      |         |        |         |      |      |    |



|      |     |      |     |    |        |       |        |      |      |   |
|------|-----|------|-----|----|--------|-------|--------|------|------|---|
| ATOM | 68  | H    | THR | 5  | 31.807 | 9.286 | 13.936 | 1.00 | 0.00 | H |
| ATOM | 69  | HA   | THR | 5  | 33.641 | 7.364 | 12.850 | 1.00 | 0.00 | H |
| ATOM | 70  | HB   | THR | 5  | 34.076 | 7.140 | 15.495 | 1.00 | 0.00 | H |
| ATOM | 71  | 1HG  | THR | 5  | 33.583 | 9.093 | 16.507 | 1.00 | 0.00 | H |
| ATOM | 72  | 1HG2 | THR | 5  | 35.488 | 9.355 | 15.121 | 1.00 | 0.00 | H |
| ATOM | 73  | 2HG2 | THR | 5  | 34.999 | 9.090 | 13.447 | 1.00 | 0.00 | H |
| ATOM | 74  | 3HG2 | THR | 5  | 35.902 | 7.846 | 14.310 | 1.00 | 0.00 | H |
| ATOM | 75  | N    | GLU | 6  | 33.049 | 5.271 | 14.530 | 1.00 | 0.00 | N |
| ATOM | 76  | CA   | GLU | 6  | 32.494 | 3.979 | 14.915 | 1.00 | 0.00 | C |
| ATOM | 77  | C    | GLU | 6  | 31.081 | 4.138 | 15.473 | 1.00 | 0.00 | C |
| ATOM | 78  | O    | GLU | 6  | 30.216 | 3.292 | 15.247 | 1.00 | 0.00 | O |
| ATOM | 79  | CB   | GLU | 6  | 33.389 | 3.305 | 15.955 | 1.00 | 0.00 | C |
| ATOM | 80  | CG   | GLU | 6  | 34.713 | 2.813 | 15.392 | 1.00 | 0.00 | C |
| ATOM | 81  | CD   | GLU | 6  | 34.533 | 1.741 | 14.335 | 1.00 | 0.00 | C |
| ATOM | 82  | OE1  | GLU | 6  | 33.746 | 0.800 | 14.570 | 1.00 | 0.00 | O |
| ATOM | 83  | OE2  | GLU | 6  | 35.180 | 1.844 | 13.272 | 1.00 | 0.00 | O |
| ATOM | 84  | H    | GLU | 6  | 34.013 | 5.424 | 14.622 | 1.00 | 0.00 | H |
| ATOM | 85  | HA   | GLU | 6  | 32.452 | 3.360 | 14.033 | 1.00 | 0.00 | H |
| ATOM | 86  | 2HB3 | GLU | 6  | 32.862 | 2.457 | 16.371 | 1.00 | 0.00 | H |
| ATOM | 87  | 2HG3 | GLU | 6  | 35.304 | 2.405 | 16.200 | 1.00 | 0.00 | H |
| ATOM | 88  | HB2  | GLU | 6  | 33.638 | 4.018 | 16.741 | 1.00 | 0.00 | H |
| ATOM | 89  | HG2  | GLU | 6  | 35.239 | 3.642 | 14.921 | 1.00 | 0.00 | H |
| ATOM | 90  | N    | GLU | 7  | 30.858 | 5.228 | 16.199 | 1.00 | 0.00 | N |
| ATOM | 91  | CA   | GLU | 7  | 29.551 | 5.497 | 16.788 | 1.00 | 0.00 | C |
| ATOM | 92  | C    | GLU | 7  | 28.459 | 5.474 | 15.723 | 1.00 | 0.00 | C |
| ATOM | 93  | O    | GLU | 7  | 27.475 | 4.744 | 15.846 | 1.00 | 0.00 | O |
| ATOM | 94  | CB   | GLU | 7  | 29.558 | 6.855 | 17.498 | 1.00 | 0.00 | C |
| ATOM | 95  | CG   | GLU | 7  | 30.559 | 7.840 | 16.921 | 1.00 | 0.00 | C |
| ATOM | 96  | CD   | GLU | 7  | 31.905 | 7.777 | 17.619 | 1.00 | 0.00 | C |
| ATOM | 97  | OE1  | GLU | 7  | 32.722 | 6.906 | 17.255 | 1.00 | 0.00 | O |
| ATOM | 98  | OE2  | GLU | 7  | 32.139 | 8.600 | 18.528 | 1.00 | 0.00 | O |
| ATOM | 99  | H    | GLU | 7  | 31.588 | 5.868 | 16.343 | 1.00 | 0.00 | H |
| ATOM | 100 | HA   | GLU | 7  | 29.347 | 4.723 | 17.512 | 1.00 | 0.00 | H |
| ATOM | 101 | 2HB3 | GLU | 7  | 29.795 | 6.699 | 18.540 | 1.00 | 0.00 | H |
| ATOM | 102 | 2HG3 | GLU | 7  | 30.164 | 8.839 | 17.022 | 1.00 | 0.00 | H |
| ATOM | 103 | HB2  | GLU | 7  | 28.578 | 7.324 | 17.396 | 1.00 | 0.00 | H |
| ATOM | 104 | HG2  | GLU | 7  | 30.733 | 7.609 | 15.871 | 1.00 | 0.00 | H |
| ATOM | 105 | N    | GLN | 8  | 28.639 | 6.276 | 14.680 | 1.00 | 0.00 | N |
| ATOM | 106 | CA   | GLN | 8  | 27.668 | 6.349 | 13.595 | 1.00 | 0.00 | C |
| ATOM | 107 | C    | GLN | 8  | 27.826 | 5.165 | 12.644 | 1.00 | 0.00 | C |
| ATOM | 108 | O    | GLN | 8  | 26.844 | 4.525 | 12.268 | 1.00 | 0.00 | O |
| ATOM | 109 | CB   | GLN | 8  | 27.828 | 7.662 | 12.823 | 1.00 | 0.00 | C |
| ATOM | 110 | CG   | GLN | 8  | 27.441 | 8.891 | 13.630 | 1.00 | 0.00 | C |
| ATOM | 111 | CD   | GLN | 8  | 25.957 | 8.949 | 13.931 | 1.00 | 0.00 | C |
| ATOM | 112 | OE1  | GLN | 8  | 25.180 | 9.527 | 13.170 | 1.00 | 0.00 | O |
| ATOM | 113 | NE2  | GLN | 8  | 25.554 | 8.348 | 15.045 | 1.00 | 0.00 | N |
| ATOM | 114 | H    | GLN | 8  | 29.443 | 6.834 | 14.639 | 1.00 | 0.00 | H |
| ATOM | 115 | HA   | GLN | 8  | 26.681 | 6.316 | 14.031 | 1.00 | 0.00 | H |
| ATOM | 116 | 2HB3 | GLN | 8  | 27.205 | 7.626 | 11.942 | 1.00 | 0.00 | H |
| ATOM | 117 | 2HG3 | GLN | 8  | 27.716 | 9.773 | 13.071 | 1.00 | 0.00 | H |
| ATOM | 118 | 1HE2 | GLN | 8  | 26.229 | 7.909 | 15.603 | 1.00 | 0.00 | H |
| ATOM | 119 | 2HE2 | GLN | 8  | 24.600 | 8.371 | 15.265 | 1.00 | 0.00 | H |
| ATOM | 120 | HB2  | GLN | 8  | 28.873 | 7.796 | 12.544 | 1.00 | 0.00 | H |
| ATOM | 121 | HG2  | GLN | 8  | 27.960 | 8.874 | 14.590 | 1.00 | 0.00 | H |
| ATOM | 122 | N    | ILE | 9  | 29.065 | 4.884 | 12.259 | 1.00 | 0.00 | N |
| ATOM | 123 | CA   | ILE | 9  | 29.350 | 3.778 | 11.352 | 1.00 | 0.00 | C |
| ATOM | 124 | C    | ILE | 9  | 28.551 | 2.536 | 11.734 | 1.00 | 0.00 | C |
| ATOM | 125 | O    | ILE | 9  | 28.002 | 1.850 | 10.871 | 1.00 | 0.00 | O |
| ATOM | 126 | CB   | ILE | 9  | 30.850 | 3.427 | 11.347 | 1.00 | 0.00 | C |
| ATOM | 127 | CG2  | ILE | 9  | 31.110 | 2.230 | 10.445 | 1.00 | 0.00 | C |
| ATOM | 128 | CG1  | ILE | 9  | 31.676 | 4.634 | 10.894 | 1.00 | 0.00 | C |
| ATOM | 129 | CD1  | ILE | 9  | 33.165 | 4.449 | 11.081 | 1.00 | 0.00 | C |
| ATOM | 130 | H    | ILE | 9  | 29.806 | 5.432 | 12.591 | 1.00 | 0.00 | H |
| ATOM | 131 | HA   | ILE | 9  | 29.068 | 4.083 | 10.357 | 1.00 | 0.00 | H |
| ATOM | 132 | HB   | ILE | 9  | 31.138 | 3.159 | 12.352 | 1.00 | 0.00 | H |
| ATOM | 133 | 1HG2 | ILE | 9  | 32.036 | 1.759 | 10.733 | 1.00 | 0.00 | H |
| ATOM | 134 | 2HG2 | ILE | 9  | 30.301 | 1.524 | 10.542 | 1.00 | 0.00 | H |
| ATOM | 135 | 3HG2 | ILE | 9  | 31.178 | 2.562 | 9.419  | 1.00 | 0.00 | H |
| ATOM | 136 | 2HG3 | ILE | 9  | 31.374 | 5.502 | 11.464 | 1.00 | 0.00 | H |
| ATOM | 137 | 1HD1 | ILE | 9  | 33.680 | 5.356 | 10.797 | 1.00 | 0.00 | H |
| ATOM | 138 | 2HD1 | ILE | 9  | 33.375 | 4.224 | 12.116 | 1.00 | 0.00 | H |
| ATOM | 139 | 3HD1 | ILE | 9  | 33.508 | 3.634 | 10.460 | 1.00 | 0.00 | H |
| ATOM | 140 | HG2  | ILE | 9  | 31.508 | 4.811 | 9.832  | 1.00 | 0.00 | H |
| ATOM | 141 | N    | ALA | 10 | 28.489 | 2.254 | 13.031 | 1.00 | 0.00 | N |
| ATOM | 142 | CA   | ALA | 10 | 27.752 | 1.097 | 13.527 | 1.00 | 0.00 | C |
| ATOM | 143 | C    | ALA | 10 | 26.266 | 1.211 | 13.201 | 1.00 | 0.00 | C |
| ATOM | 144 | O    | ALA | 10 | 25.641 | 0.242 | 12.774 | 1.00 | 0.00 | O |

|      |     |      |     |    |        |        |        |      |      |   |
|------|-----|------|-----|----|--------|--------|--------|------|------|---|
| ATOM | 145 | CB   | ALA | 10 | 27.957 | 0.946  | 15.027 | 1.00 | 0.00 | C |
| ATOM | 146 | H    | ALA | 10 | 28.947 | 2.839  | 13.670 | 1.00 | 0.00 | H |
| ATOM | 147 | HA   | ALA | 10 | 28.150 | 0.216  | 13.043 | 1.00 | 0.00 | H |
| ATOM | 148 | 1HB  | ALA | 10 | 28.589 | 1.745  | 15.385 | 1.00 | 0.00 | H |
| ATOM | 149 | 2HB  | ALA | 10 | 27.000 | 0.989  | 15.526 | 1.00 | 0.00 | H |
| ATOM | 150 | 3HB  | ALA | 10 | 28.425 | -0.005 | 15.230 | 1.00 | 0.00 | H |
| ATOM | 151 | N    | GLU | 11 | 25.712 | 2.400  | 13.406 | 1.00 | 0.00 | N |
| ATOM | 152 | CA   | GLU | 11 | 24.298 | 2.639  | 13.134 | 1.00 | 0.00 | C |
| ATOM | 153 | C    | GLU | 11 | 23.996 | 2.487  | 11.649 | 1.00 | 0.00 | C |
| ATOM | 154 | O    | GLU | 11 | 23.146 | 1.687  | 11.253 | 1.00 | 0.00 | O |
| ATOM | 155 | CB   | GLU | 11 | 23.893 | 4.037  | 13.609 | 1.00 | 0.00 | C |
| ATOM | 156 | CG   | GLU | 11 | 23.565 | 4.105  | 15.091 | 1.00 | 0.00 | C |
| ATOM | 157 | CD   | GLU | 11 | 22.191 | 3.550  | 15.410 | 1.00 | 0.00 | C |
| ATOM | 158 | OE1  | GLU | 11 | 22.081 | 2.325  | 15.625 | 1.00 | 0.00 | O |
| ATOM | 159 | OE2  | GLU | 11 | 21.224 | 4.340  | 15.445 | 1.00 | 0.00 | O |
| ATOM | 160 | H    | GLU | 11 | 26.264 | 3.136  | 13.746 | 1.00 | 0.00 | H |
| ATOM | 161 | HA   | GLU | 11 | 23.727 | 1.905  | 13.683 | 1.00 | 0.00 | H |
| ATOM | 162 | 2HB3 | GLU | 11 | 23.023 | 4.353  | 13.054 | 1.00 | 0.00 | H |
| ATOM | 163 | 2HG3 | GLU | 11 | 23.601 | 5.137  | 15.408 | 1.00 | 0.00 | H |
| ATOM | 164 | HB2  | GLU | 11 | 24.720 | 4.728  | 13.449 | 1.00 | 0.00 | H |
| ATOM | 165 | HG2  | GLU | 11 | 24.290 | 3.515  | 15.653 | 1.00 | 0.00 | H |
| ATOM | 166 | N    | PHE | 12 | 24.697 | 3.262  | 10.826 | 1.00 | 0.00 | N |
| ATOM | 167 | CA   | PHE | 12 | 24.502 | 3.214  | 9.381  | 1.00 | 0.00 | C |
| ATOM | 168 | C    | PHE | 12 | 24.769 | 1.812  | 8.841  | 1.00 | 0.00 | C |
| ATOM | 169 | O    | PHE | 12 | 24.205 | 1.409  | 7.823  | 1.00 | 0.00 | O |
| ATOM | 170 | CB   | PHE | 12 | 25.422 | 4.222  | 8.689  | 1.00 | 0.00 | C |
| ATOM | 171 | CG   | PHE | 12 | 24.916 | 5.634  | 8.748  | 1.00 | 0.00 | C |
| ATOM | 172 | CD1  | PHE | 12 | 24.084 | 6.129  | 7.756  | 1.00 | 0.00 | C |
| ATOM | 173 | CE1  | PHE | 12 | 23.619 | 7.431  | 7.808  | 1.00 | 0.00 | C |
| ATOM | 174 | CZ   | PHE | 12 | 23.980 | 8.251  | 8.859  | 1.00 | 0.00 | C |
| ATOM | 175 | CE2  | PHE | 12 | 24.807 | 7.770  | 9.853  | 1.00 | 0.00 | C |
| ATOM | 176 | CD2  | PHE | 12 | 25.272 | 6.470  | 9.796  | 1.00 | 0.00 | C |
| ATOM | 177 | H    | PHE | 12 | 25.359 | 3.880  | 11.200 | 1.00 | 0.00 | H |
| ATOM | 178 | HA   | PHE | 12 | 23.477 | 3.477  | 9.177  | 1.00 | 0.00 | H |
| ATOM | 179 | 2HB3 | PHE | 12 | 25.527 | 3.949  | 7.650  | 1.00 | 0.00 | H |
| ATOM | 180 | 1HD  | PHE | 12 | 23.802 | 5.489  | 6.934  | 1.00 | 0.00 | H |
| ATOM | 181 | 1HE  | PHE | 12 | 22.972 | 7.803  | 7.029  | 1.00 | 0.00 | H |
| ATOM | 182 | HZ   | PHE | 12 | 23.617 | 9.267  | 8.901  | 1.00 | 0.00 | H |
| ATOM | 183 | 2HE  | PHE | 12 | 25.091 | 8.409  | 10.677 | 1.00 | 0.00 | H |
| ATOM | 184 | 2HD  | PHE | 12 | 25.919 | 6.093  | 10.576 | 1.00 | 0.00 | H |
| ATOM | 185 | HB2  | PHE | 12 | 26.398 | 4.219  | 9.177  | 1.00 | 0.00 | H |
| ATOM | 186 | N    | LYS | 13 | 25.629 | 1.072  | 9.531  | 1.00 | 0.00 | N |
| ATOM | 187 | CA   | LYS | 13 | 25.972 | -0.285 | 9.124  | 1.00 | 0.00 | C |
| ATOM | 188 | C    | LYS | 13 | 24.713 | -1.113 | 8.879  | 1.00 | 0.00 | C |
| ATOM | 189 | O    | LYS | 13 | 24.532 | -1.677 | 7.801  | 1.00 | 0.00 | O |
| ATOM | 190 | CB   | LYS | 13 | 26.836 | -0.957 | 10.193 | 1.00 | 0.00 | C |
| ATOM | 191 | CG   | LYS | 13 | 27.469 | -2.259 | 9.732  | 1.00 | 0.00 | C |
| ATOM | 192 | CD   | LYS | 13 | 28.691 | -2.611 | 10.565 | 1.00 | 0.00 | C |
| ATOM | 193 | CE   | LYS | 13 | 28.300 | -3.265 | 11.879 | 1.00 | 0.00 | C |
| ATOM | 194 | NZ   | LYS | 13 | 29.479 | -3.469 | 12.768 | 1.00 | 0.00 | N |
| ATOM | 195 | H    | LYS | 13 | 26.046 | 1.450  | 10.337 | 1.00 | 0.00 | H |
| ATOM | 196 | HA   | LYS | 13 | 26.531 | -0.225 | 8.206  | 1.00 | 0.00 | H |
| ATOM | 197 | 2HB3 | LYS | 13 | 26.222 | -1.165 | 11.058 | 1.00 | 0.00 | H |
| ATOM | 198 | 2HG3 | LYS | 13 | 27.764 | -2.160 | 8.699  | 1.00 | 0.00 | H |
| ATOM | 199 | 2HD3 | LYS | 13 | 29.245 | -1.705 | 10.773 | 1.00 | 0.00 | H |
| ATOM | 200 | 2HE3 | LYS | 13 | 27.849 | -4.224 | 11.670 | 1.00 | 0.00 | H |
| ATOM | 201 | 1HZ  | LYS | 13 | 30.134 | -2.666 | 12.683 | 1.00 | 0.00 | H |
| ATOM | 202 | 2HZ  | LYS | 13 | 29.980 | -4.341 | 12.503 | 1.00 | 0.00 | H |
| ATOM | 203 | 3HZ  | LYS | 13 | 29.170 | -3.548 | 13.758 | 1.00 | 0.00 | H |
| ATOM | 204 | HB2  | LYS | 13 | 27.660 | -0.297 | 10.462 | 1.00 | 0.00 | H |
| ATOM | 205 | HG2  | LYS | 13 | 26.748 | -3.070 | 9.837  | 1.00 | 0.00 | H |
| ATOM | 206 | HD2  | LYS | 13 | 29.318 | -3.312 | 10.013 | 1.00 | 0.00 | H |
| ATOM | 207 | HE2  | LYS | 13 | 27.595 | -2.626 | 12.409 | 1.00 | 0.00 | H |
| ATOM | 208 | N    | GLU | 14 | 23.849 | -1.178 | 9.888  | 1.00 | 0.00 | N |
| ATOM | 209 | CA   | GLU | 14 | 22.607 | -1.936 | 9.778  | 1.00 | 0.00 | C |
| ATOM | 210 | C    | GLU | 14 | 21.827 | -1.530 | 8.532  | 1.00 | 0.00 | C |
| ATOM | 211 | O    | GLU | 14 | 21.323 | -2.379 | 7.797  | 1.00 | 0.00 | O |
| ATOM | 212 | CB   | GLU | 14 | 21.743 | -1.724 | 11.025 | 1.00 | 0.00 | C |
| ATOM | 213 | CG   | GLU | 14 | 22.437 | -2.110 | 12.320 | 1.00 | 0.00 | C |
| ATOM | 214 | CD   | GLU | 14 | 22.870 | -3.563 | 12.339 | 1.00 | 0.00 | C |
| ATOM | 215 | OE1  | GLU | 14 | 22.041 | -4.433 | 11.995 | 1.00 | 0.00 | O |
| ATOM | 216 | OE2  | GLU | 14 | 24.035 | -3.830 | 12.696 | 1.00 | 0.00 | O |
| ATOM | 217 | H    | GLU | 14 | 24.048 | -0.705 | 10.722 | 1.00 | 0.00 | H |
| ATOM | 218 | HA   | GLU | 14 | 22.862 | -2.983 | 9.704  | 1.00 | 0.00 | H |
| ATOM | 219 | 2HB3 | GLU | 14 | 20.847 | -2.318 | 10.931 | 1.00 | 0.00 | H |
| ATOM | 220 | 2HG3 | GLU | 14 | 21.757 | -1.941 | 13.143 | 1.00 | 0.00 | H |
| ATOM | 221 | HB2  | GLU | 14 | 21.490 | -0.667 | 11.117 | 1.00 | 0.00 | H |

|      |     |      |     |    |        |        |        |      |      |   |
|------|-----|------|-----|----|--------|--------|--------|------|------|---|
| ATOM | 222 | HG2  | GLU | 14 | 23.336 | -1.505 | 12.445 | 1.00 | 0.00 | H |
| ATOM | 223 | N    | ALA | 15 | 21.734 | -0.224 | 8.299  | 1.00 | 0.00 | N |
| ATOM | 224 | CA   | ALA | 15 | 21.018 | 0.296  | 7.140  | 1.00 | 0.00 | C |
| ATOM | 225 | C    | ALA | 15 | 21.733 | -0.070 | 5.843  | 1.00 | 0.00 | C |
| ATOM | 226 | O    | ALA | 15 | 21.164 | 0.037  | 4.757  | 1.00 | 0.00 | O |
| ATOM | 227 | CB   | ALA | 15 | 20.861 | 1.804  | 7.249  | 1.00 | 0.00 | C |
| ATOM | 228 | H    | ALA | 15 | 22.158 | 0.404  | 8.918  | 1.00 | 0.00 | H |
| ATOM | 229 | HA   | ALA | 15 | 20.032 | -0.146 | 7.131  | 1.00 | 0.00 | H |
| ATOM | 230 | 1HB  | ALA | 15 | 20.356 | 2.178  | 6.370  | 1.00 | 0.00 | H |
| ATOM | 231 | 2HB  | ALA | 15 | 20.281 | 2.042  | 8.128  | 1.00 | 0.00 | H |
| ATOM | 232 | 3HB  | ALA | 15 | 21.837 | 2.262  | 7.326  | 1.00 | 0.00 | H |
| ATOM | 233 | N    | PHE | 16 | 22.983 | -0.505 | 5.964  | 1.00 | 0.00 | N |
| ATOM | 234 | CA   | PHE | 16 | 23.777 | -0.886 | 4.801  | 1.00 | 0.00 | C |
| ATOM | 235 | C    | PHE | 16 | 23.979 | -2.397 | 4.752  | 1.00 | 0.00 | C |
| ATOM | 236 | O    | PHE | 16 | 24.518 | -2.932 | 3.782  | 1.00 | 0.00 | O |
| ATOM | 237 | CB   | PHE | 16 | 25.134 | -0.180 | 4.829  | 1.00 | 0.00 | C |
| ATOM | 238 | CG   | PHE | 16 | 25.998 | -0.492 | 3.641  | 1.00 | 0.00 | C |
| ATOM | 239 | CD1  | PHE | 16 | 25.835 | 0.199  | 2.450  | 1.00 | 0.00 | C |
| ATOM | 240 | CE1  | PHE | 16 | 26.628 | -0.089 | 1.354  | 1.00 | 0.00 | C |
| ATOM | 241 | CZ   | PHE | 16 | 27.595 | -1.072 | 1.443  | 1.00 | 0.00 | C |
| ATOM | 242 | CE2  | PHE | 16 | 27.767 | -1.765 | 2.623  | 1.00 | 0.00 | C |
| ATOM | 243 | CD2  | PHE | 16 | 26.971 | -1.475 | 3.716  | 1.00 | 0.00 | C |
| ATOM | 244 | H    | PHE | 16 | 23.382 | -0.570 | 6.858  | 1.00 | 0.00 | H |
| ATOM | 245 | HA   | PHE | 16 | 23.238 | -0.577 | 3.919  | 1.00 | 0.00 | H |
| ATOM | 246 | 2HB3 | PHE | 16 | 25.669 | -0.477 | 5.718  | 1.00 | 0.00 | H |
| ATOM | 247 | 1HD  | PHE | 16 | 25.080 | 0.967  | 2.381  | 1.00 | 0.00 | H |
| ATOM | 248 | 1HE  | PHE | 16 | 26.494 | 0.454  | 0.431  | 1.00 | 0.00 | H |
| ATOM | 249 | HZ   | PHE | 16 | 28.217 | -1.297 | 0.587  | 1.00 | 0.00 | H |
| ATOM | 250 | 2HE  | PHE | 16 | 28.522 | -2.534 | 2.695  | 1.00 | 0.00 | H |
| ATOM | 251 | 2HD  | PHE | 16 | 27.105 | -2.018 | 4.639  | 1.00 | 0.00 | H |
| ATOM | 252 | HB2  | PHE | 16 | 24.982 | 0.901  | 4.828  | 1.00 | 0.00 | H |
| ATOM | 253 | N    | SER | 17 | 23.545 | -3.081 | 5.806  | 1.00 | 0.00 | N |
| ATOM | 254 | CA   | SER | 17 | 23.683 | -4.530 | 5.887  | 1.00 | 0.00 | C |
| ATOM | 255 | C    | SER | 17 | 22.461 | -5.225 | 5.294  | 1.00 | 0.00 | C |
| ATOM | 256 | O    | SER | 17 | 22.563 | -6.321 | 4.742  | 1.00 | 0.00 | O |
| ATOM | 257 | CB   | SER | 17 | 23.878 | -4.966 | 7.342  | 1.00 | 0.00 | C |
| ATOM | 258 | OG   | SER | 17 | 25.252 | -4.993 | 7.687  | 1.00 | 0.00 | O |
| ATOM | 259 | H    | SER | 17 | 23.127 | -2.598 | 6.551  | 1.00 | 0.00 | H |
| ATOM | 260 | HA   | SER | 17 | 24.555 | -4.813 | 5.317  | 1.00 | 0.00 | H |
| ATOM | 261 | 2HB3 | SER | 17 | 23.466 | -5.954 | 7.476  | 1.00 | 0.00 | H |
| ATOM | 262 | HG   | SER | 17 | 25.673 | -5.748 | 7.266  | 1.00 | 0.00 | H |
| ATOM | 263 | HB2  | SER | 17 | 23.369 | -4.265 | 8.003  | 1.00 | 0.00 | H |
| ATOM | 264 | N    | LEU | 18 | 21.308 | -4.582 | 5.415  | 1.00 | 0.00 | N |
| ATOM | 265 | CA   | LEU | 18 | 20.063 | -5.136 | 4.891  | 1.00 | 0.00 | C |
| ATOM | 266 | C    | LEU | 18 | 20.015 | -5.030 | 3.371  | 1.00 | 0.00 | C |
| ATOM | 267 | O    | LEU | 18 | 19.550 | -5.943 | 2.688  | 1.00 | 0.00 | O |
| ATOM | 268 | CB   | LEU | 18 | 18.861 | -4.412 | 5.504  | 1.00 | 0.00 | C |
| ATOM | 269 | CG   | LEU | 18 | 18.397 | -3.150 | 4.774  | 1.00 | 0.00 | C |
| ATOM | 270 | CD1  | LEU | 18 | 16.920 | -2.894 | 5.038  | 1.00 | 0.00 | C |
| ATOM | 271 | CD2  | LEU | 18 | 19.232 | -1.950 | 5.193  | 1.00 | 0.00 | C |
| ATOM | 272 | H    | LEU | 18 | 21.288 | -3.712 | 5.867  | 1.00 | 0.00 | H |
| ATOM | 273 | HA   | LEU | 18 | 20.024 | -6.179 | 5.170  | 1.00 | 0.00 | H |
| ATOM | 274 | 2HB3 | LEU | 18 | 19.123 | -4.130 | 6.513  | 1.00 | 0.00 | H |
| ATOM | 275 | HG   | LEU | 18 | 18.523 | -3.290 | 3.708  | 1.00 | 0.00 | H |
| ATOM | 276 | 1HD1 | LEU | 18 | 16.785 | -2.610 | 6.072  | 1.00 | 0.00 | H |
| ATOM | 277 | 2HD1 | LEU | 18 | 16.356 | -3.792 | 4.835  | 1.00 | 0.00 | H |
| ATOM | 278 | 3HD1 | LEU | 18 | 16.573 | -2.099 | 4.397  | 1.00 | 0.00 | H |
| ATOM | 279 | 1HD2 | LEU | 18 | 18.647 | -1.049 | 5.086  | 1.00 | 0.00 | H |
| ATOM | 280 | 2HD2 | LEU | 18 | 20.108 | -1.887 | 4.566  | 1.00 | 0.00 | H |
| ATOM | 281 | 3HD2 | LEU | 18 | 19.534 | -2.066 | 6.223  | 1.00 | 0.00 | H |
| ATOM | 282 | HB2  | LEU | 18 | 17.994 | -5.071 | 5.494  | 1.00 | 0.00 | H |
| ATOM | 283 | N    | PHE | 19 | 20.502 | -3.911 | 2.846  | 1.00 | 0.00 | N |
| ATOM | 284 | CA   | PHE | 19 | 20.520 | -3.685 | 1.407  | 1.00 | 0.00 | C |
| ATOM | 285 | C    | PHE | 19 | 21.480 | -4.648 | 0.715  | 1.00 | 0.00 | C |
| ATOM | 286 | O    | PHE | 19 | 21.138 | -5.268 | -0.291 | 1.00 | 0.00 | O |
| ATOM | 287 | CB   | PHE | 19 | 20.919 | -2.240 | 1.098  | 1.00 | 0.00 | C |
| ATOM | 288 | CG   | PHE | 19 | 19.747 | -1.308 | 0.982  | 1.00 | 0.00 | C |
| ATOM | 289 | CD1  | PHE | 19 | 18.912 | -1.356 | -0.125 | 1.00 | 0.00 | C |
| ATOM | 290 | CE1  | PHE | 19 | 17.835 | -0.498 | -0.235 | 1.00 | 0.00 | C |
| ATOM | 291 | CZ   | PHE | 19 | 17.579 | 0.420  | 0.765  | 1.00 | 0.00 | C |
| ATOM | 292 | CE2  | PHE | 19 | 18.401 | 0.476  | 1.873  | 1.00 | 0.00 | C |
| ATOM | 293 | CD2  | PHE | 19 | 19.479 | -0.383 | 1.977  | 1.00 | 0.00 | C |
| ATOM | 294 | H    | PHE | 19 | 20.861 | -3.219 | 3.442  | 1.00 | 0.00 | H |
| ATOM | 295 | HA   | PHE | 19 | 19.523 | -3.862 | 1.033  | 1.00 | 0.00 | H |
| ATOM | 296 | 2HB3 | PHE | 19 | 21.459 | -2.215 | 0.165  | 1.00 | 0.00 | H |
| ATOM | 297 | 1HD  | PHE | 19 | 19.113 | -2.075 | -0.908 | 1.00 | 0.00 | H |
| ATOM | 298 | 1HE  | PHE | 19 | 17.195 | -0.547 | -1.103 | 1.00 | 0.00 | H |

|      |     |      |     |    |        |         |        |      |      |   |
|------|-----|------|-----|----|--------|---------|--------|------|------|---|
| ATOM | 299 | HZ   | PHE | 19 | 16.736 | 1.088   | 0.681  | 1.00 | 0.00 | H |
| ATOM | 300 | 2HE  | PHE | 19 | 18.204 | 1.194   | 2.654  | 1.00 | 0.00 | H |
| ATOM | 301 | 2HD  | PHE | 19 | 20.121 | -0.335  | 2.844  | 1.00 | 0.00 | H |
| ATOM | 302 | HB2  | PHE | 19 | 21.545 | -1.857  | 1.903  | 1.00 | 0.00 | H |
| ATOM | 303 | N    | ASP | 20 | 22.684 | -4.768  | 1.264  | 1.00 | 0.00 | N |
| ATOM | 304 | CA   | ASP | 20 | 23.696 | -5.655  | 0.701  | 1.00 | 0.00 | C |
| ATOM | 305 | C    | ASP | 20 | 23.301 | -7.116  | 0.887  | 1.00 | 0.00 | C |
| ATOM | 306 | O    | ASP | 20 | 23.649 | -7.744  | 1.887  | 1.00 | 0.00 | O |
| ATOM | 307 | CB   | ASP | 20 | 25.053 | -5.393  | 1.355  | 1.00 | 0.00 | C |
| ATOM | 308 | CG   | ASP | 20 | 26.103 | -6.403  | 0.936  | 1.00 | 0.00 | C |
| ATOM | 309 | OD1  | ASP | 20 | 26.170 | -6.723  | -0.269 | 1.00 | 0.00 | O |
| ATOM | 310 | OD2  | ASP | 20 | 26.856 | -6.877  | 1.812  | 1.00 | 0.00 | O |
| ATOM | 311 | H    | ASP | 20 | 22.897 | -4.248  | 2.067  | 1.00 | 0.00 | H |
| ATOM | 312 | HA   | ASP | 20 | 23.769 | -5.445  | -0.354 | 1.00 | 0.00 | H |
| ATOM | 313 | 2HB3 | ASP | 20 | 24.943 | -5.439  | 2.429  | 1.00 | 0.00 | H |
| ATOM | 314 | HB2  | ASP | 20 | 25.415 | -4.408  | 1.061  | 1.00 | 0.00 | H |
| ATOM | 315 | N    | LYS | 21 | 22.570 | -7.654  | -0.084 | 1.00 | 0.00 | N |
| ATOM | 316 | CA   | LYS | 21 | 22.126 | -9.041  | -0.029 | 1.00 | 0.00 | C |
| ATOM | 317 | C    | LYS | 21 | 23.275 | -9.994  | -0.351 | 1.00 | 0.00 | C |
| ATOM | 318 | O    | LYS | 21 | 23.421 | -11.041 | 0.278  | 1.00 | 0.00 | O |
| ATOM | 319 | CB   | LYS | 21 | 20.972 | -9.268  | -1.006 | 1.00 | 0.00 | C |
| ATOM | 320 | CG   | LYS | 21 | 19.790 | -8.339  | -0.782 | 1.00 | 0.00 | C |
| ATOM | 321 | CD   | LYS | 21 | 19.080 | -8.649  | 0.525  | 1.00 | 0.00 | C |
| ATOM | 322 | CE   | LYS | 21 | 17.606 | -8.281  | 0.458  | 1.00 | 0.00 | C |
| ATOM | 323 | NZ   | LYS | 21 | 16.832 | -8.887  | 1.575  | 1.00 | 0.00 | N |
| ATOM | 324 | H    | LYS | 21 | 22.323 | -7.104  | -0.857 | 1.00 | 0.00 | H |
| ATOM | 325 | HA   | LYS | 21 | 21.781 | -9.241  | 0.975  | 1.00 | 0.00 | H |
| ATOM | 326 | 2HB3 | LYS | 21 | 20.625 | -10.288 | -0.906 | 1.00 | 0.00 | H |
| ATOM | 327 | 2HG3 | LYS | 21 | 19.092 | -8.455  | -1.598 | 1.00 | 0.00 | H |
| ATOM | 328 | 2HD3 | LYS | 21 | 19.547 | -8.085  | 1.321  | 1.00 | 0.00 | H |
| ATOM | 329 | 2HE3 | LYS | 21 | 17.203 | -8.632  | -0.481 | 1.00 | 0.00 | H |
| ATOM | 330 | 1HZ  | LYS | 21 | 17.472 | -9.141  | 2.356  | 1.00 | 0.00 | H |
| ATOM | 331 | 2HZ  | LYS | 21 | 16.343 | -9.744  | 1.248  | 1.00 | 0.00 | H |
| ATOM | 332 | 3HZ  | LYS | 21 | 16.125 | -8.210  | 1.930  | 1.00 | 0.00 | H |
| ATOM | 333 | HB2  | LYS | 21 | 21.315 | -9.085  | -2.024 | 1.00 | 0.00 | H |
| ATOM | 334 | HG2  | LYS | 21 | 20.144 | -7.309  | -0.738 | 1.00 | 0.00 | H |
| ATOM | 335 | HD2  | LYS | 21 | 19.150 | -9.716  | 0.734  | 1.00 | 0.00 | H |
| ATOM | 336 | HE2  | LYS | 21 | 17.497 | -7.198  | 0.534  | 1.00 | 0.00 | H |
| ATOM | 337 | N    | ASP | 22 | 24.087 | -9.621  | -1.333 | 1.00 | 0.00 | N |
| ATOM | 338 | CA   | ASP | 22 | 25.224 | -10.440 | -1.737 | 1.00 | 0.00 | C |
| ATOM | 339 | C    | ASP | 22 | 26.145 | -10.714 | -0.551 | 1.00 | 0.00 | C |
| ATOM | 340 | O    | ASP | 22 | 26.622 | -11.833 | -0.368 | 1.00 | 0.00 | O |
| ATOM | 341 | CB   | ASP | 22 | 26.004 | -9.749  | -2.857 | 1.00 | 0.00 | C |
| ATOM | 342 | CG   | ASP | 22 | 25.097 | -9.179  | -3.929 | 1.00 | 0.00 | C |
| ATOM | 343 | OD1  | ASP | 22 | 24.017 | -9.761  | -4.164 | 1.00 | 0.00 | O |
| ATOM | 344 | OD2  | ASP | 22 | 25.466 | -8.149  | -4.533 | 1.00 | 0.00 | O |
| ATOM | 345 | H    | ASP | 22 | 23.918 | -8.774  | -1.797 | 1.00 | 0.00 | H |
| ATOM | 346 | HA   | ASP | 22 | 24.842 | -11.380 | -2.105 | 1.00 | 0.00 | H |
| ATOM | 347 | 2HB3 | ASP | 22 | 26.670 | -10.464 | -3.317 | 1.00 | 0.00 | H |
| ATOM | 348 | HB2  | ASP | 22 | 26.578 | -8.919  | -2.442 | 1.00 | 0.00 | H |
| ATOM | 349 | N    | GLY | 23 | 26.391 | -9.682  | 0.250  | 1.00 | 0.00 | N |
| ATOM | 350 | CA   | GLY | 23 | 27.255 | -9.831  | 1.406  | 1.00 | 0.00 | C |
| ATOM | 351 | C    | GLY | 23 | 28.709 | -9.543  | 1.085  | 1.00 | 0.00 | C |
| ATOM | 352 | O    | GLY | 23 | 29.596 | -10.314 | 1.454  | 1.00 | 0.00 | O |
| ATOM | 353 | H    | GLY | 23 | 25.984 | -8.812  | 0.056  | 1.00 | 0.00 | H |
| ATOM | 354 | 2HA  | GLY | 23 | 26.927 | -9.151  | 2.178  | 1.00 | 0.00 | H |
| ATOM | 355 | 3HA  | GLY | 23 | 27.173 | -10.843 | 1.774  | 1.00 | 0.00 | H |
| ATOM | 356 | N    | ASP | 24 | 28.953 | -8.435  | 0.396  | 1.00 | 0.00 | N |
| ATOM | 357 | CA   | ASP | 24 | 30.307 | -8.050  | 0.023  | 1.00 | 0.00 | C |
| ATOM | 358 | C    | ASP | 24 | 30.632 | -6.647  | 0.529  | 1.00 | 0.00 | C |
| ATOM | 359 | O    | ASP | 24 | 31.698 | -6.410  | 1.093  | 1.00 | 0.00 | O |
| ATOM | 360 | CB   | ASP | 24 | 30.481 | -8.109  | -1.494 | 1.00 | 0.00 | C |
| ATOM | 361 | CG   | ASP | 24 | 29.479 | -7.240  | -2.226 | 1.00 | 0.00 | C |
| ATOM | 362 | OD1  | ASP | 24 | 28.271 | -7.352  | -1.932 | 1.00 | 0.00 | O |
| ATOM | 363 | OD2  | ASP | 24 | 29.902 | -6.447  | -3.094 | 1.00 | 0.00 | O |
| ATOM | 364 | H    | ASP | 24 | 28.202 | -7.865  | 0.129  | 1.00 | 0.00 | H |
| ATOM | 365 | HA   | ASP | 24 | 30.991 | -8.750  | 0.483  | 1.00 | 0.00 | H |
| ATOM | 366 | 2HB3 | ASP | 24 | 30.353 | -9.129  | -1.825 | 1.00 | 0.00 | H |
| ATOM | 367 | HB2  | ASP | 24 | 31.477 | -7.756  | -1.761 | 1.00 | 0.00 | H |
| ATOM | 368 | N    | GLY | 25 | 29.703 | -5.720  | 0.323  | 1.00 | 0.00 | N |
| ATOM | 369 | CA   | GLY | 25 | 29.907 | -4.352  | 0.763  | 1.00 | 0.00 | C |
| ATOM | 370 | C    | GLY | 25 | 29.521 | -3.338  | -0.296 | 1.00 | 0.00 | C |
| ATOM | 371 | O    | GLY | 25 | 30.077 | -2.241  | -0.348 | 1.00 | 0.00 | O |
| ATOM | 372 | H    | GLY | 25 | 28.870 | -5.967  | -0.132 | 1.00 | 0.00 | H |
| ATOM | 373 | 2HA  | GLY | 25 | 29.314 | -4.176  | 1.647  | 1.00 | 0.00 | H |
| ATOM | 374 | 3HA  | GLY | 25 | 30.951 | -4.218  | 1.010  | 1.00 | 0.00 | H |
| ATOM | 375 | N    | THR | 26 | 28.565 | -3.706  | -1.143 | 1.00 | 0.00 | N |

|      |     |      |     |    |        |         |         |      |      |   |
|------|-----|------|-----|----|--------|---------|---------|------|------|---|
| ATOM | 376 | CA   | THR | 26 | 28.107 | -2.822  | -2.209  | 1.00 | 0.00 | C |
| ATOM | 377 | C    | THR | 26 | 26.611 | -2.980  | -2.448  | 1.00 | 0.00 | C |
| ATOM | 378 | O    | THR | 26 | 25.979 | -3.892  | -1.912  | 1.00 | 0.00 | O |
| ATOM | 379 | CB   | THR | 26 | 28.857 | -3.093  | -3.526  | 1.00 | 0.00 | C |
| ATOM | 380 | OG1  | THR | 26 | 28.628 | -4.441  | -3.951  | 1.00 | 0.00 | O |
| ATOM | 381 | CG2  | THR | 26 | 30.349 | -2.854  | -3.356  | 1.00 | 0.00 | C |
| ATOM | 382 | H    | THR | 26 | 28.160 | -4.593  | -1.051  | 1.00 | 0.00 | H |
| ATOM | 383 | HA   | THR | 26 | 28.308 | -1.803  | -1.907  | 1.00 | 0.00 | H |
| ATOM | 384 | HB   | THR | 26 | 28.483 | -2.417  | -4.282  | 1.00 | 0.00 | H |
| ATOM | 385 | 1HG  | THR | 26 | 29.228 | -4.655  | -4.670  | 1.00 | 0.00 | H |
| ATOM | 386 | 1HG2 | THR | 26 | 30.893 | -3.469  | -4.059  | 1.00 | 0.00 | H |
| ATOM | 387 | 2HG2 | THR | 26 | 30.644 | -3.112  | -2.350  | 1.00 | 0.00 | H |
| ATOM | 388 | 3HG2 | THR | 26 | 30.570 | -1.814  | -3.542  | 1.00 | 0.00 | H |
| ATOM | 389 | N    | ILE | 27 | 26.047 | -2.087  | -3.255  | 1.00 | 0.00 | N |
| ATOM | 390 | CA   | ILE | 27 | 24.623 | -2.129  | -3.566  | 1.00 | 0.00 | C |
| ATOM | 391 | C    | ILE | 27 | 24.372 | -1.823  | -5.040  | 1.00 | 0.00 | C |
| ATOM | 392 | O    | ILE | 27 | 24.961 | -0.898  | -5.600  | 1.00 | 0.00 | O |
| ATOM | 393 | CB   | ILE | 27 | 23.828 | -1.133  | -2.704  | 1.00 | 0.00 | C |
| ATOM | 394 | CG2  | ILE | 27 | 22.338 | -1.261  | -2.982  | 1.00 | 0.00 | C |
| ATOM | 395 | CG1  | ILE | 27 | 24.120 | -1.363  | -1.220  | 1.00 | 0.00 | C |
| ATOM | 396 | CD1  | ILE | 27 | 23.853 | -0.150  | -0.355  | 1.00 | 0.00 | C |
| ATOM | 397 | H    | ILE | 27 | 26.601 | -1.384  | -3.652  | 1.00 | 0.00 | H |
| ATOM | 398 | HA   | ILE | 27 | 24.266 | -3.127  | -3.352  | 1.00 | 0.00 | H |
| ATOM | 399 | HB   | ILE | 27 | 24.135 | -0.133  | -2.972  | 1.00 | 0.00 | H |
| ATOM | 400 | 1HG2 | ILE | 27 | 21.849 | -1.712  | -2.132  | 1.00 | 0.00 | H |
| ATOM | 401 | 2HG2 | ILE | 27 | 21.919 | -0.281  | -3.159  | 1.00 | 0.00 | H |
| ATOM | 402 | 3HG2 | ILE | 27 | 22.186 | -1.880  | -3.853  | 1.00 | 0.00 | H |
| ATOM | 403 | 2HG3 | ILE | 27 | 25.158 | -1.633  | -1.102  | 1.00 | 0.00 | H |
| ATOM | 404 | 1HD1 | ILE | 27 | 24.448 | 0.680   | -0.708  | 1.00 | 0.00 | H |
| ATOM | 405 | 2HD1 | ILE | 27 | 22.807 | 0.107   | -0.406  | 1.00 | 0.00 | H |
| ATOM | 406 | 3HD1 | ILE | 27 | 24.119 | -0.372  | 0.669   | 1.00 | 0.00 | H |
| ATOM | 407 | HG2  | ILE | 27 | 23.481 | -2.163  | -0.843  | 1.00 | 0.00 | H |
| ATOM | 408 | N    | THR | 28 | 23.493 | -2.604  | -5.659  | 1.00 | 0.00 | N |
| ATOM | 409 | CA   | THR | 28 | 23.164 | -2.415  | -7.067  | 1.00 | 0.00 | C |
| ATOM | 410 | C    | THR | 28 | 21.658 | -2.474  | -7.291  | 1.00 | 0.00 | C |
| ATOM | 411 | O    | THR | 28 | 20.890 | -2.735  | -6.363  | 1.00 | 0.00 | O |
| ATOM | 412 | CB   | THR | 28 | 23.846 | -3.478  | -7.950  | 1.00 | 0.00 | C |
| ATOM | 413 | OG1  | THR | 28 | 23.587 | -3.204  | -9.331  | 1.00 | 0.00 | O |
| ATOM | 414 | CG2  | THR | 28 | 23.347 | -4.872  | -7.602  | 1.00 | 0.00 | C |
| ATOM | 415 | H    | THR | 28 | 23.057 | -3.325  | -5.159  | 1.00 | 0.00 | H |
| ATOM | 416 | HA   | THR | 28 | 23.525 | -1.442  | -7.367  | 1.00 | 0.00 | H |
| ATOM | 417 | HB   | THR | 28 | 24.911 | -3.438  | -7.776  | 1.00 | 0.00 | H |
| ATOM | 418 | 1HG  | THR | 28 | 23.945 | -3.913  | -9.873  | 1.00 | 0.00 | H |
| ATOM | 419 | 1HG2 | THR | 28 | 23.880 | -5.239  | -6.737  | 1.00 | 0.00 | H |
| ATOM | 420 | 2HG2 | THR | 28 | 23.515 | -5.533  | -8.438  | 1.00 | 0.00 | H |
| ATOM | 421 | 3HG2 | THR | 28 | 22.291 | -4.831  | -7.383  | 1.00 | 0.00 | H |
| ATOM | 422 | N    | THR | 29 | 21.238 | -2.229  | -8.529  | 1.00 | 0.00 | N |
| ATOM | 423 | CA   | THR | 29 | 19.824 | -2.254  | -8.877  | 1.00 | 0.00 | C |
| ATOM | 424 | C    | THR | 29 | 19.148 | -3.505  | -8.333  | 1.00 | 0.00 | C |
| ATOM | 425 | O    | THR | 29 | 17.995 | -3.463  | -7.894  | 1.00 | 0.00 | O |
| ATOM | 426 | CB   | THR | 29 | 19.617 | -2.192  | -10.402 | 1.00 | 0.00 | C |
| ATOM | 427 | OG1  | THR | 29 | 20.093 | -3.398  | -11.009 | 1.00 | 0.00 | O |
| ATOM | 428 | CG2  | THR | 29 | 20.343 | -0.996  | -10.997 | 1.00 | 0.00 | C |
| ATOM | 429 | H    | THR | 29 | 21.899 | -2.026  | -9.226  | 1.00 | 0.00 | H |
| ATOM | 430 | HA   | THR | 29 | 19.358 | -1.384  | -8.435  | 1.00 | 0.00 | H |
| ATOM | 431 | HB   | THR | 29 | 18.560 | -2.090  | -10.602 | 1.00 | 0.00 | H |
| ATOM | 432 | 1HG  | THR | 29 | 19.952 | -4.136  | -10.411 | 1.00 | 0.00 | H |
| ATOM | 433 | 1HG2 | THR | 29 | 20.120 | -0.928  | -12.051 | 1.00 | 0.00 | H |
| ATOM | 434 | 2HG2 | THR | 29 | 21.408 | -1.119  | -10.864 | 1.00 | 0.00 | H |
| ATOM | 435 | 3HG2 | THR | 29 | 20.020 | -0.094  | -10.501 | 1.00 | 0.00 | H |
| ATOM | 436 | N    | LYS | 30 | 19.867 | -4.622  | -8.364  | 1.00 | 0.00 | N |
| ATOM | 437 | CA   | LYS | 30 | 19.336 | -5.890  | -7.874  | 1.00 | 0.00 | C |
| ATOM | 438 | C    | LYS | 30 | 19.015 | -5.804  | -6.384  | 1.00 | 0.00 | C |
| ATOM | 439 | O    | LYS | 30 | 17.949 | -6.236  | -5.945  | 1.00 | 0.00 | O |
| ATOM | 440 | CB   | LYS | 30 | 20.339 | -7.018  | -8.125  | 1.00 | 0.00 | C |
| ATOM | 441 | CG   | LYS | 30 | 19.927 | -8.346  | -7.512  | 1.00 | 0.00 | C |
| ATOM | 442 | CD   | LYS | 30 | 18.900 | -9.062  | -8.371  | 1.00 | 0.00 | C |
| ATOM | 443 | CE   | LYS | 30 | 19.561 | -9.853  | -9.489  | 1.00 | 0.00 | C |
| ATOM | 444 | NZ   | LYS | 30 | 18.577 | -10.290 | -10.517 | 1.00 | 0.00 | N |
| ATOM | 445 | H    | LYS | 30 | 20.778 | -4.594  | -8.725  | 1.00 | 0.00 | H |
| ATOM | 446 | HA   | LYS | 30 | 18.427 | -6.101  | -8.414  | 1.00 | 0.00 | H |
| ATOM | 447 | 2HB3 | LYS | 30 | 21.294 | -6.733  | -7.707  | 1.00 | 0.00 | H |
| ATOM | 448 | 2HG3 | LYS | 30 | 19.504 | -8.165  | -6.534  | 1.00 | 0.00 | H |
| ATOM | 449 | 2HD3 | LYS | 30 | 18.234 | -8.329  | -8.805  | 1.00 | 0.00 | H |
| ATOM | 450 | 2HE3 | LYS | 30 | 20.037 | -10.724 | -9.064  | 1.00 | 0.00 | H |
| ATOM | 451 | 1HZ  | LYS | 30 | 18.991 | -10.206 | -11.468 | 1.00 | 0.00 | H |
| ATOM | 452 | 2HZ  | LYS | 30 | 17.723 | -9.701  | -10.468 | 1.00 | 0.00 | H |



|      |     |      |     |    |        |         |         |      |      |   |
|------|-----|------|-----|----|--------|---------|---------|------|------|---|
| ATOM | 453 | 3HZ  | LYS | 30 | 18.307 | -11.282 | -10.356 | 1.00 | 0.00 | H |
| ATOM | 454 | HB2  | LYS | 30 | 20.430 | -7.191  | -9.197  | 1.00 | 0.00 | H |
| ATOM | 455 | HG2  | LYS | 30 | 20.801 | -8.992  | -7.425  | 1.00 | 0.00 | H |
| ATOM | 456 | HD2  | LYS | 30 | 18.334 | -9.759  | -7.755  | 1.00 | 0.00 | H |
| ATOM | 457 | HE2  | LYS | 30 | 20.300 | -9.227  | -9.990  | 1.00 | 0.00 | H |
| ATOM | 458 | N    | GLU | 31 | 19.941 | -5.242  | -5.615  | 1.00 | 0.00 | N |
| ATOM | 459 | CA   | GLU | 31 | 19.754 | -5.101  | -4.175  | 1.00 | 0.00 | C |
| ATOM | 460 | C    | GLU | 31 | 18.846 | -3.916  | -3.858  | 1.00 | 0.00 | C |
| ATOM | 461 | O    | GLU | 31 | 17.752 | -4.084  | -3.316  | 1.00 | 0.00 | O |
| ATOM | 462 | CB   | GLU | 31 | 21.104 | -4.922  | -3.478  | 1.00 | 0.00 | C |
| ATOM | 463 | CG   | GLU | 31 | 21.995 | -6.150  | -3.555  | 1.00 | 0.00 | C |
| ATOM | 464 | CD   | GLU | 31 | 23.471 | -5.800  | -3.516  | 1.00 | 0.00 | C |
| ATOM | 465 | OE1  | GLU | 31 | 23.997 | -5.329  | -4.546  | 1.00 | 0.00 | O |
| ATOM | 466 | OE2  | GLU | 31 | 24.101 | -6.003  | -2.457  | 1.00 | 0.00 | O |
| ATOM | 467 | H    | GLU | 31 | 20.770 | -4.915  | -6.023  | 1.00 | 0.00 | H |
| ATOM | 468 | HA   | GLU | 31 | 19.287 | -6.003  | -3.810  | 1.00 | 0.00 | H |
| ATOM | 469 | 2HB3 | GLU | 31 | 20.931 | -4.694  | -2.437  | 1.00 | 0.00 | H |
| ATOM | 470 | 2HG3 | GLU | 31 | 21.788 | -6.672  | -4.479  | 1.00 | 0.00 | H |
| ATOM | 471 | HB2  | GLU | 31 | 21.654 | -4.111  | -3.956  | 1.00 | 0.00 | H |
| ATOM | 472 | HG2  | GLU | 31 | 21.795 | -6.801  | -2.702  | 1.00 | 0.00 | H |
| ATOM | 473 | N    | LEU | 32 | 19.304 | -2.717  | -4.201  | 1.00 | 0.00 | N |
| ATOM | 474 | CA   | LEU | 32 | 18.533 | -1.504  | -3.954  | 1.00 | 0.00 | C |
| ATOM | 475 | C    | LEU | 32 | 17.111 | -1.645  | -4.486  | 1.00 | 0.00 | C |
| ATOM | 476 | O    | LEU | 32 | 16.154 | -1.200  | -3.852  | 1.00 | 0.00 | O |
| ATOM | 477 | CB   | LEU | 32 | 19.217 | -0.302  | -4.608  | 1.00 | 0.00 | C |
| ATOM | 478 | CG   | LEU | 32 | 18.479 | 1.033   | -4.494  | 1.00 | 0.00 | C |
| ATOM | 479 | CD1  | LEU | 32 | 18.397 | 1.476   | -3.043  | 1.00 | 0.00 | C |
| ATOM | 480 | CD2  | LEU | 32 | 19.165 | 2.098   | -5.340  | 1.00 | 0.00 | C |
| ATOM | 481 | H    | LEU | 32 | 20.181 | -2.647  | -4.632  | 1.00 | 0.00 | H |
| ATOM | 482 | HA   | LEU | 32 | 18.493 | -1.349  | -2.887  | 1.00 | 0.00 | H |
| ATOM | 483 | 2HB3 | LEU | 32 | 19.341 | -0.523  | -5.660  | 1.00 | 0.00 | H |
| ATOM | 484 | HG   | LEU | 32 | 17.470 | 0.911   | -4.863  | 1.00 | 0.00 | H |
| ATOM | 485 | 1HD1 | LEU | 32 | 18.406 | 0.608   | -2.401  | 1.00 | 0.00 | H |
| ATOM | 486 | 2HD1 | LEU | 32 | 17.484 | 2.032   | -2.885  | 1.00 | 0.00 | H |
| ATOM | 487 | 3HD1 | LEU | 32 | 19.245 | 2.104   | -2.808  | 1.00 | 0.00 | H |
| ATOM | 488 | 1HD2 | LEU | 32 | 19.995 | 2.516   | -4.787  | 1.00 | 0.00 | H |
| ATOM | 489 | 2HD2 | LEU | 32 | 18.460 | 2.879   | -5.576  | 1.00 | 0.00 | H |
| ATOM | 490 | 3HD2 | LEU | 32 | 19.529 | 1.650   | -6.252  | 1.00 | 0.00 | H |
| ATOM | 491 | HB2  | LEU | 32 | 20.180 | -0.124  | -4.129  | 1.00 | 0.00 | H |
| ATOM | 492 | N    | GLY | 33 | 16.977 | -2.271  | -5.651  | 1.00 | 0.00 | N |
| ATOM | 493 | CA   | GLY | 33 | 15.667 | -2.459  | -6.246  | 1.00 | 0.00 | C |
| ATOM | 494 | C    | GLY | 33 | 14.835 | -3.481  | -5.497  | 1.00 | 0.00 | C |
| ATOM | 495 | O    | GLY | 33 | 13.612 | -3.523  | -5.642  | 1.00 | 0.00 | O |
| ATOM | 496 | H    | GLY | 33 | 17.775 | -2.603  | -6.112  | 1.00 | 0.00 | H |
| ATOM | 497 | 2HA  | GLY | 33 | 15.144 | -1.514  | -6.247  | 1.00 | 0.00 | H |
| ATOM | 498 | 3HA  | GLY | 33 | 15.792 | -2.792  | -7.266  | 1.00 | 0.00 | H |
| ATOM | 499 | N    | THR | 34 | 15.496 | -4.309  | -4.698  | 1.00 | 0.00 | N |
| ATOM | 500 | CA   | THR | 34 | 14.810 | -5.341  | -3.925  | 1.00 | 0.00 | C |
| ATOM | 501 | C    | THR | 34 | 14.196 | -4.758  | -2.658  | 1.00 | 0.00 | C |
| ATOM | 502 | O    | THR | 34 | 13.209 | -5.280  | -2.139  | 1.00 | 0.00 | O |
| ATOM | 503 | CB   | THR | 34 | 15.765 | -6.486  | -3.542  | 1.00 | 0.00 | C |
| ATOM | 504 | OG1  | THR | 34 | 15.062 | -7.733  | -3.542  | 1.00 | 0.00 | O |
| ATOM | 505 | CG2  | THR | 34 | 16.377 | -6.243  | -2.170  | 1.00 | 0.00 | C |
| ATOM | 506 | H    | THR | 34 | 16.471 | -4.228  | -4.624  | 1.00 | 0.00 | H |
| ATOM | 507 | HA   | THR | 34 | 14.023 | -5.749  | -4.542  | 1.00 | 0.00 | H |
| ATOM | 508 | HB   | THR | 34 | 16.562 | -6.530  | -4.272  | 1.00 | 0.00 | H |
| ATOM | 509 | 1HG  | THR | 34 | 14.674 | -7.882  | -2.676  | 1.00 | 0.00 | H |
| ATOM | 510 | 1HG2 | THR | 34 | 17.373 | -6.656  | -2.142  | 1.00 | 0.00 | H |
| ATOM | 511 | 2HG2 | THR | 34 | 15.769 | -6.719  | -1.416  | 1.00 | 0.00 | H |
| ATOM | 512 | 3HG2 | THR | 34 | 16.423 | -5.181  | -1.978  | 1.00 | 0.00 | H |
| ATOM | 513 | N    | VAL | 35 | 14.786 | -3.675  | -2.164  | 1.00 | 0.00 | N |
| ATOM | 514 | CA   | VAL | 35 | 14.295 | -3.020  | -0.955  | 1.00 | 0.00 | C |
| ATOM | 515 | C    | VAL | 35 | 13.442 | -1.804  | -1.297  | 1.00 | 0.00 | C |
| ATOM | 516 | O    | VAL | 35 | 12.455 | -1.517  | -0.621  | 1.00 | 0.00 | O |
| ATOM | 517 | CB   | VAL | 35 | 15.457 | -2.580  | -0.045  | 1.00 | 0.00 | C |
| ATOM | 518 | CG1  | VAL | 35 | 15.049 | -1.379  | 0.796   | 1.00 | 0.00 | C |
| ATOM | 519 | CG2  | VAL | 35 | 15.905 | -3.734  | 0.842   | 1.00 | 0.00 | C |
| ATOM | 520 | H    | VAL | 35 | 15.569 | -3.306  | -2.622  | 1.00 | 0.00 | H |
| ATOM | 521 | HA   | VAL | 35 | 13.691 | -3.734  | -0.413  | 1.00 | 0.00 | H |
| ATOM | 522 | HB   | VAL | 35 | 16.288 | -2.290  | -0.670  | 1.00 | 0.00 | H |
| ATOM | 523 | 1HG1 | VAL | 35 | 14.020 | -1.491  | 1.106   | 1.00 | 0.00 | H |
| ATOM | 524 | 2HG1 | VAL | 35 | 15.685 | -1.317  | 1.667   | 1.00 | 0.00 | H |
| ATOM | 525 | 3HG1 | VAL | 35 | 15.152 | -0.479  | 0.207   | 1.00 | 0.00 | H |
| ATOM | 526 | 1HG2 | VAL | 35 | 15.042 | -4.192  | 1.298   | 1.00 | 0.00 | H |
| ATOM | 527 | 2HG2 | VAL | 35 | 16.427 | -4.467  | 0.243   | 1.00 | 0.00 | H |
| ATOM | 528 | 3HG2 | VAL | 35 | 16.567 | -3.362  | 1.609   | 1.00 | 0.00 | H |
| ATOM | 529 | N    | MET | 36 | 13.828 | -1.095  | -2.351  | 1.00 | 0.00 | N |

|      |     |      |     |    |        |        |        |      |      |   |
|------|-----|------|-----|----|--------|--------|--------|------|------|---|
| ATOM | 530 | CA   | MET | 36 | 13.096 | 0.092  | -2.784 | 1.00 | 0.00 | C |
| ATOM | 531 | C    | MET | 36 | 11.654 | -0.260 | -3.136 | 1.00 | 0.00 | C |
| ATOM | 532 | O    | MET | 36 | 10.728 | 0.482  | -2.807 | 1.00 | 0.00 | O |
| ATOM | 533 | CB   | MET | 36 | 13.787 | 0.729  | -3.990 | 1.00 | 0.00 | C |
| ATOM | 534 | CG   | MET | 36 | 14.985 | 1.589  | -3.622 | 1.00 | 0.00 | C |
| ATOM | 535 | SD   | MET | 36 | 15.252 | 2.942  | -4.782 | 1.00 | 0.00 | S |
| ATOM | 536 | CE   | MET | 36 | 13.727 | 3.860  | -4.589 | 1.00 | 0.00 | C |
| ATOM | 537 | H    | MET | 36 | 14.624 | -1.374 | -2.852 | 1.00 | 0.00 | H |
| ATOM | 538 | HA   | MET | 36 | 13.096 | 0.795  | -1.967 | 1.00 | 0.00 | H |
| ATOM | 539 | 2HB3 | MET | 36 | 13.073 | 1.350  | -4.512 | 1.00 | 0.00 | H |
| ATOM | 540 | 2HG3 | MET | 36 | 15.866 | 0.966  | -3.607 | 1.00 | 0.00 | H |
| ATOM | 541 | 1HE  | MET | 36 | 12.990 | 3.489  | -5.286 | 1.00 | 0.00 | H |
| ATOM | 542 | 2HE  | MET | 36 | 13.359 | 3.741  | -3.579 | 1.00 | 0.00 | H |
| ATOM | 543 | 3HE  | MET | 36 | 13.910 | 4.908  | -4.783 | 1.00 | 0.00 | H |
| ATOM | 544 | HB2  | MET | 36 | 14.163 | -0.053 | -4.651 | 1.00 | 0.00 | H |
| ATOM | 545 | HG2  | MET | 36 | 14.821 | 2.038  | -2.641 | 1.00 | 0.00 | H |
| ATOM | 546 | N    | ARG | 37 | 11.471 | -1.393 | -3.805 | 1.00 | 0.00 | N |
| ATOM | 547 | CA   | ARG | 37 | 10.140 | -1.839 | -4.202 | 1.00 | 0.00 | C |
| ATOM | 548 | C    | ARG | 37 | 9.343  | -2.316 | -2.989 | 1.00 | 0.00 | C |
| ATOM | 549 | O    | ARG | 37 | 8.118  | -2.414 | -3.042 | 1.00 | 0.00 | O |
| ATOM | 550 | CB   | ARG | 37 | 10.243 | -2.963 | -5.232 | 1.00 | 0.00 | C |
| ATOM | 551 | CG   | ARG | 37 | 11.073 | -4.148 | -4.762 | 1.00 | 0.00 | C |
| ATOM | 552 | CD   | ARG | 37 | 10.247 | -5.105 | -3.917 | 1.00 | 0.00 | C |
| ATOM | 553 | NE   | ARG | 37 | 10.710 | -6.486 | -4.048 | 1.00 | 0.00 | N |
| ATOM | 554 | CZ   | ARG | 37 | 9.928  | -7.543 | -3.850 | 1.00 | 0.00 | C |
| ATOM | 555 | NH1  | ARG | 37 | 8.656  | -7.379 | -3.515 | 1.00 | 0.00 | N |
| ATOM | 556 | NH2  | ARG | 37 | 10.422 | -8.768 | -3.986 | 1.00 | 0.00 | N |
| ATOM | 557 | H    | ARG | 37 | 12.249 | -1.942 | -4.038 | 1.00 | 0.00 | H |
| ATOM | 558 | HA   | ARG | 37 | 9.628  | -1.000 | -4.647 | 1.00 | 0.00 | H |
| ATOM | 559 | 2HB3 | ARG | 37 | 10.692 | -2.572 | -6.131 | 1.00 | 0.00 | H |
| ATOM | 560 | 2HG3 | ARG | 37 | 11.900 | -3.783 | -4.173 | 1.00 | 0.00 | H |
| ATOM | 561 | 2HD3 | ARG | 37 | 9.218  | -5.048 | -4.236 | 1.00 | 0.00 | H |
| ATOM | 562 | HE   | ARG | 37 | 11.646 | -6.631 | -4.293 | 1.00 | 0.00 | H |
| ATOM | 563 | 1HH1 | ARG | 37 | 8.283  | -6.458 | -3.413 | 1.00 | 0.00 | H |
| ATOM | 564 | 2HH1 | ARG | 37 | 8.071  | -8.178 | -3.367 | 1.00 | 0.00 | H |
| ATOM | 565 | 1HH2 | ARG | 37 | 11.380 | -8.896 | -4.239 | 1.00 | 0.00 | H |
| ATOM | 566 | 2HH2 | ARG | 37 | 9.834  | -9.563 | -3.838 | 1.00 | 0.00 | H |
| ATOM | 567 | HB2  | ARG | 37 | 9.247  | -3.356 | -5.445 | 1.00 | 0.00 | H |
| ATOM | 568 | HG2  | ARG | 37 | 11.444 | -4.696 | -5.626 | 1.00 | 0.00 | H |
| ATOM | 569 | HD2  | ARG | 37 | 10.332 | -4.829 | -2.865 | 1.00 | 0.00 | H |
| ATOM | 570 | N    | SER | 38 | 10.048 | -2.610 | -1.903 | 1.00 | 0.00 | N |
| ATOM | 571 | CA   | SER | 38 | 9.408  | -3.080 | -0.679 | 1.00 | 0.00 | C |
| ATOM | 572 | C    | SER | 38 | 8.544  | -1.985 | -0.064 | 1.00 | 0.00 | C |
| ATOM | 573 | O    | SER | 38 | 7.521  | -2.264 | 0.564  | 1.00 | 0.00 | O |
| ATOM | 574 | CB   | SER | 38 | 10.462 | -3.541 | 0.328  | 1.00 | 0.00 | C |
| ATOM | 575 | OG   | SER | 38 | 11.314 | -4.523 | -0.235 | 1.00 | 0.00 | O |
| ATOM | 576 | H    | SER | 38 | 11.023 | -2.512 | -1.925 | 1.00 | 0.00 | H |
| ATOM | 577 | HA   | SER | 38 | 8.779  | -3.917 | -0.937 | 1.00 | 0.00 | H |
| ATOM | 578 | 2HB3 | SER | 38 | 9.969  | -3.962 | 1.193  | 1.00 | 0.00 | H |
| ATOM | 579 | HG   | SER | 38 | 10.819 | -5.049 | -0.867 | 1.00 | 0.00 | H |
| ATOM | 580 | HB2  | SER | 38 | 11.071 | -2.690 | 0.632  | 1.00 | 0.00 | H |
| ATOM | 581 | N    | LEU | 39 | 8.958  | -0.737 | -0.250 | 1.00 | 0.00 | N |
| ATOM | 582 | CA   | LEU | 39 | 8.221  | 0.402  | 0.285  | 1.00 | 0.00 | C |
| ATOM | 583 | C    | LEU | 39 | 7.090  | 0.811  | -0.652 | 1.00 | 0.00 | C |
| ATOM | 584 | O    | LEU | 39 | 5.994  | 1.155  | -0.209 | 1.00 | 0.00 | O |
| ATOM | 585 | CB   | LEU | 39 | 9.166  | 1.583  | 0.511  | 1.00 | 0.00 | C |
| ATOM | 586 | CG   | LEU | 39 | 10.123 | 1.465  | 1.698  | 1.00 | 0.00 | C |
| ATOM | 587 | CD1  | LEU | 39 | 11.130 | 2.603  | 1.687  | 1.00 | 0.00 | C |
| ATOM | 588 | CD2  | LEU | 39 | 9.347  | 1.449  | 3.006  | 1.00 | 0.00 | C |
| ATOM | 589 | H    | LEU | 39 | 9.779  | -0.579 | -0.761 | 1.00 | 0.00 | H |
| ATOM | 590 | HA   | LEU | 39 | 7.799  | 0.105  | 1.232  | 1.00 | 0.00 | H |
| ATOM | 591 | 2HB3 | LEU | 39 | 8.558  | 2.468  | 0.661  | 1.00 | 0.00 | H |
| ATOM | 592 | HG   | LEU | 39 | 10.668 | 0.534  | 1.619  | 1.00 | 0.00 | H |
| ATOM | 593 | 1HD1 | LEU | 39 | 11.492 | 2.773  | 2.689  | 1.00 | 0.00 | H |
| ATOM | 594 | 2HD1 | LEU | 39 | 10.657 | 3.503  | 1.318  | 1.00 | 0.00 | H |
| ATOM | 595 | 3HD1 | LEU | 39 | 11.958 | 2.345  | 1.043  | 1.00 | 0.00 | H |
| ATOM | 596 | 1HD2 | LEU | 39 | 8.288  | 1.412  | 2.797  | 1.00 | 0.00 | H |
| ATOM | 597 | 2HD2 | LEU | 39 | 9.572  | 2.342  | 3.569  | 1.00 | 0.00 | H |
| ATOM | 598 | 3HD2 | LEU | 39 | 9.630  | 0.579  | 3.582  | 1.00 | 0.00 | H |
| ATOM | 599 | HB2  | LEU | 39 | 9.820  | 1.696  | -0.354 | 1.00 | 0.00 | H |
| ATOM | 600 | N    | GLY | 40 | 7.364  | 0.767  | -1.953 | 1.00 | 0.00 | N |
| ATOM | 601 | CA   | GLY | 40 | 6.357  | 1.131  | -2.933 | 1.00 | 0.00 | C |
| ATOM | 602 | C    | GLY | 40 | 6.885  | 2.103  | -3.971 | 1.00 | 0.00 | C |
| ATOM | 603 | O    | GLY | 40 | 6.161  | 2.993  | -4.420 | 1.00 | 0.00 | O |
| ATOM | 604 | H    | GLY | 40 | 8.253  | 0.483  | -2.249 | 1.00 | 0.00 | H |
| ATOM | 605 | 2HA  | GLY | 40 | 6.016  | 0.238  | -3.436 | 1.00 | 0.00 | H |
| ATOM | 606 | 3HA  | GLY | 40 | 5.521  | 1.585  | -2.423 | 1.00 | 0.00 | H |

|      |     |      |     |    |        |        |         |      |      |   |
|------|-----|------|-----|----|--------|--------|---------|------|------|---|
| ATOM | 607 | N    | GLN | 41 | 8.147  | 1.935  | -4.348  | 1.00 | 0.00 | N |
| ATOM | 608 | CA   | GLN | 41 | 8.771  | 2.809  | -5.337  | 1.00 | 0.00 | C |
| ATOM | 609 | C    | GLN | 41 | 8.802  | 2.143  | -6.709  | 1.00 | 0.00 | C |
| ATOM | 610 | O    | GLN | 41 | 8.541  | 2.784  | -7.724  | 1.00 | 0.00 | O |
| ATOM | 611 | CB   | GLN | 41 | 10.192 | 3.172  | -4.901  | 1.00 | 0.00 | C |
| ATOM | 612 | CG   | GLN | 41 | 10.240 | 4.114  | -3.709  | 1.00 | 0.00 | C |
| ATOM | 613 | CD   | GLN | 41 | 9.295  | 5.290  | -3.855  | 1.00 | 0.00 | C |
| ATOM | 614 | OE1  | GLN | 41 | 9.035  | 5.759  | -4.964  | 1.00 | 0.00 | O |
| ATOM | 615 | NE2  | GLN | 41 | 8.773  | 5.774  | -2.735  | 1.00 | 0.00 | N |
| ATOM | 616 | H    | GLN | 41 | 8.670  | 1.210  | -3.952  | 1.00 | 0.00 | H |
| ATOM | 617 | HA   | GLN | 41 | 8.181  | 3.710  | -5.400  | 1.00 | 0.00 | H |
| ATOM | 618 | 2HB3 | GLN | 41 | 10.697 | 3.648  | -5.731  | 1.00 | 0.00 | H |
| ATOM | 619 | 2HG3 | GLN | 41 | 11.248 | 4.491  | -3.607  | 1.00 | 0.00 | H |
| ATOM | 620 | 1HE2 | GLN | 41 | 9.025  | 5.349  | -1.888  | 1.00 | 0.00 | H |
| ATOM | 621 | 2HE2 | GLN | 41 | 8.158  | 6.534  | -2.800  | 1.00 | 0.00 | H |
| ATOM | 622 | HB2  | GLN | 41 | 10.724 | 2.269  | -4.602  | 1.00 | 0.00 | H |
| ATOM | 623 | HG2  | GLN | 41 | 9.944  | 3.577  | -2.809  | 1.00 | 0.00 | H |
| ATOM | 624 | N    | ASN | 42 | 9.119  | 0.852  | -6.728  | 1.00 | 0.00 | N |
| ATOM | 625 | CA   | ASN | 42 | 9.184  | 0.101  | -7.975  | 1.00 | 0.00 | C |
| ATOM | 626 | C    | ASN | 42 | 9.851  | 0.924  | -9.073  | 1.00 | 0.00 | C |
| ATOM | 627 | O    | ASN | 42 | 9.322  | 1.081  | -10.174 | 1.00 | 0.00 | O |
| ATOM | 628 | CB   | ASN | 42 | 7.780  | -0.317 | -8.418  | 1.00 | 0.00 | C |
| ATOM | 629 | CG   | ASN | 42 | 7.363  | -1.652 | -7.834  | 1.00 | 0.00 | C |
| ATOM | 630 | OD1  | ASN | 42 | 7.903  | -2.696 | -8.197  | 1.00 | 0.00 | O |
| ATOM | 631 | ND2  | ASN | 42 | 6.396  | -1.625 | -6.925  | 1.00 | 0.00 | N |
| ATOM | 632 | H    | ASN | 42 | 9.315  | 0.396  | -5.884  | 1.00 | 0.00 | H |
| ATOM | 633 | HA   | ASN | 42 | 9.774  | -0.787 | -7.799  | 1.00 | 0.00 | H |
| ATOM | 634 | 2HB3 | ASN | 42 | 7.754  | -0.391 | -9.494  | 1.00 | 0.00 | H |
| ATOM | 635 | 1HD2 | ASN | 42 | 6.010  | -0.757 | -6.684  | 1.00 | 0.00 | H |
| ATOM | 636 | 2HD2 | ASN | 42 | 6.107  | -2.475 | -6.529  | 1.00 | 0.00 | H |
| ATOM | 637 | HB2  | ASN | 42 | 7.056  | 0.425  | -8.078  | 1.00 | 0.00 | H |
| ATOM | 638 | N    | PRO | 43 | 11.040 | 1.462  | -8.769  | 1.00 | 0.00 | N |
| ATOM | 639 | CA   | PRO | 43 | 11.807 | 2.277  | -9.715  | 1.00 | 0.00 | C |
| ATOM | 640 | C    | PRO | 43 | 12.367 | 1.454  | -10.871 | 1.00 | 0.00 | C |
| ATOM | 641 | O    | PRO | 43 | 12.820 | 0.324  | -10.678 | 1.00 | 0.00 | O |
| ATOM | 642 | CD   | PRO | 43 | 11.730 | 1.316  | -7.476  | 1.00 | 0.00 | C |
| ATOM | 643 | CB   | PRO | 43 | 12.944 | 2.842  | -8.859  | 1.00 | 0.00 | C |
| ATOM | 644 | CG   | PRO | 43 | 13.105 | 1.859  | -7.750  | 1.00 | 0.00 | C |
| ATOM | 645 | HA   | PRO | 43 | 11.216 | 3.090  | -10.110 | 1.00 | 0.00 | H |
| ATOM | 646 | 2HB3 | PRO | 43 | 12.671 | 3.815  | -8.487  | 1.00 | 0.00 | H |
| ATOM | 647 | 2HG3 | PRO | 43 | 13.494 | 2.357  | -6.874  | 1.00 | 0.00 | H |
| ATOM | 648 | 2HD3 | PRO | 43 | 11.241 | 1.901  | -6.709  | 1.00 | 0.00 | H |
| ATOM | 649 | HD2  | PRO | 43 | 11.774 | 0.262  | -7.203  | 1.00 | 0.00 | H |
| ATOM | 650 | HB2  | PRO | 43 | 13.846 | 2.932  | -9.467  | 1.00 | 0.00 | H |
| ATOM | 651 | HG2  | PRO | 43 | 13.762 | 1.045  | -8.059  | 1.00 | 0.00 | H |
| ATOM | 652 | N    | THR | 44 | 12.330 | 2.023  | -12.070 | 1.00 | 0.00 | N |
| ATOM | 653 | CA   | THR | 44 | 12.833 | 1.341  | -13.256 | 1.00 | 0.00 | C |
| ATOM | 654 | C    | THR | 44 | 14.356 | 1.376  | -13.307 | 1.00 | 0.00 | C |
| ATOM | 655 | O    | THR | 44 | 14.991 | 2.176  | -12.619 | 1.00 | 0.00 | O |
| ATOM | 656 | CB   | THR | 44 | 12.273 | 1.968  | -14.546 | 1.00 | 0.00 | C |
| ATOM | 657 | OG1  | THR | 44 | 12.623 | 3.355  | -14.607 | 1.00 | 0.00 | O |
| ATOM | 658 | CG2  | THR | 44 | 10.759 | 1.819  | -14.607 | 1.00 | 0.00 | C |
| ATOM | 659 | H    | THR | 44 | 11.955 | 2.924  | -12.159 | 1.00 | 0.00 | H |
| ATOM | 660 | HA   | THR | 44 | 12.508 | 0.312  | -13.211 | 1.00 | 0.00 | H |
| ATOM | 661 | HB   | THR | 44 | 12.705 | 1.458  | -15.394 | 1.00 | 0.00 | H |
| ATOM | 662 | 1HG  | THR | 44 | 12.769 | 3.608  | -15.522 | 1.00 | 0.00 | H |
| ATOM | 663 | 1HG2 | THR | 44 | 10.407 | 2.136  | -15.576 | 1.00 | 0.00 | H |
| ATOM | 664 | 2HG2 | THR | 44 | 10.306 | 2.429  | -13.840 | 1.00 | 0.00 | H |
| ATOM | 665 | 3HG2 | THR | 44 | 10.494 | 0.784  | -14.449 | 1.00 | 0.00 | H |
| ATOM | 666 | N    | GLU | 45 | 14.938 | 0.506  | -14.126 | 1.00 | 0.00 | N |
| ATOM | 667 | CA   | GLU | 45 | 16.388 | 0.440  | -14.266 | 1.00 | 0.00 | C |
| ATOM | 668 | C    | GLU | 45 | 16.991 | 1.839  | -14.341 | 1.00 | 0.00 | C |
| ATOM | 669 | O    | GLU | 45 | 17.847 | 2.201  | -13.535 | 1.00 | 0.00 | O |
| ATOM | 670 | CB   | GLU | 45 | 16.765 | -0.358 | -15.516 | 1.00 | 0.00 | C |
| ATOM | 671 | CG   | GLU | 45 | 16.939 | -1.845 | -15.258 | 1.00 | 0.00 | C |
| ATOM | 672 | CD   | GLU | 45 | 17.628 | -2.561 | -16.405 | 1.00 | 0.00 | C |
| ATOM | 673 | OE1  | GLU | 45 | 17.044 | -2.615 | -17.507 | 1.00 | 0.00 | O |
| ATOM | 674 | OE2  | GLU | 45 | 18.752 | -3.064 | -16.197 | 1.00 | 0.00 | O |
| ATOM | 675 | H    | GLU | 45 | 14.378 | -0.105 | -14.648 | 1.00 | 0.00 | H |
| ATOM | 676 | HA   | GLU | 45 | 16.782 | -0.062 | -13.396 | 1.00 | 0.00 | H |
| ATOM | 677 | 2HB3 | GLU | 45 | 17.694 | 0.028  | -15.906 | 1.00 | 0.00 | H |
| ATOM | 678 | 2HG3 | GLU | 45 | 15.964 | -2.289 | -15.111 | 1.00 | 0.00 | H |
| ATOM | 679 | HB2  | GLU | 45 | 15.974 | -0.267 | -16.259 | 1.00 | 0.00 | H |
| ATOM | 680 | HG2  | GLU | 45 | 17.557 | -1.991 | -14.372 | 1.00 | 0.00 | H |
| ATOM | 681 | N    | ALA | 46 | 16.538 | 2.620  | -15.316 | 1.00 | 0.00 | N |
| ATOM | 682 | CA   | ALA | 46 | 17.032 | 3.981  | -15.497 | 1.00 | 0.00 | C |
| ATOM | 683 | C    | ALA | 46 | 17.019 | 4.747  | -14.179 | 1.00 | 0.00 | C |

|      |     |      |     |    |        |        |         |      |      |   |
|------|-----|------|-----|----|--------|--------|---------|------|------|---|
| ATOM | 684 | O    | ALA | 46 | 17.933 | 5.523  | -13.894 | 1.00 | 0.00 | O |
| ATOM | 685 | CB   | ALA | 46 | 16.202 | 4.709  | -16.542 | 1.00 | 0.00 | C |
| ATOM | 686 | H    | ALA | 46 | 15.855 | 2.275  | -15.928 | 1.00 | 0.00 | H |
| ATOM | 687 | HA   | ALA | 46 | 18.050 | 3.922  | -15.857 | 1.00 | 0.00 | H |
| ATOM | 688 | 1HB  | ALA | 46 | 16.690 | 4.636  | -17.503 | 1.00 | 0.00 | H |
| ATOM | 689 | 2HB  | ALA | 46 | 15.222 | 4.260  | -16.600 | 1.00 | 0.00 | H |
| ATOM | 690 | 3HB  | ALA | 46 | 16.107 | 5.749  | -16.265 | 1.00 | 0.00 | H |
| ATOM | 691 | N    | GLU | 47 | 15.980 | 4.528  | -13.380 | 1.00 | 0.00 | N |
| ATOM | 692 | CA   | GLU | 47 | 15.849 | 5.202  | -12.094 | 1.00 | 0.00 | C |
| ATOM | 693 | C    | GLU | 47 | 16.936 | 4.743  | -11.127 | 1.00 | 0.00 | C |
| ATOM | 694 | O    | GLU | 47 | 17.672 | 5.558  | -10.569 | 1.00 | 0.00 | O |
| ATOM | 695 | CB   | GLU | 47 | 14.468 | 4.934  | -11.492 | 1.00 | 0.00 | C |
| ATOM | 696 | CG   | GLU | 47 | 13.320 | 5.434  | -12.352 | 1.00 | 0.00 | C |
| ATOM | 697 | CD   | GLU | 47 | 13.069 | 6.922  | -12.182 | 1.00 | 0.00 | C |
| ATOM | 698 | OE1  | GLU | 47 | 13.808 | 7.722  | -12.793 | 1.00 | 0.00 | O |
| ATOM | 699 | OE2  | GLU | 47 | 12.134 | 7.283  | -11.438 | 1.00 | 0.00 | O |
| ATOM | 700 | H    | GLU | 47 | 15.284 | 3.899  | -13.663 | 1.00 | 0.00 | H |
| ATOM | 701 | HA   | GLU | 47 | 15.959 | 6.262  | -12.262 | 1.00 | 0.00 | H |
| ATOM | 702 | 2HB3 | GLU | 47 | 14.408 | 5.421  | -10.529 | 1.00 | 0.00 | H |
| ATOM | 703 | 2HG3 | GLU | 47 | 12.422 | 4.900  | -12.082 | 1.00 | 0.00 | H |
| ATOM | 704 | HB2  | GLU | 47 | 14.323 | 3.858  | -11.381 | 1.00 | 0.00 | H |
| ATOM | 705 | HG2  | GLU | 47 | 13.555 | 5.268  | -13.405 | 1.00 | 0.00 | H |
| ATOM | 706 | N    | LEU | 48 | 17.030 | 3.431  | -10.931 | 1.00 | 0.00 | N |
| ATOM | 707 | CA   | LEU | 48 | 18.025 | 2.862  | -10.032 | 1.00 | 0.00 | C |
| ATOM | 708 | C    | LEU | 48 | 19.434 | 3.287  | -10.436 | 1.00 | 0.00 | C |
| ATOM | 709 | O    | LEU | 48 | 20.229 | 3.712  | -9.600  | 1.00 | 0.00 | O |
| ATOM | 710 | CB   | LEU | 48 | 17.923 | 1.336  | -10.024 | 1.00 | 0.00 | C |
| ATOM | 711 | CG   | LEU | 48 | 16.611 | 0.753  | -9.500  | 1.00 | 0.00 | C |
| ATOM | 712 | CD1  | LEU | 48 | 16.362 | -0.625 | -10.093 | 1.00 | 0.00 | C |
| ATOM | 713 | CD2  | LEU | 48 | 16.627 | 0.687  | -7.981  | 1.00 | 0.00 | C |
| ATOM | 714 | H    | LEU | 48 | 16.416 | 2.831  | -11.404 | 1.00 | 0.00 | H |
| ATOM | 715 | HA   | LEU | 48 | 17.824 | 3.233  | -9.036  | 1.00 | 0.00 | H |
| ATOM | 716 | 2HB3 | LEU | 48 | 18.725 | 0.953  | -9.408  | 1.00 | 0.00 | H |
| ATOM | 717 | HG   | LEU | 48 | 15.793 | 1.397  | -9.799  | 1.00 | 0.00 | H |
| ATOM | 718 | 1HD1 | LEU | 48 | 16.732 | -1.379 | -9.416  | 1.00 | 0.00 | H |
| ATOM | 719 | 2HD1 | LEU | 48 | 16.877 | -0.707 | -11.040 | 1.00 | 0.00 | H |
| ATOM | 720 | 3HD1 | LEU | 48 | 15.303 | -0.766 | -10.247 | 1.00 | 0.00 | H |
| ATOM | 721 | 1HD2 | LEU | 48 | 17.470 | 1.247  | -7.605  | 1.00 | 0.00 | H |
| ATOM | 722 | 2HD2 | LEU | 48 | 16.711 | -0.344 | -7.664  | 1.00 | 0.00 | H |
| ATOM | 723 | 3HD2 | LEU | 48 | 15.711 | 1.107  | -7.592  | 1.00 | 0.00 | H |
| ATOM | 724 | HB2  | LEU | 48 | 18.000 | 0.962  | -11.045 | 1.00 | 0.00 | H |
| ATOM | 725 | N    | GLN | 49 | 19.732 | 3.170  | -11.726 | 1.00 | 0.00 | N |
| ATOM | 726 | CA   | GLN | 49 | 21.044 | 3.544  | -12.243 | 1.00 | 0.00 | C |
| ATOM | 727 | C    | GLN | 49 | 21.360 | 5.001  | -11.924 | 1.00 | 0.00 | C |
| ATOM | 728 | O    | GLN | 49 | 22.462 | 5.324  | -11.482 | 1.00 | 0.00 | O |
| ATOM | 729 | CB   | GLN | 49 | 21.104 | 3.317  | -13.755 | 1.00 | 0.00 | C |
| ATOM | 730 | CG   | GLN | 49 | 21.306 | 1.861  | -14.145 | 1.00 | 0.00 | C |
| ATOM | 731 | CD   | GLN | 49 | 22.772 | 1.494  | -14.279 | 1.00 | 0.00 | C |
| ATOM | 732 | OE1  | GLN | 49 | 23.277 | 1.303  | -15.387 | 1.00 | 0.00 | O |
| ATOM | 733 | NE2  | GLN | 49 | 23.463 | 1.390  | -13.150 | 1.00 | 0.00 | N |
| ATOM | 734 | H    | GLN | 49 | 19.056 | 2.824  | -12.344 | 1.00 | 0.00 | H |
| ATOM | 735 | HA   | GLN | 49 | 21.780 | 2.916  | -11.765 | 1.00 | 0.00 | H |
| ATOM | 736 | 2HB3 | GLN | 49 | 21.920 | 3.894  | -14.162 | 1.00 | 0.00 | H |
| ATOM | 737 | 2HG3 | GLN | 49 | 20.818 | 1.683  | -15.089 | 1.00 | 0.00 | H |
| ATOM | 738 | 1HE2 | GLN | 49 | 22.995 | 1.554  | -12.304 | 1.00 | 0.00 | H |
| ATOM | 739 | 2HE2 | GLN | 49 | 24.410 | 1.153  | -13.208 | 1.00 | 0.00 | H |
| ATOM | 740 | HB2  | GLN | 49 | 20.162 | 3.624  | -14.207 | 1.00 | 0.00 | H |
| ATOM | 741 | HG2  | GLN | 49 | 20.881 | 1.216  | -13.374 | 1.00 | 0.00 | H |
| ATOM | 742 | N    | ASP | 50 | 20.386 | 5.876  | -12.150 | 1.00 | 0.00 | N |
| ATOM | 743 | CA   | ASP | 50 | 20.559 | 7.299  | -11.885 | 1.00 | 0.00 | C |
| ATOM | 744 | C    | ASP | 50 | 20.850 | 7.545  | -10.407 | 1.00 | 0.00 | C |
| ATOM | 745 | O    | ASP | 50 | 21.698 | 8.367  | -10.059 | 1.00 | 0.00 | O |
| ATOM | 746 | CB   | ASP | 50 | 19.313 | 8.076  | -12.308 | 1.00 | 0.00 | C |
| ATOM | 747 | CG   | ASP | 50 | 19.359 | 8.494  | -13.764 | 1.00 | 0.00 | C |
| ATOM | 748 | OD1  | ASP | 50 | 20.329 | 9.177  | -14.155 | 1.00 | 0.00 | O |
| ATOM | 749 | OD2  | ASP | 50 | 18.424 | 8.140  | -14.514 | 1.00 | 0.00 | O |
| ATOM | 750 | H    | ASP | 50 | 19.529 | 5.557  | -12.503 | 1.00 | 0.00 | H |
| ATOM | 751 | HA   | ASP | 50 | 21.402 | 7.644  | -12.466 | 1.00 | 0.00 | H |
| ATOM | 752 | 2HB3 | ASP | 50 | 19.224 | 8.961  | -11.700 | 1.00 | 0.00 | H |
| ATOM | 753 | HB2  | ASP | 50 | 18.432 | 7.446  | -12.180 | 1.00 | 0.00 | H |
| ATOM | 754 | N    | MET | 51 | 20.139 | 6.828  | -9.542  | 1.00 | 0.00 | N |
| ATOM | 755 | CA   | MET | 51 | 20.321 | 6.969  | -8.102  | 1.00 | 0.00 | C |
| ATOM | 756 | C    | MET | 51 | 21.669 | 6.403  | -7.667  | 1.00 | 0.00 | C |
| ATOM | 757 | O    | MET | 51 | 22.336 | 6.964  | -6.796  | 1.00 | 0.00 | O |
| ATOM | 758 | CB   | MET | 51 | 19.191 | 6.260  | -7.353  | 1.00 | 0.00 | C |
| ATOM | 759 | CG   | MET | 51 | 17.869 | 7.012  | -7.398  | 1.00 | 0.00 | C |
| ATOM | 760 | SD   | MET | 51 | 16.591 | 6.228  | -6.397  | 1.00 | 0.00 | S |

|      |     |      |      |    |        |        |         |      |      |   |
|------|-----|------|------|----|--------|--------|---------|------|------|---|
| ATOM | 761 | CE   | MET  | 51 | 15.915 | 5.055  | -7.569  | 1.00 | 0.00 | C |
| ATOM | 762 | H    | MET  | 51 | 19.478 | 6.187  | -9.880  | 1.00 | 0.00 | H |
| ATOM | 763 | HA   | MET  | 51 | 20.295 | 8.023  | -7.868  | 1.00 | 0.00 | H |
| ATOM | 764 | 2HB3 | MET  | 51 | 19.479 | 6.144  | -6.318  | 1.00 | 0.00 | H |
| ATOM | 765 | 2HG3 | MET  | 51 | 17.531 | 7.054  | -8.423  | 1.00 | 0.00 | H |
| ATOM | 766 | 1HE  | MET  | 51 | 16.700 | 4.705  | -8.223  | 1.00 | 0.00 | H |
| ATOM | 767 | 2HE  | MET  | 51 | 15.492 | 4.216  | -7.036  | 1.00 | 0.00 | H |
| ATOM | 768 | 3HE  | MET  | 51 | 15.145 | 5.535  | -8.156  | 1.00 | 0.00 | H |
| ATOM | 769 | HB2  | MET  | 51 | 19.006 | 5.288  | -7.807  | 1.00 | 0.00 | H |
| ATOM | 770 | HG2  | MET  | 51 | 18.008 | 8.019  | -7.004  | 1.00 | 0.00 | H |
| ATOM | 771 | N    | I LE | 52 | 22.062 | 5.287  | -8.274  | 1.00 | 0.00 | N |
| ATOM | 772 | CA   | I LE | 52 | 23.330 | 4.648  | -7.948  | 1.00 | 0.00 | C |
| ATOM | 773 | C    | I LE | 52 | 24.508 | 5.512  | -8.379  | 1.00 | 0.00 | C |
| ATOM | 774 | O    | I LE | 52 | 25.460 | 5.706  | -7.622  | 1.00 | 0.00 | O |
| ATOM | 775 | CB   | I LE | 52 | 23.450 | 3.265  | -8.616  | 1.00 | 0.00 | C |
| ATOM | 776 | CG2  | I LE | 52 | 24.858 | 2.714  | -8.447  | 1.00 | 0.00 | C |
| ATOM | 777 | CG1  | I LE | 52 | 22.420 | 2.298  | -8.024  | 1.00 | 0.00 | C |
| ATOM | 778 | CD1  | I LE | 52 | 22.093 | 1.135  | -8.933  | 1.00 | 0.00 | C |
| ATOM | 779 | H    | I LE | 52 | 21.485 | 4.888  | -8.958  | 1.00 | 0.00 | H |
| ATOM | 780 | HA   | I LE | 52 | 23.369 | 4.513  | -6.877  | 1.00 | 0.00 | H |
| ATOM | 781 | HB   | I LE | 52 | 23.257 | 3.380  | -9.672  | 1.00 | 0.00 | H |
| ATOM | 782 | 1HG2 | I LE | 52 | 25.162 | 2.814  | -7.415  | 1.00 | 0.00 | H |
| ATOM | 783 | 2HG2 | I LE | 52 | 24.874 | 1.674  | -8.727  | 1.00 | 0.00 | H |
| ATOM | 784 | 3HG2 | I LE | 52 | 25.539 | 3.268  | -9.077  | 1.00 | 0.00 | H |
| ATOM | 785 | 2HG3 | I LE | 52 | 21.505 | 2.836  | -7.828  | 1.00 | 0.00 | H |
| ATOM | 786 | 1HD1 | I LE | 52 | 21.991 | 0.234  | -8.343  | 1.00 | 0.00 | H |
| ATOM | 787 | 2HD1 | I LE | 52 | 21.168 | 1.333  | -9.453  | 1.00 | 0.00 | H |
| ATOM | 788 | 3HD1 | I LE | 52 | 22.890 | 1.003  | -9.653  | 1.00 | 0.00 | H |
| ATOM | 789 | HG2  | I LE | 52 | 22.808 | 1.877  | -7.096  | 1.00 | 0.00 | H |
| ATOM | 790 | N    | ASN  | 53 | 24.440 | 6.030  | -9.602  | 1.00 | 0.00 | N |
| ATOM | 791 | CA   | ASN  | 53 | 25.503 | 6.875  | -10.135 | 1.00 | 0.00 | C |
| ATOM | 792 | C    | ASN  | 53 | 25.601 | 8.183  | -9.353  | 1.00 | 0.00 | C |
| ATOM | 793 | O    | ASN  | 53 | 26.694 | 8.703  | -9.130  | 1.00 | 0.00 | O |
| ATOM | 794 | CB   | ASN  | 53 | 25.252 | 7.172  | -11.616 | 1.00 | 0.00 | C |
| ATOM | 795 | CG   | ASN  | 53 | 25.687 | 6.029  | -12.514 | 1.00 | 0.00 | C |
| ATOM | 796 | OD1  | ASN  | 53 | 26.879 | 5.752  | -12.654 | 1.00 | 0.00 | O |
| ATOM | 797 | ND2  | ASN  | 53 | 24.718 | 5.361  | -13.130 | 1.00 | 0.00 | N |
| ATOM | 798 | H    | ASN  | 53 | 23.655 | 5.839  | -10.160 | 1.00 | 0.00 | H |
| ATOM | 799 | HA   | ASN  | 53 | 26.434 | 6.339  | -10.035 | 1.00 | 0.00 | H |
| ATOM | 800 | 2HB3 | ASN  | 53 | 25.803 | 8.056  | -11.899 | 1.00 | 0.00 | H |
| ATOM | 801 | 1HD2 | ASN  | 53 | 23.792 | 5.637  | -12.970 | 1.00 | 0.00 | H |
| ATOM | 802 | 2HD2 | ASN  | 53 | 24.970 | 4.618  | -13.715 | 1.00 | 0.00 | H |
| ATOM | 803 | HB2  | ASN  | 53 | 24.187 | 7.328  | -11.781 | 1.00 | 0.00 | H |
| ATOM | 804 | N    | GLU  | 54 | 24.451 | 8.707  | -8.940  | 1.00 | 0.00 | N |
| ATOM | 805 | CA   | GLU  | 54 | 24.410 | 9.952  | -8.185  | 1.00 | 0.00 | C |
| ATOM | 806 | C    | GLU  | 54 | 25.195 | 9.826  | -6.883  | 1.00 | 0.00 | C |
| ATOM | 807 | O    | GLU  | 54 | 25.897 | 10.751 | -6.475  | 1.00 | 0.00 | O |
| ATOM | 808 | CB   | GLU  | 54 | 22.962 | 10.343 | -7.883  | 1.00 | 0.00 | C |
| ATOM | 809 | CG   | GLU  | 54 | 22.290 | 11.108 | -9.011  | 1.00 | 0.00 | C |
| ATOM | 810 | CD   | GLU  | 54 | 22.722 | 12.560 | -9.072  | 1.00 | 0.00 | C |
| ATOM | 811 | OE1  | GLU  | 54 | 23.936 | 12.823 | -8.934  | 1.00 | 0.00 | O |
| ATOM | 812 | OE2  | GLU  | 54 | 21.848 | 13.432 | -9.255  | 1.00 | 0.00 | O |
| ATOM | 813 | H    | GLU  | 54 | 23.612 | 8.245  | -9.149  | 1.00 | 0.00 | H |
| ATOM | 814 | HA   | GLU  | 54 | 24.862 | 10.724 | -8.790  | 1.00 | 0.00 | H |
| ATOM | 815 | 2HB3 | GLU  | 54 | 22.946 | 10.963 | -6.998  | 1.00 | 0.00 | H |
| ATOM | 816 | 2HG3 | GLU  | 54 | 21.221 | 11.070 | -8.867  | 1.00 | 0.00 | H |
| ATOM | 817 | HB2  | GLU  | 54 | 22.367 | 9.444  | -7.726  | 1.00 | 0.00 | H |
| ATOM | 818 | HG2  | GLU  | 54 | 22.557 | 10.655 | -9.966  | 1.00 | 0.00 | H |
| ATOM | 819 | N    | VAL  | 55 | 25.073 | 8.672  | -6.234  | 1.00 | 0.00 | N |
| ATOM | 820 | CA   | VAL  | 55 | 25.772 | 8.422  | -4.978  | 1.00 | 0.00 | C |
| ATOM | 821 | C    | VAL  | 55 | 27.179 | 7.894  | -5.229  | 1.00 | 0.00 | C |
| ATOM | 822 | O    | VAL  | 55 | 28.109 | 8.191  | -4.479  | 1.00 | 0.00 | O |
| ATOM | 823 | CB   | VAL  | 55 | 25.006 | 7.415  | -4.100  | 1.00 | 0.00 | C |
| ATOM | 824 | CG1  | VAL  | 55 | 25.810 | 7.069  | -2.856  | 1.00 | 0.00 | C |
| ATOM | 825 | CG2  | VAL  | 55 | 23.638 | 7.971  | -3.724  | 1.00 | 0.00 | C |
| ATOM | 826 | H    | VAL  | 55 | 24.499 | 7.973  | -6.609  | 1.00 | 0.00 | H |
| ATOM | 827 | HA   | VAL  | 55 | 25.839 | 9.357  | -4.443  | 1.00 | 0.00 | H |
| ATOM | 828 | HB   | VAL  | 55 | 24.858 | 6.511  | -4.671  | 1.00 | 0.00 | H |
| ATOM | 829 | 1HG1 | VAL  | 55 | 25.237 | 7.320  | -1.976  | 1.00 | 0.00 | H |
| ATOM | 830 | 2HG1 | VAL  | 55 | 26.035 | 6.013  | -2.856  | 1.00 | 0.00 | H |
| ATOM | 831 | 3HG1 | VAL  | 55 | 26.730 | 7.634  | -2.858  | 1.00 | 0.00 | H |
| ATOM | 832 | 1HG2 | VAL  | 55 | 23.684 | 8.391  | -2.729  | 1.00 | 0.00 | H |
| ATOM | 833 | 2HG2 | VAL  | 55 | 23.356 | 8.740  | -4.428  | 1.00 | 0.00 | H |
| ATOM | 834 | 3HG2 | VAL  | 55 | 22.909 | 7.175  | -3.746  | 1.00 | 0.00 | H |
| ATOM | 835 | N    | ASP  | 56 | 27.329 | 7.105  | -6.288  | 1.00 | 0.00 | N |
| ATOM | 836 | CA   | ASP  | 56 | 28.626 | 6.534  | -6.639  | 1.00 | 0.00 | C |
| ATOM | 837 | C    | ASP  | 56 | 29.703 | 7.613  | -6.666  | 1.00 | 0.00 | C |

|      |     |      |      |    |        |        |         |      |      |   |
|------|-----|------|------|----|--------|--------|---------|------|------|---|
| ATOM | 838 | O    | ASP  | 56 | 29.641 | 8.548  | -7.463  | 1.00 | 0.00 | O |
| ATOM | 839 | CB   | ASP  | 56 | 28.547 | 5.839  | -7.999  | 1.00 | 0.00 | C |
| ATOM | 840 | CG   | ASP  | 56 | 29.612 | 4.773  | -8.166  | 1.00 | 0.00 | C |
| ATOM | 841 | OD1  | ASP  | 56 | 29.579 | 3.778  | -7.412  | 1.00 | 0.00 | O |
| ATOM | 842 | OD2  | ASP  | 56 | 30.480 | 4.935  | -9.049  | 1.00 | 0.00 | O |
| ATOM | 843 | H    | ASP  | 56 | 26.551 | 6.903  | -6.849  | 1.00 | 0.00 | H |
| ATOM | 844 | HA   | ASP  | 56 | 28.881 | 5.806  | -5.885  | 1.00 | 0.00 | H |
| ATOM | 845 | 2HB3 | ASP  | 56 | 28.674 | 6.574  | -8.780  | 1.00 | 0.00 | H |
| ATOM | 846 | HB2  | ASP  | 56 | 27.578 | 5.350  | -8.103  | 1.00 | 0.00 | H |
| ATOM | 847 | N    | ALA  | 57 | 30.692 | 7.476  | -5.787  | 1.00 | 0.00 | N |
| ATOM | 848 | CA   | ALA  | 57 | 31.784 | 8.437  | -5.711  | 1.00 | 0.00 | C |
| ATOM | 849 | C    | ALA  | 57 | 33.110 | 7.790  | -6.100  | 1.00 | 0.00 | C |
| ATOM | 850 | O    | ALA  | 57 | 33.819 | 8.286  | -6.977  | 1.00 | 0.00 | O |
| ATOM | 851 | CB   | ALA  | 57 | 31.873 | 9.025  | -4.309  | 1.00 | 0.00 | C |
| ATOM | 852 | H    | ALA  | 57 | 30.686 | 6.709  | -5.177  | 1.00 | 0.00 | H |
| ATOM | 853 | HA   | ALA  | 57 | 31.571 | 9.239  | -6.400  | 1.00 | 0.00 | H |
| ATOM | 854 | 1HB  | ALA  | 57 | 32.777 | 8.678  | -3.831  | 1.00 | 0.00 | H |
| ATOM | 855 | 2HB  | ALA  | 57 | 31.888 | 10.103 | -4.373  | 1.00 | 0.00 | H |
| ATOM | 856 | 3HB  | ALA  | 57 | 31.017 | 8.710  | -3.733  | 1.00 | 0.00 | H |
| ATOM | 857 | N    | ASP  | 58 | 33.442 | 6.687  | -5.442  | 1.00 | 0.00 | N |
| ATOM | 858 | CA   | ASP  | 58 | 34.684 | 5.974  | -5.718  | 1.00 | 0.00 | C |
| ATOM | 859 | C    | ASP  | 58 | 34.967 | 5.939  | -7.216  | 1.00 | 0.00 | C |
| ATOM | 860 | O    | ASP  | 58 | 36.092 | 6.177  | -7.652  | 1.00 | 0.00 | O |
| ATOM | 861 | CB   | ASP  | 58 | 34.612 | 4.549  | -5.168  | 1.00 | 0.00 | C |
| ATOM | 862 | CG   | ASP  | 58 | 33.705 | 3.655  | -5.991  | 1.00 | 0.00 | C |
| ATOM | 863 | OD1  | ASP  | 58 | 32.649 | 4.138  | -6.444  | 1.00 | 0.00 | O |
| ATOM | 864 | OD2  | ASP  | 58 | 34.053 | 2.469  | -6.178  | 1.00 | 0.00 | O |
| ATOM | 865 | H    | ASP  | 58 | 32.835 | 6.341  | -4.752  | 1.00 | 0.00 | H |
| ATOM | 866 | HA   | ASP  | 58 | 35.486 | 6.501  | -5.225  | 1.00 | 0.00 | H |
| ATOM | 867 | 2HB3 | ASP  | 58 | 34.235 | 4.580  | -4.156  | 1.00 | 0.00 | H |
| ATOM | 868 | HB2  | ASP  | 58 | 35.605 | 4.101  | -5.183  | 1.00 | 0.00 | H |
| ATOM | 869 | N    | GLY  | 59 | 33.935 | 5.639  | -8.003  | 1.00 | 0.00 | N |
| ATOM | 870 | CA   | GLY  | 59 | 34.096 | 5.579  | -9.444  | 1.00 | 0.00 | C |
| ATOM | 871 | C    | GLY  | 59 | 34.101 | 4.156  | -9.966  | 1.00 | 0.00 | C |
| ATOM | 872 | O    | GLY  | 59 | 34.862 | 3.826  | -10.877 | 1.00 | 0.00 | O |
| ATOM | 873 | H    | GLY  | 59 | 33.062 | 5.459  | -7.600  | 1.00 | 0.00 | H |
| ATOM | 874 | 2HA  | GLY  | 59 | 33.284 | 6.118  | -9.907  | 1.00 | 0.00 | H |
| ATOM | 875 | 3HA  | GLY  | 59 | 35.029 | 6.052  | -9.712  | 1.00 | 0.00 | H |
| ATOM | 876 | N    | ASN  | 60 | 33.254 | 3.312  | -9.388  | 1.00 | 0.00 | N |
| ATOM | 877 | CA   | ASN  | 60 | 33.165 | 1.915  | -9.800  | 1.00 | 0.00 | C |
| ATOM | 878 | C    | ASN  | 60 | 31.796 | 1.610  | -10.401 | 1.00 | 0.00 | C |
| ATOM | 879 | O    | ASN  | 60 | 31.695 | 0.994  | -11.461 | 1.00 | 0.00 | O |
| ATOM | 880 | CB   | ASN  | 60 | 33.430 | 0.992  | -8.609  | 1.00 | 0.00 | C |
| ATOM | 881 | CG   | ASN  | 60 | 32.248 | 0.921  | -7.661  | 1.00 | 0.00 | C |
| ATOM | 882 | OD1  | ASN  | 60 | 31.776 | 1.942  | -7.161  | 1.00 | 0.00 | O |
| ATOM | 883 | ND2  | ASN  | 60 | 31.766 | -0.289 | -7.406  | 1.00 | 0.00 | N |
| ATOM | 884 | H    | ASN  | 60 | 32.673 | 3.635  | -8.667  | 1.00 | 0.00 | H |
| ATOM | 885 | HA   | ASN  | 60 | 33.923 | 1.743  | -10.552 | 1.00 | 0.00 | H |
| ATOM | 886 | 2HB3 | ASN  | 60 | 34.287 | 1.358  | -8.062  | 1.00 | 0.00 | H |
| ATOM | 887 | 1HD2 | ASN  | 60 | 32.194 | -1.058 | -7.840  | 1.00 | 0.00 | H |
| ATOM | 888 | 2HD2 | ASN  | 60 | 31.003 | -0.365 | -6.798  | 1.00 | 0.00 | H |
| ATOM | 889 | HB2  | ASN  | 60 | 33.620 | -0.018 | -8.967  | 1.00 | 0.00 | H |
| ATOM | 890 | N    | GLY  | 61 | 30.746 | 2.048  | -9.715  | 1.00 | 0.00 | N |
| ATOM | 891 | CA   | GLY  | 61 | 29.395 | 1.813  | -10.195 | 1.00 | 0.00 | C |
| ATOM | 892 | C    | GLY  | 61 | 28.431 | 1.475  | -9.076  | 1.00 | 0.00 | C |
| ATOM | 893 | O    | GLY  | 61 | 27.400 | 2.128  | -8.916  | 1.00 | 0.00 | O |
| ATOM | 894 | H    | GLY  | 61 | 30.887 | 2.533  | -8.875  | 1.00 | 0.00 | H |
| ATOM | 895 | 2HA  | GLY  | 61 | 29.046 | 2.698  | -10.705 | 1.00 | 0.00 | H |
| ATOM | 896 | 3HA  | GLY  | 61 | 29.415 | 0.991  | -10.898 | 1.00 | 0.00 | H |
| ATOM | 897 | N    | THR  | 62 | 28.766 | 0.452  | -8.296  | 1.00 | 0.00 | N |
| ATOM | 898 | CA   | THR  | 62 | 27.921 | 0.029  | -7.187  | 1.00 | 0.00 | C |
| ATOM | 899 | C    | THR  | 62 | 28.230 | 0.827  | -5.924  | 1.00 | 0.00 | C |
| ATOM | 900 | O    | THR  | 62 | 29.391 | 1.006  | -5.560  | 1.00 | 0.00 | O |
| ATOM | 901 | CB   | THR  | 62 | 28.099 | -1.471 | -6.887  | 1.00 | 0.00 | C |
| ATOM | 902 | OG1  | THR  | 62 | 29.467 | -1.750 | -6.566  | 1.00 | 0.00 | O |
| ATOM | 903 | CG2  | THR  | 62 | 27.673 | -2.315 | -8.079  | 1.00 | 0.00 | C |
| ATOM | 904 | H    | THR  | 62 | 29.603 | -0.028 | -8.472  | 1.00 | 0.00 | H |
| ATOM | 905 | HA   | THR  | 62 | 26.892 | 0.199  | -7.469  | 1.00 | 0.00 | H |
| ATOM | 906 | HB   | THR  | 62 | 27.478 | -1.731 | -6.042  | 1.00 | 0.00 | H |
| ATOM | 907 | 1HG  | THR  | 62 | 29.817 | -2.391 | -7.187  | 1.00 | 0.00 | H |
| ATOM | 908 | 1HG2 | THR  | 62 | 26.597 | -2.414 | -8.085  | 1.00 | 0.00 | H |
| ATOM | 909 | 2HG2 | THR  | 62 | 28.123 | -3.296 | -8.007  | 1.00 | 0.00 | H |
| ATOM | 910 | 3HG2 | THR  | 62 | 27.994 | -1.838 | -8.990  | 1.00 | 0.00 | H |
| ATOM | 911 | N    | I LE | 63 | 27.180 | 1.304  | -5.262  | 1.00 | 0.00 | N |
| ATOM | 912 | CA   | I LE | 63 | 27.339 | 2.081  | -4.040  | 1.00 | 0.00 | C |
| ATOM | 913 | C    | I LE | 63 | 28.191 | 1.334  | -3.020  | 1.00 | 0.00 | C |
| ATOM | 914 | O    | I LE | 63 | 28.183 | 0.104  | -2.972  | 1.00 | 0.00 | O |

|      |     |      |     |    |        |        |        |      |      |   |
|------|-----|------|-----|----|--------|--------|--------|------|------|---|
| ATOM | 915 | CB   | ILE | 63 | 25.976 | 2.421  | -3.408 | 1.00 | 0.00 | C |
| ATOM | 916 | CG2  | ILE | 63 | 26.174 | 3.203  | -2.117 | 1.00 | 0.00 | C |
| ATOM | 917 | CG1  | ILE | 63 | 25.115 | 3.214  | -4.392 | 1.00 | 0.00 | C |
| ATOM | 918 | CD1  | ILE | 63 | 24.067 | 2.374  | -5.089 | 1.00 | 0.00 | C |
| ATOM | 919 | H    | ILE | 63 | 26.280 | 1.129  | -5.603 | 1.00 | 0.00 | H |
| ATOM | 920 | HA   | ILE | 63 | 27.835 | 3.007  | -4.297 | 1.00 | 0.00 | H |
| ATOM | 921 | HB   | ILE | 63 | 25.477 | 1.495  | -3.165 | 1.00 | 0.00 | H |
| ATOM | 922 | 1HG2 | ILE | 63 | 25.218 | 3.343  | -1.633 | 1.00 | 0.00 | H |
| ATOM | 923 | 2HG2 | ILE | 63 | 26.833 | 2.657  | -1.462 | 1.00 | 0.00 | H |
| ATOM | 924 | 3HG2 | ILE | 63 | 26.606 | 4.167  | -2.344 | 1.00 | 0.00 | H |
| ATOM | 925 | 2HG3 | ILE | 63 | 25.753 | 3.645  | -5.151 | 1.00 | 0.00 | H |
| ATOM | 926 | 1HD1 | ILE | 63 | 24.538 | 1.766  | -5.847 | 1.00 | 0.00 | H |
| ATOM | 927 | 2HD1 | ILE | 63 | 23.578 | 1.738  | -4.367 | 1.00 | 0.00 | H |
| ATOM | 928 | 3HD1 | ILE | 63 | 23.337 | 3.024  | -5.551 | 1.00 | 0.00 | H |
| ATOM | 929 | HG2  | ILE | 63 | 24.585 | 4.002  | -3.859 | 1.00 | 0.00 | H |
| ATOM | 930 | N    | ASP | 64 | 28.922 | 2.084  | -2.203 | 1.00 | 0.00 | N |
| ATOM | 931 | CA   | ASP | 64 | 29.775 | 1.492  | -1.180 | 1.00 | 0.00 | C |
| ATOM | 932 | C    | ASP | 64 | 29.285 | 1.861  | 0.216  | 1.00 | 0.00 | C |
| ATOM | 933 | O    | ASP | 64 | 28.241 | 2.494  | 0.373  | 1.00 | 0.00 | O |
| ATOM | 934 | CB   | ASP | 64 | 31.223 | 1.953  | -1.364 | 1.00 | 0.00 | C |
| ATOM | 935 | CG   | ASP | 64 | 31.711 | 1.767  | -2.786 | 1.00 | 0.00 | C |
| ATOM | 936 | OD1  | ASP | 64 | 31.012 | 1.094  | -3.572 | 1.00 | 0.00 | O |
| ATOM | 937 | OD2  | ASP | 64 | 32.796 | 2.296  | -3.116 | 1.00 | 0.00 | O |
| ATOM | 938 | H    | ASP | 64 | 28.884 | 3.060  | -2.289 | 1.00 | 0.00 | H |
| ATOM | 939 | HA   | ASP | 64 | 29.732 | 0.420  | -1.292 | 1.00 | 0.00 | H |
| ATOM | 940 | 2HB3 | ASP | 64 | 31.861 | 1.384  | -0.705 | 1.00 | 0.00 | H |
| ATOM | 941 | HB2  | ASP | 64 | 31.299 | 3.015  | -1.130 | 1.00 | 0.00 | H |
| ATOM | 942 | N    | PHE | 65 | 30.045 | 1.459  | 1.230  | 1.00 | 0.00 | N |
| ATOM | 943 | CA   | PHE | 65 | 29.688 | 1.743  | 2.615  | 1.00 | 0.00 | C |
| ATOM | 944 | C    | PHE | 65 | 29.653 | 3.248  | 2.870  | 1.00 | 0.00 | C |
| ATOM | 945 | O    | PHE | 65 | 28.695 | 3.790  | 3.421  | 1.00 | 0.00 | O |
| ATOM | 946 | CB   | PHE | 65 | 30.680 | 1.076  | 3.569  | 1.00 | 0.00 | C |
| ATOM | 947 | CG   | PHE | 65 | 30.077 | 0.691  | 4.890  | 1.00 | 0.00 | C |
| ATOM | 948 | CD1  | PHE | 65 | 29.377 | 1.620  | 5.643  | 1.00 | 0.00 | C |
| ATOM | 949 | CE1  | PHE | 65 | 28.821 | 1.270  | 6.860  | 1.00 | 0.00 | C |
| ATOM | 950 | CZ   | PHE | 65 | 28.959 | -0.020 | 7.333  | 1.00 | 0.00 | C |
| ATOM | 951 | CE2  | PHE | 65 | 29.654 | -0.955 | 6.591  | 1.00 | 0.00 | C |
| ATOM | 952 | CD2  | PHE | 65 | 30.208 | -0.598 | 5.377  | 1.00 | 0.00 | C |
| ATOM | 953 | H    | PHE | 65 | 30.867 | 0.956  | 1.044  | 1.00 | 0.00 | H |
| ATOM | 954 | HA   | PHE | 65 | 28.703 | 1.339  | 2.791  | 1.00 | 0.00 | H |
| ATOM | 955 | 2HB3 | PHE | 65 | 31.496 | 1.757  | 3.762  | 1.00 | 0.00 | H |
| ATOM | 956 | 1HD  | PHE | 65 | 29.268 | 2.630  | 5.273  | 1.00 | 0.00 | H |
| ATOM | 957 | 1HE  | PHE | 65 | 28.279 | 2.002  | 7.438  | 1.00 | 0.00 | H |
| ATOM | 958 | HZ   | PHE | 65 | 28.526 | -0.297 | 8.281  | 1.00 | 0.00 | H |
| ATOM | 959 | 2HE  | PHE | 65 | 29.764 | -1.964 | 6.958  | 1.00 | 0.00 | H |
| ATOM | 960 | 2HD  | PHE | 65 | 30.750 | -1.331 | 4.797  | 1.00 | 0.00 | H |
| ATOM | 961 | HB2  | PHE | 65 | 31.058 | 0.159  | 3.118  | 1.00 | 0.00 | H |
| ATOM | 962 | N    | PRO | 66 | 30.725 | 3.942  | 2.456  | 1.00 | 0.00 | N |
| ATOM | 963 | CA   | PRO | 66 | 30.842 | 5.392  | 2.626  | 1.00 | 0.00 | C |
| ATOM | 964 | C    | PRO | 66 | 29.878 | 6.162  | 1.732  | 1.00 | 0.00 | C |
| ATOM | 965 | O    | PRO | 66 | 29.143 | 7.031  | 2.201  | 1.00 | 0.00 | O |
| ATOM | 966 | CD   | PRO | 66 | 31.903 | 3.362  | 1.790  | 1.00 | 0.00 | C |
| ATOM | 967 | CB   | PRO | 66 | 32.291 | 5.680  | 2.226  | 1.00 | 0.00 | C |
| ATOM | 968 | CG   | PRO | 66 | 32.656 | 4.570  | 1.303  | 1.00 | 0.00 | C |
| ATOM | 969 | HA   | PRO | 66 | 30.689 | 5.685  | 3.656  | 1.00 | 0.00 | H |
| ATOM | 970 | 2HB3 | PRO | 66 | 32.919 | 5.685  | 3.103  | 1.00 | 0.00 | H |
| ATOM | 971 | 2HG3 | PRO | 66 | 33.720 | 4.390  | 1.347  | 1.00 | 0.00 | H |
| ATOM | 972 | 2HD3 | PRO | 66 | 32.503 | 2.802  | 2.490  | 1.00 | 0.00 | H |
| ATOM | 973 | HD2  | PRO | 66 | 31.581 | 2.739  | 0.956  | 1.00 | 0.00 | H |
| ATOM | 974 | HB2  | PRO | 66 | 32.346 | 6.656  | 1.739  | 1.00 | 0.00 | H |
| ATOM | 975 | HG2  | PRO | 66 | 32.343 | 4.807  | 0.285  | 1.00 | 0.00 | H |
| ATOM | 976 | N    | GLU | 67 | 29.884 | 5.838  | 0.444  | 1.00 | 0.00 | N |
| ATOM | 977 | CA   | GLU | 67 | 29.011 | 6.498  | -0.516 | 1.00 | 0.00 | C |
| ATOM | 978 | C    | GLU | 67 | 27.548 | 6.356  | -0.107 | 1.00 | 0.00 | C |
| ATOM | 979 | O    | GLU | 67 | 26.789 | 7.325  | -0.121 | 1.00 | 0.00 | O |
| ATOM | 980 | CB   | GLU | 67 | 29.218 | 5.917  | -1.916 | 1.00 | 0.00 | C |
| ATOM | 981 | CG   | GLU | 67 | 30.672 | 5.898  | -2.357 | 1.00 | 0.00 | C |
| ATOM | 982 | CD   | GLU | 67 | 30.899 | 5.035  | -3.581 | 1.00 | 0.00 | C |
| ATOM | 983 | OE1  | GLU | 67 | 29.909 | 4.717  | -4.275 | 1.00 | 0.00 | O |
| ATOM | 984 | OE2  | GLU | 67 | 32.065 | 4.677  | -3.849 | 1.00 | 0.00 | O |
| ATOM | 985 | H    | GLU | 67 | 30.493 | 5.134  | 0.132  | 1.00 | 0.00 | H |
| ATOM | 986 | HA   | GLU | 67 | 29.266 | 7.548  | -0.530 | 1.00 | 0.00 | H |
| ATOM | 987 | 2HB3 | GLU | 67 | 28.657 | 6.509  | -2.625 | 1.00 | 0.00 | H |
| ATOM | 988 | 2HG3 | GLU | 67 | 31.275 | 5.512  | -1.547 | 1.00 | 0.00 | H |
| ATOM | 989 | HB2  | GLU | 67 | 28.878 | 4.882  | -1.934 | 1.00 | 0.00 | H |
| ATOM | 990 | HG2  | GLU | 67 | 30.990 | 6.910  | -2.609 | 1.00 | 0.00 | H |
| ATOM | 991 | N    | PHE | 68 | 27.157 | 5.139  | 0.256  | 1.00 | 0.00 | N |

|      |      |      |     |    |        |        |        |      |      |   |
|------|------|------|-----|----|--------|--------|--------|------|------|---|
| ATOM | 992  | CA   | PHE | 68 | 25.783 | 4.867  | 0.668  | 1.00 | 0.00 | C |
| ATOM | 993  | C    | PHE | 68 | 25.297 | 5.916  | 1.665  | 1.00 | 0.00 | C |
| ATOM | 994  | O    | PHE | 68 | 24.196 | 6.450  | 1.532  | 1.00 | 0.00 | O |
| ATOM | 995  | CB   | PHE | 68 | 25.682 | 3.471  | 1.287  | 1.00 | 0.00 | C |
| ATOM | 996  | CG   | PHE | 68 | 24.386 | 3.229  | 2.008  | 1.00 | 0.00 | C |
| ATOM | 997  | CD1  | PHE | 68 | 23.218 | 2.991  | 1.300  | 1.00 | 0.00 | C |
| ATOM | 998  | CE1  | PHE | 68 | 22.024 | 2.767  | 1.957  | 1.00 | 0.00 | C |
| ATOM | 999  | CZ   | PHE | 68 | 21.988 | 2.780  | 3.340  | 1.00 | 0.00 | C |
| ATOM | 1000 | CE2  | PHE | 68 | 23.144 | 3.015  | 4.057  | 1.00 | 0.00 | C |
| ATOM | 1001 | CD2  | PHE | 68 | 24.334 | 3.240  | 3.393  | 1.00 | 0.00 | C |
| ATOM | 1002 | H    | PHE | 68 | 27.807 | 4.405  | 0.247  | 1.00 | 0.00 | H |
| ATOM | 1003 | HA   | PHE | 68 | 25.160 | 4.908  | -0.213 | 1.00 | 0.00 | H |
| ATOM | 1004 | 2HB3 | PHE | 68 | 26.485 | 3.341  | 1.996  | 1.00 | 0.00 | H |
| ATOM | 1005 | 1HD  | PHE | 68 | 23.248 | 2.980  | 0.218  | 1.00 | 0.00 | H |
| ATOM | 1006 | 1HE  | PHE | 68 | 21.124 | 2.582  | 1.394  | 1.00 | 0.00 | H |
| ATOM | 1007 | HZ   | PHE | 68 | 21.054 | 2.604  | 3.857  | 1.00 | 0.00 | H |
| ATOM | 1008 | 2HE  | PHE | 68 | 23.116 | 3.026  | 5.136  | 1.00 | 0.00 | H |
| ATOM | 1009 | 2HD  | PHE | 68 | 25.238 | 3.424  | 3.955  | 1.00 | 0.00 | H |
| ATOM | 1010 | HB2  | PHE | 68 | 25.755 | 2.720  | 0.502  | 1.00 | 0.00 | H |
| ATOM | 1011 | N    | LEU | 69 | 26.125 | 6.205  | 2.662  | 1.00 | 0.00 | N |
| ATOM | 1012 | CA   | LEU | 69 | 25.781 | 7.189  | 3.682  | 1.00 | 0.00 | C |
| ATOM | 1013 | C    | LEU | 69 | 25.237 | 8.464  | 3.046  | 1.00 | 0.00 | C |
| ATOM | 1014 | O    | LEU | 69 | 24.401 | 9.155  | 3.630  | 1.00 | 0.00 | O |
| ATOM | 1015 | CB   | LEU | 69 | 27.005 | 7.516  | 4.539  | 1.00 | 0.00 | C |
| ATOM | 1016 | CG   | LEU | 69 | 27.733 | 6.317  | 5.154  | 1.00 | 0.00 | C |
| ATOM | 1017 | CD1  | LEU | 69 | 28.979 | 6.773  | 5.896  | 1.00 | 0.00 | C |
| ATOM | 1018 | CD2  | LEU | 69 | 26.804 | 5.554  | 6.087  | 1.00 | 0.00 | C |
| ATOM | 1019 | H    | LEU | 69 | 26.991 | 5.747  | 2.712  | 1.00 | 0.00 | H |
| ATOM | 1020 | HA   | LEU | 69 | 25.016 | 6.760  | 4.311  | 1.00 | 0.00 | H |
| ATOM | 1021 | 2HB3 | LEU | 69 | 26.682 | 8.157  | 5.344  | 1.00 | 0.00 | H |
| ATOM | 1022 | HG   | LEU | 69 | 28.040 | 5.646  | 4.365  | 1.00 | 0.00 | H |
| ATOM | 1023 | 1HD1 | LEU | 69 | 29.754 | 7.011  | 5.183  | 1.00 | 0.00 | H |
| ATOM | 1024 | 2HD1 | LEU | 69 | 29.321 | 5.982  | 6.547  | 1.00 | 0.00 | H |
| ATOM | 1025 | 3HD1 | LEU | 69 | 28.748 | 7.649  | 6.485  | 1.00 | 0.00 | H |
| ATOM | 1026 | 1HD2 | LEU | 69 | 25.960 | 6.178  | 6.347  | 1.00 | 0.00 | H |
| ATOM | 1027 | 2HD2 | LEU | 69 | 27.340 | 5.283  | 6.987  | 1.00 | 0.00 | H |
| ATOM | 1028 | 3HD2 | LEU | 69 | 26.453 | 4.660  | 5.594  | 1.00 | 0.00 | H |
| ATOM | 1029 | HB2  | LEU | 69 | 27.761 | 8.006  | 3.924  | 1.00 | 0.00 | H |
| ATOM | 1030 | N    | THR | 70 | 25.715 | 8.770  | 1.844  | 1.00 | 0.00 | N |
| ATOM | 1031 | CA   | THR | 70 | 25.276 | 9.962  | 1.127  | 1.00 | 0.00 | C |
| ATOM | 1032 | C    | THR | 70 | 23.798 | 9.875  | 0.770  | 1.00 | 0.00 | C |
| ATOM | 1033 | O    | THR | 70 | 23.040 | 10.821 | 0.986  | 1.00 | 0.00 | O |
| ATOM | 1034 | CB   | THR | 70 | 26.093 | 10.176 | -0.161 | 1.00 | 0.00 | C |
| ATOM | 1035 | OG1  | THR | 70 | 27.477 | 10.350 | 0.159  | 1.00 | 0.00 | O |
| ATOM | 1036 | CG2  | THR | 70 | 25.589 | 11.389 | -0.926 | 1.00 | 0.00 | C |
| ATOM | 1037 | H    | THR | 70 | 26.379 | 8.181  | 1.430  | 1.00 | 0.00 | H |
| ATOM | 1038 | HA   | THR | 70 | 25.432 | 10.815 | 1.773  | 1.00 | 0.00 | H |
| ATOM | 1039 | HB   | THR | 70 | 25.984 | 9.301  | -0.787 | 1.00 | 0.00 | H |
| ATOM | 1040 | 1HG  | THR | 70 | 27.708 | 9.785  | 0.900  | 1.00 | 0.00 | H |
| ATOM | 1041 | 1HG2 | THR | 70 | 25.717 | 11.225 | -1.986 | 1.00 | 0.00 | H |
| ATOM | 1042 | 2HG2 | THR | 70 | 26.146 | 12.262 | -0.626 | 1.00 | 0.00 | H |
| ATOM | 1043 | 3HG2 | THR | 70 | 24.542 | 11.539 | -0.711 | 1.00 | 0.00 | H |
| ATOM | 1044 | N    | MET | 71 | 23.393 | 8.735  | 0.221  | 1.00 | 0.00 | N |
| ATOM | 1045 | CA   | MET | 71 | 22.000 | 8.525  | -0.164 | 1.00 | 0.00 | C |
| ATOM | 1046 | C    | MET | 71 | 21.084 | 8.595  | 1.053  | 1.00 | 0.00 | C |
| ATOM | 1047 | O    | MET | 71 | 20.163 | 9.412  | 1.100  | 1.00 | 0.00 | O |
| ATOM | 1048 | CB   | MET | 71 | 21.841 | 7.172  | -0.859 | 1.00 | 0.00 | C |
| ATOM | 1049 | CG   | MET | 71 | 20.413 | 6.872  | -1.285 | 1.00 | 0.00 | C |
| ATOM | 1050 | SD   | MET | 71 | 20.216 | 5.200  | -1.933 | 1.00 | 0.00 | S |
| ATOM | 1051 | CE   | MET | 71 | 20.477 | 4.230  | -0.448 | 1.00 | 0.00 | C |
| ATOM | 1052 | H    | MET | 71 | 24.043 | 8.016  | 0.072  | 1.00 | 0.00 | H |
| ATOM | 1053 | HA   | MET | 71 | 21.727 | 9.309  | -0.853 | 1.00 | 0.00 | H |
| ATOM | 1054 | 2HB3 | MET | 71 | 22.165 | 6.393  | -0.186 | 1.00 | 0.00 | H |
| ATOM | 1055 | 2HG3 | MET | 71 | 20.125 | 7.577  | -2.050 | 1.00 | 0.00 | H |
| ATOM | 1056 | 1HE  | MET | 71 | 21.536 | 4.092  | -0.289 | 1.00 | 0.00 | H |
| ATOM | 1057 | 2HE  | MET | 71 | 20.050 | 4.747  | 0.399  | 1.00 | 0.00 | H |
| ATOM | 1058 | 3HE  | MET | 71 | 20.000 | 3.266  | -0.560 | 1.00 | 0.00 | H |
| ATOM | 1059 | HB2  | MET | 71 | 22.442 | 7.158  | -1.770 | 1.00 | 0.00 | H |
| ATOM | 1060 | HG2  | MET | 71 | 19.752 | 6.957  | -0.424 | 1.00 | 0.00 | H |
| ATOM | 1061 | N    | MET | 72 | 21.341 | 7.738  | 2.032  | 1.00 | 0.00 | N |
| ATOM | 1062 | CA   | MET | 72 | 20.537 | 7.705  | 3.250  | 1.00 | 0.00 | C |
| ATOM | 1063 | C    | MET | 72 | 20.165 | 9.115  | 3.693  | 1.00 | 0.00 | C |
| ATOM | 1064 | O    | MET | 72 | 19.175 | 9.312  | 4.399  | 1.00 | 0.00 | O |
| ATOM | 1065 | CB   | MET | 72 | 21.295 | 6.989  | 4.369  | 1.00 | 0.00 | C |
| ATOM | 1066 | CG   | MET | 72 | 21.198 | 5.473  | 4.296  | 1.00 | 0.00 | C |
| ATOM | 1067 | SD   | MET | 72 | 21.283 | 4.694  | 5.921  | 1.00 | 0.00 | S |
| ATOM | 1068 | CE   | MET | 72 | 19.675 | 5.121  | 6.584  | 1.00 | 0.00 | C |



|      |      |      |     |    |        |        |        |      |      |   |
|------|------|------|-----|----|--------|--------|--------|------|------|---|
| ATOM | 1069 | H    | MET | 72 | 22.088 | 7.111  | 1.937  | 1.00 | 0.00 | H |
| ATOM | 1070 | HA   | MET | 72 | 19.631 | 7.155  | 3.033  | 1.00 | 0.00 | H |
| ATOM | 1071 | 2HB3 | MET | 72 | 20.897 | 7.308  | 5.319  | 1.00 | 0.00 | H |
| ATOM | 1072 | 2HG3 | MET | 72 | 22.012 | 5.103  | 3.690  | 1.00 | 0.00 | H |
| ATOM | 1073 | 1HE  | MET | 72 | 19.435 | 6.140  | 6.319  | 1.00 | 0.00 | H |
| ATOM | 1074 | 2HE  | MET | 72 | 18.929 | 4.456  | 6.175  | 1.00 | 0.00 | H |
| ATOM | 1075 | 3HE  | MET | 72 | 19.695 | 5.024  | 7.661  | 1.00 | 0.00 | H |
| ATOM | 1076 | HB2  | MET | 72 | 22.355 | 7.232  | 4.302  | 1.00 | 0.00 | H |
| ATOM | 1077 | HG2  | MET | 72 | 20.242 | 5.190  | 3.857  | 1.00 | 0.00 | H |
| ATOM | 1078 | N    | ALA | 73 | 20.961 | 10.092 | 3.276  | 1.00 | 0.00 | N |
| ATOM | 1079 | CA   | ALA | 73 | 20.715 | 11.484 | 3.629  | 1.00 | 0.00 | C |
| ATOM | 1080 | C    | ALA | 73 | 19.676 | 12.109 | 2.702  | 1.00 | 0.00 | C |
| ATOM | 1081 | O    | ALA | 73 | 18.728 | 12.748 | 3.161  | 1.00 | 0.00 | O |
| ATOM | 1082 | CB   | ALA | 73 | 22.010 | 12.280 | 3.583  | 1.00 | 0.00 | C |
| ATOM | 1083 | H    | ALA | 73 | 21.735 | 9.871  | 2.716  | 1.00 | 0.00 | H |
| ATOM | 1084 | HA   | ALA | 73 | 20.341 | 11.509 | 4.643  | 1.00 | 0.00 | H |
| ATOM | 1085 | 1HB  | ALA | 73 | 22.810 | 11.644 | 3.227  | 1.00 | 0.00 | H |
| ATOM | 1086 | 2HB  | ALA | 73 | 21.895 | 13.119 | 2.914  | 1.00 | 0.00 | H |
| ATOM | 1087 | 3HB  | ALA | 73 | 22.248 | 12.637 | 4.573  | 1.00 | 0.00 | H |
| ATOM | 1088 | N    | ARG | 74 | 19.861 | 11.922 | 1.401  | 1.00 | 0.00 | N |
| ATOM | 1089 | CA   | ARG | 74 | 18.940 | 12.469 | 0.411  | 1.00 | 0.00 | C |
| ATOM | 1090 | C    | ARG | 74 | 17.665 | 11.635 | 0.336  | 1.00 | 0.00 | C |
| ATOM | 1091 | O    | ARG | 74 | 16.575 | 12.166 | 0.121  | 1.00 | 0.00 | O |
| ATOM | 1092 | CB   | ARG | 74 | 19.609 | 12.521 | -0.963 | 1.00 | 0.00 | C |
| ATOM | 1093 | CG   | ARG | 74 | 20.922 | 13.288 | -0.975 | 1.00 | 0.00 | C |
| ATOM | 1094 | CD   | ARG | 74 | 21.891 | 12.719 | -1.999 | 1.00 | 0.00 | C |
| ATOM | 1095 | NE   | ARG | 74 | 21.780 | 13.391 | -3.289 | 1.00 | 0.00 | N |
| ATOM | 1096 | CZ   | ARG | 74 | 22.432 | 14.507 | -3.595 | 1.00 | 0.00 | C |
| ATOM | 1097 | NH1  | ARG | 74 | 23.238 | 15.073 | -2.708 | 1.00 | 0.00 | N |
| ATOM | 1098 | NH2  | ARG | 74 | 22.278 | 15.059 | -4.794 | 1.00 | 0.00 | N |
| ATOM | 1099 | H    | ARG | 74 | 20.635 | 11.404 | 1.097  | 1.00 | 0.00 | H |
| ATOM | 1100 | HA   | ARG | 74 | 18.684 | 13.472 | 0.716  | 1.00 | 0.00 | H |
| ATOM | 1101 | 2HB3 | ARG | 74 | 18.935 | 12.997 | -1.660 | 1.00 | 0.00 | H |
| ATOM | 1102 | 2HG3 | ARG | 74 | 21.371 | 13.227 | 0.007  | 1.00 | 0.00 | H |
| ATOM | 1103 | 2HD3 | ARG | 74 | 21.679 | 11.668 | -2.130 | 1.00 | 0.00 | H |
| ATOM | 1104 | HE   | ARG | 74 | 21.188 | 12.991 | -3.960 | 1.00 | 0.00 | H |
| ATOM | 1105 | 1HH1 | ARG | 74 | 23.357 | 14.657 | -1.807 | 1.00 | 0.00 | H |
| ATOM | 1106 | 2HH1 | ARG | 74 | 23.729 | 15.913 | -2.943 | 1.00 | 0.00 | H |
| ATOM | 1107 | 1HH2 | ARG | 74 | 21.672 | 14.637 | -5.463 | 1.00 | 0.00 | H |
| ATOM | 1108 | 2HH2 | ARG | 74 | 22.769 | 15.900 | -5.021 | 1.00 | 0.00 | H |
| ATOM | 1109 | HB2  | ARG | 74 | 19.843 | 11.509 | -1.295 | 1.00 | 0.00 | H |
| ATOM | 1110 | HG2  | ARG | 74 | 20.734 | 14.329 | -1.234 | 1.00 | 0.00 | H |
| ATOM | 1111 | HD2  | ARG | 74 | 22.913 | 12.855 | -1.647 | 1.00 | 0.00 | H |
| ATOM | 1112 | N    | LYS | 75 | 17.807 | 10.327 | 0.515  | 1.00 | 0.00 | N |
| ATOM | 1113 | CA   | LYS | 75 | 16.667 | 9.419  | 0.469  | 1.00 | 0.00 | C |
| ATOM | 1114 | C    | LYS | 75 | 15.733 | 9.657  | 1.651  | 1.00 | 0.00 | C |
| ATOM | 1115 | O    | LYS | 75 | 14.593 | 9.194  | 1.656  | 1.00 | 0.00 | O |
| ATOM | 1116 | CB   | LYS | 75 | 17.147 | 7.965  | 0.468  | 1.00 | 0.00 | C |
| ATOM | 1117 | CG   | LYS | 75 | 16.022 | 6.954  | 0.317  | 1.00 | 0.00 | C |
| ATOM | 1118 | CD   | LYS | 75 | 15.327 | 7.092  | -1.028 | 1.00 | 0.00 | C |
| ATOM | 1119 | CE   | LYS | 75 | 16.234 | 6.664  | -2.171 | 1.00 | 0.00 | C |
| ATOM | 1120 | NZ   | LYS | 75 | 17.032 | 7.806  | -2.701 | 1.00 | 0.00 | N |
| ATOM | 1121 | H    | LYS | 75 | 18.701 | 9.963  | 0.682  | 1.00 | 0.00 | H |
| ATOM | 1122 | HA   | LYS | 75 | 16.127 | 9.611  | -0.448 | 1.00 | 0.00 | H |
| ATOM | 1123 | 2HB3 | LYS | 75 | 17.657 | 7.768  | 1.400  | 1.00 | 0.00 | H |
| ATOM | 1124 | 2HG3 | LYS | 75 | 15.299 | 7.115  | 1.104  | 1.00 | 0.00 | H |
| ATOM | 1125 | 2HD3 | LYS | 75 | 15.042 | 8.124  | -1.171 | 1.00 | 0.00 | H |
| ATOM | 1126 | 2HE3 | LYS | 75 | 15.624 | 6.261  | -2.966 | 1.00 | 0.00 | H |
| ATOM | 1127 | 1HZ  | LYS | 75 | 16.581 | 8.187  | -3.557 | 1.00 | 0.00 | H |
| ATOM | 1128 | 2HZ  | LYS | 75 | 17.992 | 7.487  | -2.942 | 1.00 | 0.00 | H |
| ATOM | 1129 | 3HZ  | LYS | 75 | 17.096 | 8.559  | -1.988 | 1.00 | 0.00 | H |
| ATOM | 1130 | HB2  | LYS | 75 | 17.820 | 7.804  | -0.374 | 1.00 | 0.00 | H |
| ATOM | 1131 | HG2  | LYS | 75 | 16.428 | 5.946  | 0.382  | 1.00 | 0.00 | H |
| ATOM | 1132 | HD2  | LYS | 75 | 14.445 | 6.453  | -1.047 | 1.00 | 0.00 | H |
| ATOM | 1133 | HE2  | LYS | 75 | 16.936 | 5.908  | -1.816 | 1.00 | 0.00 | H |
| ATOM | 1134 | N    | MET | 76 | 16.224 | 10.385 | 2.648  | 1.00 | 0.00 | N |
| ATOM | 1135 | CA   | MET | 76 | 15.432 | 10.687 | 3.835  | 1.00 | 0.00 | C |
| ATOM | 1136 | C    | MET | 76 | 14.319 | 11.677 | 3.509  | 1.00 | 0.00 | C |
| ATOM | 1137 | O    | MET | 76 | 13.247 | 11.645 | 4.112  | 1.00 | 0.00 | O |
| ATOM | 1138 | CB   | MET | 76 | 16.325 | 11.254 | 4.941  | 1.00 | 0.00 | C |
| ATOM | 1139 | CG   | MET | 76 | 16.778 | 10.210 | 5.950  | 1.00 | 0.00 | C |
| ATOM | 1140 | SD   | MET | 76 | 15.415 | 9.548  | 6.925  | 1.00 | 0.00 | S |
| ATOM | 1141 | CE   | MET | 76 | 15.240 | 7.918  | 6.201  | 1.00 | 0.00 | C |
| ATOM | 1142 | H    | MET | 76 | 17.140 | 10.727 | 2.586  | 1.00 | 0.00 | H |
| ATOM | 1143 | HA   | MET | 76 | 14.988 | 9.766  | 4.179  | 1.00 | 0.00 | H |
| ATOM | 1144 | 2HB3 | MET | 76 | 15.779 | 12.020 | 5.471  | 1.00 | 0.00 | H |
| ATOM | 1145 | 2HG3 | MET | 76 | 17.495 | 10.663 | 6.617  | 1.00 | 0.00 | H |

|      |      |      |     |    |        |        |        |      |      |   |
|------|------|------|-----|----|--------|--------|--------|------|------|---|
| ATOM | 1146 | 1HE  | MET | 76 | 15.156 | 8.010  | 5.128  | 1.00 | 0.00 | H |
| ATOM | 1147 | 2HE  | MET | 76 | 16.104 | 7.321  | 6.446  | 1.00 | 0.00 | H |
| ATOM | 1148 | 3HE  | MET | 76 | 14.351 | 7.446  | 6.593  | 1.00 | 0.00 | H |
| ATOM | 1149 | HB2  | MET | 76 | 17.230 | 11.669 | 4.500  | 1.00 | 0.00 | H |
| ATOM | 1150 | HG2  | MET | 76 | 17.228 | 9.367  | 5.425  | 1.00 | 0.00 | H |
| ATOM | 1151 | N    | LYS | 77 | 14.578 | 12.557 | 2.546  | 1.00 | 0.00 | N |
| ATOM | 1152 | CA   | LYS | 77 | 13.600 | 13.557 | 2.139  | 1.00 | 0.00 | C |
| ATOM | 1153 | C    | LYS | 77 | 12.686 | 13.008 | 1.046  | 1.00 | 0.00 | C |
| ATOM | 1154 | O    | LYS | 77 | 11.512 | 13.372 | 0.964  | 1.00 | 0.00 | O |
| ATOM | 1155 | CB   | LYS | 77 | 14.307 | 14.819 | 1.640  | 1.00 | 0.00 | C |
| ATOM | 1156 | CG   | LYS | 77 | 14.757 | 14.734 | 0.190  | 1.00 | 0.00 | C |
| ATOM | 1157 | CD   | LYS | 77 | 13.676 | 15.230 | -0.756 | 1.00 | 0.00 | C |
| ATOM | 1158 | CE   | LYS | 77 | 13.603 | 16.749 | -0.770 | 1.00 | 0.00 | C |
| ATOM | 1159 | NZ   | LYS | 77 | 14.771 | 17.357 | -1.462 | 1.00 | 0.00 | N |
| ATOM | 1160 | H    | LYS | 77 | 15.452 | 12.534 | 2.101  | 1.00 | 0.00 | H |
| ATOM | 1161 | HA   | LYS | 77 | 12.999 | 13.807 | 3.001  | 1.00 | 0.00 | H |
| ATOM | 1162 | 2HB3 | LYS | 77 | 15.177 | 14.994 | 2.255  | 1.00 | 0.00 | H |
| ATOM | 1163 | 2HG3 | LYS | 77 | 14.985 | 13.704 | -0.045 | 1.00 | 0.00 | H |
| ATOM | 1164 | 2HD3 | LYS | 77 | 12.721 | 14.832 | -0.441 | 1.00 | 0.00 | H |
| ATOM | 1165 | 2HE3 | LYS | 77 | 13.575 | 17.104 | 0.249  | 1.00 | 0.00 | H |
| ATOM | 1166 | 1HZ  | LYS | 77 | 15.378 | 17.849 | -0.775 | 1.00 | 0.00 | H |
| ATOM | 1167 | 2HZ  | LYS | 77 | 14.450 | 18.039 | -2.176 | 1.00 | 0.00 | H |
| ATOM | 1168 | 3HZ  | LYS | 77 | 15.331 | 16.617 | -1.936 | 1.00 | 0.00 | H |
| ATOM | 1169 | HB2  | LYS | 77 | 13.623 | 15.666 | 1.699  | 1.00 | 0.00 | H |
| ATOM | 1170 | HG2  | LYS | 77 | 15.640 | 15.353 | 0.046  | 1.00 | 0.00 | H |
| ATOM | 1171 | HD2  | LYS | 77 | 13.901 | 14.898 | -1.770 | 1.00 | 0.00 | H |
| ATOM | 1172 | HE2  | LYS | 77 | 12.704 | 17.066 | -1.302 | 1.00 | 0.00 | H |
| ATOM | 1173 | N    | ASP | 78 | 13.232 | 12.131 | 0.210  | 1.00 | 0.00 | N |
| ATOM | 1174 | CA   | ASP | 78 | 12.464 | 11.531 | -0.875 | 1.00 | 0.00 | C |
| ATOM | 1175 | C    | ASP | 78 | 11.198 | 10.869 | -0.344 | 1.00 | 0.00 | C |
| ATOM | 1176 | O    | ASP | 78 | 10.170 | 10.838 | -1.021 | 1.00 | 0.00 | O |
| ATOM | 1177 | CB   | ASP | 78 | 13.317 | 10.503 | -1.622 | 1.00 | 0.00 | C |
| ATOM | 1178 | CG   | ASP | 78 | 14.184 | 11.138 | -2.694 | 1.00 | 0.00 | C |
| ATOM | 1179 | OD1  | ASP | 78 | 14.617 | 12.293 | -2.498 | 1.00 | 0.00 | O |
| ATOM | 1180 | OD2  | ASP | 78 | 14.426 | 10.480 | -3.728 | 1.00 | 0.00 | O |
| ATOM | 1181 | H    | ASP | 78 | 14.172 | 11.881 | 0.328  | 1.00 | 0.00 | H |
| ATOM | 1182 | HA   | ASP | 78 | 12.186 | 12.318 | -1.557 | 1.00 | 0.00 | H |
| ATOM | 1183 | 2HB3 | ASP | 78 | 12.668 | 9.780  | -2.091 | 1.00 | 0.00 | H |
| ATOM | 1184 | HB2  | ASP | 78 | 13.984 | 10.003 | -0.919 | 1.00 | 0.00 | H |
| ATOM | 1185 | N    | THR | 79 | 11.279 | 10.338 | 0.873  | 1.00 | 0.00 | N |
| ATOM | 1186 | CA   | THR | 79 | 10.141 | 9.675  | 1.494  | 1.00 | 0.00 | C |
| ATOM | 1187 | C    | THR | 79 | 9.213  | 10.683 | 2.163  | 1.00 | 0.00 | C |
| ATOM | 1188 | O    | THR | 79 | 8.049  | 10.386 | 2.435  | 1.00 | 0.00 | O |
| ATOM | 1189 | CB   | THR | 79 | 10.596 | 8.640  | 2.542  | 1.00 | 0.00 | C |
| ATOM | 1190 | OG1  | THR | 79 | 11.425 | 7.650  | 1.923  | 1.00 | 0.00 | O |
| ATOM | 1191 | CG2  | THR | 79 | 9.397  | 7.969  | 3.197  | 1.00 | 0.00 | C |
| ATOM | 1192 | H    | THR | 79 | 12.126 | 10.394 | 1.362  | 1.00 | 0.00 | H |
| ATOM | 1193 | HA   | THR | 79 | 9.592  | 9.155  | 0.720  | 1.00 | 0.00 | H |
| ATOM | 1194 | HB   | THR | 79 | 11.165 | 9.150  | 3.305  | 1.00 | 0.00 | H |
| ATOM | 1195 | 1HG  | THR | 79 | 11.755 | 7.985  | 1.087  | 1.00 | 0.00 | H |
| ATOM | 1196 | 1HG2 | THR | 79 | 9.740  | 7.201  | 3.872  | 1.00 | 0.00 | H |
| ATOM | 1197 | 2HG2 | THR | 79 | 8.772  | 7.526  | 2.435  | 1.00 | 0.00 | H |
| ATOM | 1198 | 3HG2 | THR | 79 | 8.830  | 8.705  | 3.746  | 1.00 | 0.00 | H |
| ATOM | 1199 | N    | ASP | 80 | 9.736  | 11.877 | 2.424  | 1.00 | 0.00 | N |
| ATOM | 1200 | CA   | ASP | 80 | 8.953  | 12.929 | 3.060  | 1.00 | 0.00 | C |
| ATOM | 1201 | C    | ASP | 80 | 7.537  | 12.973 | 2.495  | 1.00 | 0.00 | C |
| ATOM | 1202 | O    | ASP | 80 | 6.584  | 13.296 | 3.202  | 1.00 | 0.00 | O |
| ATOM | 1203 | CB   | ASP | 80 | 9.634  | 14.286 | 2.867  | 1.00 | 0.00 | C |
| ATOM | 1204 | CG   | ASP | 80 | 9.239  | 15.289 | 3.934  | 1.00 | 0.00 | C |
| ATOM | 1205 | OD1  | ASP | 80 | 8.186  | 15.941 | 3.775  | 1.00 | 0.00 | O |
| ATOM | 1206 | OD2  | ASP | 80 | 9.983  | 15.420 | 4.926  | 1.00 | 0.00 | O |
| ATOM | 1207 | H    | ASP | 80 | 10.669 | 12.052 | 2.184  | 1.00 | 0.00 | H |
| ATOM | 1208 | HA   | ASP | 80 | 8.899  | 12.713 | 4.116  | 1.00 | 0.00 | H |
| ATOM | 1209 | 2HB3 | ASP | 80 | 9.357  | 14.684 | 1.903  | 1.00 | 0.00 | H |
| ATOM | 1210 | HB2  | ASP | 80 | 10.717 | 14.161 | 2.921  | 1.00 | 0.00 | H |
| ATOM | 1211 | N    | SER | 81 | 7.407  | 12.645 | 1.213  | 1.00 | 0.00 | N |
| ATOM | 1212 | CA   | SER | 81 | 6.109  | 12.649 | 0.551  | 1.00 | 0.00 | C |
| ATOM | 1213 | C    | SER | 81 | 5.020  | 12.137 | 1.486  | 1.00 | 0.00 | C |
| ATOM | 1214 | O    | SER | 81 | 3.859  | 12.536 | 1.384  | 1.00 | 0.00 | O |
| ATOM | 1215 | CB   | SER | 81 | 6.154  | 11.791 | -0.716 | 1.00 | 0.00 | C |
| ATOM | 1216 | OG   | SER | 81 | 7.103  | 12.298 | -1.640 | 1.00 | 0.00 | O |
| ATOM | 1217 | H    | SER | 81 | 8.206  | 12.395 | 0.699  | 1.00 | 0.00 | H |
| ATOM | 1218 | HA   | SER | 81 | 5.879  | 13.668 | 0.276  | 1.00 | 0.00 | H |
| ATOM | 1219 | 2HB3 | SER | 81 | 5.181  | 11.791 | -1.183 | 1.00 | 0.00 | H |
| ATOM | 1220 | HG   | SER | 81 | 7.910  | 11.779 | -1.588 | 1.00 | 0.00 | H |
| ATOM | 1221 | HB2  | SER | 81 | 6.435  | 10.772 | -0.454 | 1.00 | 0.00 | H |
| ATOM | 1222 | N    | GLU | 82 | 5.401  | 11.247 | 2.397  | 1.00 | 0.00 | N |

|      |      |      |     |    |        |        |        |      |      |   |
|------|------|------|-----|----|--------|--------|--------|------|------|---|
| ATOM | 1223 | CA   | GLU | 82 | 4.457  | 10.677 | 3.352  | 1.00 | 0.00 | C |
| ATOM | 1224 | C    | GLU | 82 | 3.383  | 11.693 | 3.728  | 1.00 | 0.00 | C |
| ATOM | 1225 | O    | GLU | 82 | 2.190  | 11.415 | 3.621  | 1.00 | 0.00 | O |
| ATOM | 1226 | CB   | GLU | 82 | 5.191  | 10.205 | 4.609  | 1.00 | 0.00 | C |
| ATOM | 1227 | CG   | GLU | 82 | 4.268  | 9.626  | 5.669  | 1.00 | 0.00 | C |
| ATOM | 1228 | CD   | GLU | 82 | 4.974  | 9.400  | 6.994  | 1.00 | 0.00 | C |
| ATOM | 1229 | OE1  | GLU | 82 | 5.945  | 10.130 | 7.283  | 1.00 | 0.00 | O |
| ATOM | 1230 | OE2  | GLU | 82 | 4.553  | 8.490  | 7.740  | 1.00 | 0.00 | O |
| ATOM | 1231 | H    | GLU | 82 | 6.342  | 10.968 | 2.428  | 1.00 | 0.00 | H |
| ATOM | 1232 | HA   | GLU | 82 | 3.984  | 9.827  | 2.882  | 1.00 | 0.00 | H |
| ATOM | 1233 | 2HB3 | GLU | 82 | 5.717  | 11.044 | 5.039  | 1.00 | 0.00 | H |
| ATOM | 1234 | 2HG3 | GLU | 82 | 3.886  | 8.680  | 5.316  | 1.00 | 0.00 | H |
| ATOM | 1235 | HB2  | GLU | 82 | 5.887  | 9.410  | 4.348  | 1.00 | 0.00 | H |
| ATOM | 1236 | HG2  | GLU | 82 | 3.447  | 10.319 | 5.855  | 1.00 | 0.00 | H |
| ATOM | 1237 | N    | GLU | 83 | 3.818  | 12.870 | 4.165  | 1.00 | 0.00 | N |
| ATOM | 1238 | CA   | GLU | 83 | 2.894  | 13.926 | 4.558  | 1.00 | 0.00 | C |
| ATOM | 1239 | C    | GLU | 83 | 1.951  | 14.281 | 3.411  | 1.00 | 0.00 | C |
| ATOM | 1240 | O    | GLU | 83 | 0.732  | 14.287 | 3.573  | 1.00 | 0.00 | O |
| ATOM | 1241 | CB   | GLU | 83 | 3.665  | 15.172 | 5.001  | 1.00 | 0.00 | C |
| ATOM | 1242 | CG   | GLU | 83 | 4.589  | 14.926 | 6.181  | 1.00 | 0.00 | C |
| ATOM | 1243 | CD   | GLU | 83 | 4.789  | 16.167 | 7.033  | 1.00 | 0.00 | C |
| ATOM | 1244 | OE1  | GLU | 83 | 4.901  | 17.269 | 6.459  | 1.00 | 0.00 | O |
| ATOM | 1245 | OE2  | GLU | 83 | 4.832  | 16.032 | 8.275  | 1.00 | 0.00 | O |
| ATOM | 1246 | H    | GLU | 83 | 4.783  | 13.031 | 4.228  | 1.00 | 0.00 | H |
| ATOM | 1247 | HA   | GLU | 83 | 2.307  | 13.565 | 5.390  | 1.00 | 0.00 | H |
| ATOM | 1248 | 2HB3 | GLU | 83 | 2.957  | 15.939 | 5.278  | 1.00 | 0.00 | H |
| ATOM | 1249 | 2HG3 | GLU | 83 | 5.550  | 14.604 | 5.810  | 1.00 | 0.00 | H |
| ATOM | 1250 | HB2  | GLU | 83 | 4.300  | 15.517 | 4.186  | 1.00 | 0.00 | H |
| ATOM | 1251 | HG2  | GLU | 83 | 4.160  | 14.160 | 6.827  | 1.00 | 0.00 | H |
| ATOM | 1252 | N    | GLU | 84 | 2.528  | 14.575 | 2.251  | 1.00 | 0.00 | N |
| ATOM | 1253 | CA   | GLU | 84 | 1.741  | 14.931 | 1.074  | 1.00 | 0.00 | C |
| ATOM | 1254 | C    | GLU | 84 | 0.483  | 14.071 | 0.982  | 1.00 | 0.00 | C |
| ATOM | 1255 | O    | GLU | 84 | -0.531 | 14.495 | 0.426  | 1.00 | 0.00 | O |
| ATOM | 1256 | CB   | GLU | 84 | 2.579  | 14.770 | -0.197 | 1.00 | 0.00 | C |
| ATOM | 1257 | CG   | GLU | 84 | 3.699  | 15.786 | -0.318 | 1.00 | 0.00 | C |
| ATOM | 1258 | CD   | GLU | 84 | 3.195  | 17.174 | -0.666 | 1.00 | 0.00 | C |
| ATOM | 1259 | OE1  | GLU | 84 | 3.034  | 17.462 | -1.870 | 1.00 | 0.00 | O |
| ATOM | 1260 | OE2  | GLU | 84 | 2.963  | 17.972 | 0.265  | 1.00 | 0.00 | O |
| ATOM | 1261 | H    | GLU | 84 | 3.505  | 14.554 | 2.183  | 1.00 | 0.00 | H |
| ATOM | 1262 | HA   | GLU | 84 | 1.447  | 15.965 | 1.173  | 1.00 | 0.00 | H |
| ATOM | 1263 | 2HB3 | GLU | 84 | 1.931  | 14.874 | -1.054 | 1.00 | 0.00 | H |
| ATOM | 1264 | 2HG3 | GLU | 84 | 4.380  | 15.464 | -1.093 | 1.00 | 0.00 | H |
| ATOM | 1265 | HB2  | GLU | 84 | 3.057  | 13.791 | -0.195 | 1.00 | 0.00 | H |
| ATOM | 1266 | HG2  | GLU | 84 | 4.226  | 15.863 | 0.633  | 1.00 | 0.00 | H |
| ATOM | 1267 | N    | ILE | 85 | 0.558  | 12.862 | 1.527  | 1.00 | 0.00 | N |
| ATOM | 1268 | CA   | ILE | 85 | -0.572 | 11.942 | 1.506  | 1.00 | 0.00 | C |
| ATOM | 1269 | C    | ILE | 85 | -1.482 | 12.165 | 2.707  | 1.00 | 0.00 | C |
| ATOM | 1270 | O    | ILE | 85 | -2.705 | 12.060 | 2.602  | 1.00 | 0.00 | O |
| ATOM | 1271 | CB   | ILE | 85 | -0.103 | 10.475 | 1.493  | 1.00 | 0.00 | C |
| ATOM | 1272 | CG2  | ILE | 85 | -1.298 | 9.539  | 1.384  | 1.00 | 0.00 | C |
| ATOM | 1273 | CG1  | ILE | 85 | 0.874  | 10.238 | 0.342  | 1.00 | 0.00 | C |
| ATOM | 1274 | CD1  | ILE | 85 | 1.487  | 8.856  | 0.343  | 1.00 | 0.00 | C |
| ATOM | 1275 | H    | ILE | 85 | 1.395  | 12.582 | 1.955  | 1.00 | 0.00 | H |
| ATOM | 1276 | HA   | ILE | 85 | -1.134 | 12.128 | 0.603  | 1.00 | 0.00 | H |
| ATOM | 1277 | HB   | ILE | 85 | 0.397  | 10.272 | 2.430  | 1.00 | 0.00 | H |
| ATOM | 1278 | 1HG2 | ILE | 85 | -1.965 | 9.898  | 0.612  | 1.00 | 0.00 | H |
| ATOM | 1279 | 2HG2 | ILE | 85 | -0.956 | 8.547  | 1.130  | 1.00 | 0.00 | H |
| ATOM | 1280 | 3HG2 | ILE | 85 | -1.822 | 9.509  | 2.327  | 1.00 | 0.00 | H |
| ATOM | 1281 | 2HG3 | ILE | 85 | 1.677  | 10.957 | 0.407  | 1.00 | 0.00 | H |
| ATOM | 1282 | 1HD1 | ILE | 85 | 1.059  | 8.272  | 1.146  | 1.00 | 0.00 | H |
| ATOM | 1283 | 2HD1 | ILE | 85 | 1.286  | 8.370  | -0.599 | 1.00 | 0.00 | H |
| ATOM | 1284 | 3HD1 | ILE | 85 | 2.555  | 8.934  | 0.488  | 1.00 | 0.00 | H |
| ATOM | 1285 | HG2  | ILE | 85 | 0.351  | 10.352 | -0.608 | 1.00 | 0.00 | H |
| ATOM | 1286 | N    | ARG | 86 | -0.880 | 12.473 | 3.852  | 1.00 | 0.00 | N |
| ATOM | 1287 | CA   | ARG | 86 | -1.636 | 12.709 | 5.075  | 1.00 | 0.00 | C |
| ATOM | 1288 | C    | ARG | 86 | -2.902 | 13.511 | 4.783  | 1.00 | 0.00 | C |
| ATOM | 1289 | O    | ARG | 86 | -4.010 | 13.065 | 5.073  | 1.00 | 0.00 | O |
| ATOM | 1290 | CB   | ARG | 86 | -0.774 | 13.451 | 6.099  | 1.00 | 0.00 | C |
| ATOM | 1291 | CG   | ARG | 86 | 0.266  | 12.571 | 6.771  | 1.00 | 0.00 | C |
| ATOM | 1292 | CD   | ARG | 86 | -0.273 | 11.952 | 8.053  | 1.00 | 0.00 | C |
| ATOM | 1293 | NE   | ARG | 86 | -0.596 | 12.965 | 9.053  | 1.00 | 0.00 | N |
| ATOM | 1294 | CZ   | ARG | 86 | -0.625 | 12.726 | 10.360 | 1.00 | 0.00 | C |
| ATOM | 1295 | NH1  | ARG | 86 | -0.350 | 11.513 | 10.821 | 1.00 | 0.00 | N |
| ATOM | 1296 | NH2  | ARG | 86 | -0.928 | 13.699 | 11.209 | 1.00 | 0.00 | N |
| ATOM | 1297 | H    | ARG | 86 | 0.098  | 12.542 | 3.873  | 1.00 | 0.00 | H |
| ATOM | 1298 | HA   | ARG | 86 | -1.919 | 11.750 | 5.482  | 1.00 | 0.00 | H |
| ATOM | 1299 | 2HB3 | ARG | 86 | -1.416 | 13.863 | 6.863  | 1.00 | 0.00 | H |

|      |      |      |     |    |         |        |        |      |      |   |
|------|------|------|-----|----|---------|--------|--------|------|------|---|
| ATOM | 1300 | 2HG3 | ARG | 86 | 1.133   | 13.168 | 7.006  | 1.00 | 0.00 | H |
| ATOM | 1301 | 2HD3 | ARG | 86 | 0.473   | 11.285 | 8.456  | 1.00 | 0.00 | H |
| ATOM | 1302 | HE   | ARG | 86 | -0.805  | 13.868 | 8.736  | 1.00 | 0.00 | H |
| ATOM | 1303 | 1HH1 | ARG | 86 | -0.121  | 10.777 | 10.183 | 1.00 | 0.00 | H |
| ATOM | 1304 | 2HH1 | ARG | 86 | -0.372  | 11.335 | 11.806 | 1.00 | 0.00 | H |
| ATOM | 1305 | 1HH2 | ARG | 86 | -1.135  | 14.613 | 10.865 | 1.00 | 0.00 | H |
| ATOM | 1306 | 2HH2 | ARG | 86 | -0.949  | 13.517 | 12.191 | 1.00 | 0.00 | H |
| ATOM | 1307 | HB2  | ARG | 86 | -0.221  | 14.247 | 5.599  | 1.00 | 0.00 | H |
| ATOM | 1308 | HG2  | ARG | 86 | 0.543   | 11.758 | 6.099  | 1.00 | 0.00 | H |
| ATOM | 1309 | HD2  | ARG | 86 | -1.190  | 11.404 | 7.835  | 1.00 | 0.00 | H |
| ATOM | 1310 | N    | GLU | 87 | -2.726  | 14.698 | 4.211  | 1.00 | 0.00 | N |
| ATOM | 1311 | CA   | GLU | 87 | -3.853  | 15.563 | 3.882  | 1.00 | 0.00 | C |
| ATOM | 1312 | C    | GLU | 87 | -5.058  | 14.739 | 3.436  | 1.00 | 0.00 | C |
| ATOM | 1313 | O    | GLU | 87 | -6.162  | 14.902 | 3.955  | 1.00 | 0.00 | O |
| ATOM | 1314 | CB   | GLU | 87 | -3.464  | 16.554 | 2.785  | 1.00 | 0.00 | C |
| ATOM | 1315 | CG   | GLU | 87 | -2.404  | 17.555 | 3.216  | 1.00 | 0.00 | C |
| ATOM | 1316 | CD   | GLU | 87 | -2.980  | 18.701 | 4.024  | 1.00 | 0.00 | C |
| ATOM | 1317 | OE1  | GLU | 87 | -3.739  | 19.509 | 3.449  | 1.00 | 0.00 | O |
| ATOM | 1318 | OE2  | GLU | 87 | -2.671  | 18.791 | 5.231  | 1.00 | 0.00 | O |
| ATOM | 1319 | H    | GLU | 87 | -1.817  | 15.000 | 4.005  | 1.00 | 0.00 | H |
| ATOM | 1320 | HA   | GLU | 87 | -4.121  | 16.113 | 4.773  | 1.00 | 0.00 | H |
| ATOM | 1321 | 2HB3 | GLU | 87 | -4.343  | 17.102 | 2.483  | 1.00 | 0.00 | H |
| ATOM | 1322 | 2HG3 | GLU | 87 | -1.928  | 17.958 | 2.335  | 1.00 | 0.00 | H |
| ATOM | 1323 | HB2  | GLU | 87 | -3.043  | 16.012 | 1.938  | 1.00 | 0.00 | H |
| ATOM | 1324 | HG2  | GLU | 87 | -1.667  | 17.054 | 3.846  | 1.00 | 0.00 | H |
| ATOM | 1325 | N    | ALA | 88 | -4.835  | 13.855 | 2.469  | 1.00 | 0.00 | N |
| ATOM | 1326 | CA   | ALA | 88 | -5.901  | 13.004 | 1.953  | 1.00 | 0.00 | C |
| ATOM | 1327 | C    | ALA | 88 | -6.567  | 12.214 | 3.074  | 1.00 | 0.00 | C |
| ATOM | 1328 | O    | ALA | 88 | -7.792  | 12.192 | 3.191  | 1.00 | 0.00 | O |
| ATOM | 1329 | CB   | ALA | 88 | -5.354  | 12.059 | 0.892  | 1.00 | 0.00 | C |
| ATOM | 1330 | H    | ALA | 88 | -3.934  | 13.769 | 2.098  | 1.00 | 0.00 | H |
| ATOM | 1331 | HA   | ALA | 88 | -6.639  | 13.640 | 1.487  | 1.00 | 0.00 | H |
| ATOM | 1332 | 1HB  | ALA | 88 | -4.409  | 11.655 | 1.224  | 1.00 | 0.00 | H |
| ATOM | 1333 | 2HB  | ALA | 88 | -6.056  | 11.255 | 0.733  | 1.00 | 0.00 | H |
| ATOM | 1334 | 3HB  | ALA | 88 | -5.210  | 12.601 | -0.030 | 1.00 | 0.00 | H |
| ATOM | 1335 | N    | PHE | 89 | -5.752  | 11.566 | 3.902  | 1.00 | 0.00 | N |
| ATOM | 1336 | CA   | PHE | 89 | -6.261  | 10.775 | 5.013  | 1.00 | 0.00 | C |
| ATOM | 1337 | C    | PHE | 89 | -7.240  | 11.586 | 5.855  | 1.00 | 0.00 | C |
| ATOM | 1338 | O    | PHE | 89 | -8.293  | 11.087 | 6.255  | 1.00 | 0.00 | O |
| ATOM | 1339 | CB   | PHE | 89 | -5.106  | 10.281 | 5.888  | 1.00 | 0.00 | C |
| ATOM | 1340 | CG   | PHE | 89 | -5.511  | 9.981  | 7.303  | 1.00 | 0.00 | C |
| ATOM | 1341 | CD1  | PHE | 89 | -6.134  | 8.788  | 7.621  | 1.00 | 0.00 | C |
| ATOM | 1342 | CE1  | PHE | 89 | -6.510  | 8.511  | 8.923  | 1.00 | 0.00 | C |
| ATOM | 1343 | CZ   | PHE | 89 | -6.258  | 9.431  | 9.923  | 1.00 | 0.00 | C |
| ATOM | 1344 | CE2  | PHE | 89 | -5.636  | 10.626 | 9.618  | 1.00 | 0.00 | C |
| ATOM | 1345 | CD2  | PHE | 89 | -5.266  | 10.896 | 8.315  | 1.00 | 0.00 | C |
| ATOM | 1346 | H    | PHE | 89 | -4.782  | 11.623 | 3.756  | 1.00 | 0.00 | H |
| ATOM | 1347 | HA   | PHE | 89 | -6.778  | 9.920  | 4.602  | 1.00 | 0.00 | H |
| ATOM | 1348 | 2HB3 | PHE | 89 | -4.336  | 11.036 | 5.912  | 1.00 | 0.00 | H |
| ATOM | 1349 | 1HD  | PHE | 89 | -6.329  | 8.067  | 6.842  | 1.00 | 0.00 | H |
| ATOM | 1350 | 1HE  | PHE | 89 | -6.994  | 7.576  | 9.160  | 1.00 | 0.00 | H |
| ATOM | 1351 | HZ   | PHE | 89 | -6.550  | 9.218  | 10.940 | 1.00 | 0.00 | H |
| ATOM | 1352 | 2HE  | PHE | 89 | -5.441  | 11.347 | 10.396 | 1.00 | 0.00 | H |
| ATOM | 1353 | 2HD  | PHE | 89 | -4.780  | 11.833 | 8.076  | 1.00 | 0.00 | H |
| ATOM | 1354 | HB2  | PHE | 89 | -4.708  | 9.353  | 5.477  | 1.00 | 0.00 | H |
| ATOM | 1355 | N    | ARG | 90 | -6.885  | 12.839 | 6.120  | 1.00 | 0.00 | N |
| ATOM | 1356 | CA   | ARG | 90 | -7.732  | 13.719 | 6.917  | 1.00 | 0.00 | C |
| ATOM | 1357 | C    | ARG | 90 | -9.118  | 13.853 | 6.292  | 1.00 | 0.00 | C |
| ATOM | 1358 | O    | ARG | 90 | -10.132 | 13.648 | 6.957  | 1.00 | 0.00 | O |
| ATOM | 1359 | CB   | ARG | 90 | -7.085  | 15.099 | 7.049  | 1.00 | 0.00 | C |
| ATOM | 1360 | CG   | ARG | 90 | -5.864  | 15.117 | 7.952  | 1.00 | 0.00 | C |
| ATOM | 1361 | CD   | ARG | 90 | -4.957  | 16.297 | 7.642  | 1.00 | 0.00 | C |
| ATOM | 1362 | NE   | ARG | 90 | -4.040  | 16.586 | 8.742  | 1.00 | 0.00 | N |
| ATOM | 1363 | CZ   | ARG | 90 | -4.363  | 17.332 | 9.793  | 1.00 | 0.00 | C |
| ATOM | 1364 | NH1  | ARG | 90 | -5.575  | 17.861 | 9.885  | 1.00 | 0.00 | N |
| ATOM | 1365 | NH2  | ARG | 90 | -3.474  | 17.549 | 10.751 | 1.00 | 0.00 | N |
| ATOM | 1366 | H    | ARG | 90 | -6.035  | 13.179 | 5.773  | 1.00 | 0.00 | H |
| ATOM | 1367 | HA   | ARG | 90 | -7.835  | 13.283 | 7.898  | 1.00 | 0.00 | H |
| ATOM | 1368 | 2HB3 | ARG | 90 | -7.815  | 15.787 | 7.452  | 1.00 | 0.00 | H |
| ATOM | 1369 | 2HG3 | ARG | 90 | -5.310  | 14.201 | 7.809  | 1.00 | 0.00 | H |
| ATOM | 1370 | 2HD3 | ARG | 90 | -5.570  | 17.167 | 7.460  | 1.00 | 0.00 | H |
| ATOM | 1371 | HE   | ARG | 90 | -3.139  | 16.206 | 8.692  | 1.00 | 0.00 | H |
| ATOM | 1372 | 1HH1 | ARG | 90 | -6.249  | 17.696 | 9.165  | 1.00 | 0.00 | H |
| ATOM | 1373 | 2HH1 | ARG | 90 | -5.818  | 18.421 | 10.679 | 1.00 | 0.00 | H |
| ATOM | 1374 | 1HH2 | ARG | 90 | -2.558  | 17.152 | 10.684 | 1.00 | 0.00 | H |
| ATOM | 1375 | 2HH2 | ARG | 90 | -3.719  | 18.111 | 11.541 | 1.00 | 0.00 | H |
| ATOM | 1376 | HB2  | ARG | 90 | -6.745  | 15.438 | 6.070  | 1.00 | 0.00 | H |

|      |      |      |     |    |         |        |        |      |      |   |
|------|------|------|-----|----|---------|--------|--------|------|------|---|
| ATOM | 1377 | HG2  | ARG | 90 | -6.181  | 15.203 | 8.992  | 1.00 | 0.00 | H |
| ATOM | 1378 | HD2  | ARG | 90 | -4.355  | 16.071 | 6.764  | 1.00 | 0.00 | H |
| ATOM | 1379 | N    | VAL | 91 | -9.153  | 14.199 | 5.010  | 1.00 | 0.00 | N |
| ATOM | 1380 | CA   | VAL | 91 | -10.413 | 14.360 | 4.294  | 1.00 | 0.00 | C |
| ATOM | 1381 | C    | VAL | 91 | -11.371 | 13.217 | 4.609  | 1.00 | 0.00 | C |
| ATOM | 1382 | O    | VAL | 91 | -12.509 | 13.442 | 5.024  | 1.00 | 0.00 | O |
| ATOM | 1383 | CB   | VAL | 91 | -10.190 | 14.427 | 2.772  | 1.00 | 0.00 | C |
| ATOM | 1384 | CG1  | VAL | 91 | -11.520 | 14.535 | 2.041  | 1.00 | 0.00 | C |
| ATOM | 1385 | CG2  | VAL | 91 | -9.279  | 15.591 | 2.416  | 1.00 | 0.00 | C |
| ATOM | 1386 | H    | VAL | 91 | -8.309  | 14.352 | 4.532  | 1.00 | 0.00 | H |
| ATOM | 1387 | HA   | VAL | 91 | -10.861 | 15.291 | 4.609  | 1.00 | 0.00 | H |
| ATOM | 1388 | HB   | VAL | 91 | -9.709  | 13.511 | 2.459  | 1.00 | 0.00 | H |
| ATOM | 1389 | 1HG1 | VAL | 91 | -12.086 | 15.360 | 2.448  | 1.00 | 0.00 | H |
| ATOM | 1390 | 2HG1 | VAL | 91 | -11.339 | 14.704 | 0.989  | 1.00 | 0.00 | H |
| ATOM | 1391 | 3HG1 | VAL | 91 | -12.076 | 13.619 | 2.170  | 1.00 | 0.00 | H |
| ATOM | 1392 | 1HG2 | VAL | 91 | -9.757  | 16.206 | 1.667  | 1.00 | 0.00 | H |
| ATOM | 1393 | 2HG2 | VAL | 91 | -9.089  | 16.182 | 3.300  | 1.00 | 0.00 | H |
| ATOM | 1394 | 3HG2 | VAL | 91 | -8.345  | 15.214 | 2.028  | 1.00 | 0.00 | H |
| ATOM | 1395 | N    | PHE | 92 | -10.906 | 11.989 | 4.405  | 1.00 | 0.00 | N |
| ATOM | 1396 | CA   | PHE | 92 | -11.722 | 10.809 | 4.666  | 1.00 | 0.00 | C |
| ATOM | 1397 | C    | PHE | 92 | -12.180 | 10.776 | 6.121  | 1.00 | 0.00 | C |
| ATOM | 1398 | O    | PHE | 92 | -13.360 | 10.570 | 6.408  | 1.00 | 0.00 | O |
| ATOM | 1399 | CB   | PHE | 92 | -10.938 | 9.538  | 4.335  | 1.00 | 0.00 | C |
| ATOM | 1400 | CG   | PHE | 92 | -10.870 | 9.240  | 2.865  | 1.00 | 0.00 | C |
| ATOM | 1401 | CD1  | PHE | 92 | -9.886  | 9.815  | 2.074  | 1.00 | 0.00 | C |
| ATOM | 1402 | CE1  | PHE | 92 | -9.820  | 9.543  | 0.722  | 1.00 | 0.00 | C |
| ATOM | 1403 | CZ   | PHE | 92 | -10.740 | 8.691  | 0.143  | 1.00 | 0.00 | C |
| ATOM | 1404 | CE2  | PHE | 92 | -11.725 | 8.113  | 0.919  | 1.00 | 0.00 | C |
| ATOM | 1405 | CD2  | PHE | 92 | -11.785 | 8.388  | 2.273  | 1.00 | 0.00 | C |
| ATOM | 1406 | H    | PHE | 92 | -9.992  | 11.874 | 4.072  | 1.00 | 0.00 | H |
| ATOM | 1407 | HA   | PHE | 92 | -12.592 | 10.861 | 4.028  | 1.00 | 0.00 | H |
| ATOM | 1408 | 2HB3 | PHE | 92 | -11.410 | 8.698  | 4.824  | 1.00 | 0.00 | H |
| ATOM | 1409 | 1HD  | PHE | 92 | -9.166  | 10.481 | 2.526  | 1.00 | 0.00 | H |
| ATOM | 1410 | 1HE  | PHE | 92 | -9.049  | 9.997  | 0.116  | 1.00 | 0.00 | H |
| ATOM | 1411 | HZ   | PHE | 92 | -10.691 | 8.477  | -0.915 | 1.00 | 0.00 | H |
| ATOM | 1412 | 2HE  | PHE | 92 | -12.447 | 7.444  | 0.469  | 1.00 | 0.00 | H |
| ATOM | 1413 | 2HD  | PHE | 92 | -12.557 | 7.934  | 2.880  | 1.00 | 0.00 | H |
| ATOM | 1414 | HB2  | PHE | 92 | -9.912  | 9.642  | 4.683  | 1.00 | 0.00 | H |
| ATOM | 1415 | N    | ASP | 93 | -11.238 | 10.977 | 7.036  | 1.00 | 0.00 | N |
| ATOM | 1416 | CA   | ASP | 93 | -11.543 | 10.969 | 8.462  | 1.00 | 0.00 | C |
| ATOM | 1417 | C    | ASP | 93 | -12.413 | 12.166 | 8.838  | 1.00 | 0.00 | C |
| ATOM | 1418 | O    | ASP | 93 | -11.909 | 13.269 | 9.052  | 1.00 | 0.00 | O |
| ATOM | 1419 | CB   | ASP | 93 | -10.251 | 10.985 | 9.281  | 1.00 | 0.00 | C |
| ATOM | 1420 | CG   | ASP | 93 | -10.455 | 10.467 | 10.691 | 1.00 | 0.00 | C |
| ATOM | 1421 | OD1  | ASP | 93 | -11.330 | 9.597  | 10.884 | 1.00 | 0.00 | O |
| ATOM | 1422 | OD2  | ASP | 93 | -9.740  | 10.931 | 11.603 | 1.00 | 0.00 | O |
| ATOM | 1423 | H    | ASP | 93 | -10.316 | 11.135 | 6.745  | 1.00 | 0.00 | H |
| ATOM | 1424 | HA   | ASP | 93 | -12.087 | 10.063 | 8.682  | 1.00 | 0.00 | H |
| ATOM | 1425 | 2HB3 | ASP | 93 | -9.881  | 11.997 | 9.339  | 1.00 | 0.00 | H |
| ATOM | 1426 | HB2  | ASP | 93 | -9.510  | 10.343 | 8.806  | 1.00 | 0.00 | H |
| ATOM | 1427 | N    | LYS | 94 | -13.720 | 11.941 | 8.915  | 1.00 | 0.00 | N |
| ATOM | 1428 | CA   | LYS | 94 | -14.660 | 13.000 | 9.262  | 1.00 | 0.00 | C |
| ATOM | 1429 | C    | LYS | 94 | -14.490 | 13.418 | 10.720 | 1.00 | 0.00 | C |
| ATOM | 1430 | O    | LYS | 94 | -14.131 | 14.560 | 11.009 | 1.00 | 0.00 | O |
| ATOM | 1431 | CB   | LYS | 94 | -16.097 | 12.533 | 9.020  | 1.00 | 0.00 | C |
| ATOM | 1432 | CG   | LYS | 94 | -16.581 | 12.770 | 7.600  | 1.00 | 0.00 | C |
| ATOM | 1433 | CD   | LYS | 94 | -18.084 | 12.984 | 7.551  | 1.00 | 0.00 | C |
| ATOM | 1434 | CE   | LYS | 94 | -18.827 | 11.668 | 7.358  | 1.00 | 0.00 | C |
| ATOM | 1435 | NZ   | LYS | 94 | -20.220 | 11.884 | 6.877  | 1.00 | 0.00 | N |
| ATOM | 1436 | H    | LYS | 94 | -14.060 | 11.040 | 8.730  | 1.00 | 0.00 | H |
| ATOM | 1437 | HA   | LYS | 94 | -14.454 | 13.849 | 8.631  | 1.00 | 0.00 | H |
| ATOM | 1438 | 2HB3 | LYS | 94 | -16.753 | 13.065 | 9.694  | 1.00 | 0.00 | H |
| ATOM | 1439 | 2HG3 | LYS | 94 | -16.328 | 11.909 | 6.996  | 1.00 | 0.00 | H |
| ATOM | 1440 | 2HD3 | LYS | 94 | -18.319 | 13.642 | 6.727  | 1.00 | 0.00 | H |
| ATOM | 1441 | 2HE3 | LYS | 94 | -18.857 | 11.146 | 8.304  | 1.00 | 0.00 | H |
| ATOM | 1442 | 1HZ  | LYS | 94 | -20.289 | 11.652 | 5.866  | 1.00 | 0.00 | H |
| ATOM | 1443 | 2HZ  | LYS | 94 | -20.494 | 12.879 | 7.013  | 1.00 | 0.00 | H |
| ATOM | 1444 | 3HZ  | LYS | 94 | -20.880 | 11.279 | 7.407  | 1.00 | 0.00 | H |
| ATOM | 1445 | HB2  | LYS | 94 | -16.166 | 11.459 | 9.192  | 1.00 | 0.00 | H |
| ATOM | 1446 | HG2  | LYS | 94 | -16.102 | 13.663 | 7.195  | 1.00 | 0.00 | H |
| ATOM | 1447 | HD2  | LYS | 94 | -18.418 | 13.426 | 8.489  | 1.00 | 0.00 | H |
| ATOM | 1448 | HE2  | LYS | 94 | -18.311 | 11.066 | 6.610  | 1.00 | 0.00 | H |
| ATOM | 1449 | N    | ASP | 95 | -14.748 | 12.488 | 11.632 | 1.00 | 0.00 | N |
| ATOM | 1450 | CA   | ASP | 95 | -14.621 | 12.760 | 13.059 | 1.00 | 0.00 | C |
| ATOM | 1451 | C    | ASP | 95 | -13.252 | 13.357 | 13.379 | 1.00 | 0.00 | C |
| ATOM | 1452 | O    | ASP | 95 | -13.144 | 14.312 | 14.146 | 1.00 | 0.00 | O |
| ATOM | 1453 | CB   | ASP | 95 | -14.836 | 11.478 | 13.865 | 1.00 | 0.00 | C |

|      |      |      |     |     |         |        |        |      |      |   |
|------|------|------|-----|-----|---------|--------|--------|------|------|---|
| ATOM | 1454 | CG   | ASP | 95  | -13.763 | 10.442 | 13.601 | 1.00 | 0.00 | C |
| ATOM | 1455 | OD1  | ASP | 95  | -13.230 | 10.416 | 12.471 | 1.00 | 0.00 | O |
| ATOM | 1456 | OD2  | ASP | 95  | -13.457 | 9.655  | 14.521 | 1.00 | 0.00 | O |
| ATOM | 1457 | H    | ASP | 95  | -15.030 | 11.597 | 11.339 | 1.00 | 0.00 | H |
| ATOM | 1458 | HA   | ASP | 95  | -15.383 | 13.476 | 13.329 | 1.00 | 0.00 | H |
| ATOM | 1459 | 2HB3 | ASP | 95  | -15.793 | 11.056 | 13.607 | 1.00 | 0.00 | H |
| ATOM | 1460 | HB2  | ASP | 95  | -14.803 | 11.709 | 14.931 | 1.00 | 0.00 | H |
| ATOM | 1461 | N    | GLY | 96  | -12.210 | 12.780 | 12.787 | 1.00 | 0.00 | N |
| ATOM | 1462 | CA   | GLY | 96  | -10.864 | 13.266 | 13.022 | 1.00 | 0.00 | C |
| ATOM | 1463 | C    | GLY | 96  | -10.235 | 12.657 | 14.260 | 1.00 | 0.00 | C |
| ATOM | 1464 | O    | GLY | 96  | -9.627  | 13.360 | 15.066 | 1.00 | 0.00 | O |
| ATOM | 1465 | H    | GLY | 96  | -12.357 | 12.022 | 12.186 | 1.00 | 0.00 | H |
| ATOM | 1466 | 2HA  | GLY | 96  | -10.251 | 13.029 | 12.166 | 1.00 | 0.00 | H |
| ATOM | 1467 | 3HA  | GLY | 96  | -10.895 | 14.339 | 13.142 | 1.00 | 0.00 | H |
| ATOM | 1468 | N    | ASN | 97  | -10.383 | 11.346 | 14.410 | 1.00 | 0.00 | N |
| ATOM | 1469 | CA   | ASN | 97  | -9.827  | 10.640 | 15.561 | 1.00 | 0.00 | C |
| ATOM | 1470 | C    | ASN | 97  | -8.566  | 9.873  | 15.170 | 1.00 | 0.00 | C |
| ATOM | 1471 | O    | ASN | 97  | -7.564  | 9.903  | 15.883 | 1.00 | 0.00 | O |
| ATOM | 1472 | CB   | ASN | 97  | -10.863 | 9.679  | 16.145 | 1.00 | 0.00 | C |
| ATOM | 1473 | CG   | ASN | 97  | -10.980 | 8.396  | 15.344 | 1.00 | 0.00 | C |
| ATOM | 1474 | OD1  | ASN | 97  | -11.354 | 8.418  | 14.172 | 1.00 | 0.00 | O |
| ATOM | 1475 | ND2  | ASN | 97  | -10.659 | 7.273  | 15.975 | 1.00 | 0.00 | N |
| ATOM | 1476 | H    | ASN | 97  | -10.878 | 10.838 | 13.734 | 1.00 | 0.00 | H |
| ATOM | 1477 | HA   | ASN | 97  | -9.569  | 11.376 | 16.307 | 1.00 | 0.00 | H |
| ATOM | 1478 | 2HB3 | ASN | 97  | -11.828 | 10.163 | 16.159 | 1.00 | 0.00 | H |
| ATOM | 1479 | 1HD2 | ASN | 97  | -10.369 | 7.333  | 16.909 | 1.00 | 0.00 | H |
| ATOM | 1480 | 2HD2 | ASN | 97  | -10.726 | 6.428  | 15.480 | 1.00 | 0.00 | H |
| ATOM | 1481 | HB2  | ASN | 97  | -10.571 | 9.400  | 17.157 | 1.00 | 0.00 | H |
| ATOM | 1482 | N    | GLY | 98  | -8.626  | 9.186  | 14.033 | 1.00 | 0.00 | N |
| ATOM | 1483 | CA   | GLY | 98  | -7.485  | 8.420  | 13.569 | 1.00 | 0.00 | C |
| ATOM | 1484 | C    | GLY | 98  | -7.884  | 7.282  | 12.652 | 1.00 | 0.00 | C |
| ATOM | 1485 | O    | GLY | 98  | -7.218  | 7.018  | 11.651 | 1.00 | 0.00 | O |
| ATOM | 1486 | H    | GLY | 98  | -9.454  | 9.198  | 13.508 | 1.00 | 0.00 | H |
| ATOM | 1487 | 2HA  | GLY | 98  | -6.816  | 9.080  | 13.036 | 1.00 | 0.00 | H |
| ATOM | 1488 | 3HA  | GLY | 98  | -6.967  | 8.014  | 14.425 | 1.00 | 0.00 | H |
| ATOM | 1489 | N    | TYR | 99  | -8.974  | 6.604  | 12.993 | 1.00 | 0.00 | N |
| ATOM | 1490 | CA   | TYR | 99  | -9.461  | 5.486  | 12.195 | 1.00 | 0.00 | C |
| ATOM | 1491 | C    | TYR | 99  | -10.619 | 5.916  | 11.300 | 1.00 | 0.00 | C |
| ATOM | 1492 | O    | TYR | 99  | -11.532 | 6.614  | 11.740 | 1.00 | 0.00 | O |
| ATOM | 1493 | CB   | TYR | 99  | -9.904  | 4.339  | 13.104 | 1.00 | 0.00 | C |
| ATOM | 1494 | CG   | TYR | 99  | -8.752  | 3.571  | 13.716 | 1.00 | 0.00 | C |
| ATOM | 1495 | CD1  | TYR | 99  | -7.812  | 4.211  | 14.513 | 1.00 | 0.00 | C |
| ATOM | 1496 | CE1  | TYR | 99  | -6.758  | 3.515  | 15.071 | 1.00 | 0.00 | C |
| ATOM | 1497 | CZ   | TYR | 99  | -6.638  | 2.160  | 14.842 | 1.00 | 0.00 | C |
| ATOM | 1498 | CE2  | TYR | 99  | -7.560  | 1.502  | 14.056 | 1.00 | 0.00 | C |
| ATOM | 1499 | CD2  | TYR | 99  | -8.608  | 2.207  | 13.499 | 1.00 | 0.00 | C |
| ATOM | 1500 | OH   | TYR | 99  | -5.589  | 1.462  | 15.400 | 1.00 | 0.00 | O |
| ATOM | 1501 | H    | TYR | 99  | -9.465  | 6.862  | 13.800 | 1.00 | 0.00 | H |
| ATOM | 1502 | HA   | TYR | 99  | -8.647  | 5.144  | 11.573 | 1.00 | 0.00 | H |
| ATOM | 1503 | 2HB3 | TYR | 99  | -10.497 | 3.642  | 12.530 | 1.00 | 0.00 | H |
| ATOM | 1504 | 1HD  | TYR | 99  | -7.911  | 5.272  | 14.689 | 1.00 | 0.00 | H |
| ATOM | 1505 | 1HE  | TYR | 99  | -6.035  | 4.030  | 15.686 | 1.00 | 0.00 | H |
| ATOM | 1506 | 2HE  | TYR | 99  | -7.464  | 0.441  | 13.877 | 1.00 | 0.00 | H |
| ATOM | 1507 | 2HD  | TYR | 99  | -9.333  | 1.693  | 12.883 | 1.00 | 0.00 | H |
| ATOM | 1508 | HH   | TYR | 99  | -4.780  | 1.971  | 15.306 | 1.00 | 0.00 | H |
| ATOM | 1509 | HB2  | TYR | 99  | -10.491 | 4.734  | 13.932 | 1.00 | 0.00 | H |
| ATOM | 1510 | N    | ILE | 100 | -10.572 | 5.494  | 10.039 | 1.00 | 0.00 | N |
| ATOM | 1511 | CA   | ILE | 100 | -11.617 | 5.834  | 9.082  | 1.00 | 0.00 | C |
| ATOM | 1512 | C    | ILE | 100 | -12.621 | 4.697  | 8.938  | 1.00 | 0.00 | C |
| ATOM | 1513 | O    | ILE | 100 | -12.378 | 3.727  | 8.218  | 1.00 | 0.00 | O |
| ATOM | 1514 | CB   | ILE | 100 | -11.027 | 6.165  | 7.698  | 1.00 | 0.00 | C |
| ATOM | 1515 | CG2  | ILE | 100 | -12.141 | 6.477  | 6.710  | 1.00 | 0.00 | C |
| ATOM | 1516 | CG1  | ILE | 100 | -10.052 | 7.337  | 7.801  | 1.00 | 0.00 | C |
| ATOM | 1517 | CD1  | ILE | 100 | -9.156  | 7.488  | 6.591  | 1.00 | 0.00 | C |
| ATOM | 1518 | H    | ILE | 100 | -9.819  | 4.942  | 9.749  | 1.00 | 0.00 | H |
| ATOM | 1519 | HA   | ILE | 100 | -12.133 | 6.712  | 9.450  | 1.00 | 0.00 | H |
| ATOM | 1520 | HB   | ILE | 100 | -10.496 | 5.294  | 7.343  | 1.00 | 0.00 | H |
| ATOM | 1521 | 1HG2 | ILE | 100 | -11.719 | 6.935  | 5.825  | 1.00 | 0.00 | H |
| ATOM | 1522 | 2HG2 | ILE | 100 | -12.646 | 5.564  | 6.434  | 1.00 | 0.00 | H |
| ATOM | 1523 | 3HG2 | ILE | 100 | -12.846 | 7.156  | 7.165  | 1.00 | 0.00 | H |
| ATOM | 1524 | 2HG3 | ILE | 100 | -9.422  | 7.197  | 8.666  | 1.00 | 0.00 | H |
| ATOM | 1525 | 1HD1 | ILE | 100 | -9.002  | 8.538  | 6.384  | 1.00 | 0.00 | H |
| ATOM | 1526 | 2HD1 | ILE | 100 | -8.206  | 7.013  | 6.785  | 1.00 | 0.00 | H |
| ATOM | 1527 | 3HD1 | ILE | 100 | -9.625  | 7.019  | 5.738  | 1.00 | 0.00 | H |
| ATOM | 1528 | HG2  | ILE | 100 | -10.612 | 8.267  | 7.897  | 1.00 | 0.00 | H |
| ATOM | 1529 | N    | SER | 101 | -13.754 | 4.821  | 9.625  | 1.00 | 0.00 | N |
| ATOM | 1530 | CA   | SER | 101 | -14.795 | 3.802  | 9.573  | 1.00 | 0.00 | C |

|      |      |      |     |     |         |       |        |      |      |   |
|------|------|------|-----|-----|---------|-------|--------|------|------|---|
| ATOM | 1531 | C    | SER | 101 | -15.385 | 3.697 | 8.171  | 1.00 | 0.00 | C |
| ATOM | 1532 | O    | SER | 101 | -15.146 | 4.555 | 7.319  | 1.00 | 0.00 | O |
| ATOM | 1533 | CB   | SER | 101 | -15.900 | 4.123 | 10.581 | 1.00 | 0.00 | C |
| ATOM | 1534 | OG   | SER | 101 | -16.464 | 5.399 | 10.331 | 1.00 | 0.00 | O |
| ATOM | 1535 | H    | SER | 101 | -13.890 | 5.619 | 10.178 | 1.00 | 0.00 | H |
| ATOM | 1536 | HA   | SER | 101 | -14.346 | 2.855 | 9.833  | 1.00 | 0.00 | H |
| ATOM | 1537 | 2HB3 | SER | 101 | -15.488 | 4.114 | 11.580 | 1.00 | 0.00 | H |
| ATOM | 1538 | HG   | SER | 101 | -15.811 | 6.078 | 10.507 | 1.00 | 0.00 | H |
| ATOM | 1539 | HB2  | SER | 101 | -16.689 | 3.375 | 10.505 | 1.00 | 0.00 | H |
| ATOM | 1540 | N    | ALA | 102 | -16.155 | 2.639 | 7.937  | 1.00 | 0.00 | N |
| ATOM | 1541 | CA   | ALA | 102 | -16.780 | 2.422 | 6.638  | 1.00 | 0.00 | C |
| ATOM | 1542 | C    | ALA | 102 | -17.735 | 3.559 | 6.293  | 1.00 | 0.00 | C |
| ATOM | 1543 | O    | ALA | 102 | -17.754 | 4.044 | 5.162  | 1.00 | 0.00 | O |
| ATOM | 1544 | CB   | ALA | 102 | -17.516 | 1.090 | 6.622  | 1.00 | 0.00 | C |
| ATOM | 1545 | H    | ALA | 102 | -16.307 | 1.991 | 8.654  | 1.00 | 0.00 | H |
| ATOM | 1546 | HA   | ALA | 102 | -15.998 | 2.384 | 5.894  | 1.00 | 0.00 | H |
| ATOM | 1547 | 1HB  | ALA | 102 | -16.833 | 0.307 | 6.321  | 1.00 | 0.00 | H |
| ATOM | 1548 | 2HB  | ALA | 102 | -17.894 | 0.877 | 7.613  | 1.00 | 0.00 | H |
| ATOM | 1549 | 3HB  | ALA | 102 | -18.336 | 1.141 | 5.925  | 1.00 | 0.00 | H |
| ATOM | 1550 | N    | ALA | 103 | -18.528 | 3.981 | 7.273  | 1.00 | 0.00 | N |
| ATOM | 1551 | CA   | ALA | 103 | -19.485 | 5.061 | 7.072  | 1.00 | 0.00 | C |
| ATOM | 1552 | C    | ALA | 103 | -18.773 | 6.373 | 6.750  | 1.00 | 0.00 | C |
| ATOM | 1553 | O    | ALA | 103 | -19.124 | 7.060 | 5.792  | 1.00 | 0.00 | O |
| ATOM | 1554 | CB   | ALA | 103 | -20.364 | 5.224 | 8.304  | 1.00 | 0.00 | C |
| ATOM | 1555 | H    | ALA | 103 | -18.465 | 3.554 | 8.154  | 1.00 | 0.00 | H |
| ATOM | 1556 | HA   | ALA | 103 | -20.118 | 4.794 | 6.239  | 1.00 | 0.00 | H |
| ATOM | 1557 | 1HB  | ALA | 103 | -21.012 | 6.078 | 8.170  | 1.00 | 0.00 | H |
| ATOM | 1558 | 2HB  | ALA | 103 | -20.958 | 4.335 | 8.440  | 1.00 | 0.00 | H |
| ATOM | 1559 | 3HB  | ALA | 103 | -19.740 | 5.378 | 9.171  | 1.00 | 0.00 | H |
| ATOM | 1560 | N    | GLU | 104 | -17.771 | 6.711 | 7.558  | 1.00 | 0.00 | N |
| ATOM | 1561 | CA   | GLU | 104 | -17.013 | 7.939 | 7.358  | 1.00 | 0.00 | C |
| ATOM | 1562 | C    | GLU | 104 | -16.501 | 8.036 | 5.925  | 1.00 | 0.00 | C |
| ATOM | 1563 | O    | GLU | 104 | -16.770 | 9.010 | 5.220  | 1.00 | 0.00 | O |
| ATOM | 1564 | CB   | GLU | 104 | -15.838 | 8.004 | 8.336  | 1.00 | 0.00 | C |
| ATOM | 1565 | CG   | GLU | 104 | -16.223 | 8.510 | 9.716  | 1.00 | 0.00 | C |
| ATOM | 1566 | CD   | GLU | 104 | -15.020 | 8.732 | 10.612 | 1.00 | 0.00 | C |
| ATOM | 1567 | OE1  | GLU | 104 | -14.063 | 9.400 | 10.165 | 1.00 | 0.00 | O |
| ATOM | 1568 | OE2  | GLU | 104 | -15.034 | 8.240 | 11.758 | 1.00 | 0.00 | O |
| ATOM | 1569 | H    | GLU | 104 | -17.540 | 6.121 | 8.303  | 1.00 | 0.00 | H |
| ATOM | 1570 | HA   | GLU | 104 | -17.673 | 8.772 | 7.549  | 1.00 | 0.00 | H |
| ATOM | 1571 | 2HB3 | GLU | 104 | -15.086 | 8.665 | 7.931  | 1.00 | 0.00 | H |
| ATOM | 1572 | 2HG3 | GLU | 104 | -16.872 | 7.784 | 10.183 | 1.00 | 0.00 | H |
| ATOM | 1573 | HB2  | GLU | 104 | -15.427 | 7.004 | 8.477  | 1.00 | 0.00 | H |
| ATOM | 1574 | HG2  | GLU | 104 | -16.733 | 9.468 | 9.623  | 1.00 | 0.00 | H |
| ATOM | 1575 | N    | LEU | 105 | -15.762 | 7.020 | 5.497  | 1.00 | 0.00 | N |
| ATOM | 1576 | CA   | LEU | 105 | -15.209 | 6.986 | 4.146  | 1.00 | 0.00 | C |
| ATOM | 1577 | C    | LEU | 105 | -16.321 | 6.888 | 3.106  | 1.00 | 0.00 | C |
| ATOM | 1578 | O    | LEU | 105 | -16.315 | 7.606 | 2.105  | 1.00 | 0.00 | O |
| ATOM | 1579 | CB   | LEU | 105 | -14.247 | 5.810 | 3.993  | 1.00 | 0.00 | C |
| ATOM | 1580 | CG   | LEU | 105 | -13.833 | 5.461 | 2.564  | 1.00 | 0.00 | C |
| ATOM | 1581 | CD1  | LEU | 105 | -12.439 | 4.852 | 2.546  | 1.00 | 0.00 | C |
| ATOM | 1582 | CD2  | LEU | 105 | -14.841 | 4.511 | 1.933  | 1.00 | 0.00 | C |
| ATOM | 1583 | H    | LEU | 105 | -15.580 | 6.270 | 6.102  | 1.00 | 0.00 | H |
| ATOM | 1584 | HA   | LEU | 105 | -14.667 | 7.907 | 3.988  | 1.00 | 0.00 | H |
| ATOM | 1585 | 2HB3 | LEU | 105 | -14.721 | 4.937 | 4.424  | 1.00 | 0.00 | H |
| ATOM | 1586 | HG   | LEU | 105 | -13.808 | 6.366 | 1.973  | 1.00 | 0.00 | H |
| ATOM | 1587 | 1HD1 | LEU | 105 | -11.763 | 5.515 | 2.028  | 1.00 | 0.00 | H |
| ATOM | 1588 | 2HD1 | LEU | 105 | -12.471 | 3.901 | 2.034  | 1.00 | 0.00 | H |
| ATOM | 1589 | 3HD1 | LEU | 105 | -12.097 | 4.705 | 3.559  | 1.00 | 0.00 | H |
| ATOM | 1590 | 1HD2 | LEU | 105 | -14.368 | 3.969 | 1.129  | 1.00 | 0.00 | H |
| ATOM | 1591 | 2HD2 | LEU | 105 | -15.674 | 5.078 | 1.544  | 1.00 | 0.00 | H |
| ATOM | 1592 | 3HD2 | LEU | 105 | -15.196 | 3.816 | 2.680  | 1.00 | 0.00 | H |
| ATOM | 1593 | HB2  | LEU | 105 | -13.309 | 6.039 | 4.499  | 1.00 | 0.00 | H |
| ATOM | 1594 | N    | ARG | 106 | -17.277 | 5.996 | 3.351  | 1.00 | 0.00 | N |
| ATOM | 1595 | CA   | ARG | 106 | -18.396 | 5.804 | 2.438  | 1.00 | 0.00 | C |
| ATOM | 1596 | C    | ARG | 106 | -18.931 | 7.146 | 1.944  | 1.00 | 0.00 | C |
| ATOM | 1597 | O    | ARG | 106 | -19.072 | 7.364 | 0.740  | 1.00 | 0.00 | O |
| ATOM | 1598 | CB   | ARG | 106 | -19.512 | 5.019 | 3.125  | 1.00 | 0.00 | C |
| ATOM | 1599 | CG   | ARG | 106 | -20.723 | 4.775 | 2.235  | 1.00 | 0.00 | C |
| ATOM | 1600 | CD   | ARG | 106 | -21.955 | 4.428 | 3.053  | 1.00 | 0.00 | C |
| ATOM | 1601 | NE   | ARG | 106 | -23.172 | 4.448 | 2.245  | 1.00 | 0.00 | N |
| ATOM | 1602 | CZ   | ARG | 106 | -24.275 | 3.779 | 2.563  | 1.00 | 0.00 | C |
| ATOM | 1603 | NH1  | ARG | 106 | -24.316 | 3.044 | 3.665  | 1.00 | 0.00 | N |
| ATOM | 1604 | NH2  | ARG | 106 | -25.343 | 3.850 | 1.778  | 1.00 | 0.00 | N |
| ATOM | 1605 | H    | ARG | 106 | -17.227 | 5.455 | 4.168  | 1.00 | 0.00 | H |
| ATOM | 1606 | HA   | ARG | 106 | -18.038 | 5.241 | 1.589  | 1.00 | 0.00 | H |
| ATOM | 1607 | 2HB3 | ARG | 106 | -19.838 | 5.566 | 3.996  | 1.00 | 0.00 | H |

|      |      |      |      |     |         |        |        |      |      |   |
|------|------|------|------|-----|---------|--------|--------|------|------|---|
| ATOM | 1608 | 2HG3 | ARG  | 106 | -20.505 | 3.958  | 1.564  | 1.00 | 0.00 | H |
| ATOM | 1609 | 2HD3 | ARG  | 106 | -22.052 | 5.146  | 3.853  | 1.00 | 0.00 | H |
| ATOM | 1610 | HE   | ARG  | 106 | -23.165 | 4.986  | 1.428  | 1.00 | 0.00 | H |
| ATOM | 1611 | 1HH1 | ARG  | 106 | -23.512 | 2.993  | 4.260  | 1.00 | 0.00 | H |
| ATOM | 1612 | 2HH1 | ARG  | 106 | -25.146 | 2.543  | 3.903  | 1.00 | 0.00 | H |
| ATOM | 1613 | 1HH2 | ARG  | 106 | -25.316 | 4.403  | 0.945  | 1.00 | 0.00 | H |
| ATOM | 1614 | 2HH2 | ARG  | 106 | -26.171 | 3.346  | 2.017  | 1.00 | 0.00 | H |
| ATOM | 1615 | HB2  | ARG  | 106 | -19.141 | 4.035  | 3.412  | 1.00 | 0.00 | H |
| ATOM | 1616 | HG2  | ARG  | 106 | -20.942 | 5.677  | 1.665  | 1.00 | 0.00 | H |
| ATOM | 1617 | HD2  | ARG  | 106 | -21.850 | 3.422  | 3.460  | 1.00 | 0.00 | H |
| ATOM | 1618 | N    | HI S | 107 | -19.228 | 8.040  | 2.881  | 1.00 | 0.00 | N |
| ATOM | 1619 | CA   | HI S | 107 | -19.747 | 9.359  | 2.543  | 1.00 | 0.00 | C |
| ATOM | 1620 | C    | HI S | 107 | -18.791 | 10.096 | 1.612  | 1.00 | 0.00 | C |
| ATOM | 1621 | O    | HI S | 107 | -19.196 | 10.610 | 0.568  | 1.00 | 0.00 | O |
| ATOM | 1622 | CB   | HI S | 107 | -19.980 | 10.180 | 3.810  | 1.00 | 0.00 | C |
| ATOM | 1623 | CG   | HI S | 107 | -19.949 | 11.660 | 3.581  | 1.00 | 0.00 | C |
| ATOM | 1624 | ND1  | HI S | 107 | -20.757 | 12.296 | 2.661  | 1.00 | 0.00 | N |
| ATOM | 1625 | CD2  | HI S | 107 | -19.203 | 12.632 | 4.157  | 1.00 | 0.00 | C |
| ATOM | 1626 | CE1  | HI S | 107 | -20.507 | 13.593 | 2.681  | 1.00 | 0.00 | C |
| ATOM | 1627 | NE2  | HI S | 107 | -19.569 | 13.822 | 3.580  | 1.00 | 0.00 | N |
| ATOM | 1628 | H    | HI S | 107 | -19.094 | 7.806  | 3.824  | 1.00 | 0.00 | H |
| ATOM | 1629 | HA   | HI S | 107 | -20.689 | 9.223  | 2.035  | 1.00 | 0.00 | H |
| ATOM | 1630 | 2HB3 | HI S | 107 | -19.212 | 9.941  | 4.533  | 1.00 | 0.00 | H |
| ATOM | 1631 | 1HD  | HI S | 107 | -21.414 | 11.861 | 2.080  | 1.00 | 0.00 | H |
| ATOM | 1632 | 2HD  | HI S | 107 | -18.458 | 12.494 | 4.927  | 1.00 | 0.00 | H |
| ATOM | 1633 | 1HE  | HI S | 107 | -20.989 | 14.338 | 2.068  | 1.00 | 0.00 | H |
| ATOM | 1634 | 2HE  | HI S | 107 | -19.137 | 14.687 | 3.739  | 1.00 | 0.00 | H |
| ATOM | 1635 | HB2  | HI S | 107 | -20.963 | 9.947  | 4.220  | 1.00 | 0.00 | H |
| ATOM | 1636 | N    | VAL  | 108 | -17.519 | 10.150 | 1.997  | 1.00 | 0.00 | N |
| ATOM | 1637 | CA   | VAL  | 108 | -16.504 | 10.825 | 1.198  | 1.00 | 0.00 | C |
| ATOM | 1638 | C    | VAL  | 108 | -16.557 | 10.368 | -0.257 | 1.00 | 0.00 | C |
| ATOM | 1639 | O    | VAL  | 108 | -16.688 | 11.183 | -1.170 | 1.00 | 0.00 | O |
| ATOM | 1640 | CB   | VAL  | 108 | -15.092 | 10.570 | 1.752  | 1.00 | 0.00 | C |
| ATOM | 1641 | CG1  | VAL  | 108 | -14.042 | 11.233 | 0.872  | 1.00 | 0.00 | C |
| ATOM | 1642 | CG2  | VAL  | 108 | -14.986 | 11.068 | 3.188  | 1.00 | 0.00 | C |
| ATOM | 1643 | H    | VAL  | 108 | -17.258 | 9.722  | 2.840  | 1.00 | 0.00 | H |
| ATOM | 1644 | HA   | VAL  | 108 | -16.700 | 11.887 | 1.239  | 1.00 | 0.00 | H |
| ATOM | 1645 | HB   | VAL  | 108 | -14.911 | 9.506  | 1.750  | 1.00 | 0.00 | H |
| ATOM | 1646 | 1HG1 | VAL  | 108 | -13.059 | 11.034 | 1.271  | 1.00 | 0.00 | H |
| ATOM | 1647 | 2HG1 | VAL  | 108 | -14.114 | 10.837 | -0.131 | 1.00 | 0.00 | H |
| ATOM | 1648 | 3HG1 | VAL  | 108 | -14.211 | 12.298 | 0.852  | 1.00 | 0.00 | H |
| ATOM | 1649 | 1HG2 | VAL  | 108 | -14.568 | 10.289 | 3.808  | 1.00 | 0.00 | H |
| ATOM | 1650 | 2HG2 | VAL  | 108 | -14.344 | 11.937 | 3.221  | 1.00 | 0.00 | H |
| ATOM | 1651 | 3HG2 | VAL  | 108 | -15.967 | 11.331 | 3.550  | 1.00 | 0.00 | H |
| ATOM | 1652 | N    | MET  | 109 | -16.453 | 9.060  | -0.465 | 1.00 | 0.00 | N |
| ATOM | 1653 | CA   | MET  | 109 | -16.492 | 8.495  | -1.808 | 1.00 | 0.00 | C |
| ATOM | 1654 | C    | MET  | 109 | -17.642 | 9.087  | -2.615 | 1.00 | 0.00 | C |
| ATOM | 1655 | O    | MET  | 109 | -17.469 | 9.464  | -3.775 | 1.00 | 0.00 | O |
| ATOM | 1656 | CB   | MET  | 109 | -16.632 | 6.973  | -1.739 | 1.00 | 0.00 | C |
| ATOM | 1657 | CG   | MET  | 109 | -15.406 | 6.273  | -1.176 | 1.00 | 0.00 | C |
| ATOM | 1658 | SD   | MET  | 109 | -14.208 | 5.835  | -2.453 | 1.00 | 0.00 | S |
| ATOM | 1659 | CE   | MET  | 109 | -12.934 | 5.054  | -1.468 | 1.00 | 0.00 | C |
| ATOM | 1660 | H    | MET  | 109 | -16.352 | 8.458  | 0.304  | 1.00 | 0.00 | H |
| ATOM | 1661 | HA   | MET  | 109 | -15.561 | 8.739  | -2.296 | 1.00 | 0.00 | H |
| ATOM | 1662 | 2HB3 | MET  | 109 | -16.810 | 6.595  | -2.735 | 1.00 | 0.00 | H |
| ATOM | 1663 | 2HG3 | MET  | 109 | -15.722 | 5.370  | -0.676 | 1.00 | 0.00 | H |
| ATOM | 1664 | 1HE  | MET  | 109 | -13.170 | 4.011  | -1.333 | 1.00 | 0.00 | H |
| ATOM | 1665 | 2HE  | MET  | 109 | -11.981 | 5.147  | -1.970 | 1.00 | 0.00 | H |
| ATOM | 1666 | 3HE  | MET  | 109 | -12.879 | 5.537  | -0.501 | 1.00 | 0.00 | H |
| ATOM | 1667 | HB2  | MET  | 109 | -17.463 | 6.713  | -1.082 | 1.00 | 0.00 | H |
| ATOM | 1668 | HG2  | MET  | 109 | -14.898 | 6.936  | -0.477 | 1.00 | 0.00 | H |
| ATOM | 1669 | N    | THR  | 110 | -18.815 | 9.167  | -1.995 | 1.00 | 0.00 | N |
| ATOM | 1670 | CA   | THR  | 110 | -19.993 | 9.714  | -2.657 | 1.00 | 0.00 | C |
| ATOM | 1671 | C    | THR  | 110 | -19.688 | 11.063 | -3.296 | 1.00 | 0.00 | C |
| ATOM | 1672 | O    | THR  | 110 | -19.880 | 11.249 | -4.499 | 1.00 | 0.00 | O |
| ATOM | 1673 | CB   | THR  | 110 | -21.165 | 9.878  | -1.670 | 1.00 | 0.00 | C |
| ATOM | 1674 | OG1  | THR  | 110 | -21.437 | 8.633  | -1.019 | 1.00 | 0.00 | O |
| ATOM | 1675 | CG2  | THR  | 110 | -22.414 | 10.365 | -2.390 | 1.00 | 0.00 | C |
| ATOM | 1676 | H    | THR  | 110 | -18.888 | 8.851  | -1.070 | 1.00 | 0.00 | H |
| ATOM | 1677 | HA   | THR  | 110 | -20.295 | 9.021  | -3.429 | 1.00 | 0.00 | H |
| ATOM | 1678 | HB   | THR  | 110 | -20.889 | 10.613 | -0.926 | 1.00 | 0.00 | H |
| ATOM | 1679 | 1HG  | THR  | 110 | -20.722 | 8.426  | -0.414 | 1.00 | 0.00 | H |
| ATOM | 1680 | 1HG2 | THR  | 110 | -22.262 | 11.379 | -2.730 | 1.00 | 0.00 | H |
| ATOM | 1681 | 2HG2 | THR  | 110 | -23.253 | 10.333 | -1.715 | 1.00 | 0.00 | H |
| ATOM | 1682 | 3HG2 | THR  | 110 | -22.609 | 9.727  | -3.241 | 1.00 | 0.00 | H |
| ATOM | 1683 | N    | ASN  | 111 | -19.213 | 12.004 | -2.487 | 1.00 | 0.00 | N |
| ATOM | 1684 | CA   | ASN  | 111 | -18.881 | 13.337 | -2.976 | 1.00 | 0.00 | C |



|      |      |      |     |     |         |        |         |      |      |   |
|------|------|------|-----|-----|---------|--------|---------|------|------|---|
| ATOM | 1685 | C    | ASN | 111 | -18.268 | 13.268 | -4.370  | 1.00 | 0.00 | C |
| ATOM | 1686 | O    | ASN | 111 | -18.684 | 13.988 | -5.280  | 1.00 | 0.00 | O |
| ATOM | 1687 | CB   | ASN | 111 | -17.911 | 14.028 | -2.013  | 1.00 | 0.00 | C |
| ATOM | 1688 | CG   | ASN | 111 | -18.604 | 14.546 | -0.769  | 1.00 | 0.00 | C |
| ATOM | 1689 | OD1  | ASN | 111 | -19.624 | 15.232 | -0.851  | 1.00 | 0.00 | O |
| ATOM | 1690 | ND2  | ASN | 111 | -18.051 | 14.220 | 0.394   | 1.00 | 0.00 | N |
| ATOM | 1691 | H    | ASN | 111 | -19.081 | 11.796 | -1.538  | 1.00 | 0.00 | H |
| ATOM | 1692 | HA   | ASN | 111 | -19.796 | 13.910 | -3.024  | 1.00 | 0.00 | H |
| ATOM | 1693 | 2HB3 | ASN | 111 | -17.446 | 14.862 | -2.518  | 1.00 | 0.00 | H |
| ATOM | 1694 | 1HD2 | ASN | 111 | -17.238 | 13.673 | 0.383   | 1.00 | 0.00 | H |
| ATOM | 1695 | 2HD2 | ASN | 111 | -18.478 | 14.542 | 1.215   | 1.00 | 0.00 | H |
| ATOM | 1696 | HB2  | ASN | 111 | -17.150 | 13.317 | -1.692  | 1.00 | 0.00 | H |
| ATOM | 1697 | N    | LEU | 112 | -17.278 | 12.397 | -4.534  | 1.00 | 0.00 | N |
| ATOM | 1698 | CA   | LEU | 112 | -16.607 | 12.233 | -5.820  | 1.00 | 0.00 | C |
| ATOM | 1699 | C    | LEU | 112 | -17.605 | 12.331 | -6.970  | 1.00 | 0.00 | C |
| ATOM | 1700 | O    | LEU | 112 | -17.349 | 12.999 | -7.971  | 1.00 | 0.00 | O |
| ATOM | 1701 | CB   | LEU | 112 | -15.883 | 10.888 | -5.870  | 1.00 | 0.00 | C |
| ATOM | 1702 | CG   | LEU | 112 | -14.748 | 10.697 | -4.865  | 1.00 | 0.00 | C |
| ATOM | 1703 | CD1  | LEU | 112 | -14.191 | 9.284  | -4.948  | 1.00 | 0.00 | C |
| ATOM | 1704 | CD2  | LEU | 112 | -13.647 | 11.720 | -5.103  | 1.00 | 0.00 | C |
| ATOM | 1705 | H    | LEU | 112 | -16.992 | 11.851 | -3.775  | 1.00 | 0.00 | H |
| ATOM | 1706 | HA   | LEU | 112 | -15.883 | 13.027 | -5.921  | 1.00 | 0.00 | H |
| ATOM | 1707 | 2HB3 | LEU | 112 | -15.471 | 10.773 | -6.863  | 1.00 | 0.00 | H |
| ATOM | 1708 | HG   | LEU | 112 | -15.132 | 10.846 | -3.866  | 1.00 | 0.00 | H |
| ATOM | 1709 | 1HD1 | LEU | 112 | -13.380 | 9.174  | -4.243  | 1.00 | 0.00 | H |
| ATOM | 1710 | 2HD1 | LEU | 112 | -13.827 | 9.100  | -5.948  | 1.00 | 0.00 | H |
| ATOM | 1711 | 3HD1 | LEU | 112 | -14.972 | 8.576  | -4.713  | 1.00 | 0.00 | H |
| ATOM | 1712 | 1HD2 | LEU | 112 | -12.684 | 11.239 | -5.027  | 1.00 | 0.00 | H |
| ATOM | 1713 | 2HD2 | LEU | 112 | -13.716 | 12.504 | -4.361  | 1.00 | 0.00 | H |
| ATOM | 1714 | 3HD2 | LEU | 112 | -13.760 | 12.148 | -6.089  | 1.00 | 0.00 | H |
| ATOM | 1715 | HB2  | LEU | 112 | -16.586 | 10.087 | -5.641  | 1.00 | 0.00 | H |
| ATOM | 1716 | N    | GLY | 113 | -18.743 | 11.661 | -6.819  | 1.00 | 0.00 | N |
| ATOM | 1717 | CA   | GLY | 113 | -19.764 | 11.687 | -7.852  | 1.00 | 0.00 | C |
| ATOM | 1718 | C    | GLY | 113 | -20.317 | 10.310 | -8.154  | 1.00 | 0.00 | C |
| ATOM | 1719 | O    | GLY | 113 | -20.529 | 9.961  | -9.315  | 1.00 | 0.00 | O |
| ATOM | 1720 | H    | GLY | 113 | -18.891 | 11.145 | -6.000  | 1.00 | 0.00 | H |
| ATOM | 1721 | 2HA  | GLY | 113 | -20.572 | 12.326 | -7.528  | 1.00 | 0.00 | H |
| ATOM | 1722 | 3HA  | GLY | 113 | -19.333 | 12.096 | -8.756  | 1.00 | 0.00 | H |
| ATOM | 1723 | N    | GLU | 114 | -20.551 | 9.524  | -7.108  | 1.00 | 0.00 | N |
| ATOM | 1724 | CA   | GLU | 114 | -21.080 | 8.176  | -7.268  | 1.00 | 0.00 | C |
| ATOM | 1725 | C    | GLU | 114 | -21.887 | 7.758  | -6.043  | 1.00 | 0.00 | C |
| ATOM | 1726 | O    | GLU | 114 | -21.803 | 8.383  | -4.986  | 1.00 | 0.00 | O |
| ATOM | 1727 | CB   | GLU | 114 | -19.944 | 7.180  | -7.507  | 1.00 | 0.00 | C |
| ATOM | 1728 | CG   | GLU | 114 | -19.186 | 7.420  | -8.802  | 1.00 | 0.00 | C |
| ATOM | 1729 | CD   | GLU | 114 | -20.000 | 7.060  | -10.029 | 1.00 | 0.00 | C |
| ATOM | 1730 | OE1  | GLU | 114 | -20.951 | 6.261  | -9.895  | 1.00 | 0.00 | O |
| ATOM | 1731 | OE2  | GLU | 114 | -19.686 | 7.573  | -11.123 | 1.00 | 0.00 | O |
| ATOM | 1732 | H    | GLU | 114 | -20.361 | 9.859  | -6.207  | 1.00 | 0.00 | H |
| ATOM | 1733 | HA   | GLU | 114 | -21.733 | 8.177  | -8.130  | 1.00 | 0.00 | H |
| ATOM | 1734 | 2HB3 | GLU | 114 | -20.355 | 6.183  | -7.534  | 1.00 | 0.00 | H |
| ATOM | 1735 | 2HG3 | GLU | 114 | -18.288 | 6.822  | -8.794  | 1.00 | 0.00 | H |
| ATOM | 1736 | HB2  | GLU | 114 | -19.210 | 7.266  | -6.704  | 1.00 | 0.00 | H |
| ATOM | 1737 | HG2  | GLU | 114 | -18.934 | 8.478  | -8.886  | 1.00 | 0.00 | H |
| ATOM | 1738 | N    | LYS | 115 | -22.674 | 6.698  | -6.191  | 1.00 | 0.00 | N |
| ATOM | 1739 | CA   | LYS | 115 | -23.496 | 6.193  | -5.097  | 1.00 | 0.00 | C |
| ATOM | 1740 | C    | LYS | 115 | -23.103 | 4.765  | -4.735  | 1.00 | 0.00 | C |
| ATOM | 1741 | O    | LYS | 115 | -23.482 | 3.813  | -5.416  | 1.00 | 0.00 | O |
| ATOM | 1742 | CB   | LYS | 115 | -24.975 | 6.244  | -5.481  | 1.00 | 0.00 | C |
| ATOM | 1743 | CG   | LYS | 115 | -25.536 | 7.654  | -5.560  | 1.00 | 0.00 | C |
| ATOM | 1744 | CD   | LYS | 115 | -26.741 | 7.726  | -6.483  | 1.00 | 0.00 | C |
| ATOM | 1745 | CE   | LYS | 115 | -27.444 | 9.072  | -6.379  | 1.00 | 0.00 | C |
| ATOM | 1746 | NZ   | LYS | 115 | -26.867 | 10.070 | -7.321  | 1.00 | 0.00 | N |
| ATOM | 1747 | H    | LYS | 115 | -22.700 | 6.240  | -7.059  | 1.00 | 0.00 | H |
| ATOM | 1748 | HA   | LYS | 115 | -23.333 | 6.828  | -4.241  | 1.00 | 0.00 | H |
| ATOM | 1749 | 2HB3 | LYS | 115 | -25.546 | 5.694  | -4.746  | 1.00 | 0.00 | H |
| ATOM | 1750 | 2HG3 | LYS | 115 | -24.768 | 8.317  | -5.932  | 1.00 | 0.00 | H |
| ATOM | 1751 | 2HD3 | LYS | 115 | -27.437 | 6.944  | -6.211  | 1.00 | 0.00 | H |
| ATOM | 1752 | 2HE3 | LYS | 115 | -27.341 | 9.441  | -5.369  | 1.00 | 0.00 | H |
| ATOM | 1753 | 1HZ  | LYS | 115 | -27.418 | 10.089 | -8.203  | 1.00 | 0.00 | H |
| ATOM | 1754 | 2HZ  | LYS | 115 | -25.882 | 9.824  | -7.547  | 1.00 | 0.00 | H |
| ATOM | 1755 | 3HZ  | LYS | 115 | -26.887 | 11.018 | -6.892  | 1.00 | 0.00 | H |
| ATOM | 1756 | HB2  | LYS | 115 | -25.111 | 5.808  | -6.471  | 1.00 | 0.00 | H |
| ATOM | 1757 | HG2  | LYS | 115 | -25.855 | 7.975  | -4.568  | 1.00 | 0.00 | H |
| ATOM | 1758 | HD2  | LYS | 115 | -26.417 | 7.596  | -7.514  | 1.00 | 0.00 | H |
| ATOM | 1759 | HE2  | LYS | 115 | -28.496 | 8.953  | -6.632  | 1.00 | 0.00 | H |
| ATOM | 1760 | N    | LEU | 116 | -22.342 | 4.622  | -3.655  | 1.00 | 0.00 | N |
| ATOM | 1761 | CA   | LEU | 116 | -21.899 | 3.310  | -3.199  | 1.00 | 0.00 | C |

|      |      |      |     |     |         |        |        |      |      |   |
|------|------|------|-----|-----|---------|--------|--------|------|------|---|
| ATOM | 1762 | C    | LEU | 116 | -22.714 | 2.848  | -1.995 | 1.00 | 0.00 | C |
| ATOM | 1763 | O    | LEU | 116 | -23.336 | 3.655  | -1.305 | 1.00 | 0.00 | O |
| ATOM | 1764 | CB   | LEU | 116 | -20.414 | 3.348  | -2.838 | 1.00 | 0.00 | C |
| ATOM | 1765 | CG   | LEU | 116 | -19.476 | 3.902  | -3.912 | 1.00 | 0.00 | C |
| ATOM | 1766 | CD1  | LEU | 116 | -18.158 | 4.344  | -3.295 | 1.00 | 0.00 | C |
| ATOM | 1767 | CD2  | LEU | 116 | -19.236 | 2.866  | -5.001 | 1.00 | 0.00 | C |
| ATOM | 1768 | H    | LEU | 116 | -22.072 | 5.418  | -3.150 | 1.00 | 0.00 | H |
| ATOM | 1769 | HA   | LEU | 116 | -22.048 | 2.610  | -4.009 | 1.00 | 0.00 | H |
| ATOM | 1770 | 2HB3 | LEU | 116 | -20.103 | 2.337  | -2.617 | 1.00 | 0.00 | H |
| ATOM | 1771 | HG   | LEU | 116 | -19.936 | 4.769  | -4.369 | 1.00 | 0.00 | H |
| ATOM | 1772 | 1HD1 | LEU | 116 | -18.322 | 5.221  | -2.687 | 1.00 | 0.00 | H |
| ATOM | 1773 | 2HD1 | LEU | 116 | -17.454 | 4.578  | -4.078 | 1.00 | 0.00 | H |
| ATOM | 1774 | 3HD1 | LEU | 116 | -17.764 | 3.547  | -2.682 | 1.00 | 0.00 | H |
| ATOM | 1775 | 1HD2 | LEU | 116 | -18.944 | 1.931  | -4.546 | 1.00 | 0.00 | H |
| ATOM | 1776 | 2HD2 | LEU | 116 | -18.450 | 3.209  | -5.656 | 1.00 | 0.00 | H |
| ATOM | 1777 | 3HD2 | LEU | 116 | -20.145 | 2.723  | -5.568 | 1.00 | 0.00 | H |
| ATOM | 1778 | HB2  | LEU | 116 | -20.264 | 4.002  | -1.979 | 1.00 | 0.00 | H |
| ATOM | 1779 | N    | THR | 117 | -22.706 | 1.541  | -1.748 | 1.00 | 0.00 | N |
| ATOM | 1780 | CA   | THR | 117 | -23.442 | 0.971  | -0.627 | 1.00 | 0.00 | C |
| ATOM | 1781 | C    | THR | 117 | -22.516 | 0.192  | 0.301  | 1.00 | 0.00 | C |
| ATOM | 1782 | O    | THR | 117 | -21.411 | -0.187 | -0.084 | 1.00 | 0.00 | O |
| ATOM | 1783 | CB   | THR | 117 | -24.568 | 0.038  | -1.111 | 1.00 | 0.00 | C |
| ATOM | 1784 | OG1  | THR | 117 | -24.035 | -0.954 | -1.997 | 1.00 | 0.00 | O |
| ATOM | 1785 | CG2  | THR | 117 | -25.657 | 0.829  | -1.821 | 1.00 | 0.00 | C |
| ATOM | 1786 | H    | THR | 117 | -22.192 | 0.947  | -2.333 | 1.00 | 0.00 | H |
| ATOM | 1787 | HA   | THR | 117 | -23.889 | 1.783  | -0.073 | 1.00 | 0.00 | H |
| ATOM | 1788 | HB   | THR | 117 | -25.003 | -0.452 | -0.251 | 1.00 | 0.00 | H |
| ATOM | 1789 | 1HG  | THR | 117 | -24.671 | -1.666 | -2.096 | 1.00 | 0.00 | H |
| ATOM | 1790 | 1HG2 | THR | 117 | -25.694 | 1.830  | -1.420 | 1.00 | 0.00 | H |
| ATOM | 1791 | 2HG2 | THR | 117 | -26.610 | 0.344  | -1.669 | 1.00 | 0.00 | H |
| ATOM | 1792 | 3HG2 | THR | 117 | -25.440 | 0.870  | -2.877 | 1.00 | 0.00 | H |
| ATOM | 1793 | N    | ASP | 118 | -22.974 | -0.043 | 1.526  | 1.00 | 0.00 | N |
| ATOM | 1794 | CA   | ASP | 118 | -22.188 | -0.779 | 2.509  | 1.00 | 0.00 | C |
| ATOM | 1795 | C    | ASP | 118 | -21.363 | -1.872 | 1.836  | 1.00 | 0.00 | C |
| ATOM | 1796 | O    | ASP | 118 | -20.193 | -2.065 | 2.157  | 1.00 | 0.00 | O |
| ATOM | 1797 | CB   | ASP | 118 | -23.102 | -1.392 | 3.571  | 1.00 | 0.00 | C |
| ATOM | 1798 | CG   | ASP | 118 | -23.366 | -0.447 | 4.723  | 1.00 | 0.00 | C |
| ATOM | 1799 | OD1  | ASP | 118 | -23.257 | 0.783  | 4.522  | 1.00 | 0.00 | O |
| ATOM | 1800 | OD2  | ASP | 118 | -23.683 | -0.933 | 5.829  | 1.00 | 0.00 | O |
| ATOM | 1801 | H    | ASP | 118 | -23.865 | 0.285  | 1.775  | 1.00 | 0.00 | H |
| ATOM | 1802 | HA   | ASP | 118 | -21.518 | -0.081 | 2.985  | 1.00 | 0.00 | H |
| ATOM | 1803 | 2HB3 | ASP | 118 | -22.640 | -2.289 | 3.960  | 1.00 | 0.00 | H |
| ATOM | 1804 | HB2  | ASP | 118 | -24.068 | -1.632 | 3.125  | 1.00 | 0.00 | H |
| ATOM | 1805 | N    | GLU | 119 | -21.985 | -2.585 | 0.903  | 1.00 | 0.00 | N |
| ATOM | 1806 | CA   | GLU | 119 | -21.308 | -3.661 | 0.184  | 1.00 | 0.00 | C |
| ATOM | 1807 | C    | GLU | 119 | -20.074 | -3.136 | -0.540 | 1.00 | 0.00 | C |
| ATOM | 1808 | O    | GLU | 119 | -18.958 | -3.606 | -0.307 | 1.00 | 0.00 | O |
| ATOM | 1809 | CB   | GLU | 119 | -22.263 | -4.316 | -0.815 | 1.00 | 0.00 | C |
| ATOM | 1810 | CG   | GLU | 119 | -23.413 | -5.060 | -0.160 | 1.00 | 0.00 | C |
| ATOM | 1811 | CD   | GLU | 119 | -22.950 | -6.251 | 0.657  | 1.00 | 0.00 | C |
| ATOM | 1812 | OE1  | GLU | 119 | -22.144 | -7.051 | 0.134  | 1.00 | 0.00 | O |
| ATOM | 1813 | OE2  | GLU | 119 | -23.391 | -6.383 | 1.818  | 1.00 | 0.00 | O |
| ATOM | 1814 | H    | GLU | 119 | -22.920 | -2.385 | 0.690  | 1.00 | 0.00 | H |
| ATOM | 1815 | HA   | GLU | 119 | -20.997 | -4.397 | 0.912  | 1.00 | 0.00 | H |
| ATOM | 1816 | 2HB3 | GLU | 119 | -21.705 | -5.018 | -1.416 | 1.00 | 0.00 | H |
| ATOM | 1817 | 2HG3 | GLU | 119 | -24.084 | -5.410 | -0.930 | 1.00 | 0.00 | H |
| ATOM | 1818 | HB2  | GLU | 119 | -22.712 | -3.549 | -1.444 | 1.00 | 0.00 | H |
| ATOM | 1819 | HG2  | GLU | 119 | -23.938 | -4.391 | 0.521  | 1.00 | 0.00 | H |
| ATOM | 1820 | N    | GLU | 120 | -20.279 | -2.163 | -1.422 | 1.00 | 0.00 | N |
| ATOM | 1821 | CA   | GLU | 120 | -19.184 | -1.577 | -2.183 | 1.00 | 0.00 | C |
| ATOM | 1822 | C    | GLU | 120 | -18.034 | -1.176 | -1.263 | 1.00 | 0.00 | C |
| ATOM | 1823 | O    | GLU | 120 | -16.886 | -1.568 | -1.476 | 1.00 | 0.00 | O |
| ATOM | 1824 | CB   | GLU | 120 | -19.671 | -0.358 | -2.968 | 1.00 | 0.00 | C |
| ATOM | 1825 | CG   | GLU | 120 | -20.752 | -0.682 | -3.985 | 1.00 | 0.00 | C |
| ATOM | 1826 | CD   | GLU | 120 | -20.465 | -1.956 | -4.756 | 1.00 | 0.00 | C |
| ATOM | 1827 | OE1  | GLU | 120 | -20.771 | -3.047 | -4.227 | 1.00 | 0.00 | O |
| ATOM | 1828 | OE2  | GLU | 120 | -19.935 | -1.865 | -5.882 | 1.00 | 0.00 | O |
| ATOM | 1829 | H    | GLU | 120 | -21.191 | -1.833 | -1.563 | 1.00 | 0.00 | H |
| ATOM | 1830 | HA   | GLU | 120 | -18.827 | -2.322 | -2.879 | 1.00 | 0.00 | H |
| ATOM | 1831 | 2HB3 | GLU | 120 | -18.832 | 0.079  | -3.489 | 1.00 | 0.00 | H |
| ATOM | 1832 | 2HG3 | GLU | 120 | -20.823 | 0.137  | -4.689 | 1.00 | 0.00 | H |
| ATOM | 1833 | HB2  | GLU | 120 | -20.108 | 0.365  | -2.279 | 1.00 | 0.00 | H |
| ATOM | 1834 | HG2  | GLU | 120 | -21.704 | -0.822 | -3.475 | 1.00 | 0.00 | H |
| ATOM | 1835 | N    | VAL | 121 | -18.352 | -0.394 | -0.235 | 1.00 | 0.00 | N |
| ATOM | 1836 | CA   | VAL | 121 | -17.347 | 0.060  | 0.717  | 1.00 | 0.00 | C |
| ATOM | 1837 | C    | VAL | 121 | -16.675 | -1.119 | 1.412  | 1.00 | 0.00 | C |
| ATOM | 1838 | O    | VAL | 121 | -15.458 | -1.139 | 1.589  | 1.00 | 0.00 | O |

|      |      |      |      |     |         |        |        |      |      |   |
|------|------|------|------|-----|---------|--------|--------|------|------|---|
| ATOM | 1839 | CB   | VAL  | 121 | -17.962 | 0.986  | 1.784  | 1.00 | 0.00 | C |
| ATOM | 1840 | CG1  | VAL  | 121 | -16.926 | 1.355  | 2.834  | 1.00 | 0.00 | C |
| ATOM | 1841 | CG2  | VAL  | 121 | -18.544 | 2.231  | 1.133  | 1.00 | 0.00 | C |
| ATOM | 1842 | H    | VAL  | 121 | -19.283 | -0.115 | -0.117 | 1.00 | 0.00 | H |
| ATOM | 1843 | HA   | VAL  | 121 | -16.598 | 0.618  | 0.174  | 1.00 | 0.00 | H |
| ATOM | 1844 | HB   | VAL  | 121 | -18.765 | 0.453  | 2.272  | 1.00 | 0.00 | H |
| ATOM | 1845 | 1HG1 | VAL  | 121 | -16.954 | 2.421  | 3.006  | 1.00 | 0.00 | H |
| ATOM | 1846 | 2HG1 | VAL  | 121 | -17.144 | 0.834  | 3.756  | 1.00 | 0.00 | H |
| ATOM | 1847 | 3HG1 | VAL  | 121 | -15.943 | 1.072  | 2.484  | 1.00 | 0.00 | H |
| ATOM | 1848 | 1HG2 | VAL  | 121 | -17.982 | 2.467  | 0.242  | 1.00 | 0.00 | H |
| ATOM | 1849 | 2HG2 | VAL  | 121 | -19.577 | 2.055  | 0.871  | 1.00 | 0.00 | H |
| ATOM | 1850 | 3HG2 | VAL  | 121 | -18.485 | 3.060  | 1.825  | 1.00 | 0.00 | H |
| ATOM | 1851 | N    | ASP  | 122 | -17.479 | -2.103 | 1.803  | 1.00 | 0.00 | N |
| ATOM | 1852 | CA   | ASP  | 122 | -16.963 | -3.290 | 2.477  | 1.00 | 0.00 | C |
| ATOM | 1853 | C    | ASP  | 122 | -15.775 | -3.871 | 1.719  | 1.00 | 0.00 | C |
| ATOM | 1854 | O    | ASP  | 122 | -14.746 | -4.197 | 2.314  | 1.00 | 0.00 | O |
| ATOM | 1855 | CB   | ASP  | 122 | -18.062 | -4.345 | 2.613  | 1.00 | 0.00 | C |
| ATOM | 1856 | CG   | ASP  | 122 | -18.844 | -4.203 | 3.905  | 1.00 | 0.00 | C |
| ATOM | 1857 | OD1  | ASP  | 122 | -18.262 | -3.722 | 4.899  | 1.00 | 0.00 | O |
| ATOM | 1858 | OD2  | ASP  | 122 | -20.036 | -4.574 | 3.922  | 1.00 | 0.00 | O |
| ATOM | 1859 | H    | ASP  | 122 | -18.441 | -2.031 | 1.634  | 1.00 | 0.00 | H |
| ATOM | 1860 | HA   | ASP  | 122 | -16.636 | -2.994 | 3.463  | 1.00 | 0.00 | H |
| ATOM | 1861 | 2HB3 | ASP  | 122 | -17.615 | -5.326 | 2.590  | 1.00 | 0.00 | H |
| ATOM | 1862 | HB2  | ASP  | 122 | -18.772 | -4.238 | 1.794  | 1.00 | 0.00 | H |
| ATOM | 1863 | N    | GLU  | 123 | -15.923 | -4.002 | 0.405  | 1.00 | 0.00 | N |
| ATOM | 1864 | CA   | GLU  | 123 | -14.862 | -4.546 | -0.434 | 1.00 | 0.00 | C |
| ATOM | 1865 | C    | GLU  | 123 | -13.599 | -3.694 | -0.334 | 1.00 | 0.00 | C |
| ATOM | 1866 | O    | GLU  | 123 | -12.484 | -4.202 | -0.469 | 1.00 | 0.00 | O |
| ATOM | 1867 | CB   | GLU  | 123 | -15.321 | -4.627 | -1.890 | 1.00 | 0.00 | C |
| ATOM | 1868 | CG   | GLU  | 123 | -16.564 | -5.478 | -2.090 | 1.00 | 0.00 | C |
| ATOM | 1869 | CD   | GLU  | 123 | -16.794 | -5.844 | -3.543 | 1.00 | 0.00 | C |
| ATOM | 1870 | OE1  | GLU  | 123 | -15.799 | -6.063 | -4.263 | 1.00 | 0.00 | O |
| ATOM | 1871 | OE2  | GLU  | 123 | -17.970 | -5.910 | -3.961 | 1.00 | 0.00 | O |
| ATOM | 1872 | H    | GLU  | 123 | -16.766 | -3.725 | -0.011 | 1.00 | 0.00 | H |
| ATOM | 1873 | HA   | GLU  | 123 | -14.638 | -5.543 | -0.080 | 1.00 | 0.00 | H |
| ATOM | 1874 | 2HB3 | GLU  | 123 | -14.523 | -5.048 | -2.484 | 1.00 | 0.00 | H |
| ATOM | 1875 | 2HG3 | GLU  | 123 | -17.423 | -4.930 | -1.731 | 1.00 | 0.00 | H |
| ATOM | 1876 | HB2  | GLU  | 123 | -15.573 | -3.629 | -2.249 | 1.00 | 0.00 | H |
| ATOM | 1877 | HG2  | GLU  | 123 | -16.457 | -6.414 | -1.539 | 1.00 | 0.00 | H |
| ATOM | 1878 | N    | MET  | 124 | -13.783 | -2.401 | -0.096 | 1.00 | 0.00 | N |
| ATOM | 1879 | CA   | MET  | 124 | -12.657 | -1.478 | 0.020  | 1.00 | 0.00 | C |
| ATOM | 1880 | C    | MET  | 124 | -11.961 | -1.641 | 1.368  | 1.00 | 0.00 | C |
| ATOM | 1881 | O    | MET  | 124 | -10.737 | -1.759 | 1.434  | 1.00 | 0.00 | O |
| ATOM | 1882 | CB   | MET  | 124 | -13.135 | -0.036 | -0.152 | 1.00 | 0.00 | C |
| ATOM | 1883 | CG   | MET  | 124 | -12.072 | 0.999  | 0.181  | 1.00 | 0.00 | C |
| ATOM | 1884 | SD   | MET  | 124 | -12.315 | 2.554  | -0.700 | 1.00 | 0.00 | S |
| ATOM | 1885 | CE   | MET  | 124 | -11.493 | 2.197  | -2.249 | 1.00 | 0.00 | C |
| ATOM | 1886 | H    | MET  | 124 | -14.695 | -2.056 | 0.000  | 1.00 | 0.00 | H |
| ATOM | 1887 | HA   | MET  | 124 | -11.956 | -1.712 | -0.766 | 1.00 | 0.00 | H |
| ATOM | 1888 | 2HB3 | MET  | 124 | -13.983 | 0.131  | 0.496  | 1.00 | 0.00 | H |
| ATOM | 1889 | 2HG3 | MET  | 124 | -11.104 | 0.598  | -0.084 | 1.00 | 0.00 | H |
| ATOM | 1890 | 1HE  | MET  | 124 | -10.814 | 3.003  | -2.490 | 1.00 | 0.00 | H |
| ATOM | 1891 | 2HE  | MET  | 124 | -10.939 | 1.275  | -2.160 | 1.00 | 0.00 | H |
| ATOM | 1892 | 3HE  | MET  | 124 | -12.230 | 2.101  | -3.034 | 1.00 | 0.00 | H |
| ATOM | 1893 | HB2  | MET  | 124 | -13.417 | 0.134  | -1.191 | 1.00 | 0.00 | H |
| ATOM | 1894 | HG2  | MET  | 124 | -12.109 | 1.229  | 1.247  | 1.00 | 0.00 | H |
| ATOM | 1895 | N    | I LE | 125 | -12.747 | -1.645 | 2.437  | 1.00 | 0.00 | N |
| ATOM | 1896 | CA   | I LE | 125 | -12.205 | -1.791 | 3.783  | 1.00 | 0.00 | C |
| ATOM | 1897 | C    | I LE | 125 | -11.299 | -3.014 | 3.880  | 1.00 | 0.00 | C |
| ATOM | 1898 | O    | I LE | 125 | -10.201 | -2.944 | 4.428  | 1.00 | 0.00 | O |
| ATOM | 1899 | CB   | I LE | 125 | -13.326 | -1.914 | 4.832  | 1.00 | 0.00 | C |
| ATOM | 1900 | CG2  | I LE | 125 | -12.742 | -2.255 | 6.193  | 1.00 | 0.00 | C |
| ATOM | 1901 | CG1  | I LE | 125 | -14.134 | -0.617 | 4.901  | 1.00 | 0.00 | C |
| ATOM | 1902 | CD1  | I LE | 125 | -13.355 | 0.550  | 5.469  | 1.00 | 0.00 | C |
| ATOM | 1903 | H    | I LE | 125 | -13.716 | -1.546 | 2.320  | 1.00 | 0.00 | H |
| ATOM | 1904 | HA   | I LE | 125 | -11.625 | -0.908 | 4.006  | 1.00 | 0.00 | H |
| ATOM | 1905 | HB   | I LE | 125 | -13.980 | -2.721 | 4.535  | 1.00 | 0.00 | H |
| ATOM | 1906 | 1HG2 | I LE | 125 | -12.214 | -1.397 | 6.583  | 1.00 | 0.00 | H |
| ATOM | 1907 | 2HG2 | I LE | 125 | -13.538 | -2.522 | 6.871  | 1.00 | 0.00 | H |
| ATOM | 1908 | 3HG2 | I LE | 125 | -12.059 | -3.086 | 6.095  | 1.00 | 0.00 | H |
| ATOM | 1909 | 2HG3 | I LE | 125 | -15.001 | -0.773 | 5.527  | 1.00 | 0.00 | H |
| ATOM | 1910 | 1HD1 | I LE | 125 | -12.309 | 0.291  | 5.521  | 1.00 | 0.00 | H |
| ATOM | 1911 | 2HD1 | I LE | 125 | -13.484 | 1.412  | 4.832  | 1.00 | 0.00 | H |
| ATOM | 1912 | 3HD1 | I LE | 125 | -13.718 | 0.776  | 6.461  | 1.00 | 0.00 | H |
| ATOM | 1913 | HG2  | I LE | 125 | -14.449 | -0.330 | 3.898  | 1.00 | 0.00 | H |
| ATOM | 1914 | N    | ARG  | 126 | -11.768 | -4.136 | 3.336  | 1.00 | 0.00 | N |
| ATOM | 1915 | CA   | ARG  | 126 | -10.998 | -5.374 | 3.362  | 1.00 | 0.00 | C |

|      |      |      |     |     |         |         |        |      |      |   |
|------|------|------|-----|-----|---------|---------|--------|------|------|---|
| ATOM | 1916 | C    | ARG | 126 | -9.694  | -5.220  | 2.584  | 1.00 | 0.00 | C |
| ATOM | 1917 | O    | ARG | 126 | -8.842  | -6.107  | 2.603  | 1.00 | 0.00 | O |
| ATOM | 1918 | CB   | ARG | 126 | -11.823 | -6.522  | 2.774  | 1.00 | 0.00 | C |
| ATOM | 1919 | CG   | ARG | 126 | -11.947 | -6.469  | 1.261  | 1.00 | 0.00 | C |
| ATOM | 1920 | CD   | ARG | 126 | -12.214 | -7.847  | 0.676  | 1.00 | 0.00 | C |
| ATOM | 1921 | NE   | ARG | 126 | -11.065 | -8.737  | 0.825  | 1.00 | 0.00 | N |
| ATOM | 1922 | CZ   | ARG | 126 | -11.140 | -10.059 | 0.725  | 1.00 | 0.00 | C |
| ATOM | 1923 | NH1  | ARG | 126 | -12.304 | -10.642 | 0.473  | 1.00 | 0.00 | N |
| ATOM | 1924 | NH2  | ARG | 126 | -10.050 | -10.801 | 0.873  | 1.00 | 0.00 | N |
| ATOM | 1925 | H    | ARG | 126 | -12.650 | -4.129  | 2.913  | 1.00 | 0.00 | H |
| ATOM | 1926 | HA   | ARG | 126 | -10.766 | -5.600  | 4.391  | 1.00 | 0.00 | H |
| ATOM | 1927 | 2HB3 | ARG | 126 | -12.814 | -6.489  | 3.196  | 1.00 | 0.00 | H |
| ATOM | 1928 | 2HG3 | ARG | 126 | -11.027 | -6.083  | 0.846  | 1.00 | 0.00 | H |
| ATOM | 1929 | 2HD3 | ARG | 126 | -12.439 | -7.740  | -0.375 | 1.00 | 0.00 | H |
| ATOM | 1930 | HE   | ARG | 126 | -10.193 | -8.326  | 1.010  | 1.00 | 0.00 | H |
| ATOM | 1931 | 1HH1 | ARG | 126 | -13.127 | -10.086 | 0.360  | 1.00 | 0.00 | H |
| ATOM | 1932 | 2HH1 | ARG | 126 | -12.360 | -11.639 | 0.397  | 1.00 | 0.00 | H |
| ATOM | 1933 | 1HH2 | ARG | 126 | -9.171  | -10.365 | 1.062  | 1.00 | 0.00 | H |
| ATOM | 1934 | 2HH2 | ARG | 126 | -10.109 | -11.797 | 0.796  | 1.00 | 0.00 | H |
| ATOM | 1935 | HB2  | ARG | 126 | -11.341 | -7.471  | 3.006  | 1.00 | 0.00 | H |
| ATOM | 1936 | HG2  | ARG | 126 | -12.780 | -5.821  | 0.986  | 1.00 | 0.00 | H |
| ATOM | 1937 | HD2  | ARG | 126 | -13.052 | -8.309  | 1.197  | 1.00 | 0.00 | H |
| ATOM | 1938 | N    | GLU | 127 | -9.548  | -4.089  | 1.902  | 1.00 | 0.00 | N |
| ATOM | 1939 | CA   | GLU | 127 | -8.351  | -3.820  | 1.116  | 1.00 | 0.00 | C |
| ATOM | 1940 | C    | GLU | 127 | -7.268  | -3.178  | 1.981  | 1.00 | 0.00 | C |
| ATOM | 1941 | O    | GLU | 127 | -6.140  | -3.667  | 2.043  | 1.00 | 0.00 | O |
| ATOM | 1942 | CB   | GLU | 127 | -8.680  | -2.909  | -0.067 | 1.00 | 0.00 | C |
| ATOM | 1943 | CG   | GLU | 127 | -7.684  | -3.010  | -1.210 | 1.00 | 0.00 | C |
| ATOM | 1944 | CD   | GLU | 127 | -7.642  | -1.754  | -2.058 | 1.00 | 0.00 | C |
| ATOM | 1945 | OE1  | GLU | 127 | -8.683  | -1.405  | -2.654 | 1.00 | 0.00 | O |
| ATOM | 1946 | OE2  | GLU | 127 | -6.570  | -1.119  | -2.128 | 1.00 | 0.00 | O |
| ATOM | 1947 | H    | GLU | 127 | -10.264 | -3.420  | 1.926  | 1.00 | 0.00 | H |
| ATOM | 1948 | HA   | GLU | 127 | -7.981  | -4.763  | 0.742  | 1.00 | 0.00 | H |
| ATOM | 1949 | 2HB3 | GLU | 127 | -8.700  | -1.886  | 0.275  | 1.00 | 0.00 | H |
| ATOM | 1950 | 2HG3 | GLU | 127 | -7.961  | -3.842  | -1.841 | 1.00 | 0.00 | H |
| ATOM | 1951 | HB2  | GLU | 127 | -9.650  | -3.189  | -0.482 | 1.00 | 0.00 | H |
| ATOM | 1952 | HG2  | GLU | 127 | -6.684  | -3.159  | -0.808 | 1.00 | 0.00 | H |
| ATOM | 1953 | N    | ALA | 128 | -7.619  | -2.079  | 2.638  | 1.00 | 0.00 | N |
| ATOM | 1954 | CA   | ALA | 128 | -6.681  | -1.370  | 3.500  | 1.00 | 0.00 | C |
| ATOM | 1955 | C    | ALA | 128 | -6.681  | -1.951  | 4.909  | 1.00 | 0.00 | C |
| ATOM | 1956 | O    | ALA | 128 | -5.629  | -2.094  | 5.532  | 1.00 | 0.00 | O |
| ATOM | 1957 | CB   | ALA | 128 | -7.017  | 0.112   | 3.536  | 1.00 | 0.00 | C |
| ATOM | 1958 | H    | ALA | 128 | -8.534  | -1.739  | 2.548  | 1.00 | 0.00 | H |
| ATOM | 1959 | HA   | ALA | 128 | -5.693  | -1.481  | 3.077  | 1.00 | 0.00 | H |
| ATOM | 1960 | 1HB  | ALA | 128 | -7.763  | 0.333   | 2.786  | 1.00 | 0.00 | H |
| ATOM | 1961 | 2HB  | ALA | 128 | -7.402  | 0.369   | 4.513  | 1.00 | 0.00 | H |
| ATOM | 1962 | 3HB  | ALA | 128 | -6.124  | 0.689   | 3.340  | 1.00 | 0.00 | H |
| ATOM | 1963 | N    | ASP | 129 | -7.867  | -2.284  | 5.408  | 1.00 | 0.00 | N |
| ATOM | 1964 | CA   | ASP | 129 | -8.002  | -2.852  | 6.743  | 1.00 | 0.00 | C |
| ATOM | 1965 | C    | ASP | 129 | -7.144  | -4.103  | 6.895  | 1.00 | 0.00 | C |
| ATOM | 1966 | O    | ASP | 129 | -7.445  | -5.147  | 6.313  | 1.00 | 0.00 | O |
| ATOM | 1967 | CB   | ASP | 129 | -9.469  | -3.184  | 7.031  | 1.00 | 0.00 | C |
| ATOM | 1968 | CG   | ASP | 129 | -9.774  | -3.204  | 8.517  | 1.00 | 0.00 | C |
| ATOM | 1969 | OD1  | ASP | 129 | -8.821  | -3.305  | 9.317  | 1.00 | 0.00 | O |
| ATOM | 1970 | OD2  | ASP | 129 | -10.968 | -3.125  | 8.877  | 1.00 | 0.00 | O |
| ATOM | 1971 | H    | ASP | 129 | -8.668  | -2.148  | 4.862  | 1.00 | 0.00 | H |
| ATOM | 1972 | HA   | ASP | 129 | -7.664  | -2.111  | 7.454  | 1.00 | 0.00 | H |
| ATOM | 1973 | 2HB3 | ASP | 129 | -9.698  | -4.157  | 6.622  | 1.00 | 0.00 | H |
| ATOM | 1974 | HB2  | ASP | 129 | -10.110 | -2.427  | 6.579  | 1.00 | 0.00 | H |
| ATOM | 1975 | N    | ILE | 130 | -6.076  | -3.992  | 7.676  | 1.00 | 0.00 | N |
| ATOM | 1976 | CA   | ILE | 130 | -5.175  | -5.115  | 7.902  | 1.00 | 0.00 | C |
| ATOM | 1977 | C    | ILE | 130 | -5.687  | -6.014  | 9.021  | 1.00 | 0.00 | C |
| ATOM | 1978 | O    | ILE | 130 | -5.989  | -7.188  | 8.799  | 1.00 | 0.00 | O |
| ATOM | 1979 | CB   | ILE | 130 | -3.755  | -4.635  | 8.256  | 1.00 | 0.00 | C |
| ATOM | 1980 | CG2  | ILE | 130 | -2.782  | -5.804  | 8.240  | 1.00 | 0.00 | C |
| ATOM | 1981 | CG1  | ILE | 130 | -3.304  | -3.546  | 7.280  | 1.00 | 0.00 | C |
| ATOM | 1982 | CD1  | ILE | 130 | -3.066  | -4.053  | 5.874  | 1.00 | 0.00 | C |
| ATOM | 1983 | H    | ILE | 130 | -5.891  | -3.134  | 8.112  | 1.00 | 0.00 | H |
| ATOM | 1984 | HA   | ILE | 130 | -5.122  | -5.689  | 6.989  | 1.00 | 0.00 | H |
| ATOM | 1985 | HB   | ILE | 130 | -3.775  | -4.225  | 9.255  | 1.00 | 0.00 | H |
| ATOM | 1986 | 1HG2 | ILE | 130 | -1.777  | -5.437  | 8.399  | 1.00 | 0.00 | H |
| ATOM | 1987 | 2HG2 | ILE | 130 | -3.039  | -6.496  | 9.027  | 1.00 | 0.00 | H |
| ATOM | 1988 | 3HG2 | ILE | 130 | -2.836  | -6.304  | 7.286  | 1.00 | 0.00 | H |
| ATOM | 1989 | 2HG3 | ILE | 130 | -2.381  | -3.112  | 7.638  | 1.00 | 0.00 | H |
| ATOM | 1990 | 1HD1 | ILE | 130 | -2.031  | -4.338  | 5.765  | 1.00 | 0.00 | H |
| ATOM | 1991 | 2HD1 | ILE | 130 | -3.698  | -4.908  | 5.688  | 1.00 | 0.00 | H |
| ATOM | 1992 | 3HD1 | ILE | 130 | -3.301  | -3.272  | 5.166  | 1.00 | 0.00 | H |

|      |      |      |      |     |         |        |        |      |      |   |
|------|------|------|------|-----|---------|--------|--------|------|------|---|
| ATOM | 1993 | HG2  | I LE | 130 | -4.075  | -2.777 | 7.212  | 1.00 | 0.00 | H |
| ATOM | 1994 | N    | ASP  | 131 | -5.786  | -5.459 | 10.223 | 1.00 | 0.00 | N |
| ATOM | 1995 | CA   | ASP  | 131 | -6.267  | -6.208 | 11.378 | 1.00 | 0.00 | C |
| ATOM | 1996 | C    | ASP  | 131 | -7.637  | -6.817 | 11.098 | 1.00 | 0.00 | C |
| ATOM | 1997 | O    | ASP  | 131 | -7.879  | -7.988 | 11.388 | 1.00 | 0.00 | O |
| ATOM | 1998 | CB   | ASP  | 131 | -6.339  | -5.302 | 12.608 | 1.00 | 0.00 | C |
| ATOM | 1999 | CG   | ASP  | 131 | -7.400  | -4.230 | 12.476 | 1.00 | 0.00 | C |
| ATOM | 2000 | OD1  | ASP  | 131 | -7.411  | -3.530 | 11.443 | 1.00 | 0.00 | O |
| ATOM | 2001 | OD2  | ASP  | 131 | -8.220  | -4.089 | 13.409 | 1.00 | 0.00 | O |
| ATOM | 2002 | H    | ASP  | 131 | -5.531  | -4.517 | 10.336 | 1.00 | 0.00 | H |
| ATOM | 2003 | HA   | ASP  | 131 | -5.564  | -7.006 | 11.568 | 1.00 | 0.00 | H |
| ATOM | 2004 | 2HB3 | ASP  | 131 | -5.380  | -4.822 | 12.748 | 1.00 | 0.00 | H |
| ATOM | 2005 | HB2  | ASP  | 131 | -6.587  | -5.901 | 13.484 | 1.00 | 0.00 | H |
| ATOM | 2006 | N    | GLY  | 132 | -8.532  | -6.013 | 10.532 | 1.00 | 0.00 | N |
| ATOM | 2007 | CA   | GLY  | 132 | -9.868  | -6.488 | 10.224 | 1.00 | 0.00 | C |
| ATOM | 2008 | C    | GLY  | 132 | -10.895 | -6.033 | 11.243 | 1.00 | 0.00 | C |
| ATOM | 2009 | O    | GLY  | 132 | -11.735 | -6.821 | 11.681 | 1.00 | 0.00 | O |
| ATOM | 2010 | H    | GLY  | 132 | -8.284  | -5.088 | 10.322 | 1.00 | 0.00 | H |
| ATOM | 2011 | 2HA  | GLY  | 132 | -10.154 | -6.120 | 9.252  | 1.00 | 0.00 | H |
| ATOM | 2012 | 3HA  | GLY  | 132 | -9.856  | -7.568 | 10.201 | 1.00 | 0.00 | H |
| ATOM | 2013 | N    | ASP  | 133 | -10.828 | -4.762 | 11.623 | 1.00 | 0.00 | N |
| ATOM | 2014 | CA   | ASP  | 133 | -11.756 | -4.204 | 12.596 | 1.00 | 0.00 | C |
| ATOM | 2015 | C    | ASP  | 133 | -12.770 | -3.289 | 11.916 | 1.00 | 0.00 | C |
| ATOM | 2016 | O    | ASP  | 133 | -13.452 | -2.503 | 12.573 | 1.00 | 0.00 | O |
| ATOM | 2017 | CB   | ASP  | 133 | -10.997 | -3.433 | 13.675 | 1.00 | 0.00 | C |
| ATOM | 2018 | CG   | ASP  | 133 | -10.154 | -2.313 | 13.102 | 1.00 | 0.00 | C |
| ATOM | 2019 | OD1  | ASP  | 133 | -10.314 | -2.004 | 11.902 | 1.00 | 0.00 | O |
| ATOM | 2020 | OD2  | ASP  | 133 | -9.332  | -1.745 | 13.851 | 1.00 | 0.00 | O |
| ATOM | 2021 | H    | ASP  | 133 | -10.134 | -4.186 | 11.235 | 1.00 | 0.00 | H |
| ATOM | 2022 | HA   | ASP  | 133 | -12.286 | -5.024 | 13.057 | 1.00 | 0.00 | H |
| ATOM | 2023 | 2HB3 | ASP  | 133 | -10.348 | -4.115 | 14.206 | 1.00 | 0.00 | H |
| ATOM | 2024 | HB2  | ASP  | 133 | -11.708 | -2.982 | 14.368 | 1.00 | 0.00 | H |
| ATOM | 2025 | N    | GLY  | 134 | -12.863 | -3.393 | 10.594 | 1.00 | 0.00 | N |
| ATOM | 2026 | CA   | GLY  | 134 | -13.792 | -2.566 | 9.847  | 1.00 | 0.00 | C |
| ATOM | 2027 | C    | GLY  | 134 | -13.413 | -1.099 | 9.871  | 1.00 | 0.00 | C |
| ATOM | 2028 | O    | GLY  | 134 | -14.280 | -0.226 | 9.852  | 1.00 | 0.00 | O |
| ATOM | 2029 | H    | GLY  | 134 | -12.294 | -4.036 | 10.121 | 1.00 | 0.00 | H |
| ATOM | 2030 | 2HA  | GLY  | 134 | -13.816 | -2.905 | 8.823  | 1.00 | 0.00 | H |
| ATOM | 2031 | 3HA  | GLY  | 134 | -14.778 | -2.678 | 10.274 | 1.00 | 0.00 | H |
| ATOM | 2032 | N    | GLN  | 135 | -12.112 | -0.827 | 9.911  | 1.00 | 0.00 | N |
| ATOM | 2033 | CA   | GLN  | 135 | -11.621 | 0.548  | 9.938  | 1.00 | 0.00 | C |
| ATOM | 2034 | C    | GLN  | 135 | -10.379 | 0.697  | 9.066  | 1.00 | 0.00 | C |
| ATOM | 2035 | O    | GLN  | 135 | -9.741  | -0.288 | 8.700  | 1.00 | 0.00 | O |
| ATOM | 2036 | CB   | GLN  | 135 | -11.303 | 0.967  | 11.375 | 1.00 | 0.00 | C |
| ATOM | 2037 | CG   | GLN  | 135 | -12.395 | 0.610  | 12.370 | 1.00 | 0.00 | C |
| ATOM | 2038 | CD   | GLN  | 135 | -12.474 | 1.582  | 13.527 | 1.00 | 0.00 | C |
| ATOM | 2039 | OE1  | GLN  | 135 | -13.058 | 2.659  | 13.410 | 1.00 | 0.00 | O |
| ATOM | 2040 | NE2  | GLN  | 135 | -11.881 | 1.210  | 14.656 | 1.00 | 0.00 | N |
| ATOM | 2041 | H    | GLN  | 135 | -11.470 | -1.564 | 9.921  | 1.00 | 0.00 | H |
| ATOM | 2042 | HA   | GLN  | 135 | -12.399 | 1.185  | 9.550  | 1.00 | 0.00 | H |
| ATOM | 2043 | 2HB3 | GLN  | 135 | -11.162 | 2.037  | 11.400 | 1.00 | 0.00 | H |
| ATOM | 2044 | 2HG3 | GLN  | 135 | -12.198 | -0.379 | 12.760 | 1.00 | 0.00 | H |
| ATOM | 2045 | 1HE2 | GLN  | 135 | -11.434 | 0.337  | 14.678 | 1.00 | 0.00 | H |
| ATOM | 2046 | 2HE2 | GLN  | 135 | -11.917 | 1.819  | 15.422 | 1.00 | 0.00 | H |
| ATOM | 2047 | HB2  | GLN  | 135 | -10.401 | 0.460  | 11.712 | 1.00 | 0.00 | H |
| ATOM | 2048 | HG2  | GLN  | 135 | -13.365 | 0.628  | 11.869 | 1.00 | 0.00 | H |
| ATOM | 2049 | N    | VAL  | 136 | -10.043 | 1.939  | 8.734  | 1.00 | 0.00 | N |
| ATOM | 2050 | CA   | VAL  | 136 | -8.877  | 2.221  | 7.906  | 1.00 | 0.00 | C |
| ATOM | 2051 | C    | VAL  | 136 | -8.062  | 3.375  | 8.476  | 1.00 | 0.00 | C |
| ATOM | 2052 | O    | VAL  | 136 | -8.178  | 4.514  | 8.023  | 1.00 | 0.00 | O |
| ATOM | 2053 | CB   | VAL  | 136 | -9.286  | 2.562  | 6.459  | 1.00 | 0.00 | C |
| ATOM | 2054 | CG1  | VAL  | 136 | -8.061  | 2.896  | 5.623  | 1.00 | 0.00 | C |
| ATOM | 2055 | CG2  | VAL  | 136 | -10.066 | 1.409  | 5.841  | 1.00 | 0.00 | C |
| ATOM | 2056 | H    | VAL  | 136 | -10.591 | 2.685  | 9.057  | 1.00 | 0.00 | H |
| ATOM | 2057 | HA   | VAL  | 136 | -8.262  | 1.334  | 7.883  | 1.00 | 0.00 | H |
| ATOM | 2058 | HB   | VAL  | 136 | -9.927  | 3.430  | 6.483  | 1.00 | 0.00 | H |
| ATOM | 2059 | 1HG1 | VAL  | 136 | -7.897  | 3.964  | 5.636  | 1.00 | 0.00 | H |
| ATOM | 2060 | 2HG1 | VAL  | 136 | -7.197  | 2.393  | 6.031  | 1.00 | 0.00 | H |
| ATOM | 2061 | 3HG1 | VAL  | 136 | -8.221  | 2.571  | 4.606  | 1.00 | 0.00 | H |
| ATOM | 2062 | 1HG2 | VAL  | 136 | -9.392  | 0.783  | 5.275  | 1.00 | 0.00 | H |
| ATOM | 2063 | 2HG2 | VAL  | 136 | -10.527 | 0.824  | 6.624  | 1.00 | 0.00 | H |
| ATOM | 2064 | 3HG2 | VAL  | 136 | -10.829 | 1.802  | 5.187  | 1.00 | 0.00 | H |
| ATOM | 2065 | N    | ASN  | 137 | -7.236  | 3.075  | 9.472  | 1.00 | 0.00 | N |
| ATOM | 2066 | CA   | ASN  | 137 | -6.400  | 4.088  | 10.107 | 1.00 | 0.00 | C |
| ATOM | 2067 | C    | ASN  | 137 | -5.349  | 4.611  | 9.133  | 1.00 | 0.00 | C |
| ATOM | 2068 | O    | ASN  | 137 | -5.272  | 4.167  | 7.988  | 1.00 | 0.00 | O |
| ATOM | 2069 | CB   | ASN  | 137 | -5.720  | 3.512  | 11.350 | 1.00 | 0.00 | C |

|      |      |      |     |     |        |        |        |      |      |   |
|------|------|------|-----|-----|--------|--------|--------|------|------|---|
| ATOM | 2070 | CG   | ASN | 137 | -5.093 | 2.158  | 11.089 | 1.00 | 0.00 | C |
| ATOM | 2071 | OD1  | ASN | 137 | -5.758 | 1.124  | 11.176 | 1.00 | 0.00 | O |
| ATOM | 2072 | ND2  | ASN | 137 | -3.803 | 2.154  | 10.771 | 1.00 | 0.00 | N |
| ATOM | 2073 | H    | ASN | 137 | -7.188 | 2.148  | 9.790  | 1.00 | 0.00 | H |
| ATOM | 2074 | HA   | ASN | 137 | -7.042 | 4.905  | 10.402 | 1.00 | 0.00 | H |
| ATOM | 2075 | 2HB3 | ASN | 137 | -6.452 | 3.407  | 12.137 | 1.00 | 0.00 | H |
| ATOM | 2076 | 1HD2 | ASN | 137 | -3.337 | 3.014  | 10.721 | 1.00 | 0.00 | H |
| ATOM | 2077 | 2HD2 | ASN | 137 | -3.372 | 1.290  | 10.599 | 1.00 | 0.00 | H |
| ATOM | 2078 | HB2  | ASN | 137 | -4.924 | 4.181  | 11.671 | 1.00 | 0.00 | H |
| ATOM | 2079 | N    | TYR | 138 | -4.540 | 5.558  | 9.598  | 1.00 | 0.00 | N |
| ATOM | 2080 | CA   | TYR | 138 | -3.494 | 6.144  | 8.769  | 1.00 | 0.00 | C |
| ATOM | 2081 | C    | TYR | 138 | -2.619 | 5.057  | 8.149  | 1.00 | 0.00 | C |
| ATOM | 2082 | O    | TYR | 138 | -2.490 | 4.974  | 6.927  | 1.00 | 0.00 | O |
| ATOM | 2083 | CB   | TYR | 138 | -2.632 | 7.097  | 9.597  | 1.00 | 0.00 | C |
| ATOM | 2084 | CG   | TYR | 138 | -1.545 | 7.779  | 8.798  | 1.00 | 0.00 | C |
| ATOM | 2085 | CD1  | TYR | 138 | -1.857 | 8.598  | 7.719  | 1.00 | 0.00 | C |
| ATOM | 2086 | CE1  | TYR | 138 | -0.866 | 9.223  | 6.987  | 1.00 | 0.00 | C |
| ATOM | 2087 | CZ   | TYR | 138 | 0.455  | 9.035  | 7.327  | 1.00 | 0.00 | C |
| ATOM | 2088 | CE2  | TYR | 138 | 0.792  | 8.226  | 8.393  | 1.00 | 0.00 | C |
| ATOM | 2089 | CD2  | TYR | 138 | -0.205 | 7.604  | 9.121  | 1.00 | 0.00 | C |
| ATOM | 2090 | OH   | TYR | 138 | 1.447  | 9.654  | 6.600  | 1.00 | 0.00 | O |
| ATOM | 2091 | H    | TYR | 138 | -4.652 | 5.871  | 10.519 | 1.00 | 0.00 | H |
| ATOM | 2092 | HA   | TYR | 138 | -3.972 | 6.703  | 7.976  | 1.00 | 0.00 | H |
| ATOM | 2093 | 2HB3 | TYR | 138 | -2.160 | 6.542  | 10.395 | 1.00 | 0.00 | H |
| ATOM | 2094 | 1HD  | TYR | 138 | -2.895 | 8.745  | 7.456  | 1.00 | 0.00 | H |
| ATOM | 2095 | 1HE  | TYR | 138 | -1.129 | 9.856  | 6.153  | 1.00 | 0.00 | H |
| ATOM | 2096 | 2HE  | TYR | 138 | 1.828  | 8.078  | 8.660  | 1.00 | 0.00 | H |
| ATOM | 2097 | 2HD  | TYR | 138 | 0.056  | 6.970  | 9.956  | 1.00 | 0.00 | H |
| ATOM | 2098 | HH   | TYR | 138 | 1.821  | 9.031  | 5.973  | 1.00 | 0.00 | H |
| ATOM | 2099 | HB2  | TYR | 138 | -3.258 | 7.888  | 10.011 | 1.00 | 0.00 | H |
| ATOM | 2100 | N    | GLU | 139 | -2.021 | 4.230  | 8.999  | 1.00 | 0.00 | N |
| ATOM | 2101 | CA   | GLU | 139 | -1.159 | 3.150  | 8.534  | 1.00 | 0.00 | C |
| ATOM | 2102 | C    | GLU | 139 | -1.870 | 2.301  | 7.482  | 1.00 | 0.00 | C |
| ATOM | 2103 | O    | GLU | 139 | -1.322 | 2.036  | 6.413  | 1.00 | 0.00 | O |
| ATOM | 2104 | CB   | GLU | 139 | -0.729 | 2.270  | 9.710  | 1.00 | 0.00 | C |
| ATOM | 2105 | CG   | GLU | 139 | 0.166  | 1.110  | 9.306  | 1.00 | 0.00 | C |
| ATOM | 2106 | CD   | GLU | 139 | 0.004  | -0.094 | 10.214 | 1.00 | 0.00 | C |
| ATOM | 2107 | OE1  | GLU | 139 | -1.097 | -0.274 | 10.773 | 1.00 | 0.00 | O |
| ATOM | 2108 | OE2  | GLU | 139 | 0.981  | -0.857 | 10.364 | 1.00 | 0.00 | O |
| ATOM | 2109 | H    | GLU | 139 | -2.165 | 4.348  | 9.961  | 1.00 | 0.00 | H |
| ATOM | 2110 | HA   | GLU | 139 | -0.283 | 3.594  | 8.091  | 1.00 | 0.00 | H |
| ATOM | 2111 | 2HB3 | GLU | 139 | -1.612 | 1.867  | 10.185 | 1.00 | 0.00 | H |
| ATOM | 2112 | 2HG3 | GLU | 139 | 1.194  | 1.436  | 9.345  | 1.00 | 0.00 | H |
| ATOM | 2113 | HB2  | GLU | 139 | -0.159 | 2.867  | 10.422 | 1.00 | 0.00 | H |
| ATOM | 2114 | HG2  | GLU | 139 | -0.090 | 0.789  | 8.297  | 1.00 | 0.00 | H |
| ATOM | 2115 | N    | GLU | 140 | -3.090 | 1.878  | 7.797  | 1.00 | 0.00 | N |
| ATOM | 2116 | CA   | GLU | 140 | -3.873 | 1.059  | 6.880  | 1.00 | 0.00 | C |
| ATOM | 2117 | C    | GLU | 140 | -4.147 | 1.809  | 5.579  | 1.00 | 0.00 | C |
| ATOM | 2118 | O    | GLU | 140 | -4.154 | 1.219  | 4.498  | 1.00 | 0.00 | O |
| ATOM | 2119 | CB   | GLU | 140 | -5.193 | 0.645  | 7.531  | 1.00 | 0.00 | C |
| ATOM | 2120 | CG   | GLU | 140 | -5.023 | -0.297 | 8.711  | 1.00 | 0.00 | C |
| ATOM | 2121 | CD   | GLU | 140 | -6.340 | -0.641 | 9.381  | 1.00 | 0.00 | C |
| ATOM | 2122 | OE1  | GLU | 140 | -7.206 | 0.252  | 9.479  | 1.00 | 0.00 | O |
| ATOM | 2123 | OE2  | GLU | 140 | -6.502 | -1.805 | 9.802  | 1.00 | 0.00 | O |
| ATOM | 2124 | H    | GLU | 140 | -3.472 | 2.122  | 8.666  | 1.00 | 0.00 | H |
| ATOM | 2125 | HA   | GLU | 140 | -3.299 | 0.172  | 6.655  | 1.00 | 0.00 | H |
| ATOM | 2126 | 2HB3 | GLU | 140 | -5.806 | 0.152  | 6.791  | 1.00 | 0.00 | H |
| ATOM | 2127 | 2HG3 | GLU | 140 | -4.379 | 0.174  | 9.439  | 1.00 | 0.00 | H |
| ATOM | 2128 | HB2  | GLU | 140 | -5.702 | 1.529  | 7.916  | 1.00 | 0.00 | H |
| ATOM | 2129 | HG2  | GLU | 140 | -4.581 | -1.233 | 8.369  | 1.00 | 0.00 | H |
| ATOM | 2130 | N    | PHE | 141 | -4.373 | 3.113  | 5.691  | 1.00 | 0.00 | N |
| ATOM | 2131 | CA   | PHE | 141 | -4.649 | 3.943  | 4.524  | 1.00 | 0.00 | C |
| ATOM | 2132 | C    | PHE | 141 | -3.414 | 4.069  | 3.641  | 1.00 | 0.00 | C |
| ATOM | 2133 | O    | PHE | 141 | -3.490 | 3.909  | 2.423  | 1.00 | 0.00 | O |
| ATOM | 2134 | CB   | PHE | 141 | -5.119 | 5.332  | 4.963  | 1.00 | 0.00 | C |
| ATOM | 2135 | CG   | PHE | 141 | -5.008 | 6.371  | 3.883  | 1.00 | 0.00 | C |
| ATOM | 2136 | CD1  | PHE | 141 | -5.648 | 6.195  | 2.666  | 1.00 | 0.00 | C |
| ATOM | 2137 | CE1  | PHE | 141 | -5.545 | 7.149  | 1.672  | 1.00 | 0.00 | C |
| ATOM | 2138 | CZ   | PHE | 141 | -4.803 | 8.293  | 1.886  | 1.00 | 0.00 | C |
| ATOM | 2139 | CE2  | PHE | 141 | -4.159 | 8.480  | 3.094  | 1.00 | 0.00 | C |
| ATOM | 2140 | CD2  | PHE | 141 | -4.265 | 7.523  | 4.086  | 1.00 | 0.00 | C |
| ATOM | 2141 | H    | PHE | 141 | -4.354 | 3.527  | 6.580  | 1.00 | 0.00 | H |
| ATOM | 2142 | HA   | PHE | 141 | -5.435 | 3.469  | 3.961  | 1.00 | 0.00 | H |
| ATOM | 2143 | 2HB3 | PHE | 141 | -4.524 | 5.659  | 5.802  | 1.00 | 0.00 | H |
| ATOM | 2144 | 1HD  | PHE | 141 | -6.232 | 5.303  | 2.498  | 1.00 | 0.00 | H |
| ATOM | 2145 | 1HE  | PHE | 141 | -6.050 | 7.001  | 0.729  | 1.00 | 0.00 | H |
| ATOM | 2146 | HZ   | PHE | 141 | -4.721 | 9.038  | 1.110  | 1.00 | 0.00 | H |

|      |      |      |     |     |        |        |        |      |      |   |
|------|------|------|-----|-----|--------|--------|--------|------|------|---|
| ATOM | 2147 | 2HE  | PHE | 141 | -3.576 | 9.374  | 3.265  | 1.00 | 0.00 | H |
| ATOM | 2148 | 2HD  | PHE | 141 | -3.761 | 7.669  | 5.032  | 1.00 | 0.00 | H |
| ATOM | 2149 | HB2  | PHE | 141 | -6.171 | 5.289  | 5.247  | 1.00 | 0.00 | H |
| ATOM | 2150 | N    | VAL | 142 | -2.274 | 4.353  | 4.263  | 1.00 | 0.00 | N |
| ATOM | 2151 | CA   | VAL | 142 | -1.020 | 4.500  | 3.533  | 1.00 | 0.00 | C |
| ATOM | 2152 | C    | VAL | 142 | -0.742 | 3.276  | 2.668  | 1.00 | 0.00 | C |
| ATOM | 2153 | O    | VAL | 142 | -0.453 | 3.398  | 1.478  | 1.00 | 0.00 | O |
| ATOM | 2154 | CB   | VAL | 142 | 0.166  | 4.718  | 4.493  | 1.00 | 0.00 | C |
| ATOM | 2155 | CG1  | VAL | 142 | 1.482  | 4.687  | 3.729  | 1.00 | 0.00 | C |
| ATOM | 2156 | CG2  | VAL | 142 | 0.008  | 6.030  | 5.247  | 1.00 | 0.00 | C |
| ATOM | 2157 | H    | VAL | 142 | -2.276 | 4.469  | 5.236  | 1.00 | 0.00 | H |
| ATOM | 2158 | HA   | VAL | 142 | -1.103 | 5.368  | 2.896  | 1.00 | 0.00 | H |
| ATOM | 2159 | HB   | VAL | 142 | 0.173  | 3.911  | 5.210  | 1.00 | 0.00 | H |
| ATOM | 2160 | 1HG1 | VAL | 142 | 1.604  | 3.721  | 3.265  | 1.00 | 0.00 | H |
| ATOM | 2161 | 2HG1 | VAL | 142 | 1.477  | 5.457  | 2.973  | 1.00 | 0.00 | H |
| ATOM | 2162 | 3HG1 | VAL | 142 | 2.298  | 4.861  | 4.415  | 1.00 | 0.00 | H |
| ATOM | 2163 | 1HG2 | VAL | 142 | 0.484  | 6.823  | 4.692  | 1.00 | 0.00 | H |
| ATOM | 2164 | 2HG2 | VAL | 142 | -1.043 | 6.253  | 5.363  | 1.00 | 0.00 | H |
| ATOM | 2165 | 3HG2 | VAL | 142 | 0.466  | 5.943  | 6.221  | 1.00 | 0.00 | H |
| ATOM | 2166 | N    | GLN | 143 | -0.833 | 2.098  | 3.274  | 1.00 | 0.00 | N |
| ATOM | 2167 | CA   | GLN | 143 | -0.592 | 0.850  | 2.558  | 1.00 | 0.00 | C |
| ATOM | 2168 | C    | GLN | 143 | -1.449 | 0.768  | 1.301  | 1.00 | 0.00 | C |
| ATOM | 2169 | O    | GLN | 143 | -0.945 | 0.508  | 0.209  | 1.00 | 0.00 | O |
| ATOM | 2170 | CB   | GLN | 143 | -0.881 | -0.348 | 3.466  | 1.00 | 0.00 | C |
| ATOM | 2171 | CG   | GLN | 143 | 0.016  | -0.412 | 4.691  | 1.00 | 0.00 | C |
| ATOM | 2172 | CD   | GLN | 143 | 1.482  | -0.567 | 4.335  | 1.00 | 0.00 | C |
| ATOM | 2173 | OE1  | GLN | 143 | 2.103  | 0.355  | 3.805  | 1.00 | 0.00 | O |
| ATOM | 2174 | NE2  | GLN | 143 | 2.043  | -1.733 | 4.625  | 1.00 | 0.00 | N |
| ATOM | 2175 | H    | GLN | 143 | -1.067 | 2.065  | 4.226  | 1.00 | 0.00 | H |
| ATOM | 2176 | HA   | GLN | 143 | 0.449  | 0.830  | 2.272  | 1.00 | 0.00 | H |
| ATOM | 2177 | 2HB3 | GLN | 143 | -0.743 | -1.256 | 2.898  | 1.00 | 0.00 | H |
| ATOM | 2178 | 2HG3 | GLN | 143 | -0.282 | -1.257 | 5.295  | 1.00 | 0.00 | H |
| ATOM | 2179 | 1HE2 | GLN | 143 | 1.486  | -2.423 | 5.046  | 1.00 | 0.00 | H |
| ATOM | 2180 | 2HE2 | GLN | 143 | 2.990  | -1.860 | 4.404  | 1.00 | 0.00 | H |
| ATOM | 2181 | HB2  | GLN | 143 | -1.904 | -0.285 | 3.836  | 1.00 | 0.00 | H |
| ATOM | 2182 | HG2  | GLN | 143 | -0.080 | 0.511  | 5.261  | 1.00 | 0.00 | H |
| ATOM | 2183 | N    | MET | 144 | -2.751 | 0.994  | 1.461  | 1.00 | 0.00 | N |
| ATOM | 2184 | CA   | MET | 144 | -3.678 | 0.947  | 0.337  | 1.00 | 0.00 | C |
| ATOM | 2185 | C    | MET | 144 | -3.170 | 1.796  | -0.824 | 1.00 | 0.00 | C |
| ATOM | 2186 | O    | MET | 144 | -3.087 | 1.328  | -1.958 | 1.00 | 0.00 | O |
| ATOM | 2187 | CB   | MET | 144 | -5.063 | 1.432  | 0.771  | 1.00 | 0.00 | C |
| ATOM | 2188 | CG   | MET | 144 | -6.022 | 1.647  | -0.388 | 1.00 | 0.00 | C |
| ATOM | 2189 | SD   | MET | 144 | -7.675 | 2.119  | 0.157  | 1.00 | 0.00 | S |
| ATOM | 2190 | CE   | MET | 144 | -8.516 | 2.284  | -1.415 | 1.00 | 0.00 | C |
| ATOM | 2191 | H    | MET | 144 | -3.092 | 1.196  | 2.357  | 1.00 | 0.00 | H |
| ATOM | 2192 | HA   | MET | 144 | -3.752 | -0.078 | 0.014  | 1.00 | 0.00 | H |
| ATOM | 2193 | 2HB3 | MET | 144 | -4.954 | 2.369  | 1.299  | 1.00 | 0.00 | H |
| ATOM | 2194 | 2HG3 | MET | 144 | -6.093 | 0.730  | -0.952 | 1.00 | 0.00 | H |
| ATOM | 2195 | 1HE  | MET | 144 | -8.945 | 3.273  | -1.492 | 1.00 | 0.00 | H |
| ATOM | 2196 | 2HE  | MET | 144 | -7.809 | 2.134  | -2.217 | 1.00 | 0.00 | H |
| ATOM | 2197 | 3HE  | MET | 144 | -9.301 | 1.547  | -1.482 | 1.00 | 0.00 | H |
| ATOM | 2198 | HB2  | MET | 144 | -5.524 | 0.685  | 1.416  | 1.00 | 0.00 | H |
| ATOM | 2199 | HG2  | MET | 144 | -5.653 | 2.454  | -1.019 | 1.00 | 0.00 | H |
| ATOM | 2200 | N    | MET | 145 | -2.827 | 3.048  | -0.531 | 1.00 | 0.00 | N |
| ATOM | 2201 | CA   | MET | 145 | -2.327 | 3.960  | -1.551 | 1.00 | 0.00 | C |
| ATOM | 2202 | C    | MET | 145 | -1.139 | 3.350  | -2.290 | 1.00 | 0.00 | C |
| ATOM | 2203 | O    | MET | 145 | -1.031 | 3.459  | -3.513 | 1.00 | 0.00 | O |
| ATOM | 2204 | CB   | MET | 145 | -1.920 | 5.291  | -0.918 | 1.00 | 0.00 | C |
| ATOM | 2205 | CG   | MET | 145 | -3.072 | 6.028  | -0.253 | 1.00 | 0.00 | C |
| ATOM | 2206 | SD   | MET | 145 | -4.402 | 6.420  | -1.407 | 1.00 | 0.00 | S |
| ATOM | 2207 | CE   | MET | 145 | -4.867 | 4.780  | -1.956 | 1.00 | 0.00 | C |
| ATOM | 2208 | H    | MET | 145 | -2.914 | 3.363  | 0.393  | 1.00 | 0.00 | H |
| ATOM | 2209 | HA   | MET | 145 | -3.123 | 4.136  | -2.257 | 1.00 | 0.00 | H |
| ATOM | 2210 | 2HB3 | MET | 145 | -1.508 | 5.931  | -1.685 | 1.00 | 0.00 | H |
| ATOM | 2211 | 2HG3 | MET | 145 | -2.697 | 6.947  | 0.169  | 1.00 | 0.00 | H |
| ATOM | 2212 | 1HE  | MET | 145 | -4.038 | 4.327  | -2.480 | 1.00 | 0.00 | H |
| ATOM | 2213 | 2HE  | MET | 145 | -5.129 | 4.176  | -1.102 | 1.00 | 0.00 | H |
| ATOM | 2214 | 3HE  | MET | 145 | -5.716 | 4.853  | -2.622 | 1.00 | 0.00 | H |
| ATOM | 2215 | HB2  | MET | 145 | -1.176 | 5.112  | -0.139 | 1.00 | 0.00 | H |
| ATOM | 2216 | HG2  | MET | 145 | -3.505 | 5.400  | 0.525  | 1.00 | 0.00 | H |
| ATOM | 2217 | N    | THR | 146 | -0.247 | 2.710  | -1.541 | 1.00 | 0.00 | N |
| ATOM | 2218 | CA   | THR | 146 | 0.933  | 2.084  | -2.125 | 1.00 | 0.00 | C |
| ATOM | 2219 | C    | THR | 146 | 0.735  | 0.581  | -2.287 | 1.00 | 0.00 | C |
| ATOM | 2220 | O    | THR | 146 | 1.653  | -0.205 | -2.049 | 1.00 | 0.00 | O |
| ATOM | 2221 | CB   | THR | 146 | 2.187  | -2.336 | -1.264 | 1.00 | 0.00 | C |
| ATOM | 2222 | OG1  | THR | 146 | 1.982  | 1.828  | 0.059  | 1.00 | 0.00 | O |
| ATOM | 2223 | CG2  | THR | 146 | 2.507  | 3.822  | -1.199 | 1.00 | 0.00 | C |

|         |      |      |      |      |         |        |         |      |      |    |
|---------|------|------|------|------|---------|--------|---------|------|------|----|
| ATOM    | 2224 | H    | THR  | 146  | -0.388  | 2.657  | -0.572  | 1.00 | 0.00 | H  |
| ATOM    | 2225 | HA   | THR  | 146  | 1.094   | 2.523  | -3.098  | 1.00 | 0.00 | H  |
| ATOM    | 2226 | HB   | THR  | 146  | 3.022   | 1.821  | -1.714  | 1.00 | 0.00 | H  |
| ATOM    | 2227 | 1HG  | THR  | 146  | 1.998   | 2.555  | 0.687   | 1.00 | 0.00 | H  |
| ATOM    | 2228 | 1HG2 | THR  | 146  | 2.911   | 4.060  | -0.224  | 1.00 | 0.00 | H  |
| ATOM    | 2229 | 2HG  | THR  | 146  | 1.606   | 4.394  | -1.365  | 1.00 | 0.00 | H  |
| ATOM    | 2230 | 3HG2 | THR  | 146  | 3.233   | 4.066  | -1.959  | 1.00 | 0.00 | H  |
| ATOM    | 2231 | N    | ALA  | 147  | -0.466  | 0.187  | -2.693  | 1.00 | 0.00 | N  |
| ATOM    | 2232 | CA   | ALA  | 147  | -0.784  | -1.223 | -2.889  | 1.00 | 0.00 | C  |
| ATOM    | 2233 | C    | ALA  | 147  | -1.459  | -1.451 | -4.238  | 1.00 | 0.00 | C  |
| ATOM    | 2234 | O    | ALA  | 147  | -2.600  | -1.038 | -4.450  | 1.00 | 0.00 | O  |
| ATOM    | 2235 | CB   | ALA  | 147  | -1.670  | -1.725 | -1.761  | 1.00 | 0.00 | C  |
| ATOM    | 2236 | H    | ALA  | 147  | -1.158  | 0.861  | -2.867  | 1.00 | 0.00 | H  |
| ATOM    | 2237 | HA   | ALA  | 147  | 0.141   | -1.778 | -2.865  | 1.00 | 0.00 | H  |
| ATOM    | 2238 | 1HB  | ALA  | 147  | -2.544  | -2.204 | -2.176  | 1.00 | 0.00 | H  |
| ATOM    | 2239 | 2HB  | ALA  | 147  | -1.121  | -2.440 | -1.163  | 1.00 | 0.00 | H  |
| ATOM    | 2240 | 3HB  | ALA  | 147  | -1.973  | -0.894 | -1.142  | 1.00 | 0.00 | H  |
| ATOM    | 2241 | N    | LYS  | 148  | -0.748  | -2.108 | -5.147  | 1.00 | 0.00 | N  |
| ATOM    | 2242 | CA   | LYS  | 148  | -1.278  | -2.393 | -6.475  | 1.00 | 0.00 | C  |
| ATOM    | 2243 | C    | LYS  | 148  | -1.699  | -3.855 | -6.590  | 1.00 | 0.00 | C  |
| ATOM    | 2244 | O    | LYS  | 148  | -0.837  | -4.724 | -6.677  | 1.00 | 0.00 | O  |
| ATOM    | 2245 | CB   | LYS  | 148  | -0.235  | -2.066 | -7.545  | 1.00 | 0.00 | C  |
| ATOM    | 2246 | CG   | LYS  | 148  | 0.267   | -0.632 | -7.487  | 1.00 | 0.00 | C  |
| ATOM    | 2247 | CD   | LYS  | 148  | -0.830  | 0.357  | -7.843  | 1.00 | 0.00 | C  |
| ATOM    | 2248 | CE   | LYS  | 148  | -1.056  | 0.421  | -9.345  | 1.00 | 0.00 | C  |
| ATOM    | 2249 | NZ   | LYS  | 148  | 0.029   | 1.171  | -10.036 | 1.00 | 0.00 | N  |
| ATOM    | 2250 | H    | LYS  | 148  | 0.156   | -2.412 | -4.917  | 1.00 | 0.00 | H  |
| ATOM    | 2251 | HA   | LYS  | 148  | -2.145  | -1.767 | -6.626  | 1.00 | 0.00 | H  |
| ATOM    | 2252 | 2HB3 | LYS  | 148  | -0.669  | -2.235 | -8.520  | 1.00 | 0.00 | H  |
| ATOM    | 2253 | 2HG3 | LYS  | 148  | 1.082   | -0.519 | -8.186  | 1.00 | 0.00 | H  |
| ATOM    | 2254 | 2HD3 | LYS  | 148  | -0.549  | 1.337  | -7.487  | 1.00 | 0.00 | H  |
| ATOM    | 2255 | 2HE3 | LYS  | 148  | -1.998  | 0.915  | -9.533  | 1.00 | 0.00 | H  |
| ATOM    | 2256 | 1HZ  | LYS  | 148  | 0.271   | 0.704  | -10.934 | 1.00 | 0.00 | H  |
| ATOM    | 2257 | 2HZ  | LYS  | 148  | 0.878   | 1.205  | -9.436  | 1.00 | 0.00 | H  |
| ATOM    | 2258 | 3HZ  | LYS  | 148  | -0.280  | 2.144  | -10.237 | 1.00 | 0.00 | H  |
| ATOM    | 2259 | HB2  | LYS  | 148  | 0.640   | -2.700 | -7.404  | 1.00 | 0.00 | H  |
| ATOM    | 2260 | HG2  | LYS  | 148  | 0.610   | -0.408 | -6.476  | 1.00 | 0.00 | H  |
| ATOM    | 2261 | HD2  | LYS  | 148  | -1.765  | 0.044  | -7.378  | 1.00 | 0.00 | H  |
| ATOM    | 2262 | HE2  | LYS  | 148  | -1.074  | -0.589 | -9.754  | 1.00 | 0.00 | H  |
| ATOM    | 2263 | HXT  | LYS  | 148  | -2.745  | -4.128 | -6.596  | 1.00 | 0.00 | H  |
| TER     | 2264 |      | LYS  | 148  |         |        |         |      |      |    |
| HETATM  | 2265 | CA   | CA   | 149  | 26.033  | -5.982 | -2.894  | 1.00 | 0.00 | Ca |
| HETATM  | 2266 | CA   | CA   | 150  | 30.426  | 3.339  | -5.149  | 1.00 | 0.00 | Ca |
| HETATM  | 2267 | CA   | CA   | 151  | -12.834 | 7.964  | 11.921  | 1.00 | 0.00 | Ca |
| HETATM  | 2268 | CA   | CA   | 152  | -8.178  | -0.981 | 10.612  | 1.00 | 0.00 | Ca |
| HETATM  | 2269 | F1   | UNK  | 1    | -10.438 | 7.038  | -3.872  | 1.00 | 0.00 | F  |
| HETATM  | 2270 | C1   | UNK  | 1    | -9.340  | 6.280  | -3.838  | 1.00 | 0.00 | C  |
| HETATM  | 2271 | C2   | UNK  | 1    | -8.460  | 6.620  | -2.619  | 1.00 | 0.00 | C  |
| HETATM  | 2272 | O1   | UNK  | 1    | -9.230  | 6.319  | -1.455  | 1.00 | 0.00 | O  |
| HETATM  | 2273 | C3   | UNK  | 1    | -8.563  | 6.029  | -0.306  | 1.00 | 0.00 | C  |
| HETATM  | 2274 | F2   | UNK  | 1    | -9.426  | 5.486  | 0.584   | 1.00 | 0.00 | F  |
| HETATM  | 2275 | F3   | UNK  | 1    | -9.702  | 5.000  | -3.777  | 1.00 | 0.00 | F  |
| HETATM  | 2276 | F4   | UNK  | 1    | -8.658  | 6.455  | -4.970  | 1.00 | 0.00 | F  |
| HETATM  | 2277 | C4   | UNK  | 1    | -7.944  | 8.081  | -2.627  | 1.00 | 0.00 | C  |
| HETATM  | 2278 | F5   | UNK  | 1    | -7.175  | 8.282  | -3.698  | 1.00 | 0.00 | F  |
| HETATM  | 2279 | F6   | UNK  | 1    | -7.197  | 8.335  | -1.554  | 1.00 | 0.00 | F  |
| HETATM  | 2280 | F7   | UNK  | 1    | -8.951  | 8.952  | -2.664  | 1.00 | 0.00 | F  |
| HETATM  | 2281 | H1   | UNK  | 1    | -8.162  | 6.938  | 0.135   | 1.00 | 0.00 | H  |
| HETATM  | 2282 | H2   | UNK  | 1    | -7.785  | 5.290  | -0.497  | 1.00 | 0.00 | H  |
| HETATM  | 2283 | H3   | UNK  | 1    | -7.599  | 5.951  | -2.652  | 1.00 | 0.00 | H  |
| ENDMDL  |      |      |      |      |         |        |         |      |      |    |
| CONNECT | 2270 | 2269 | 2271 | 2275 | 2276    |        |         |      |      |    |
| CONNECT | 2271 | 2270 | 2272 | 2277 | 2283    |        |         |      |      |    |
| CONNECT | 2273 | 2272 | 2274 | 2281 | 2282    |        |         |      |      |    |
| CONNECT | 2277 | 2271 | 2278 | 2279 | 2280    |        |         |      |      |    |
| CONNECT | 2269 | 2270 |      |      |         |        |         |      |      |    |
| CONNECT | 2274 | 2273 |      |      |         |        |         |      |      |    |
| CONNECT | 2275 | 2270 |      |      |         |        |         |      |      |    |
| CONNECT | 2276 | 2270 |      |      |         |        |         |      |      |    |
| CONNECT | 2278 | 2277 |      |      |         |        |         |      |      |    |
| CONNECT | 2279 | 2277 |      |      |         |        |         |      |      |    |
| CONNECT | 2280 | 2277 |      |      |         |        |         |      |      |    |
| CONNECT | 2281 | 2273 |      |      |         |        |         |      |      |    |
| CONNECT | 2282 | 2273 |      |      |         |        |         |      |      |    |
| CONNECT | 2283 | 2271 |      |      |         |        |         |      |      |    |
| CONNECT | 2272 | 2271 | 2273 |      |         |        |         |      |      |    |
| END     |      |      |      |      |         |        |         |      |      |    |



### **Supplemental References:**

1. Franks, N. P. & Lieb, W. R. (1994). Molecular and cellular mechanisms of general anesthesia. *Nature* **367**, 607-614.
2. Streiff, J. H., Juranic, N. O., Macura, S. I., Warner, D. O., Jones, K. A. & Perkins, W. J. (2004). Saturation transfer difference nuclear magnetic resonance spectroscopy as a method for screening proteins for anesthetic binding. *Mol. Pharmacol.* **66**, 929-935.
